# Supplementary material for: Proteomics of Heat-Stress and Ethylene-Mediated Thermotolerance Mechanisms in Tomato Pollen Grains
Source: Front Plant Sci. 2018 Nov 12;9:1558. doi: 10.3389/fpls.2018.01558 (PMC6240657; doi:10.3389/fpls.2018.01558)
Supplement: Supplementary file 12 [file Table_12.XLSX]

## Sheet: Peptides_Pollen_psms
Table S12. Spectra of all identified peptides in the pollen and leaf samples.
Confidence Level	Search ID	Processing Node No	Sequence	Unique Sequence ID	PSM Ambiguity	Protein Descriptions	# Proteins	# Protein Groups	Protein Group Accessions	Modifications	Activation Type	DeltaScore	DeltaCn	Rank	Search Engine Rank	q-Value	PEP	Decoy Peptides Matched	Peptides Matched	XCorr	Probability	SpScore	# Missed Cleavages	Isolation Interference [%]	Ion Inject Time [ms]	Intensity	Charge	m/z [Da]	MH+ [Da]	Delta Mass [Da]	Delta Mass [PPM]	RT [min]	First Scan	Last Scan	MS Order	Ions Matched	Matched Ions	Total Ions	Spectrum File	Annotation
High	D	2	FIADPQTEGIVLIGEIGGTAEEDAAALIK	21877	Unambiguous	genomic_reference:SL2.31ch01 evidence_code:10F1H1E1IEG gene_region:2105209-2112407 functional_description:"Succinyl-CoA ligase (AHRD V1 ***- B9RL91_RICCO); contains Interpro domain(s) IPR005810 Succinyl-CoA ligase, alpha subunit "	2	1	Solyc01g007910.1.1		CID	1	0	1	1	0	3.31e-09	457	444	4.9	0	2340.27	0	2	25	170600	4	736.141	2941.54	0	0.43	95.02	8170	8170	MS2	57/168	57	168	AH2.RAW
High	K	2	TTGIVmDSGDGVSHTVPIYEGYALPHAILR	14960	Unambiguous	genomic_reference:SL2.31ch06 evidence_code:10F0H1E1IEG gene_region:43631077-43633248 functional_description:"Actin (AHRD V1 ***- B5M4V6_TOBAC); contains Interpro domain(s) IPR004000 Actin/actin-like "|genomic_reference:SL2.31ch11 evidence_code:10F0H1E1IEG gene_region:48685769-48687049 functional_description:"Actin (AHRD V1 ***- B5M4V6_TOBAC); contains Interpro domain(s) IPR004000 Actin/actin-like…	2	2	Solyc06g076090.1.1;Solyc11g065990.1.1	M6(Oxidation)	CID	1	0	1	1	0	2.36e-07	644	624	4.7	0	1864.03	0	26	24	718300	4	797.155	3185.6	0	1.13	50.42	4627	4627	MS2	52/174	52	174	EAH2.RAW
High	C	2	DKPLPSWSDSDVEEFIASDPLHGPTLR	17453	Unambiguous	genomic_reference:SL2.31ch06 evidence_code:10F1H1E1IEG gene_region:42013245-42016680 functional_description:"Unknown Protein (AHRD V1)"	1	1	Solyc06g073900.1.1		CID	1	0	1	1	0	8.51e-12	725	720	5.2	0	3058.49	0	4	25	1203000	4	752.872	3008.46	0	0.25	62.87	5587	5587	MS2	50/156	50	156	AC3.RAW
High	F	2	FIADPQTEGIVLIGEIGGTAEEDAAALIK	21877	Unambiguous	genomic_reference:SL2.31ch01 evidence_code:10F1H1E1IEG gene_region:2105209-2112407 functional_description:"Succinyl-CoA ligase (AHRD V1 ***- B9RL91_RICCO); contains Interpro domain(s) IPR005810 Succinyl-CoA ligase, alpha subunit "	2	1	Solyc01g007910.1.1		CID	1	0	1	1	0	2.85e-10	457	448	4.56	0	1796.1	0	6	25	93030	4	736.14	2941.54	0	-0.15	96.83	8562	8562	MS2	49/168	49	168	AH4.RAW
High	A	2	DKPLPSWSDSDVEEFIASDPLHGPTLR	17453	Unambiguous	genomic_reference:SL2.31ch06 evidence_code:10F1H1E1IEG gene_region:42013245-42016680 functional_description:"Unknown Protein (AHRD V1)"	1	1	Solyc06g073900.1.1		CID	1	0	1	1	0	1.64e-10	707	696	4.55	0	2403.61	0	4	25	729700	4	752.871	3008.46	0	-0.64	63.8	5672	5672	MS2	49/156	49	156	AC1.RAW
High	K	2	DKPLPSWSDSDVEEFIASDPLHGPTLR	17453	Unambiguous	genomic_reference:SL2.31ch06 evidence_code:10F1H1E1IEG gene_region:42013245-42016680 functional_description:"Unknown Protein (AHRD V1)"	1	1	Solyc06g073900.1.1		CID	1	0	1	1	0	1.9e-11	716	706	5.13	0	2203.69	0	32	25	442900	4	752.871	3008.46	0	-0.32	63.16	5705	5705	MS2	48/156	48	156	EAH2.RAW
High	B	2	DKPLPSWSDSDVEEFIASDPLHGPTLR	17453	Unambiguous	genomic_reference:SL2.31ch06 evidence_code:10F1H1E1IEG gene_region:42013245-42016680 functional_description:"Unknown Protein (AHRD V1)"	1	1	Solyc06g073900.1.1		CID	1	0	1	1	0	1.65e-07	708	705	4.43	0	2537.28	0	9	25	425200	4	752.872	3008.47	0	0.57	62.78	5612	5612	MS2	47/156	47	156	AC2.RAW
High	H	2	DKPLPSWSDSDVEEFIASDPLHGPTLR	17453	Unambiguous	genomic_reference:SL2.31ch06 evidence_code:10F1H1E1IEG gene_region:42013245-42016680 functional_description:"Unknown Protein (AHRD V1)"	1	1	Solyc06g073900.1.1		CID	1	0	1	1	0	7.24e-06	733	723	4.33	0	2340.82	0	16	25	795400	4	752.872	3008.47	0	1.38	67.98	6142	6142	MS2	47/156	47	156	EAC3_150410225534.RAW
High	L	2	DKPLPSWSDSDVEEFIASDPLHGPTLR	17453	Unambiguous	genomic_reference:SL2.31ch06 evidence_code:10F1H1E1IEG gene_region:42013245-42016680 functional_description:"Unknown Protein (AHRD V1)"	1	1	Solyc06g073900.1.1		CID	1	0	1	1	0	3.19e-16	710	710	4.86	0	2013.4	0	24	25	354900	4	752.873	3008.47	0	1.87	66.37	5977	5977	MS2	46/156	46	156	EAH4.RAW
High	I	2	TVDTTGAGDAFVGSLLVSIAKDPSIFQDEEK	20424	Unambiguous	genomic_reference:SL2.31ch11 evidence_code:10F0H1E0IEG gene_region:34310265-34312777 functional_description:"5-dehydro-2-deoxygluconokinase (AHRD V1 **-- IOLC_GEOTN); contains Interpro domain(s) IPR011611 Carbohydrate/purine kinase "	1	1	Solyc11g042850.1.1		CID	1	0	1	1	0	2.53e-06	594	636	4.76	0	1512.53	1	8	25	154700	4	803.407	3210.61	0	0.82	76.54	6895	6895	MS2	45/180	45	180	EAC4_150411011441.RAW
High	D	2	DKPLPSWSDSDVEEFIASDPLHGPTLR	17453	Unambiguous	genomic_reference:SL2.31ch06 evidence_code:10F1H1E1IEG gene_region:42013245-42016680 functional_description:"Unknown Protein (AHRD V1)"	1	1	Solyc06g073900.1.1		CID	1	0	1	1	0	5.3e-09	725	718	4.12	0	2234.09	0	21	25	484400	4	752.872	3008.47	0	1.06	62.61	5542	5542	MS2	45/156	45	156	AH2.RAW
High	J	2	DKPLPSWSDSDVEEFIASDPLHGPTLR	17453	Unambiguous	genomic_reference:SL2.31ch06 evidence_code:10F1H1E1IEG gene_region:42013245-42016680 functional_description:"Unknown Protein (AHRD V1)"	1	1	Solyc06g073900.1.1		CID	1	0	1	1	0	4.87e-06	707	695	4.69	0	1759.73	0	29	20	1070000	4	752.87	3008.46	0	-1.46	64.29	5936	5936	MS2	45/156	45	156	EAH1.RAW
High	G	2	TVDTTGAGDAFVGSLLVSIAKDPSIFQDEEK	20424	Unambiguous	genomic_reference:SL2.31ch11 evidence_code:10F0H1E0IEG gene_region:34310265-34312777 functional_description:"5-dehydro-2-deoxygluconokinase (AHRD V1 **-- IOLC_GEOTN); contains Interpro domain(s) IPR011611 Carbohydrate/purine kinase "	1	1	Solyc11g042850.1.1		CID	1	0	1	1	0	3.15e-16	604	643	4.27	0	1817.3	1	6	25	705100	4	803.407	3210.6	0	-0.24	77.7	6883	6883	MS2	44/180	44	180	EAC2.RAW
High	G	2	QAFDEAIAELDTLSEESYKDSTLImQLLR	21917	Unambiguous	genomic_reference:SL2.31ch01 evidence_code:10F0H1E0IEG gene_region:5171992-5174989 functional_description:"14-3-3-like protein GF14 epsilon (AHRD V1 **-- 14310_ARATH); contains Interpro domain(s) IPR000308 14-3-3 protein "|genomic_reference:SL2.31ch05 evidence_code:10F0H1E1IEG gene_region:5666223-5669351 functional_description:"14-3-3 protein sigma gamma zeta beta/alpha (AHRD V1 **-- Q16QZ7_AEDAE…	2	2	Solyc01g010360.1.1;Solyc05g012420.1.1	M25(Oxidation)	CID	1	0	1	1	0	3.15e-16	696	654	5.32	0	846.68	1	1	25	228400	4	837.166	3345.64	0	0.87	95.62	8363	8363	MS2	44/168	44	168	EAC2.RAW
High	B	2	TVDTTGAGDAFVGSLLVSIAKDPSIFQDEEK	20424	Unambiguous	genomic_reference:SL2.31ch11 evidence_code:10F0H1E0IEG gene_region:34310265-34312777 functional_description:"5-dehydro-2-deoxygluconokinase (AHRD V1 **-- IOLC_GEOTN); contains Interpro domain(s) IPR011611 Carbohydrate/purine kinase "	1	1	Solyc11g042850.1.1		CID	1	0	1	1	0	1.55e-06	602	629	5.68	0	1582.63	1	7	25	189900	4	803.407	3210.61	0	0.21	77.05	6794	6794	MS2	43/180	43	180	AC2.RAW
High	A	2	KYGQDATNVGDEGGFAPNIQENK	6991	Unambiguous	genomic_reference:SL2.31ch09 evidence_code:10F1H1E1IEG gene_region:2371333-2375783 functional_description:"Enolase (AHRD V1 ***- C5J0G6_TOBAC); contains Interpro domain(s) IPR000941 Enolase "|genomic_reference:SL2.31ch10 evidence_code:10F1H1E1IEG gene_region:63994775-63999383 functional_description:"Enolase (AHRD V1 ***- C5J0G6_TOBAC); contains Interpro domain(s) IPR000941 Enolase "	2	2	Solyc09g009020.1.1;Solyc10g085550.1.1		CID	1	0	1	1	0	5.75e-11	554	498	5.02	0	1980.61	1	10	25	1169000	3	818.051	2452.14	0	0.59	26.07	2441	2441	MS2	42/88	42	88	AC1.RAW
High	H	2	LQHDLITSLNDLEESNSELSK	36263	Unambiguous	genomic_reference:SL2.31ch10 evidence_code:10F0H0E1IEG gene_region:2014736-2015443 functional_description:"Unknown Protein (AHRD V1)"	1	1	Solyc10g007780.1.1		CID	1	0	1	1	0	9.89e-10	676	692	5.11	0	4287.94	0	12	25	1126000	3	795.732	2385.18	0	0.94	51.18	4714	4714	MS2	42/80	42	80	EAC3_150410225534.RAW
High	G	2	WNYDGSSTGQASGEDSEVILYPQAIFKDPFRR	16933	Unambiguous	genomic_reference:SL2.31ch05 evidence_code:10F0H1E1IEG gene_region:60677361-60680424 functional_description:"Glutamine synthetase (AHRD V1 ***- A9PB10_POPTR); contains Interpro domain(s) IPR008146 Glutamine synthetase, catalytic region "	1	1	Solyc05g051250.1.1		CID	1	0	1	1	0	3.15e-16	707	702	4.55	0	980.14	2	5	25	1797000	4	909.188	3633.73	0	1.72	59.93	5415	5415	MS2	42/186	42	186	EAC2.RAW
High	J	2	TVDTTGAGDAFVGSLLVSIAKDPSIFQDEEK	20424	Unambiguous	genomic_reference:SL2.31ch11 evidence_code:10F0H1E0IEG gene_region:34310265-34312777 functional_description:"5-dehydro-2-deoxygluconokinase (AHRD V1 **-- IOLC_GEOTN); contains Interpro domain(s) IPR011611 Carbohydrate/purine kinase "	1	1	Solyc11g042850.1.1		CID	1	0	1	1	0	0.000226	610	639	5.61	0	1129.9	1	12	25	501000	4	803.407	3210.61	0	-0.01	78.98	7157	7157	MS2	42/180	42	180	EAH1.RAW
High	C	2	VNVADVNVPVVGGHAGVTILPLFSQATPSANLSSEDIQALTK	63137	Unambiguous	genomic_reference:SL2.31ch12 evidence_code:10F1H1E1IEG gene_region:5028935-5033187 functional_description:"Malate dehydrogenase (AHRD V1 ***- Q8L5C9_SOLTU); contains Interpro domain(s) IPR010097 Malate dehydrogenase, NAD-dependent, eukaryotes and gamma proteobacteria "	1	1	Solyc12g014180.1.1		CID	1	0	1	1	0	3.55e-09	170	155	5.59	0	1094.68	0	0	25	175800	3	1410.42	4229.25	0	1.42	69.07	6089	6089	MS2	42/164	42	164	AC3.RAW
High	D	2	VNVADVNVPVVGGHAGVTILPLFSQATPSANLSSEDIQALTK	63137	Unambiguous	genomic_reference:SL2.31ch12 evidence_code:10F1H1E1IEG gene_region:5028935-5033187 functional_description:"Malate dehydrogenase (AHRD V1 ***- Q8L5C9_SOLTU); contains Interpro domain(s) IPR010097 Malate dehydrogenase, NAD-dependent, eukaryotes and gamma proteobacteria "	1	1	Solyc12g014180.1.1		CID	1	0	1	1	0	4.34e-09	180	164	5.57	0	1213	0	1	25	532300	3	1410.42	4229.25	0	0.29	69.36	6097	6097	MS2	42/164	42	164	AH2.RAW
High	I	2	DKPLPSWSDSDVEEFIASDPLHGPTLR	17453	Unambiguous	genomic_reference:SL2.31ch06 evidence_code:10F1H1E1IEG gene_region:42013245-42016680 functional_description:"Unknown Protein (AHRD V1)"	1	1	Solyc06g073900.1.1		CID	1	0	1	1	0	1.14e-07	725	718	4.86	0	1632	0	8	25	265900	4	752.872	3008.47	0	1.06	62.9	5713	5713	MS2	42/156	42	156	EAC4_150411011441.RAW
High	G	2	WFDTNYHFIVPELGPDVNFSYASHK	17791	Unambiguous	genomic_reference:SL2.31ch10 evidence_code:10F1H1E1IEG gene_region:61889662-61892937 functional_description:"5-methyltetrahydropteroyltriglutamate--homocysteine methyltransferase (AHRD V1 ***- B6UF55_MAIZE); contains Interpro domain(s) IPR006276 5-methyltetrahydropteroyltriglutamate--homocysteine S-methyltransferase "	1	1	Solyc10g081510.1.1		CID	1	0	1	1	0	3.15e-16	642	623	5.95	0	1795.16	0	3	25	2178000	3	995.141	2983.41	0	1.19	63.38	5702	5702	MS2	41/96	41	96	EAC2.RAW
High	K	2	TNDLAGDGTTTSVVLAQGLIAEGVK	15814	Unambiguous	genomic_reference:SL2.31ch01 evidence_code:10F1H1E1IEG gene_region:33327275-33331326 functional_description:"chaperonin (AHRD V1 ***- B4VMY1_9CYAN); contains Interpro domain(s) IPR001844 Chaperonin Cpn60 "	1	1	Solyc01g028810.1.1		CID	1	0	1	1	0	8.36e-10	456	510	5.72	0	2405.02	0	32	25	636300	3	810.763	2430.27	0	0.34	56.38	5131	5131	MS2	41/96	41	96	EAH2.RAW
High	E	2	LQHDLITSLNDLEESNSELSK	36263	Unambiguous	genomic_reference:SL2.31ch10 evidence_code:10F0H0E1IEG gene_region:2014736-2015443 functional_description:"Unknown Protein (AHRD V1)"	1	1	Solyc10g007780.1.1		CID	1	0	1	1	0	0.000636	682	695	5.3	0	3707.43	0	16	25	601300	3	795.732	2385.18	0	1.1	54.8	4929	4929	MS2	41/80	41	80	AH3.RAW
High	E	2	DKPLPSWSDSDVEEFIASDPLHGPTLR	17453	Unambiguous	genomic_reference:SL2.31ch06 evidence_code:10F1H1E1IEG gene_region:42013245-42016680 functional_description:"Unknown Protein (AHRD V1)"	1	1	Solyc06g073900.1.1		CID	1	0	1	1	0	0.000679	711	712	4.32	0	1623.12	0	9	25	533600	4	752.872	3008.46	0	0.41	68.95	6113	6113	MS2	41/156	41	156	AH3.RAW
High	I	2	TDLIEVDKETLDMLSALGmSDLPGVVK	18972	Unambiguous	genomic_reference:SL2.31ch11 evidence_code:10F1H1E1IEG gene_region:1295503-1295937 functional_description:"40S ribosomal protein S17-like protein (AHRD V1 ***- Q3HRX4_SOLTU); contains Interpro domain(s) IPR001210 Ribosomal protein S17e "	2	1	Solyc11g006690.1.1	M19(Oxidation)	CID	1	0	1	1	0	3.04e-05	604	598	4.97	0	1623.51	1	18	25	98530	4	727.126	2905.48	0	0.85	79.59	7166	7166	MS2	41/156	41	156	EAC4_150411011441.RAW
High	I	2	KYGQDATNVGDEGGFAPNIQENK	6991	Unambiguous	genomic_reference:SL2.31ch09 evidence_code:10F1H1E1IEG gene_region:2371333-2375783 functional_description:"Enolase (AHRD V1 ***- C5J0G6_TOBAC); contains Interpro domain(s) IPR000941 Enolase "|genomic_reference:SL2.31ch10 evidence_code:10F1H1E1IEG gene_region:63994775-63999383 functional_description:"Enolase (AHRD V1 ***- C5J0G6_TOBAC); contains Interpro domain(s) IPR000941 Enolase "	2	2	Solyc09g009020.1.1;Solyc10g085550.1.1		CID	1	0	1	1	0	2.69e-10	569	510	5	0	1740.23	1	2	25	749900	3	818.051	2452.14	0	0.89	27.63	2642	2642	MS2	40/88	40	88	EAC4_150411011441.RAW
High	C	2	LQHDLITSLNDLEESNSELSK	36263	Unambiguous	genomic_reference:SL2.31ch10 evidence_code:10F0H0E1IEG gene_region:2014736-2015443 functional_description:"Unknown Protein (AHRD V1)"	1	1	Solyc10g007780.1.1		CID	1	0	1	1	0	5.43e-10	687	688	4.43	0	3766.88	0	20	23	1673000	3	795.732	2385.18	0	1.94	49.78	4510	4510	MS2	40/80	40	80	AC3.RAW
High	E	2	VNVADVNVPVVGGHAGVTILPLFSQATPSANLSSEDIQALTK	63137	Unambiguous	genomic_reference:SL2.31ch12 evidence_code:10F1H1E1IEG gene_region:5028935-5033187 functional_description:"Malate dehydrogenase (AHRD V1 ***- Q8L5C9_SOLTU); contains Interpro domain(s) IPR010097 Malate dehydrogenase, NAD-dependent, eukaryotes and gamma proteobacteria "	1	1	Solyc12g014180.1.1		CID	1	0	1	1	0	1.66e-05	170	156	4.75	0	1083.77	0	0	25	111800	3	1410.42	4229.25	0	1.42	75.03	6619	6619	MS2	40/164	40	164	AH3.RAW
High	G	2	AAIRDPDPVVFLENELLYGESFPVSAEVLDSSFALPIGK	148589	Unambiguous	genomic_reference:SL2.31ch03 evidence_code:10F1H1E1IEG gene_region:53456293-53462791 functional_description:"Pyruvate dehydrogenase E1 component subunit beta (AHRD V1 **-* B6T6H3_MAIZE); contains Interpro domain(s) IPR005475 Transketolase, central region "	1	1	Solyc03g097680.1.1		CID	1	0	1	1	0	3.15e-16	338	316	4.19	0	1130.81	1	0	25	159900	3	1402.4	4205.17	0	0.94	95.41	8346	8346	MS2	40/152	40	152	EAC2.RAW
High	E	2	FTQANSEVSALLGRIPSAVGYQPTLATDLGGLQER	101096	Unambiguous	genomic_reference:SL2.31ch02 evidence_code:10F0H1E0IEG gene_region:47123903-47126760 functional_description:"ATP synthase subunit beta (AHRD V1 ***- Q9ZR78_NICSY); contains Interpro domain(s) IPR005722 ATPase, F1 complex, beta subunit "|genomic_reference:SL2.31ch04 evidence_code:10F1H1E1IEG gene_region:1237570-1241219 functional_description:"ATP synthase subunit beta (AHRD V1 ***- O82722_NICSY); …	3	3	Solyc02g091130.1.1;Solyc04g007550.1.1;Solyc05g008460.1.1		CID	1	0	1	1	0	0.000229	342	336	5.37	0	1164.93	1	0	25	332000	3	1220.64	3659.91	0	2.7	74.13	6541	6541	MS2	40/136	40	136	AH3.RAW
High	D	2	IINISSVVGLVGNAGQANYSAAK	80699	Unambiguous	genomic_reference:SL2.31ch06 evidence_code:10F1H1E1IEG gene_region:40690038-40695094 functional_description:"3-oxoacyl-reductase (AHRD V1 ***- B6THT6_MAIZE); contains Interpro domain(s) IPR011284 3-oxoacyl-(acyl-carrier-protein) reductase "	1	1	Solyc06g071910.1.1		CID	1	0	1	1	0	4.67e-08	360	352	4.41	0	2473.1	0	8	25	968600	3	749.41	2246.21	0	0.35	59.46	5279	5279	MS2	39/88	39	88	AH2.RAW
High	G	2	KYGQDATNVGDEGGFAPNIQENK	6991	Unambiguous	genomic_reference:SL2.31ch09 evidence_code:10F1H1E1IEG gene_region:2371333-2375783 functional_description:"Enolase (AHRD V1 ***- C5J0G6_TOBAC); contains Interpro domain(s) IPR000941 Enolase "|genomic_reference:SL2.31ch10 evidence_code:10F1H1E1IEG gene_region:63994775-63999383 functional_description:"Enolase (AHRD V1 ***- C5J0G6_TOBAC); contains Interpro domain(s) IPR000941 Enolase "	2	2	Solyc09g009020.1.1;Solyc10g085550.1.1		CID	1	0	1	1	0	3.15e-16	538	493	5.2	0	1766.61	1	25	25	1035000	3	818.051	2452.14	0	0.14	23.51	2290	2290	MS2	39/88	39	88	EAC2.RAW
High	D	2	KDLYGNIVLSGGTTmFPGIADR	13482	Unambiguous	genomic_reference:SL2.31ch10 evidence_code:10F1H1E1IEG gene_region:61080001-61081737 functional_description:"Actin (AHRD V1 ***- B5M4V6_TOBAC); contains Interpro domain(s) IPR004000 Actin/actin-like "|genomic_reference:SL2.31ch01 evidence_code:10F0H1E1IEG gene_region:84898357-84900149 functional_description:"Actin (AHRD V1 ***- Q6F4H4_TOBAC); contains Interpro domain(s) IPR004000 Actin/actin-like…	6	2	Solyc01g104770.1.1;Solyc11g065990.1.1	M15(Oxidation)	CID	1	0	1	1	0	2.43e-08	657	651	4.97	0	1371.57	1	2	24	2539000	3	781.067	2341.19	0	0.62	47.17	4255	4255	MS2	39/84	39	84	AH2.RAW
High	B	2	LQHDLITSLNDLEESNSELSK	36263	Unambiguous	genomic_reference:SL2.31ch10 evidence_code:10F0H0E1IEG gene_region:2014736-2015443 functional_description:"Unknown Protein (AHRD V1)"	1	1	Solyc10g007780.1.1		CID	1	0	1	1	0	8.22e-09	692	701	5.41	0	3548	0	26	25	507700	3	795.732	2385.18	0	1.33	50.25	4567	4567	MS2	39/80	39	80	AC2.RAW
High	C	2	FDDGLPPILTALEVLDNQIR	21890	Unambiguous	genomic_reference:SL2.31ch04 evidence_code:10F1H1E1IEG gene_region:1237570-1241219 functional_description:"ATP synthase subunit beta (AHRD V1 ***- O82722_NICSY); contains Interpro domain(s) IPR005722 ATPase, F1 complex, beta subunit "	1	1	Solyc04g007550.1.1		CID	1	0	1	1	0	1.05e-10	401	360	4.1	0	1829.74	0	1	13	6107000	3	747.071	2239.2	0	0.96	95.49	8070	8070	MS2	39/76	39	76	AC3.RAW
High	H	2	LYmEARPmEEGLAEAIDEGR	9460	Unambiguous	genomic_reference:SL2.31ch08 evidence_code:10F0H1E1IEG gene_region:49546658-49549476 functional_description:"Elongation factor EF-2 (AHRD V1 **** Q9SGT4_ARATH); contains Interpro domain(s) IPR000795 Protein synthesis factor, GTP-binding "	2	1	Solyc08g062920.1.1	M3(Oxidation); M8(Oxidation)	CID	1	0	1	1	0	3.32e-09	419	442	4.87	0	2254.89	0	4	8	6507000	3	771.356	2312.05	0	0.33	35.45	3355	3355	MS2	39/76	39	76	EAC3_150410225534.RAW
High	A	2	LVSQKFEDPAEGEDVLVGK	9627	Unambiguous	genomic_reference:SL2.31ch12 evidence_code:10F1H1E1IEG gene_region:47132509-47140184 functional_description:"V-type ATP synthase alpha chain (AHRD V1 ***- VATA_METTH); contains Interpro domain(s) IPR005725 ATPase, V1 complex, subunit A "	1	1	Solyc12g055800.1.1		CID	1	0	1	1	0	1.29e-10	650	605	5.39	0	2535.45	1	29	16	1998000	3	687.357	2060.06	0	1.09	34.83	3223	3223	MS2	39/72	39	72	AC1.RAW
High	G	2	LVSQKFEDPAEGEDVLVGK	9627	Unambiguous	genomic_reference:SL2.31ch12 evidence_code:10F1H1E1IEG gene_region:47132509-47140184 functional_description:"V-type ATP synthase alpha chain (AHRD V1 ***- VATA_METTH); contains Interpro domain(s) IPR005725 ATPase, V1 complex, subunit A "	1	1	Solyc12g055800.1.1		CID	1	0	1	1	0	3.15e-16	628	590	4.5	0	2332.91	1	32	11	3918000	3	687.357	2060.06	0	0.2	31.98	3053	3053	MS2	39/72	39	72	EAC2.RAW
High	H	2	TTGIVLDSGDGVSHTVPIYEGYALPHAILR	15317	Unambiguous	genomic_reference:SL2.31ch03 evidence_code:10F1H1E1IEG gene_region:44382119-44383552 functional_description:"Actin (AHRD V1 ***- Q7XZJ2_GOSHI); contains Interpro domain(s) IPR004000 Actin/actin-like "|genomic_reference:SL2.31ch10 evidence_code:10F1H1E1IEG gene_region:61080001-61081737 functional_description:"Actin (AHRD V1 ***- B5M4V6_TOBAC); contains Interpro domain(s) IPR004000 Actin/actin-like…	8	3	Solyc03g078400.1.1;Solyc01g104770.1.1;Solyc10g086460.1.1		CID	1	0	1	1	0.00031	0.000991	431	403	4.17	0	718.38	0	14	25	563100	4	788.668	3151.65	0	2.13	55.6	5092	5092	MS2	39/174	39	174	EAC3_150410225534.RAW
High	C	2	SFAEALEVVPYTLAENAGLNPIAIVTELR	65699	Unambiguous	genomic_reference:SL2.31ch03 evidence_code:10F0H1E1IEG gene_region:61737283-61738902 functional_description:"T-complex protein 1 subunit delta (AHRD V1 ***- B9S339_RICCO); contains Interpro domain(s) IPR012717 T-complex protein 1, delta subunit "	1	1	Solyc03g118910.1.1		CID	1	0	1	1	0	1.2e-05	280	269	4.53	0	1432.7	0	7	25	112900	4	775.921	3100.66	0	1.42	96.93	8195	8195	MS2	39/168	39	168	AC3.RAW
High	A	2	TTGIVLDSGDGVSHTVPIYEGYALPHAILR	15317	Unambiguous	genomic_reference:SL2.31ch03 evidence_code:10F1H1E1IEG gene_region:44382119-44383552 functional_description:"Actin (AHRD V1 ***- Q7XZJ2_GOSHI); contains Interpro domain(s) IPR004000 Actin/actin-like "|genomic_reference:SL2.31ch10 evidence_code:10F1H1E1IEG gene_region:61080001-61081737 functional_description:"Actin (AHRD V1 ***- B5M4V6_TOBAC); contains Interpro domain(s) IPR004000 Actin/actin-like…	8	3	Solyc03g078400.1.1;Solyc01g104770.1.1;Solyc10g086460.1.1		CID	1	0	1	1	0	1.04e-08	461	441	5.33	0	1538.12	0	2	25	1303000	3	1051.22	3151.64	0	-0.09	55.37	4968	4968	MS2	39/116	39	116	AC1.RAW
High	G	2	AEATDVANAVLDGTDAILLGAETLR	21397	Unambiguous	genomic_reference:SL2.31ch09 evidence_code:10F1H1E1IEG gene_region:2260322-2267191 functional_description:"Pyruvate kinase (AHRD V1 ***- A9P7U5_POPTR); contains Interpro domain(s) IPR001697 Pyruvate kinase "|genomic_reference:SL2.31ch10 evidence_code:10F1H1E1IEG gene_region:62809938-62815473 functional_description:"Pyruvate kinase (AHRD V1 ***- Q94KE3_ARATH); contains Interpro domain(s) IPR001697…	2	2	Solyc09g008840.1.1;Solyc10g083720.1.1		CID	1	0	1	1	0	3.15e-16	548	517	4.45	0	1964.42	0	4	25	628300	3	833.77	2499.3	0	0.6	87.62	7691	7691	MS2	38/96	38	96	EAC2.RAW
High	J	2	ALLAIPTTIADNAGLDSAELIAQLR	20912	Unambiguous	genomic_reference:SL2.31ch11 evidence_code:10F1H1E1IEG gene_region:50651405-50656732 functional_description:"T-complex protein 1 subunit beta (AHRD V1 ***- B6T8X5_MAIZE); contains Interpro domain(s) IPR012716 T-complex protein 1, beta subunit "	1	1	Solyc11g069000.1.1		CID	1	0	1	1	0	2.89e-05	202	209	4.63	0	1370.99	0	9	25	828300	3	850.808	2550.41	0	-1.54	83.24	7505	7505	MS2	38/96	38	96	EAH1.RAW
High	F	2	FGNIELSPASGILNYGQGLFEGLK	19927	Rejected	genomic_reference:SL2.31ch03 evidence_code:10F0H1E1IEG gene_region:11507825-11514153 functional_description:"Branched-chain amino acid aminotransferase (AHRD V1 **** Q9SNY9_SOLTU); contains Interpro domain(s) IPR005786 Branched-chain amino acid aminotransferase II "	1	0			CID	0.026	0	1	1	0	1.17e-12	495	513	4.62	0	2504.8	0	22	25	437200	3	842.109	2524.31	0	1.35	78.47	6993	6993	MS2	38/92	38	92	AH4.RAW
High	F	2	FGNIELSPSAGILNYGQGLFEGLK	19928	Selected	genomic_reference:SL2.31ch02 evidence_code:10F0H1E1IEG gene_region:47758983-47765135 functional_description:"Branched-chain-amino-acid aminotransferase (AHRD V1 ***- Q9SNY8_SOLTU); contains Interpro domain(s) IPR005786 Branched-chain amino acid aminotransferase II "	1	1	Solyc02g091970.1.1		CID		0.026	2	2	0	9.36e-13	495	513	4.5	0	2504.8	0	22	25	437200	3	842.109	2524.31	0	1.35	78.47	6993	6993	MS2	38/92	38	92	AH4.RAW
High	L	2	AGDSSAEELATATQVQGPYLPITR	13090	Unambiguous	genomic_reference:SL2.31ch08 evidence_code:10F1H1E1IEG gene_region:56989651-56990657 functional_description:"60S ribosomal protein L13 (AHRD V1 ***- Q3HRY7_SOLTU); contains Interpro domain(s) IPR001380 Ribosomal protein L13e "	1	1	Solyc08g075700.1.1		CID	1	0	1	1	0	3.19e-16	682	647	4.85	0	2473.95	0	3	25	644600	3	825.751	2475.24	0	0.33	49	4499	4499	MS2	38/92	38	92	EAH4.RAW
High	D	2	FLLDDVYRNPGPLQFDGPGADAK	15277	Unambiguous	genomic_reference:SL2.31ch12 evidence_code:10F1H1E1IEG gene_region:63232222-63238853 functional_description:"Diphosphate--fructose-6-phosphate 1-phosphotransferase (AHRD V1 ***- C8PT93_9SPIO); contains Interpro domain(s) IPR011183 Pyrophosphate-dependent phosphofructokinase PfpB "	2	1	Solyc12g095760.1.1		CID	1	0	1	1	0	9.14e-10	710	717	4.71	0	2409.31	1	17	25	747100	3	835.753	2505.24	0	1.44	53.55	4789	4789	MS2	38/88	38	88	AH2.RAW
High	E	2	FLLDDVYRNPGPLQFDGPGADAK	15277	Unambiguous	genomic_reference:SL2.31ch12 evidence_code:10F1H1E1IEG gene_region:63232222-63238853 functional_description:"Diphosphate--fructose-6-phosphate 1-phosphotransferase (AHRD V1 ***- C8PT93_9SPIO); contains Interpro domain(s) IPR011183 Pyrophosphate-dependent phosphofructokinase PfpB "	2	1	Solyc12g095760.1.1		CID	1	0	1	1	0	2.08e-05	717	718	5.13	0	2326.43	1	3	23	2374000	3	835.752	2505.24	0	0.42	58.89	5269	5269	MS2	38/88	38	88	AH3.RAW
High	H	2	KYGQDATNVGDEGGFAPNIQENK	6991	Unambiguous	genomic_reference:SL2.31ch09 evidence_code:10F1H1E1IEG gene_region:2371333-2375783 functional_description:"Enolase (AHRD V1 ***- C5J0G6_TOBAC); contains Interpro domain(s) IPR000941 Enolase "|genomic_reference:SL2.31ch10 evidence_code:10F1H1E1IEG gene_region:63994775-63999383 functional_description:"Enolase (AHRD V1 ***- C5J0G6_TOBAC); contains Interpro domain(s) IPR000941 Enolase "	2	2	Solyc09g009020.1.1;Solyc10g085550.1.1		CID	1	0	1	1	0	8.48e-10	538	491	5.08	0	1459.73	1	26	25	1502000	3	818.051	2452.14	0	0.29	27.04	2591	2591	MS2	38/88	38	88	EAC3_150410225534.RAW
High	H	2	FLLDDVYRNPGPLQFDGPGADAK	15277	Unambiguous	genomic_reference:SL2.31ch12 evidence_code:10F1H1E1IEG gene_region:63232222-63238853 functional_description:"Diphosphate--fructose-6-phosphate 1-phosphotransferase (AHRD V1 ***- C8PT93_9SPIO); contains Interpro domain(s) IPR011183 Pyrophosphate-dependent phosphofructokinase PfpB "	2	1	Solyc12g095760.1.1		CID	1	0	1	1	0	5.58e-07	719	719	5.13	0	2376.85	1	15	23	2378000	3	835.752	2505.24	0	0.64	55.85	5112	5112	MS2	38/88	38	88	EAC3_150410225534.RAW
High	L	2	FLLDDVYRNPGPLQFDGPGADAK	15277	Unambiguous	genomic_reference:SL2.31ch12 evidence_code:10F1H1E1IEG gene_region:63232222-63238853 functional_description:"Diphosphate--fructose-6-phosphate 1-phosphotransferase (AHRD V1 ***- C8PT93_9SPIO); contains Interpro domain(s) IPR011183 Pyrophosphate-dependent phosphofructokinase PfpB "	2	1	Solyc12g095760.1.1		CID	1	0	1	1	0	3.19e-16	716	719	4.59	0	2624.94	1	11	25	1211000	3	835.753	2505.24	0	0.86	57.41	5215	5215	MS2	38/88	38	88	EAH4.RAW
High	A	2	DLQDDFMGGAEIIKSDPVVSFR	17258	Unambiguous	genomic_reference:SL2.31ch08 evidence_code:10F0H1E1IEG gene_region:49546658-49549476 functional_description:"Elongation factor EF-2 (AHRD V1 **** Q9SGT4_ARATH); contains Interpro domain(s) IPR000795 Protein synthesis factor, GTP-binding "	2	1	Solyc08g062920.1.1		CID	1	0	1	1	0	2.33e-08	662	664	3.94	0	1632.85	1	8	25	993000	3	813.733	2439.19	0	-0.15	62.86	5592	5592	MS2	38/84	38	84	AC1.RAW
High	H	2	VGDESYESFSAEKEAILSSLAR	15616	Unambiguous	genomic_reference:SL2.31ch06 evidence_code:10F0H1E1IEG gene_region:36234655-36238685 functional_description:"Alanine aminotransferase (AHRD V1 **** Q6VEJ5_CAPAN); contains Interpro domain(s) IPR004839 Aminotransferase, class I and II "	1	1	Solyc06g063090.1.1		CID	1	0	1	1	0	1.49e-06	646	660	4.23	0	2462.91	1	20	25	749300	3	796.726	2388.16	0	3.1	56.76	5190	5190	MS2	38/84	38	84	EAC3_150410225534.RAW
High	B	2	LYmEARPmEEGLAEAIDEGR	9460	Unambiguous	genomic_reference:SL2.31ch08 evidence_code:10F0H1E1IEG gene_region:49546658-49549476 functional_description:"Elongation factor EF-2 (AHRD V1 **** Q9SGT4_ARATH); contains Interpro domain(s) IPR000795 Protein synthesis factor, GTP-binding "	2	1	Solyc08g062920.1.1	M3(Oxidation); M8(Oxidation)	CID	1	0	1	1	0	6.92e-09	414	439	4.37	0	2579.77	0	2	13	3251000	3	771.356	2312.05	0	0.25	34.2	3199	3199	MS2	38/76	38	76	AC2.RAW
High	B	2	FDDGLPPILTALEVLDNQIR	21890	Unambiguous	genomic_reference:SL2.31ch04 evidence_code:10F1H1E1IEG gene_region:1237570-1241219 functional_description:"ATP synthase subunit beta (AHRD V1 ***- O82722_NICSY); contains Interpro domain(s) IPR005722 ATPase, F1 complex, beta subunit "	1	1	Solyc04g007550.1.1		CID	1	0	1	1	0	2.33e-10	415	378	3.87	0	1764.69	0	1	25	1239000	3	747.071	2239.2	0	0.55	94.58	8287	8287	MS2	38/76	38	76	AC2.RAW
High	J	2	TTGIVLDSGDGVSHTVPIYEGYALPHAILR	15317	Unambiguous	genomic_reference:SL2.31ch03 evidence_code:10F1H1E1IEG gene_region:44382119-44383552 functional_description:"Actin (AHRD V1 ***- Q7XZJ2_GOSHI); contains Interpro domain(s) IPR004000 Actin/actin-like "|genomic_reference:SL2.31ch10 evidence_code:10F1H1E1IEG gene_region:61080001-61081737 functional_description:"Actin (AHRD V1 ***- B5M4V6_TOBAC); contains Interpro domain(s) IPR004000 Actin/actin-like…	8	3	Solyc03g078400.1.1;Solyc01g104770.1.1;Solyc10g086460.1.1		CID	1	0	1	1	0	0.000579	453	439	4.29	0	761.23	0	8	7	3446000	4	788.666	3151.64	0	0.35	55.72	5206	5206	MS2	38/174	38	174	EAH1.RAW
High	G	2	VNVADVNVPVVGGHAGVTILPLFSQATPSANLSSEDIQALTK	63137	Unambiguous	genomic_reference:SL2.31ch12 evidence_code:10F1H1E1IEG gene_region:5028935-5033187 functional_description:"Malate dehydrogenase (AHRD V1 ***- Q8L5C9_SOLTU); contains Interpro domain(s) IPR010097 Malate dehydrogenase, NAD-dependent, eukaryotes and gamma proteobacteria "	1	1	Solyc12g014180.1.1		CID	1	0	1	1	0	3.67e-15	171	155	4.78	0	777.87	0	0	25	654100	3	1410.42	4229.25	0	1.16	68.88	6155	6155	MS2	38/164	38	164	EAC2.RAW
High	G	2	WNYDGSSTGQASGEDSEVILYPQAIFKDPFR	18035	Unambiguous	genomic_reference:SL2.31ch05 evidence_code:10F0H1E1IEG gene_region:60677361-60680424 functional_description:"Glutamine synthetase (AHRD V1 ***- A9PB10_POPTR); contains Interpro domain(s) IPR008146 Glutamine synthetase, catalytic region "	1	1	Solyc05g051250.1.1		CID	1	0	1	1	0	3.15e-16	604	577	5.08	0	1639.44	1	0	25	835200	3	1159.88	3477.63	0	0.99	64.56	5799	5799	MS2	38/120	38	120	EAC2.RAW
High	J	2	VLRPGGYFAYSSPEAYAQDEEDLR	12824	Unambiguous	genomic_reference:SL2.31ch09 evidence_code:10F1H1E1IEG gene_region:65090248-65093777 functional_description:"Dehydration-responsive protein-like (AHRD V1 **-- Q653G1_ORYSJ); contains Interpro domain(s) IPR004159 Protein of unknown function DUF248, methyltransferase putative "	2	1	Solyc09g090190.1.1		CID	1	0	1	1	0	0.00035	560	559	4.4	0	2357.43	0	0	25	1486000	3	911.764	2733.28	0	-0.47	47.37	4484	4484	MS2	37/92	37	92	EAH1.RAW
High	C	2	KYGQDATNVGDEGGFAPNIQENK	6991	Unambiguous	genomic_reference:SL2.31ch09 evidence_code:10F1H1E1IEG gene_region:2371333-2375783 functional_description:"Enolase (AHRD V1 ***- C5J0G6_TOBAC); contains Interpro domain(s) IPR000941 Enolase "|genomic_reference:SL2.31ch10 evidence_code:10F1H1E1IEG gene_region:63994775-63999383 functional_description:"Enolase (AHRD V1 ***- C5J0G6_TOBAC); contains Interpro domain(s) IPR000941 Enolase "	2	2	Solyc09g009020.1.1;Solyc10g085550.1.1		CID	1	0	1	1	0	1.38e-10	554	502	5.06	0	1386.8	1	7	25	1212000	3	818.051	2452.14	0	-0.23	25.33	2397	2397	MS2	37/88	37	88	AC3.RAW
High	C	2	FLLDDVYRNPGPLQFDGPGADAK	15277	Unambiguous	genomic_reference:SL2.31ch12 evidence_code:10F1H1E1IEG gene_region:63232222-63238853 functional_description:"Diphosphate--fructose-6-phosphate 1-phosphotransferase (AHRD V1 ***- C8PT93_9SPIO); contains Interpro domain(s) IPR011183 Pyrophosphate-dependent phosphofructokinase PfpB "	2	1	Solyc12g095760.1.1		CID	1	0	1	1	0	7.57e-11	719	723	5.88	0	2332.26	1	6	22	1633000	3	835.752	2505.24	0	0.56	54.02	4860	4860	MS2	37/88	37	88	AC3.RAW
High	G	2	GLLGDKANLSIYDPQVSEDQIQR	12279	Unambiguous	genomic_reference:SL2.31ch02 evidence_code:10F0H1E1IEG gene_region:31886439-31888009 functional_description:"UDP-D-glucose dehydrogenase (AHRD V1 ***- D2WK25_GOSHI); contains Interpro domain(s) IPR014028 UDP-glucose/GDP-mannose dehydrogenase, dimerisation and substrate-binding "	1	1	Solyc02g067080.1.1		CID	1	0	1	1	0	3.15e-16	634	657	4.75	0	2263.58	1	11	20	1769000	3	853.773	2559.31	0	0.07	42.09	3929	3929	MS2	37/88	37	88	EAC2.RAW
High	J	2	AILGESNEFVGDKVAYALSQGLK	16917	Unambiguous	genomic_reference:SL2.31ch04 evidence_code:10F0H1E1IEG gene_region:3944492-3948735 functional_description:"Triosephosphate isomerase (AHRD V1 **** Q38JI4_SOLTU); contains Interpro domain(s) IPR000652 Triosephosphate isomerase "	1	1	Solyc04g011510.1.1		CID	1	0	1	1	0	0.000173	428	410	4.92	0	1946.41	1	42	14	2324000	3	803.762	2409.27	0	1.86	61.94	5737	5737	MS2	37/88	37	88	EAH1.RAW
High	J	2	AVLDPADPLGFLQAAFEFVGR	22215	Unambiguous	genomic_reference:SL2.31ch03 evidence_code:10F1H1E1IEG gene_region:46784322-46788425 functional_description:"Nuclear movement protein nudc (AHRD V1 *-*- Q17KI6_AEDAE); contains Interpro domain(s) IPR017447 CS "	1	1	Solyc03g083390.1.1		CID	1	0	1	1	0	4.25e-05	520	498	4.72	0	1721.69	0	11	25	155000	3	745.062	2233.17	0	2.6	98.38	8762	8762	MS2	37/80	37	80	EAH1.RAW
High	A	2	FDDGLPPILTALEVLDNQIR	21890	Unambiguous	genomic_reference:SL2.31ch04 evidence_code:10F1H1E1IEG gene_region:1237570-1241219 functional_description:"ATP synthase subunit beta (AHRD V1 ***- O82722_NICSY); contains Interpro domain(s) IPR005722 ATPase, F1 complex, beta subunit "	1	1	Solyc04g007550.1.1		CID	1	0	1	1	0	5.98e-09	407	371	4.42	0	1787.25	0	1	25	1910000	3	747.071	2239.2	0	0.63	95.81	8301	8301	MS2	37/76	37	76	AC1.RAW
High	C	2	LYmEARPmEEGLAEAIDEGR	9460	Unambiguous	genomic_reference:SL2.31ch08 evidence_code:10F0H1E1IEG gene_region:49546658-49549476 functional_description:"Elongation factor EF-2 (AHRD V1 **** Q9SGT4_ARATH); contains Interpro domain(s) IPR000795 Protein synthesis factor, GTP-binding "	2	1	Solyc08g062920.1.1	M3(Oxidation); M8(Oxidation)	CID	1	0	1	1	0	1.72e-09	415	436	4.67	0	2193.49	0	5	10	6147000	3	771.356	2312.05	0	0.02	33.36	3117	3117	MS2	37/76	37	76	AC3.RAW
High	C	2	EAPAFVEQATEQQILVTGIK	14533	Unambiguous	genomic_reference:SL2.31ch04 evidence_code:10F1H1E1IEG gene_region:1237570-1241219 functional_description:"ATP synthase subunit beta (AHRD V1 ***- O82722_NICSY); contains Interpro domain(s) IPR005722 ATPase, F1 complex, beta subunit "|genomic_reference:SL2.31ch05 evidence_code:10F1H1E1IEG gene_region:2806055-2809657 functional_description:"ATP synthase subunit beta (AHRD V1 ***- O82722_NICSY); co…	2	2	Solyc04g007550.1.1;Solyc05g008460.1.1		CID	1	0	1	1	0	1.63e-08	467	421	4.38	0	2233.13	0	74	17	3519000	3	724.723	2172.16	0	0.47	51.5	4651	4651	MS2	37/76	37	76	AC3.RAW
High	F	2	LYmEARPmEEGLAEAIDEGR	9460	Unambiguous	genomic_reference:SL2.31ch08 evidence_code:10F0H1E1IEG gene_region:49546658-49549476 functional_description:"Elongation factor EF-2 (AHRD V1 **** Q9SGT4_ARATH); contains Interpro domain(s) IPR000795 Protein synthesis factor, GTP-binding "	2	1	Solyc08g062920.1.1	M3(Oxidation); M8(Oxidation)	CID	1	0	1	1	0	5.14e-14	416	442	4.73	0	2260.96	0	6	22	1633000	3	771.356	2312.05	0	0.18	36.13	3423	3423	MS2	37/76	37	76	AH4.RAW
High	K	2	LYmEARPmEEGLAEAIDEGR	9460	Unambiguous	genomic_reference:SL2.31ch08 evidence_code:10F0H1E1IEG gene_region:49546658-49549476 functional_description:"Elongation factor EF-2 (AHRD V1 **** Q9SGT4_ARATH); contains Interpro domain(s) IPR000795 Protein synthesis factor, GTP-binding "	2	1	Solyc08g062920.1.1	M3(Oxidation); M8(Oxidation)	CID	1	0	1	1	0	8.31e-10	411	440	4.72	0	2148.14	0	19	9	5155000	3	771.357	2312.06	0	0.89	33.79	3193	3193	MS2	37/76	37	76	EAH2.RAW
High	B	2	LVSQKFEDPAEGEDVLVGK	9627	Unambiguous	genomic_reference:SL2.31ch12 evidence_code:10F1H1E1IEG gene_region:47132509-47140184 functional_description:"V-type ATP synthase alpha chain (AHRD V1 ***- VATA_METTH); contains Interpro domain(s) IPR005725 ATPase, V1 complex, subunit A "	1	1	Solyc12g055800.1.1		CID	1	0	1	1	0	2.85e-08	637	597	4.52	0	2060.28	1	33	22	1584000	3	687.357	2060.06	0	1.44	34.59	3233	3233	MS2	37/72	37	72	AC2.RAW
High	E	2	LVSQKFEDPAEGEDVLVGK	9627	Unambiguous	genomic_reference:SL2.31ch12 evidence_code:10F1H1E1IEG gene_region:47132509-47140184 functional_description:"V-type ATP synthase alpha chain (AHRD V1 ***- VATA_METTH); contains Interpro domain(s) IPR005725 ATPase, V1 complex, subunit A "	1	1	Solyc12g055800.1.1		CID	1	0	1	1	0	3.62e-05	645	606	4.4	0	2284.62	1	34	25	862000	3	687.358	2060.06	0	1.71	38.51	3535	3535	MS2	37/72	37	72	AH3.RAW
High	A	2	VKDELVLDGNDIELVSR	12186	Unambiguous	genomic_reference:SL2.31ch12 evidence_code:10F1H1E1IEG gene_region:63856222-63858136 functional_description:"Ribosomal L9-like protein (AHRD V1 ***- B3TLR1_ELAGV); contains Interpro domain(s) IPR002359 Ribosomal protein L6, conserved site-2 "	3	1	Solyc12g096700.1.1		CID	1	0	1	1	0	2.67e-08	423	442	5.36	0	2779.81	1	12	25	1259000	3	638.677	1914.02	0	-0.02	43.99	4013	4013	MS2	37/64	37	64	AC1.RAW
High	H	2	QAFDEAIAELDTLGEESYKDSTLImQLLR	21966	Unambiguous	genomic_reference:SL2.31ch04 evidence_code:10F1H1E1IEG gene_region:4428755-4429971 functional_description:"14-3-3 protein beta/alpha-1 (AHRD V1 **-- 143B1_ONCMY); contains Interpro domain(s) IPR000308 14-3-3 protein "|genomic_reference:SL2.31ch04 evidence_code:10F0H1E1IEG gene_region:58093381-58094998 functional_description:"14-3-3 protein beta/alpha-B (AHRD V1 **-- 143BB_XENLA); contains Interpr…	4	4	Solyc04g012120.1.1;Solyc04g074510.1.1;Solyc11g010200.1.1;Solyc12g057110.1.1	M25(Oxidation)	CID	1	0	1	1	0.00031	0.00396	699	694	4.38	0	595.51	1	2	25	179700	4	829.662	3315.63	0	-1.46	95.17	8305	8305	MS2	37/168	37	168	EAC3_150410225534.RAW
High	G	2	LGGAGLDVFENEPEVPEQLFGLENVVLLPHVGSGTEETR	146809	Unambiguous	genomic_reference:SL2.31ch03 evidence_code:10F1H1E1IEG gene_region:63038876-63041179 functional_description:"D-isomer specific 2-hydroxyacid dehydrogenase NAD-binding (AHRD V1 **** C6BAQ7_RHILS); contains Interpro domain(s) IPR006140 D-isomer specific 2-hydroxyacid dehydrogenase, NAD-binding "	1	1	Solyc03g120670.1.1		CID	1	0	1	1	0	3.34e-14	438	494	3.75	0	777.03	0	0	25	277500	3	1383.37	4148.09	0	1.45	80.14	7081	7081	MS2	37/152	37	152	EAC2.RAW
High	F	2	TIDEEVLTNAFAATEQAFLHLVR	43798	Unambiguous	genomic_reference:SL2.31ch10 evidence_code:10F0H1E0IEG gene_region:59818291-59826245 functional_description:"Protein phosphatase 2C (AHRD V1 *-*- B6T5D8_MAIZE); contains Interpro domain(s) IPR015655 Protein phosphatase 2C "	1	1	Solyc10g078800.1.1		CID	1	0	1	1	0.000369	0.00126	597	548	4.16	0	1118.76	0	12	25	94930	4	647.84	2588.34	0	0.56	97.69	8633	8633	MS2	37/132	37	132	AH4.RAW
High	C	2	ILLTSTSEVYGDPLIHPQDESYWGNVNPIGVR	16765	Unambiguous	genomic_reference:SL2.31ch04 evidence_code:10F1H1E1IEG gene_region:3868903-3871560 functional_description:"UDP-glucose 4-epimerase (AHRD V1 **-* D5RML8_9PROT); contains Interpro domain(s) IPR016040 NAD(P)-binding domain "	1	1	Solyc04g011400.1.1		CID	1	0	1	1	0	7.02e-08	587	594	4.59	0	1281.95	0	0	25	1591000	3	1190.6	3569.8	0	1.13	61.43	5468	5468	MS2	37/124	37	124	AC3.RAW
High	C	2	APNLSNVISKPEPSTVAQDDEDVDETGVEPK	10174	Unambiguous	genomic_reference:SL2.31ch10 evidence_code:10F0H1E1IEG gene_region:61533717-61537084 functional_description:"Nascent polypeptide-associated complex alpha subunit-like protein (AHRD V1 ***- B6T903_MAIZE); contains Interpro domain(s) IPR016641 Nascent polypeptide-associated complex, alpha subunit "	2	1	Solyc10g081030.1.1		CID	1	0	1	1	0	9.72e-08	677	678	5.51	0	1653.81	0	6	25	922800	3	1094.2	3280.58	0	2.73	35.97	3344	3344	MS2	37/120	37	120	AC3.RAW
High	K	2	TTGIVLDSGDGVSHTVPIYEGYALPHAILR	15317	Unambiguous	genomic_reference:SL2.31ch03 evidence_code:10F1H1E1IEG gene_region:44382119-44383552 functional_description:"Actin (AHRD V1 ***- Q7XZJ2_GOSHI); contains Interpro domain(s) IPR004000 Actin/actin-like "|genomic_reference:SL2.31ch10 evidence_code:10F1H1E1IEG gene_region:61080001-61081737 functional_description:"Actin (AHRD V1 ***- B5M4V6_TOBAC); contains Interpro domain(s) IPR004000 Actin/actin-like…	8	3	Solyc03g078400.1.1;Solyc01g104770.1.1;Solyc10g086460.1.1		CID	1	0	1	1	0	3.3e-08	472	452	5.67	0	1309.59	0	0	25	1975000	3	1051.22	3151.64	0	-0.56	55.15	5028	5028	MS2	37/116	37	116	EAH2.RAW
High	G	2	HEELPIPIFSDLEPVYGSGSQLEEAQLR	18733	Unambiguous	genomic_reference:SL2.31ch01 evidence_code:10F1H1E1IEG gene_region:59253489-59258973 functional_description:"Galactokinase (AHRD V1 **** B6V3B9_CUCME); contains Interpro domain(s) IPR000705 Galactokinase "	1	1	Solyc01g058390.1.1		CID	1	0	1	1	0	0.000535	584	596	5.55	0	1190.58	0	28	25	0	3	1051.87	3153.6	0.01	7.37	67.91	6076	6076	MS2	37/108	37	108	EAC2.RAW
High	K	2	LTDGTVFDSSYERNDPIEFELGSGQVIK	15353	Unambiguous	genomic_reference:SL2.31ch09 evidence_code:10F1H0E1IEG gene_region:45727592-45731649 functional_description:"FK506-binding protein 2 (EC 5.2.1.8)(Peptidyl-prolyl cis-trans isomerase)(PPIase)(Rotamase) (AHRD V1 **-* C8VE36_EMENI); contains Interpro domain(s) IPR001179 Peptidyl-prolyl cis-trans isomerase, FKBP-type "	1	1	Solyc09g057670.1.1		CID	1	0	1	1	0	1.01e-05	753	733	4.87	0	1830.79	1	0	25	1521000	3	1039.51	3116.51	0	0.81	55.07	5021	5021	MS2	37/108	37	108	EAH2.RAW
High	K	2	DKPLPSWSDSDVEEFIASDPLHGPTLR	17453	Unambiguous	genomic_reference:SL2.31ch06 evidence_code:10F1H1E1IEG gene_region:42013245-42016680 functional_description:"Unknown Protein (AHRD V1)"	1	1	Solyc06g073900.1.1		CID	1	0	1	1	0	2.97e-08	712	701	4.95	0	990.22	0	14	25	884700	3	1003.49	3008.47	0	0.94	63.3	5717	5717	MS2	37/104	37	104	EAH2.RAW
High	K	2	WFDTNYHFIVPELGPDVNFSYASHK	17791	Unambiguous	genomic_reference:SL2.31ch10 evidence_code:10F1H1E1IEG gene_region:61889662-61892937 functional_description:"5-methyltetrahydropteroyltriglutamate--homocysteine methyltransferase (AHRD V1 ***- B6UF55_MAIZE); contains Interpro domain(s) IPR006276 5-methyltetrahydropteroyltriglutamate--homocysteine S-methyltransferase "	1	1	Solyc10g081510.1.1		CID	1	0	1	1	0	9.09e-08	637	599	4.93	0	1393.09	0	4	25	800700	3	995.14	2983.41	0	0.14	64.67	5832	5832	MS2	36/96	36	96	EAH2.RAW
High	A	2	FLLDDVYRNPGPLQFDGPGADAK	15277	Unambiguous	genomic_reference:SL2.31ch12 evidence_code:10F1H1E1IEG gene_region:63232222-63238853 functional_description:"Diphosphate--fructose-6-phosphate 1-phosphotransferase (AHRD V1 ***- C8PT93_9SPIO); contains Interpro domain(s) IPR011183 Pyrophosphate-dependent phosphofructokinase PfpB "	2	1	Solyc12g095760.1.1		CID	1	0	1	1	0	5.14e-11	701	710	4.98	0	2295.96	1	21	25	1005000	3	835.753	2505.24	0	1.08	54.96	4935	4935	MS2	36/88	36	88	AC1.RAW
High	B	2	KYGQDATNVGDEGGFAPNIQENK	6991	Unambiguous	genomic_reference:SL2.31ch09 evidence_code:10F1H1E1IEG gene_region:2371333-2375783 functional_description:"Enolase (AHRD V1 ***- C5J0G6_TOBAC); contains Interpro domain(s) IPR000941 Enolase "|genomic_reference:SL2.31ch10 evidence_code:10F1H1E1IEG gene_region:63994775-63999383 functional_description:"Enolase (AHRD V1 ***- C5J0G6_TOBAC); contains Interpro domain(s) IPR000941 Enolase "	2	2	Solyc09g009020.1.1;Solyc10g085550.1.1		CID	1	0	1	1	0	1.46e-10	552	504	4.97	0	1231.14	1	11	25	967400	3	818.05	2452.14	0	-0.31	26.01	2468	2468	MS2	36/88	36	88	AC2.RAW
High	D	2	AILGESNEFVGDKVAYALSQGLK	16917	Unambiguous	genomic_reference:SL2.31ch04 evidence_code:10F0H1E1IEG gene_region:3944492-3948735 functional_description:"Triosephosphate isomerase (AHRD V1 **** Q38JI4_SOLTU); contains Interpro domain(s) IPR000652 Triosephosphate isomerase "	1	1	Solyc04g011510.1.1		CID	1	0	1	1	0	3.66e-08	485	461	4.54	0	1638.27	1	34	25	1134000	3	803.76	2409.26	0	-0.58	60.15	5336	5336	MS2	36/88	36	88	AH2.RAW
High	F	2	FLLDDVYRNPGPLQFDGPGADAK	15277	Unambiguous	genomic_reference:SL2.31ch12 evidence_code:10F1H1E1IEG gene_region:63232222-63238853 functional_description:"Diphosphate--fructose-6-phosphate 1-phosphotransferase (AHRD V1 ***- C8PT93_9SPIO); contains Interpro domain(s) IPR011183 Pyrophosphate-dependent phosphofructokinase PfpB "	2	1	Solyc12g095760.1.1		CID	1	0	1	1	0	1.07e-14	714	717	4.76	0	2059.73	1	5	25	734300	3	835.753	2505.24	0	0.78	57.38	5252	5252	MS2	36/88	36	88	AH4.RAW
High	F	2	IYPGGAFDPLGLADDPEAFAELK	41073	Unambiguous	genomic_reference:SL2.31ch07 evidence_code:10F1H1E1IEG gene_region:56406549-56407460 functional_description:"Chlorophyll a-b binding protein 4, chloroplastic (AHRD V1 **** CB24_SOLLC); contains Interpro domain(s) IPR001344 Chlorophyll A-B binding protein "	2	1	Solyc07g047850.1.1		CID	1	0	1	1	0	2.58e-11	760	667	4.51	0	2068.88	0	13	25	53240	3	802.732	2406.18	0	-2.72	74.89	6697	6697	MS2	36/88	36	88	AH4.RAW
High	A	2	VGLDVAEAQHLMDGLDWQGAVK	14358	Unambiguous	genomic_reference:SL2.31ch05 evidence_code:10F0H1E1IEG gene_region:55518326-55523602 functional_description:"Carboxymethylenebutenolidase-like protein (AHRD V1 ***- Q8LQS5_ORYSJ); contains Interpro domain(s) IPR002925 Dienelactone hydrolase "	1	1	Solyc05g043430.1.1		CID	1	0	1	1	0	5.41e-10	611	606	5.11	0	2194.21	0	14	25	740800	3	784.725	2352.16	0	-1.59	63.93	5683	5683	MS2	36/84	36	84	AC1.RAW
High	C	2	AGEDYDGGRDADDFVNFINEK	56765	Unambiguous	genomic_reference:SL2.31ch01 evidence_code:10F1H1E1IEG gene_region:82147812-82153647 functional_description:"Thioredoxin/protein disulfide isomerase (AHRD V1 **** Q2U681_ASPOR); contains Interpro domain(s) IPR005788 Disulphide isomerase "	1	1	Solyc01g100320.1.1		CID	1	0	1	1	0	3.85e-08	226	202	4.26	0	2045.81	1	21	25	771800	3	783.008	2347.01	0	-0.61	45.42	4147	4147	MS2	36/80	36	80	AC3.RAW
High	G	2	APmIDNPDFKDDPDLYVFPK	13140	Unambiguous	genomic_reference:SL2.31ch01 evidence_code:10F0H1E1IEG gene_region:82189196-82192436 functional_description:"Calreticulin 2 calcium-binding protein (AHRD V1 **** A8HMC0_CHLRE); contains Interpro domain(s) IPR009169 Calreticulin "	1	1	Solyc01g100380.1.1	M3(Oxidation)	CID	1	0	1	1	0	3.15e-16	584	582	5.2	0	2618.34	1	36	11	3418000	3	785.04	2353.11	0	0.45	45.12	4183	4183	MS2	36/76	36	76	EAC2.RAW
High	I	2	FDDGLPPILTALEVLDNQIR	21890	Unambiguous	genomic_reference:SL2.31ch04 evidence_code:10F1H1E1IEG gene_region:1237570-1241219 functional_description:"ATP synthase subunit beta (AHRD V1 ***- O82722_NICSY); contains Interpro domain(s) IPR005722 ATPase, F1 complex, beta subunit "	1	1	Solyc04g007550.1.1		CID	1	0	1	1	0	2.87e-08	432	402	3.51	0	1467.64	0	4	25	645900	3	747.071	2239.2	0	0.22	93.97	8444	8444	MS2	36/76	36	76	EAC4_150411011441.RAW
High	K	2	HVEIIEAIDEELVHEIVSK	214355	Unambiguous	genomic_reference:SL2.31ch03 evidence_code:10F0H1E1IEG gene_region:38800465-38808751 functional_description:"Phosphorylase (AHRD V1 **** B9SJB6_RICCO); contains Interpro domain(s) IPR011833 Glycogen/starch/alpha-glucan phosphorylase "	1	1	Solyc03g065340.1.1		CID	1	0	1	1	0	3.17e-11	445	472	5.31	0	1800.12	0	40	25	137200	3	734.727	2202.17	0	0.9	73.75	6590	6590	MS2	36/72	36	72	EAH2.RAW
High	B	2	LLEVDPDGAILAIGDmmR	14760	Unambiguous	genomic_reference:SL2.31ch11 evidence_code:10F1H1E1IEG gene_region:2859715-2863853 functional_description:"Acyl- (AHRD V1 ***- Q4JIJ4_9ROSI); contains Interpro domain(s) IPR005067 Fatty acid desaturase, type 2 "	1	1	Solyc11g008680.1.1	M16(Oxidation); M17(Oxidation)	CID	1	0	1	1	0	5.87e-08	671	618	3.86	0	2109.64	0	6	25	1200000	3	654.329	1960.97	0	0.78	52.49	4757	4757	MS2	36/68	36	68	AC2.RAW
High	B	2	VFEVSLADLQKDEDQAFR	15460	Unambiguous	genomic_reference:SL2.31ch03 evidence_code:10F1H1E1IEG gene_region:53730005-53732068 functional_description:"40S ribosomal protein S1 (AHRD V1 ***- RS3A_LENED); contains Interpro domain(s) IPR001593 Ribosomal protein S3Ae "|genomic_reference:SL2.31ch06 evidence_code:10F1H1E1IEG gene_region:41101725-41104317 functional_description:"40S ribosomal protein S1 (AHRD V1 ***- RS3A_LACBS); contains Inter…	2	2	Solyc03g097900.1.1;Solyc06g072490.1.1		CID	1	0	1	1	0	4.22e-07	633	635	3.72	0	1726.84	1	6	24	1636000	3	704.02	2110.05	0	0.13	54.8	4949	4949	MS2	36/68	36	68	AC2.RAW
High	C	2	VKDELVLDGNDIELVSR	12186	Unambiguous	genomic_reference:SL2.31ch12 evidence_code:10F1H1E1IEG gene_region:63856222-63858136 functional_description:"Ribosomal L9-like protein (AHRD V1 ***- B3TLR1_ELAGV); contains Interpro domain(s) IPR002359 Ribosomal protein L6, conserved site-2 "	3	1	Solyc12g096700.1.1		CID	1	0	1	1	0	1.14e-09	422	442	4.58	0	2592.17	1	67	25	476100	3	638.677	1914.02	0	-0.11	42.8	3929	3929	MS2	36/64	36	64	AC3.RAW
High	K	2	KYGQDATNVGDEGGFAPNIQENKEGLELLK	207827	Unambiguous	genomic_reference:SL2.31ch09 evidence_code:10F1H1E1IEG gene_region:2371333-2375783 functional_description:"Enolase (AHRD V1 ***- C5J0G6_TOBAC); contains Interpro domain(s) IPR000941 Enolase "|genomic_reference:SL2.31ch10 evidence_code:10F1H1E1IEG gene_region:63994775-63999383 functional_description:"Enolase (AHRD V1 ***- C5J0G6_TOBAC); contains Interpro domain(s) IPR000941 Enolase "	2	2	Solyc09g009020.1.1;Solyc10g085550.1.1		CID	1	0	1	1	0	2.1e-07	704	644	4.14	0	585.1	2	8	25	775200	4	809.403	3234.59	0	-0.16	43	3995	3995	MS2	36/174	36	174	EAH2.RAW
High	F	2	SSSmFDPFSIDVFDPFRELGFPSTNSGESSAFANTR	124599	Unambiguous	genomic_reference:SL2.31ch06 evidence_code:10F1H1E1IEG gene_region:43938526-43938990 functional_description:"class I heat shock protein (AHRD V1 ***- Q69BI7_CARPA); contains Interpro domain(s) IPR002068 Heat shock protein Hsp20 "	1	1	Solyc06g076520.1.1	M4(Oxidation)	CID	1	0	1	1	0	3.64e-09	402	359	4.51	0	740.82	1	0	25	274100	3	1321.59	3962.77	0	-3.2	87.2	7715	7715	MS2	36/140	36	140	AH4.RAW
High	D	2	WNYDGSSTGQASGEDSEVILYPQAIFKDPFR	18035	Unambiguous	genomic_reference:SL2.31ch05 evidence_code:10F0H1E1IEG gene_region:60677361-60680424 functional_description:"Glutamine synthetase (AHRD V1 ***- A9PB10_POPTR); contains Interpro domain(s) IPR008146 Glutamine synthetase, catalytic region "	1	1	Solyc05g051250.1.1		CID	1	0	1	1	0	9.42e-06	601	576	4.64	0	1117.37	1	0	25	1028000	3	1159.88	3477.63	0	1.09	65.28	5761	5761	MS2	36/120	36	120	AH2.RAW
High	H	2	APNLSNVISKPEPSTVAQDDEDVDETGVEPK	10174	Unambiguous	genomic_reference:SL2.31ch10 evidence_code:10F0H1E1IEG gene_region:61533717-61537084 functional_description:"Nascent polypeptide-associated complex alpha subunit-like protein (AHRD V1 ***- B6T903_MAIZE); contains Interpro domain(s) IPR016641 Nascent polypeptide-associated complex, alpha subunit "	2	1	Solyc10g081030.1.1		CID	1	0	1	1	0	2.93e-06	680	682	5.44	0	1639.82	0	6	25	1064000	3	1094.2	3280.58	0	1.39	37.17	3506	3506	MS2	36/120	36	120	EAC3_150410225534.RAW
High	I	2	WNYDGSSTGQASGEDSEVILYPQAIFKDPFR	18035	Unambiguous	genomic_reference:SL2.31ch05 evidence_code:10F0H1E1IEG gene_region:60677361-60680424 functional_description:"Glutamine synthetase (AHRD V1 ***- A9PB10_POPTR); contains Interpro domain(s) IPR008146 Glutamine synthetase, catalytic region "	1	1	Solyc05g051250.1.1		CID	1	0	1	1	0	9.25e-07	590	566	4.96	0	1158.47	1	0	25	550500	3	1159.88	3477.63	0	0.67	65.57	5937	5937	MS2	36/120	36	120	EAC4_150411011441.RAW
High	J	2	WNYDGSSTGQASGEDSEVILYPQAIFKDPFR	18035	Unambiguous	genomic_reference:SL2.31ch05 evidence_code:10F0H1E1IEG gene_region:60677361-60680424 functional_description:"Glutamine synthetase (AHRD V1 ***- A9PB10_POPTR); contains Interpro domain(s) IPR008146 Glutamine synthetase, catalytic region "	1	1	Solyc05g051250.1.1		CID	1	0	1	1	0	0.000179	616	584	5.46	0	1112.06	1	6	25	1255000	3	1159.89	3477.64	0.01	5.09	66.61	6129	6129	MS2	36/120	36	120	EAH1.RAW
High	C	2	TTGIVLDSGDGVSHTVPIYEGYALPHAILR	15317	Unambiguous	genomic_reference:SL2.31ch03 evidence_code:10F1H1E1IEG gene_region:44382119-44383552 functional_description:"Actin (AHRD V1 ***- Q7XZJ2_GOSHI); contains Interpro domain(s) IPR004000 Actin/actin-like "|genomic_reference:SL2.31ch10 evidence_code:10F1H1E1IEG gene_region:61080001-61081737 functional_description:"Actin (AHRD V1 ***- B5M4V6_TOBAC); contains Interpro domain(s) IPR004000 Actin/actin-like…	8	3	Solyc03g078400.1.1;Solyc01g104770.1.1;Solyc10g086460.1.1		CID	1	0	1	1	0	1.61e-07	448	434	4.66	0	1281.71	0	0	25	898300	3	1051.22	3151.64	0	0.83	53.86	4847	4847	MS2	36/116	36	116	AC3.RAW
High	J	2	TTGIVLDSGDGVSHTVPIYEGYALPHAILR	15317	Unambiguous	genomic_reference:SL2.31ch03 evidence_code:10F1H1E1IEG gene_region:44382119-44383552 functional_description:"Actin (AHRD V1 ***- Q7XZJ2_GOSHI); contains Interpro domain(s) IPR004000 Actin/actin-like "|genomic_reference:SL2.31ch10 evidence_code:10F1H1E1IEG gene_region:61080001-61081737 functional_description:"Actin (AHRD V1 ***- B5M4V6_TOBAC); contains Interpro domain(s) IPR004000 Actin/actin-like…	8	3	Solyc03g078400.1.1;Solyc01g104770.1.1;Solyc10g086460.1.1		CID	1	0	1	1	0	0.000112	451	437	5.65	0	1323.79	0	6	25	1635000	3	1051.22	3151.64	0	0.25	55.63	5198	5198	MS2	36/116	36	116	EAH1.RAW
High	J	2	YGQDATNVGDEGGFAPNIQENKEGLELLK	12881	Unambiguous	genomic_reference:SL2.31ch09 evidence_code:10F1H1E1IEG gene_region:2371333-2375783 functional_description:"Enolase (AHRD V1 ***- C5J0G6_TOBAC); contains Interpro domain(s) IPR000941 Enolase "|genomic_reference:SL2.31ch10 evidence_code:10F1H1E1IEG gene_region:63994775-63999383 functional_description:"Enolase (AHRD V1 ***- C5J0G6_TOBAC); contains Interpro domain(s) IPR000941 Enolase "	2	2	Solyc09g009020.1.1;Solyc10g085550.1.1		CID	1	0	1	1	0	2.41e-05	657	716	5.5	0	986.97	1	4	25	6614000	3	1036.17	3106.5	0	0.64	47.66	4509	4509	MS2	36/112	36	112	EAH1.RAW
High	J	2	LTDGTVFDSSYERNDPIEFELGSGQVIK	15353	Unambiguous	genomic_reference:SL2.31ch09 evidence_code:10F1H0E1IEG gene_region:45727592-45731649 functional_description:"FK506-binding protein 2 (EC 5.2.1.8)(Peptidyl-prolyl cis-trans isomerase)(PPIase)(Rotamase) (AHRD V1 **-* C8VE36_EMENI); contains Interpro domain(s) IPR001179 Peptidyl-prolyl cis-trans isomerase, FKBP-type "	1	1	Solyc09g057670.1.1		CID	1	0	1	1	0	0.000234	754	733	4.78	0	1404.97	1	4	25	1550000	3	1039.51	3116.51	0	0.81	56.2	5248	5248	MS2	36/108	36	108	EAH1.RAW
High	G	2	DKPLPSWSDSDVEEFIASDPLHGPTLR	17453	Unambiguous	genomic_reference:SL2.31ch06 evidence_code:10F1H1E1IEG gene_region:42013245-42016680 functional_description:"Unknown Protein (AHRD V1)"	1	1	Solyc06g073900.1.1		CID	1	0	1	1	0	3.15e-16	708	707	4.3	0	953.09	0	12	25	1868000	3	1003.49	3008.46	0	0.39	62.31	5615	5615	MS2	36/104	36	104	EAC2.RAW
High	J	2	SSHLPLTQYDNAmDTDSLNPGEQIFEK	12722	Unambiguous	genomic_reference:SL2.31ch06 evidence_code:10F0H1E1IEG gene_region:38097754-38102045 functional_description:"Hexokinase (AHRD V1 ***- Q9FR27_SOLLC); contains Interpro domain(s) IPR001312 Hexokinase "	1	1	Solyc06g066440.1.1	M13(Oxidation)	CID	1	0	1	1	0	2.35e-05	566	541	5.25	0	1151.06	0	11	25	773400	3	1022.81	3066.41	0	3.13	46.89	4442	4442	MS2	36/104	36	104	EAH1.RAW
High	G	2	VDKGTVELPGTDGETTTQGLDGLAER	10517	Unambiguous	genomic_reference:SL2.31ch09 evidence_code:10F0H1E1IEG gene_region:2645029-2646904 functional_description:"Fructose-bisphosphate aldolase (AHRD V1 ***- Q2PYX3_SOLTU); contains Interpro domain(s) IPR000741 Fructose-bisphosphate aldolase, class-I "	1	1	Solyc09g009260.1.1		CID	1	0	1	1	0	3.15e-16	643	626	6.43	0	1363.73	1	6	25	4012000	3	887.107	2659.31	0	0.22	35.95	3399	3399	MS2	36/100	36	100	EAC2.RAW
High	J	2	VDKGTVELPGTDGETTTQGLDGLAER	10517	Unambiguous	genomic_reference:SL2.31ch09 evidence_code:10F0H1E1IEG gene_region:2645029-2646904 functional_description:"Fructose-bisphosphate aldolase (AHRD V1 ***- Q2PYX3_SOLTU); contains Interpro domain(s) IPR000741 Fructose-bisphosphate aldolase, class-I "	1	1	Solyc09g009260.1.1		CID	1	0	1	1	0	6.76e-07	649	647	6.52	0	1062.94	1	2	25	6784000	3	887.107	2659.31	0	0.42	39.52	3795	3795	MS2	36/100	36	100	EAH1.RAW
High	D	2	WFDTNYHFIVPELGPDVNFSYASHK	17791	Unambiguous	genomic_reference:SL2.31ch10 evidence_code:10F1H1E1IEG gene_region:61889662-61892937 functional_description:"5-methyltetrahydropteroyltriglutamate--homocysteine methyltransferase (AHRD V1 ***- B6UF55_MAIZE); contains Interpro domain(s) IPR006276 5-methyltetrahydropteroyltriglutamate--homocysteine S-methyltransferase "	1	1	Solyc10g081510.1.1		CID	1	0	1	1	0	1.87e-08	649	629	4.66	0	1426.19	0	10	25	869600	3	995.14	2983.41	0	0.63	64.12	5666	5666	MS2	35/96	35	96	AH2.RAW
High	B	2	LSQPNPDDLGHVDSVSVEEIGGVR	33854	Unambiguous	genomic_reference:SL2.31ch01 evidence_code:10F1H1E1IEG gene_region:74679334-74687600 functional_description:"T-complex protein theta subunit (AHRD V1 ***- A8IF08_CHLRE); contains Interpro domain(s) IPR012721 T-complex protein 1, theta subunit "	1	1	Solyc01g088080.1.1		CID	1	0	1	1	0	1.7e-07	681	742	3.82	0	680.85	0	3	25	491000	3	840.418	2519.24	0	1.08	41.81	3855	3855	MS2	35/92	35	92	AC2.RAW
High	I	2	SDVSNVVHADEFEYKDPVDGSVSK	9499	Unambiguous	genomic_reference:SL2.31ch04 evidence_code:10F0H1E1IEG gene_region:31641900-31656873 functional_description:"Phosphoglucomutase (AHRD V1 **** Q9AUQ4_ORYSA); contains Interpro domain(s) IPR016055 Alpha-D-phosphohexomutase, alpha/beta/alpha I, II and III "	1	1	Solyc04g045340.1.1		CID	1	0	1	1	0	4.01e-07	507	561	4.32	0	1555.37	1	6	25	697100	3	875.078	2623.22	0	1.06	35.3	3338	3338	MS2	35/92	35	92	EAC4_150411011441.RAW
High	K	2	FGNIELSPASGILNYGQGLFEGLK	19927	Rejected	genomic_reference:SL2.31ch03 evidence_code:10F0H1E1IEG gene_region:11507825-11514153 functional_description:"Branched-chain amino acid aminotransferase (AHRD V1 **** Q9SNY9_SOLTU); contains Interpro domain(s) IPR005786 Branched-chain amino acid aminotransferase II "	1	0			CID	0.0062	0	1	1	0	1.09e-07	510	531	4.83	0	1631.85	0	14	25	308900	3	842.109	2524.31	0	1.06	75.5	6732	6732	MS2	35/92	35	92	EAH2.RAW
High	G	2	LLDQDNLDLGYDAAKGEYVDMIK	36858	Unambiguous	genomic_reference:SL2.31ch09 evidence_code:10F1H1E1IEG gene_region:65848674-65853705 functional_description:"chaperonin (AHRD V1 ***- Q6N0B9_9PROT); contains Interpro domain(s) IPR001844 Chaperonin Cpn60 "	1	1	Solyc09g091180.1.1		CID	1	0	1	1	0	3.15e-16	666	691	4.12	0	802.83	1	4	25	682000	3	867.092	2599.26	0	0.99	51.64	4730	4730	MS2	35/88	35	88	EAC2.RAW
High	G	2	FLLDDVYRNPGPLQFDGPGADAK	15277	Unambiguous	genomic_reference:SL2.31ch12 evidence_code:10F1H1E1IEG gene_region:63232222-63238853 functional_description:"Diphosphate--fructose-6-phosphate 1-phosphotransferase (AHRD V1 ***- C8PT93_9SPIO); contains Interpro domain(s) IPR011183 Pyrophosphate-dependent phosphofructokinase PfpB "	2	1	Solyc12g095760.1.1		CID	1	0	1	1	0	3.15e-16	719	723	5.38	0	2242.2	1	10	21	1172000	3	835.752	2505.24	0	0.56	53.09	4851	4851	MS2	35/88	35	88	EAC2.RAW
High	G	2	ILDWADVINAHIISGPGIVDGLK	19692	Unambiguous	genomic_reference:SL2.31ch11 evidence_code:10F0H1E1IEG gene_region:50518935-50523650 functional_description:"Orotidine 5&apos-phosphate decarboxylase (Orotate phosphoribosyltransferase) (AHRD V1 **** C4QAV6_SCHMA); contains Interpro domain(s) IPR001754 Orotidine 5'-phosphate decarboxylase, core "	1	1	Solyc11g068830.1.1		CID	1	0	1	1	0	3.15e-16	249	256	4.24	0	769.67	0	4	25	1422000	3	806.113	2416.32	0	0.02	73.24	6515	6515	MS2	35/88	35	88	EAC2.RAW
High	I	2	FLLDDVYRNPGPLQFDGPGADAK	15277	Unambiguous	genomic_reference:SL2.31ch12 evidence_code:10F1H1E1IEG gene_region:63232222-63238853 functional_description:"Diphosphate--fructose-6-phosphate 1-phosphotransferase (AHRD V1 ***- C8PT93_9SPIO); contains Interpro domain(s) IPR011183 Pyrophosphate-dependent phosphofructokinase PfpB "	2	1	Solyc12g095760.1.1		CID	1	0	1	1	0	2.5e-08	709	716	5.17	0	1879.98	1	13	25	820400	3	835.753	2505.24	0	1.15	54.96	5039	5039	MS2	35/88	35	88	EAC4_150411011441.RAW
High	K	2	KYGQDATNVGDEGGFAPNIQENK	6991	Unambiguous	genomic_reference:SL2.31ch09 evidence_code:10F1H1E1IEG gene_region:2371333-2375783 functional_description:"Enolase (AHRD V1 ***- C5J0G6_TOBAC); contains Interpro domain(s) IPR000941 Enolase "|genomic_reference:SL2.31ch10 evidence_code:10F1H1E1IEG gene_region:63994775-63999383 functional_description:"Enolase (AHRD V1 ***- C5J0G6_TOBAC); contains Interpro domain(s) IPR000941 Enolase "	2	2	Solyc09g009020.1.1;Solyc10g085550.1.1		CID	1	0	1	1	0	3.48e-07	543	498	4.57	0	1193.75	1	44	25	468200	3	818.051	2452.14	0	-0.01	25.92	2487	2487	MS2	35/88	35	88	EAH2.RAW
High	B	2	DLQDDFMGGAEIIKSDPVVSFR	17258	Unambiguous	genomic_reference:SL2.31ch08 evidence_code:10F0H1E1IEG gene_region:49546658-49549476 functional_description:"Elongation factor EF-2 (AHRD V1 **** Q9SGT4_ARATH); contains Interpro domain(s) IPR000795 Protein synthesis factor, GTP-binding "	2	1	Solyc08g062920.1.1		CID	1	0	1	1	0	1.2e-06	681	680	4.11	0	1424.1	1	7	25	569800	3	813.734	2439.19	0	0.83	61.87	5535	5535	MS2	35/84	35	84	AC2.RAW
High	D	2	VGDESYESFSAEKEAILSSLAR	15616	Unambiguous	genomic_reference:SL2.31ch06 evidence_code:10F0H1E1IEG gene_region:36234655-36238685 functional_description:"Alanine aminotransferase (AHRD V1 **** Q6VEJ5_CAPAN); contains Interpro domain(s) IPR004839 Aminotransferase, class I and II "	1	1	Solyc06g063090.1.1		CID	1	0	1	1	0	7.92e-08	647	690	3.62	0	2243.41	1	13	25	959900	3	796.724	2388.16	0	0.8	54.95	4906	4906	MS2	35/84	35	84	AH2.RAW
High	G	2	IPSAVGYQPTLATDLGGLQER	13265	Unambiguous	genomic_reference:SL2.31ch02 evidence_code:10F0H1E0IEG gene_region:47123903-47126760 functional_description:"ATP synthase subunit beta (AHRD V1 ***- Q9ZR78_NICSY); contains Interpro domain(s) IPR005722 ATPase, F1 complex, beta subunit "|genomic_reference:SL2.31ch04 evidence_code:10F1H1E1IEG gene_region:1237570-1241219 functional_description:"ATP synthase subunit beta (AHRD V1 ***- O82722_NICSY); …	3	3	Solyc02g091130.1.1;Solyc04g007550.1.1;Solyc05g008460.1.1		CID	1	0	1	1	0	3.15e-16	502	513	4.67	0	1991.81	0	4	16	3634000	3	729.387	2186.15	0	1.07	45.97	4256	4256	MS2	35/80	35	80	EAC2.RAW
High	H	2	LIADDSDFFANMVVEAVQAVK	21668	Unambiguous	genomic_reference:SL2.31ch01 evidence_code:10F1H1E1IEG gene_region:76163502-76172429 functional_description:"T-complex protein 1 subunit alpha (AHRD V1 ***- B9SF60_RICCO); contains Interpro domain(s) IPR012715 T-complex protein 1, alpha subunit "	1	1	Solyc01g090750.1.1		CID	1	0	1	1	0	2e-05	662	659	4.64	0	1221.67	0	7	25	200900	3	761.385	2282.14	0	0.85	90.59	7959	7959	MS2	35/80	35	80	EAC3_150410225534.RAW
High	A	2	EVNIDSATTLAGVISQIFDK	21438	Unambiguous	genomic_reference:SL2.31ch08 evidence_code:10F0H1E0IEG gene_region:58770370-58779934 functional_description:"Eukaryotic translation initiation factor 4 gamma 1 (AHRD V1 *-*- A9QXE6_MESAU); contains Interpro domain(s) IPR016021 MIF4-like, type 1/2/3 "	1	1	Solyc08g077700.1.1		CID	1	0	1	1	0	2.08e-07	537	540	4.17	0	1830.11	0	23	25	49540	3	707.706	2121.1	0	-1.4	87.51	7619	7619	MS2	35/76	35	76	AC1.RAW
High	B	2	IGANEPSQLAINDNANGLAR	8316	Unambiguous	genomic_reference:SL2.31ch09 evidence_code:10F0H1E1IEG gene_region:2645029-2646904 functional_description:"Fructose-bisphosphate aldolase (AHRD V1 ***- Q2PYX3_SOLTU); contains Interpro domain(s) IPR000741 Fructose-bisphosphate aldolase, class-I "|genomic_reference:SL2.31ch10 evidence_code:10F1H1E1IEG gene_region:62683898-62686621 functional_description:"Fructose-bisphosphate aldolase (AHRD V1 ***…	2	2	Solyc09g009260.1.1;Solyc10g083570.1.1		CID	1	0	1	1	0	1e-06	611	631	4.45	0	2172.15	0	8	12	4907000	3	680.016	2038.03	0	0.86	30.42	2863	2863	MS2	35/76	35	76	AC2.RAW
High	B	2	APmIDNPDFKDDPDLYVFPK	13140	Unambiguous	genomic_reference:SL2.31ch01 evidence_code:10F0H1E1IEG gene_region:82189196-82192436 functional_description:"Calreticulin 2 calcium-binding protein (AHRD V1 **** A8HMC0_CHLRE); contains Interpro domain(s) IPR009169 Calreticulin "	1	1	Solyc01g100380.1.1	M3(Oxidation)	CID	1	0	1	1	0	4.44e-08	589	585	4.88	0	2481.43	1	44	19	1198000	3	785.041	2353.11	0	0.6	46.79	4276	4276	MS2	35/76	35	76	AC2.RAW
High	H	2	APmIDNPDFKDDPDLYVFPK	13140	Unambiguous	genomic_reference:SL2.31ch01 evidence_code:10F0H1E1IEG gene_region:82189196-82192436 functional_description:"Calreticulin 2 calcium-binding protein (AHRD V1 **** A8HMC0_CHLRE); contains Interpro domain(s) IPR009169 Calreticulin "	1	1	Solyc01g100380.1.1	M3(Oxidation)	CID	1	0	1	1	0	2.91e-05	603	592	4.77	0	2325.82	1	17	25	1079000	3	785.04	2353.11	0	-0.25	47.9	4435	4435	MS2	35/76	35	76	EAC3_150410225534.RAW
High	I	2	LYmEARPmEEGLAEAIDEGR	9460	Unambiguous	genomic_reference:SL2.31ch08 evidence_code:10F0H1E1IEG gene_region:49546658-49549476 functional_description:"Elongation factor EF-2 (AHRD V1 **** Q9SGT4_ARATH); contains Interpro domain(s) IPR000795 Protein synthesis factor, GTP-binding "	2	1	Solyc08g062920.1.1	M3(Oxidation); M8(Oxidation)	CID	1	0	1	1	0	4.36e-10	406	433	4.27	0	1939.75	0	7	17	2530000	3	771.357	2312.06	0	0.81	35.67	3371	3371	MS2	35/76	35	76	EAC4_150411011441.RAW
High	K	2	DTFGPILVPSDKLWGAQTQR	14984	Unambiguous	genomic_reference:SL2.31ch09 evidence_code:10F1H1E1IEG gene_region:62645740-62653816 functional_description:"Fumarate hydratase class II (AHRD V1 ***- C5GAL1_AJEDR); contains Interpro domain(s) IPR005677 Fumarate hydratase, class II "	1	1	Solyc09g075450.1.1		CID	1	0	1	1	0	4.66e-07	519	537	4.82	0	1929.79	1	7	21	2464000	3	743.727	2229.17	0	0.6	53.81	4915	4915	MS2	35/76	35	76	EAH2.RAW
High	L	2	IGANEPSQLAINDNANGLAR	8316	Unambiguous	genomic_reference:SL2.31ch09 evidence_code:10F0H1E1IEG gene_region:2645029-2646904 functional_description:"Fructose-bisphosphate aldolase (AHRD V1 ***- Q2PYX3_SOLTU); contains Interpro domain(s) IPR000741 Fructose-bisphosphate aldolase, class-I "|genomic_reference:SL2.31ch10 evidence_code:10F1H1E1IEG gene_region:62683898-62686621 functional_description:"Fructose-bisphosphate aldolase (AHRD V1 ***…	2	2	Solyc09g009260.1.1;Solyc10g083570.1.1		CID	1	0	1	1	0	3.19e-16	596	601	4.17	0	2606.48	0	16	25	1089000	3	680.015	2038.03	0	0.14	31.84	3008	3008	MS2	35/76	35	76	EAH4.RAW
High	L	2	YSGALESFYEKFDPDFINIR	18537	Unambiguous	genomic_reference:SL2.31ch12 evidence_code:10F1H1E1IEG gene_region:47132509-47140184 functional_description:"V-type ATP synthase alpha chain (AHRD V1 ***- VATA_METTH); contains Interpro domain(s) IPR005725 ATPase, V1 complex, subunit A "	2	1	Solyc12g055800.1.1		CID	1	0	1	1	0	3.19e-16	674	646	5.22	0	2063.87	1	34	25	502300	3	804.388	2411.15	0	-2.2	71.12	6373	6373	MS2	35/76	35	76	EAH4.RAW
High	G	2	VDQGTLFDLILAANYLNIK	21259	Unambiguous	genomic_reference:SL2.31ch01 evidence_code:10F1H1E1IEG gene_region:89618410-89620055 functional_description:"Skp1 (AHRD V1 ***- Q49HP3_CAPAN); contains Interpro domain(s) IPR016897 E3 ubiquitin ligase, SCF complex, Skp subunit "|genomic_reference:SL2.31ch11 evidence_code:10F1H1E1IEG gene_region:34423195-34425524 functional_description:"SKP1 (AHRD V1 ***- Q68GS0_TOBAC); contains Interpro domain(s)…	2	1	Solyc11g042930.1.1		CID	1	0	1	1	0	3.15e-16	290	258	4.07	0	2455.36	0	10	25	240600	3	707.725	2121.16	0	0.07	86.49	7599	7599	MS2	35/72	35	72	EAC2.RAW
High	I	2	LVSQKFEDPAEGEDVLVGK	9627	Unambiguous	genomic_reference:SL2.31ch12 evidence_code:10F1H1E1IEG gene_region:47132509-47140184 functional_description:"V-type ATP synthase alpha chain (AHRD V1 ***- VATA_METTH); contains Interpro domain(s) IPR005725 ATPase, V1 complex, subunit A "	1	1	Solyc12g055800.1.1		CID	1	0	1	1	0	1.13e-08	624	587	5.08	0	1812.06	1	8	25	1292000	3	687.357	2060.06	0	0.38	36.04	3404	3404	MS2	35/72	35	72	EAC4_150411011441.RAW
High	C	2	VFEVSLADLQKDEDQAFR	15460	Unambiguous	genomic_reference:SL2.31ch03 evidence_code:10F1H1E1IEG gene_region:53730005-53732068 functional_description:"40S ribosomal protein S1 (AHRD V1 ***- RS3A_LENED); contains Interpro domain(s) IPR001593 Ribosomal protein S3Ae "|genomic_reference:SL2.31ch06 evidence_code:10F1H1E1IEG gene_region:41101725-41104317 functional_description:"40S ribosomal protein S1 (AHRD V1 ***- RS3A_LACBS); contains Inter…	2	2	Solyc03g097900.1.1;Solyc06g072490.1.1		CID	1	0	1	1	0	1.87e-09	647	662	3.77	0	1597.92	1	10	19	1271000	3	704.02	2110.05	0	0.56	54.57	4905	4905	MS2	35/68	35	68	AC3.RAW
High	C	2	LLEVDPDGAILAIGDMmR	14760	Unambiguous	genomic_reference:SL2.31ch11 evidence_code:10F1H1E1IEG gene_region:2859715-2863853 functional_description:"Acyl- (AHRD V1 ***- Q4JIJ4_9ROSI); contains Interpro domain(s) IPR005067 Fatty acid desaturase, type 2 "	1	1	Solyc11g008680.1.1	M17(Oxidation)	CID		0.0176	2	2	0	2.15e-07	607	609	3.91	0	2110.4	0	15	25	560200	3	648.998	1944.98	0	1.02	61.07	5437	5437	MS2	35/68	35	68	AC3.RAW
High	E	2	VFEVSLADLQKDEDQAFR	15460	Unambiguous	genomic_reference:SL2.31ch03 evidence_code:10F1H1E1IEG gene_region:53730005-53732068 functional_description:"40S ribosomal protein S1 (AHRD V1 ***- RS3A_LENED); contains Interpro domain(s) IPR001593 Ribosomal protein S3Ae "|genomic_reference:SL2.31ch06 evidence_code:10F1H1E1IEG gene_region:41101725-41104317 functional_description:"40S ribosomal protein S1 (AHRD V1 ***- RS3A_LACBS); contains Inter…	2	2	Solyc03g097900.1.1;Solyc06g072490.1.1		CID	1	0	1	1	0	0.00014	664	677	3.47	0	1586.83	1	2	25	1510000	3	704.021	2110.05	0	1	59.17	5291	5291	MS2	35/68	35	68	AH3.RAW
High	K	2	VFEVSLADLQKDEDQAFR	15460	Unambiguous	genomic_reference:SL2.31ch03 evidence_code:10F1H1E1IEG gene_region:53730005-53732068 functional_description:"40S ribosomal protein S1 (AHRD V1 ***- RS3A_LENED); contains Interpro domain(s) IPR001593 Ribosomal protein S3Ae "|genomic_reference:SL2.31ch06 evidence_code:10F1H1E1IEG gene_region:41101725-41104317 functional_description:"40S ribosomal protein S1 (AHRD V1 ***- RS3A_LACBS); contains Inter…	2	2	Solyc03g097900.1.1;Solyc06g072490.1.1		CID	1	0	1	1	0	2.83e-08	664	674	3.81	0	1560.2	1	9	25	1342000	3	704.021	2110.05	0	0.91	54.86	5004	5004	MS2	35/68	35	68	EAH2.RAW
High	L	2	VFEVSLADLQKDEDQAFR	15460	Unambiguous	genomic_reference:SL2.31ch03 evidence_code:10F1H1E1IEG gene_region:53730005-53732068 functional_description:"40S ribosomal protein S1 (AHRD V1 ***- RS3A_LENED); contains Interpro domain(s) IPR001593 Ribosomal protein S3Ae "|genomic_reference:SL2.31ch06 evidence_code:10F1H1E1IEG gene_region:41101725-41104317 functional_description:"40S ribosomal protein S1 (AHRD V1 ***- RS3A_LACBS); contains Inter…	2	2	Solyc03g097900.1.1;Solyc06g072490.1.1		CID	1	0	1	1	0	3.19e-16	638	641	3.56	0	1610.18	1	10	20	2019000	3	704.02	2110.05	0	0.04	57.37	5212	5212	MS2	35/68	35	68	EAH4.RAW
High	A	2	DRYIPDDAMIEGSHGLR	7045	Unambiguous	genomic_reference:SL2.31ch10 evidence_code:10F0H1E0IEG gene_region:64082694-64085929 functional_description:"Beta-fructofuranosidase insoluble isoenzyme 2 (AHRD V1 **-* B6U1H5_MAIZE); contains Interpro domain(s) IPR001362 Glycoside hydrolase, family 32 "	1	1	Solyc10g085640.1.1		CID	1	0	1	1	0	4.13e-09	551	555	4.83	0	2309.59	1	22	25	1289000	3	648.979	1944.92	0	-0.17	32.1	2984	2984	MS2	35/64	35	64	AC1.RAW
High	C	2	DRYIPDDAMIEGSHGLR	7045	Unambiguous	genomic_reference:SL2.31ch10 evidence_code:10F0H1E0IEG gene_region:64082694-64085929 functional_description:"Beta-fructofuranosidase insoluble isoenzyme 2 (AHRD V1 **-* B6U1H5_MAIZE); contains Interpro domain(s) IPR001362 Glycoside hydrolase, family 32 "	1	1	Solyc10g085640.1.1		CID	1	0	1	1	0	1.66e-08	551	557	4.82	0	2083.1	1	35	24	1805000	3	648.979	1944.92	0	-0.07	31.05	2913	2913	MS2	35/64	35	64	AC3.RAW
High	J	2	QAFDEAISELDTLGEESYKDSTLImQLLR	43579	Unambiguous	genomic_reference:SL2.31ch02 evidence_code:10F1H1E1IEG gene_region:29691928-29696785 functional_description:"14-3-3 protein beta/alpha-1 (AHRD V1 **-- 143B1_DANRE); contains Interpro domain(s) IPR000308 14-3-3 protein "	1	1	Solyc02g063070.1.1	M25(Oxidation)	CID	1	0	1	1	0.00177	0.119	782	705	4.06	0	497.94	1	15	25	164800	4	833.663	3331.63	0	1.83	95.09	8486	8486	MS2	35/168	35	168	EAH1.RAW
High	E	2	TNDLAGDGTTTSVVLAQGLIAEGVKVVAAGANPVLITR	103329	Unambiguous	genomic_reference:SL2.31ch01 evidence_code:10F1H1E1IEG gene_region:33327275-33331326 functional_description:"chaperonin (AHRD V1 ***- B4VMY1_9CYAN); contains Interpro domain(s) IPR001844 Chaperonin Cpn60 "	1	1	Solyc01g028810.1.1		CID	1	0	1	1	0	0.000226	119	121	3.5	0	1061.12	1	0	25	486000	3	1231.35	3692.03	0	1.15	96.1	8330	8330	MS2	35/148	35	148	AH3.RAW
High	G	2	NPAYPDTLYVDPLIGPDTVSTMPDQALQAFIDHGSVAR	19456	Unambiguous	genomic_reference:SL2.31ch00 evidence_code:10F1H1E1IEG gene_region:5777009-5780213 functional_description:"Transaldolase (AHRD V1 ***- Q9FVH1_SOLLC); contains Interpro domain(s) IPR014634 Transaldolase, bacterial/plant type "	1	1	Solyc00g006800.1.1		CID	1	0	1	1	0	3.15e-16	585	537	3.47	0	532.95	0	2	25	315300	3	1362.34	4085	0	-0.02	79.2	7004	7004	MS2	35/148	35	148	EAC2.RAW
High	A	2	TGSITQIPILTmPNDDITHPTPDLTGYITEGQIYIDR	17997	Unambiguous	genomic_reference:SL2.31ch01 evidence_code:10F1H1E1IEG gene_region:89701881-89706797 functional_description:"V-type ATP synthase beta chain (AHRD V1 ***- VATB_PYRHO); contains Interpro domain(s) IPR005723 ATPase, V1 complex, subunit B "	2	1	Solyc01g111760.1.1	M12(Oxidation)	CID	1	0	1	1	0	2.66e-06	556	529	3.88	0	321.27	0	0	25	449400	3	1372.69	4116.05	0	0.62	65.88	5840	5840	MS2	35/144	35	144	AC1.RAW
High	C	2	TGSITQIPILTmPNDDITHPTPDLTGYITEGQIYIDR	17997	Unambiguous	genomic_reference:SL2.31ch01 evidence_code:10F1H1E1IEG gene_region:89701881-89706797 functional_description:"V-type ATP synthase beta chain (AHRD V1 ***- VATB_PYRHO); contains Interpro domain(s) IPR005723 ATPase, V1 complex, subunit B "	2	1	Solyc01g111760.1.1	M12(Oxidation)	CID	1	0	1	1	0	4.65e-07	554	519	3.49	0	274.05	0	3	25	171000	3	1372.69	4116.05	0	1.24	65.04	5762	5762	MS2	35/144	35	144	AC3.RAW
High	F	2	SSSmFDPFSIDVFDPFRELGFPGTNSGESSAFANTR	124630	Unambiguous	genomic_reference:SL2.31ch06 evidence_code:10F1H1E1IEG gene_region:43951450-43951914 functional_description:"class I heat shock protein (AHRD V1 ***- Q69BI7_CARPA); contains Interpro domain(s) IPR002068 Heat shock protein Hsp20 "	1	1	Solyc06g076560.1.1	M4(Oxidation)	CID	1	0	1	1	0	1.04e-11	488	402	4.49	0	617.34	1	0	25	298800	3	1311.6	3932.78	0	1.51	87.77	7759	7759	MS2	35/140	35	140	AH4.RAW
High	B	2	IHDLIGINTDVPAPDmGTNAQTMAWILDEYSK	18129	Unambiguous	genomic_reference:SL2.31ch05 evidence_code:10F0H1E1IEG gene_region:61565704-61570805 functional_description:"Glutamate dehydrogenase (AHRD V1 **** Q94IA5_BRANA); contains Interpro domain(s) IPR014362 Glutamate dehydrogenase "	1	1	Solyc05g052100.1.1	M16(Oxidation)	CID	1	0	1	1	0	1.68e-05	685	709	3.93	0	773.32	0	2	25	255200	3	1182.57	3545.69	0	-0.87	65.28	5816	5816	MS2	35/124	35	124	AC2.RAW
High	G	2	ILLTSTSEVYGDPLIHPQDESYWGNVNPIGVR	16765	Unambiguous	genomic_reference:SL2.31ch04 evidence_code:10F1H1E1IEG gene_region:3868903-3871560 functional_description:"UDP-glucose 4-epimerase (AHRD V1 **-* D5RML8_9PROT); contains Interpro domain(s) IPR016040 NAD(P)-binding domain "	1	1	Solyc04g011400.1.1		CID	1	0	1	1	0	3.15e-16	584	610	4.37	0	1306.36	0	1	25	1818000	3	1190.6	3569.79	0	0.41	60.94	5500	5500	MS2	35/124	35	124	EAC2.RAW
High	B	2	APNLSNVISKPEPSTVAQDDEDVDETGVEPK	10174	Unambiguous	genomic_reference:SL2.31ch10 evidence_code:10F0H1E1IEG gene_region:61533717-61537084 functional_description:"Nascent polypeptide-associated complex alpha subunit-like protein (AHRD V1 ***- B6T903_MAIZE); contains Interpro domain(s) IPR016641 Nascent polypeptide-associated complex, alpha subunit "	2	1	Solyc10g081030.1.1		CID	1	0	1	1	0	2.56e-05	671	681	4.55	0	1627.55	0	1	25	968500	3	1094.2	3280.57	0	0.95	36.58	3407	3407	MS2	35/120	35	120	AC2.RAW
High	G	2	WNYDGSSTGQASGEDSEVILYPQAIFKDPFR	18035	Unambiguous	genomic_reference:SL2.31ch05 evidence_code:10F0H1E1IEG gene_region:60677361-60680424 functional_description:"Glutamine synthetase (AHRD V1 ***- A9PB10_POPTR); contains Interpro domain(s) IPR008146 Glutamine synthetase, catalytic region "	1	1	Solyc05g051250.1.1		CID	1	0	1	1	0	3.15e-16	590	558	4.75	0	1241	1	0	25	1519000	3	1159.88	3477.62	0	0.04	65.59	5884	5884	MS2	35/120	35	120	EAC2.RAW
High	H	2	WNYDGSSTGQASGEDSEVILYPQAIFKDPFR	18035	Unambiguous	genomic_reference:SL2.31ch05 evidence_code:10F0H1E1IEG gene_region:60677361-60680424 functional_description:"Glutamine synthetase (AHRD V1 ***- A9PB10_POPTR); contains Interpro domain(s) IPR008146 Glutamine synthetase, catalytic region "	1	1	Solyc05g051250.1.1		CID	1	0	1	1	0	5.26e-07	591	560	5.04	0	1026.81	1	0	24	3287000	3	1159.88	3477.62	0	0.15	69.52	6267	6267	MS2	35/120	35	120	EAC3_150410225534.RAW
High	G	2	TTGIVLDSGDGVSHTVPIYEGYALPHAILR	15317	Unambiguous	genomic_reference:SL2.31ch03 evidence_code:10F1H1E1IEG gene_region:44382119-44383552 functional_description:"Actin (AHRD V1 ***- Q7XZJ2_GOSHI); contains Interpro domain(s) IPR004000 Actin/actin-like "|genomic_reference:SL2.31ch10 evidence_code:10F1H1E1IEG gene_region:61080001-61081737 functional_description:"Actin (AHRD V1 ***- B5M4V6_TOBAC); contains Interpro domain(s) IPR004000 Actin/actin-like…	8	3	Solyc03g078400.1.1;Solyc01g104770.1.1;Solyc10g086460.1.1		CID	1	0	1	1	0	3.15e-16	449	438	5.85	0	1239.5	0	0	25	1682000	3	1051.22	3151.64	0	0.25	52.84	4830	4830	MS2	35/116	35	116	EAC2.RAW
High	L	2	TTGIVLDSGDGVSHTVPIYEGYALPHAILR	15317	Unambiguous	genomic_reference:SL2.31ch03 evidence_code:10F1H1E1IEG gene_region:44382119-44383552 functional_description:"Actin (AHRD V1 ***- Q7XZJ2_GOSHI); contains Interpro domain(s) IPR004000 Actin/actin-like "|genomic_reference:SL2.31ch10 evidence_code:10F1H1E1IEG gene_region:61080001-61081737 functional_description:"Actin (AHRD V1 ***- B5M4V6_TOBAC); contains Interpro domain(s) IPR004000 Actin/actin-like…	8	3	Solyc03g078400.1.1;Solyc01g104770.1.1;Solyc10g086460.1.1		CID	1	0	1	1	0	3.19e-16	437	416	5.32	0	1238.12	0	0	25	985600	3	1051.22	3151.65	0	1.53	57.85	5254	5254	MS2	35/116	35	116	EAH4.RAW
High	C	2	DKPLPSWSDSDVEEFIASDPLHGPTLR	17453	Unambiguous	genomic_reference:SL2.31ch06 evidence_code:10F1H1E1IEG gene_region:42013245-42016680 functional_description:"Unknown Protein (AHRD V1)"	1	1	Solyc06g073900.1.1		CID	1	0	1	1	0	2.72e-07	718	709	4.1	0	812.84	0	5	25	825200	3	1003.49	3008.47	0	1.06	62.89	5588	5588	MS2	35/104	35	104	AC3.RAW
High	G	2	ALLAIPTTIADNAGLDSAELIAQLR	20912	Unambiguous	genomic_reference:SL2.31ch11 evidence_code:10F1H1E1IEG gene_region:50651405-50656732 functional_description:"T-complex protein 1 subunit beta (AHRD V1 ***- B6T8X5_MAIZE); contains Interpro domain(s) IPR012716 T-complex protein 1, beta subunit "	1	1	Solyc11g069000.1.1		CID	1	0	1	1	0	3.15e-16	188	195	3.63	0	841.26	0	12	25	1733000	3	850.809	2550.41	0	-0.11	82.46	7269	7269	MS2	34/96	34	96	EAC2.RAW
High	J	2	GIDVQQVSLVINYDLPTQPENYLHR	16770	Unambiguous	genomic_reference:SL2.31ch12 evidence_code:10F1H1E1IEG gene_region:63425877-63428469 functional_description:"ATP-dependent RNA helicase eIF4A (AHRD V1 ***- A8PG49_COPC7); contains Interpro domain(s) IPR011545 DNA/RNA helicase, DEAD/DEAH box type, N-terminal "|genomic_reference:SL2.31ch06 evidence_code:10F0H1E1IEG gene_region:36012777-36014915 functional_description:"ATP-dependent RNA helicase eIF…	5	2	Solyc12g096000.1.1;Solyc06g062800.1.1		CID	1	0	1	1	0	0.000109	544	527	3.9	0	1295.94	0	14	25	822200	3	971.17	2911.5	0	0.41	61.6	5708	5708	MS2	34/96	34	96	EAH1.RAW
High	J	2	WFDTNYHFIVPELGPDVNFSYASHK	17791	Unambiguous	genomic_reference:SL2.31ch10 evidence_code:10F1H1E1IEG gene_region:61889662-61892937 functional_description:"5-methyltetrahydropteroyltriglutamate--homocysteine methyltransferase (AHRD V1 ***- B6UF55_MAIZE); contains Interpro domain(s) IPR006276 5-methyltetrahydropteroyltriglutamate--homocysteine S-methyltransferase "	1	1	Solyc10g081510.1.1		CID	1	0	1	1	0	0.000149	626	577	5.09	0	936.77	0	6	25	487700	3	995.138	2983.4	0	-1.51	65.51	6037	6037	MS2	34/96	34	96	EAH1.RAW
High	J	2	AEATDVANAVLDGTDAILLGAETLR	21397	Unambiguous	genomic_reference:SL2.31ch09 evidence_code:10F1H1E1IEG gene_region:2260322-2267191 functional_description:"Pyruvate kinase (AHRD V1 ***- A9P7U5_POPTR); contains Interpro domain(s) IPR001697 Pyruvate kinase "|genomic_reference:SL2.31ch10 evidence_code:10F1H1E1IEG gene_region:62809938-62815473 functional_description:"Pyruvate kinase (AHRD V1 ***- Q94KE3_ARATH); contains Interpro domain(s) IPR001697…	2	2	Solyc09g008840.1.1;Solyc10g083720.1.1		CID	1	0	1	1	0	5.29e-05	547	509	4.34	0	1472.48	0	14	25	399600	3	833.771	2499.3	0	1.62	88.51	7945	7945	MS2	34/96	34	96	EAH1.RAW
High	D	2	FGNIELSPSAGILNYGQGLFEGLK	19928	Selected	genomic_reference:SL2.31ch02 evidence_code:10F0H1E1IEG gene_region:47758983-47765135 functional_description:"Branched-chain-amino-acid aminotransferase (AHRD V1 ***- Q9SNY8_SOLTU); contains Interpro domain(s) IPR005786 Branched-chain amino acid aminotransferase II "	1	1	Solyc02g091970.1.1		CID	0.0052	0	1	1	0	1.58e-06	502	524	3.88	0	1576.9	0	34	25	129300	3	842.109	2524.31	0	1.93	74.86	6548	6548	MS2	34/92	34	92	AH2.RAW
High	E	2	ILASVGAEADDDRIQLLLSQVEGK	99992	Unambiguous	genomic_reference:SL2.31ch06 evidence_code:10F0H1E1IEG gene_region:42459548-42462032 functional_description:"60s acidic ribosomal protein-like protein (AHRD V1 ***- Q3HVP0_SOLTU); contains Interpro domain(s) IPR001813 Ribosomal protein 60S "	1	1	Solyc06g074430.1.1		CID	1	0	1	1	0	0.00028	407	361	4.79	0	1444.2	1	10	25	336400	3	847.457	2540.36	0	0.13	67.78	6013	6013	MS2	34/92	34	92	AH3.RAW
High	K	2	FGNIELSPSAGILNYGQGLFEGLK	19928	Selected	genomic_reference:SL2.31ch02 evidence_code:10F0H1E1IEG gene_region:47758983-47765135 functional_description:"Branched-chain-amino-acid aminotransferase (AHRD V1 ***- Q9SNY8_SOLTU); contains Interpro domain(s) IPR005786 Branched-chain amino acid aminotransferase II "	1	1	Solyc02g091970.1.1		CID		0.0062	2	2	0	1.42e-07	510	531	4.8	0	1542.27	0	14	25	308900	3	842.109	2524.31	0	1.06	75.5	6732	6732	MS2	34/92	34	92	EAH2.RAW
High	B	2	GLLGDKANLSIYDPQVSEDQIQR	12279	Unambiguous	genomic_reference:SL2.31ch02 evidence_code:10F0H1E1IEG gene_region:31886439-31888009 functional_description:"UDP-D-glucose dehydrogenase (AHRD V1 ***- D2WK25_GOSHI); contains Interpro domain(s) IPR014028 UDP-glucose/GDP-mannose dehydrogenase, dimerisation and substrate-binding "	1	1	Solyc02g067080.1.1		CID	1	0	1	1	0	1.89e-07	646	662	4.9	0	1931.34	1	3	25	496400	3	853.773	2559.3	0	-0.5	43.68	4015	4015	MS2	34/88	34	88	AC2.RAW
High	B	2	FLLDDVYRNPGPLQFDGPGADAK	15277	Unambiguous	genomic_reference:SL2.31ch12 evidence_code:10F1H1E1IEG gene_region:63232222-63238853 functional_description:"Diphosphate--fructose-6-phosphate 1-phosphotransferase (AHRD V1 ***- C8PT93_9SPIO); contains Interpro domain(s) IPR011183 Pyrophosphate-dependent phosphofructokinase PfpB "	2	1	Solyc12g095760.1.1		CID	1	0	1	1	0	2.49e-10	718	720	5.44	0	1700.21	1	11	25	1034000	3	835.752	2505.24	0	0.71	54.31	4908	4908	MS2	34/88	34	88	AC2.RAW
High	C	2	GLLGDKANLSIYDPQVSEDQIQR	12279	Unambiguous	genomic_reference:SL2.31ch02 evidence_code:10F0H1E1IEG gene_region:31886439-31888009 functional_description:"UDP-D-glucose dehydrogenase (AHRD V1 ***- D2WK25_GOSHI); contains Interpro domain(s) IPR014028 UDP-glucose/GDP-mannose dehydrogenase, dimerisation and substrate-binding "	1	1	Solyc02g067080.1.1		CID	1	0	1	1	0	3.22e-08	637	657	4.68	0	1777.4	1	1	25	1877000	3	853.773	2559.31	0	0.28	43.22	3964	3964	MS2	34/88	34	88	AC3.RAW
High	D	2	GLLGDKANLSIYDPQVSEDQIQR	12279	Unambiguous	genomic_reference:SL2.31ch02 evidence_code:10F0H1E1IEG gene_region:31886439-31888009 functional_description:"UDP-D-glucose dehydrogenase (AHRD V1 ***- D2WK25_GOSHI); contains Interpro domain(s) IPR014028 UDP-glucose/GDP-mannose dehydrogenase, dimerisation and substrate-binding "	1	1	Solyc02g067080.1.1		CID	1	0	1	1	0	1.19e-07	637	663	5.04	0	1963.09	1	2	25	1423000	3	853.774	2559.31	0	1.14	43.01	3903	3903	MS2	34/88	34	88	AH2.RAW
High	I	2	LVVDEATNDDNSVVAIHPDTmEK	30228	Unambiguous	genomic_reference:SL2.31ch10 evidence_code:10F0H1E1IEG gene_region:63047725-63052601 functional_description:"26S protease regulatory subunit 6B homolog (AHRD V1 *--- PRS6B_ARATH); contains Interpro domain(s) IPR005938 ATPase, AAA-type, CDC48 "	1	1	Solyc10g084050.1.1	M21(Oxidation)	CID	1	0	1	1	0	1.05e-07	595	553	4.61	0	1404.03	0	26	25	368800	3	843.398	2528.18	0	-1.3	30.64	2919	2919	MS2	34/88	34	88	EAC4_150411011441.RAW
High	L	2	KYGQDATNVGDEGGFAPNIQENK	6991	Unambiguous	genomic_reference:SL2.31ch09 evidence_code:10F1H1E1IEG gene_region:2371333-2375783 functional_description:"Enolase (AHRD V1 ***- C5J0G6_TOBAC); contains Interpro domain(s) IPR000941 Enolase "|genomic_reference:SL2.31ch10 evidence_code:10F1H1E1IEG gene_region:63994775-63999383 functional_description:"Enolase (AHRD V1 ***- C5J0G6_TOBAC); contains Interpro domain(s) IPR000941 Enolase "	2	2	Solyc09g009020.1.1;Solyc10g085550.1.1		CID	1	0	1	1	0	3.19e-16	516	488	3.81	0	1131.81	1	49	25	65480	3	818.047	2452.13	0	-4.56	26.95	2566	2566	MS2	34/88	34	88	EAH4.RAW
High	C	2	KDLYGNIVLSGGTTmFPGIADR	13482	Unambiguous	genomic_reference:SL2.31ch10 evidence_code:10F1H1E1IEG gene_region:61080001-61081737 functional_description:"Actin (AHRD V1 ***- B5M4V6_TOBAC); contains Interpro domain(s) IPR004000 Actin/actin-like "|genomic_reference:SL2.31ch01 evidence_code:10F0H1E1IEG gene_region:84898357-84900149 functional_description:"Actin (AHRD V1 ***- Q6F4H4_TOBAC); contains Interpro domain(s) IPR004000 Actin/actin-like…	6	2	Solyc01g104770.1.1;Solyc11g065990.1.1	M15(Oxidation)	CID	1	0	1	1	0	1.06e-09	671	668	4.46	0	1072.55	1	14	25	1629000	3	781.067	2341.19	0	0.23	47.54	4324	4324	MS2	34/84	34	84	AC3.RAW
High	K	2	KDLYGNIVLSGGTTmFPGIADR	13482	Unambiguous	genomic_reference:SL2.31ch10 evidence_code:10F1H1E1IEG gene_region:61080001-61081737 functional_description:"Actin (AHRD V1 ***- B5M4V6_TOBAC); contains Interpro domain(s) IPR004000 Actin/actin-like "|genomic_reference:SL2.31ch01 evidence_code:10F0H1E1IEG gene_region:84898357-84900149 functional_description:"Actin (AHRD V1 ***- Q6F4H4_TOBAC); contains Interpro domain(s) IPR004000 Actin/actin-like…	6	2	Solyc01g104770.1.1;Solyc11g065990.1.1	M15(Oxidation)	CID	1	0	1	1	0	1.24e-07	670	665	4.55	0	903.91	1	6	25	1043000	3	781.067	2341.19	0	-0.24	48.13	4432	4432	MS2	34/84	34	84	EAH2.RAW
High	C	2	VPFTSGLGLDTIGVETDKAGR	56980	Unambiguous	genomic_reference:SL2.31ch12 evidence_code:10F1H1E1IEG gene_region:64711418-64716419 functional_description:"Dihydrolipoyl dehydrogenase (AHRD V1 ***- Q9FEN7_SOLTU); contains Interpro domain(s) IPR006258 Dihydrolipoamide dehydrogenase "	1	1	Solyc12g099100.1.1		CID	1	0	1	1	0	8.08e-09	568	625	5.06	0	1315.59	1	32	25	724100	3	711.711	2133.12	0	-0.4	46.13	4206	4206	MS2	34/80	34	80	AC3.RAW
High	C	2	TVDTTGAGDAFVGSLLVSIAK	18841	Unambiguous	genomic_reference:SL2.31ch11 evidence_code:10F0H1E0IEG gene_region:34310265-34312777 functional_description:"5-dehydro-2-deoxygluconokinase (AHRD V1 **-- IOLC_GEOTN); contains Interpro domain(s) IPR011611 Carbohydrate/purine kinase "	1	1	Solyc11g042850.1.1		CID	1	0	1	1	0	4.28e-08	443	433	4.04	0	2065.65	0	26	25	137600	3	674.696	2022.07	0	-0.93	69.31	6108	6108	MS2	34/80	34	80	AC3.RAW
High	D	2	TVDTTGAGDAFVGSLLVSIAK	18841	Unambiguous	genomic_reference:SL2.31ch11 evidence_code:10F0H1E0IEG gene_region:34310265-34312777 functional_description:"5-dehydro-2-deoxygluconokinase (AHRD V1 **-- IOLC_GEOTN); contains Interpro domain(s) IPR011611 Carbohydrate/purine kinase "	1	1	Solyc11g042850.1.1		CID	1	0	1	1	0	2.97e-09	441	420	3.99	0	1999.68	0	23	25	259400	3	674.697	2022.08	0	0.88	69.21	6085	6085	MS2	34/80	34	80	AH2.RAW
High	E	2	LTGmAFRVPTVDVSVVDLTAR	15163	Unambiguous	genomic_reference:SL2.31ch05 evidence_code:10F0H1E0IEG gene_region:648534-651184 functional_description:"Glyceraldehyde-3-phosphate dehydrogenase (AHRD V1 **** Q9XG67_TOBAC); contains Interpro domain(s) IPR000173 Glyceraldehyde 3-phosphate dehydrogenase "	1	1	Solyc05g005820.1.1	M4(Oxidation)	CID	1	0	1	1	0	0.00259	405	368	4.4	0	2060.84	1	28	25	402900	3	755.076	2263.21	0	1.12	58.36	5225	5225	MS2	34/80	34	80	AH3.RAW
High	G	2	LTGmAFRVPTVDVSVVDLTAR	15163	Unambiguous	genomic_reference:SL2.31ch05 evidence_code:10F0H1E0IEG gene_region:648534-651184 functional_description:"Glyceraldehyde-3-phosphate dehydrogenase (AHRD V1 **** Q9XG67_TOBAC); contains Interpro domain(s) IPR000173 Glyceraldehyde 3-phosphate dehydrogenase "	1	1	Solyc05g005820.1.1	M4(Oxidation)	CID	1	0	1	1	0	3.15e-16	410	377	4.75	0	1980.73	1	30	19	1893000	3	755.076	2263.21	0	0.31	52.53	4804	4804	MS2	34/80	34	80	EAC2.RAW
High	G	2	TVDTTGAGDAFVGSLLVSIAK	18841	Unambiguous	genomic_reference:SL2.31ch11 evidence_code:10F0H1E0IEG gene_region:34310265-34312777 functional_description:"5-dehydro-2-deoxygluconokinase (AHRD V1 **-- IOLC_GEOTN); contains Interpro domain(s) IPR011611 Carbohydrate/purine kinase "	1	1	Solyc11g042850.1.1		CID	1	0	1	1	0	3.15e-16	448	435	4.94	0	2143.02	0	38	25	310500	3	674.696	2022.07	0	-1.57	68.79	6148	6148	MS2	34/80	34	80	EAC2.RAW
High	G	2	AVLDPADPLGFLQAAFEFVGR	22215	Unambiguous	genomic_reference:SL2.31ch03 evidence_code:10F1H1E1IEG gene_region:46784322-46788425 functional_description:"Nuclear movement protein nudc (AHRD V1 *-*- Q17KI6_AEDAE); contains Interpro domain(s) IPR017447 CS "	1	1	Solyc03g083390.1.1		CID	1	0	1	1	0	3.15e-16	537	520	4.29	0	1309.66	0	5	25	198600	3	745.06	2233.17	0	0.55	98.25	8587	8587	MS2	34/80	34	80	EAC2.RAW
High	K	2	LTGmAFRVPTVDVSVVDLTAR	15163	Unambiguous	genomic_reference:SL2.31ch05 evidence_code:10F0H1E0IEG gene_region:648534-651184 functional_description:"Glyceraldehyde-3-phosphate dehydrogenase (AHRD V1 **** Q9XG67_TOBAC); contains Interpro domain(s) IPR000173 Glyceraldehyde 3-phosphate dehydrogenase "	1	1	Solyc05g005820.1.1	M4(Oxidation)	CID	1	0	1	1	0	7.93e-09	404	373	4.92	0	1834.45	1	18	20	1299000	3	755.076	2263.21	0	0.15	54.48	4972	4972	MS2	34/80	34	80	EAH2.RAW
High	A	2	EAPSFVEQATEQQILVTGIK	14781	Unambiguous	genomic_reference:SL2.31ch02 evidence_code:10F0H1E0IEG gene_region:47123903-47126760 functional_description:"ATP synthase subunit beta (AHRD V1 ***- Q9ZR78_NICSY); contains Interpro domain(s) IPR005722 ATPase, F1 complex, beta subunit "	1	1	Solyc02g091130.1.1		CID	1	0	1	1	0	1.31e-07	509	506	4.53	0	1894.2	0	11	25	1399000	3	730.055	2188.15	0	0	53.14	4783	4783	MS2	34/76	34	76	AC1.RAW
High	C	2	YSGALESFYEKFDPDFINIR	18537	Unambiguous	genomic_reference:SL2.31ch12 evidence_code:10F1H1E1IEG gene_region:47132509-47140184 functional_description:"V-type ATP synthase alpha chain (AHRD V1 ***- VATA_METTH); contains Interpro domain(s) IPR005725 ATPase, V1 complex, subunit A "	2	1	Solyc12g055800.1.1		CID	1	0	1	1	0	1.88e-07	700	674	4.27	0	1852.26	1	22	25	709500	3	804.39	2411.16	0	0.3	67.67	5975	5975	MS2	34/76	34	76	AC3.RAW
High	C	2	FDDGLPPILTALEVLDNQIR	21890	Unambiguous	genomic_reference:SL2.31ch04 evidence_code:10F1H1E1IEG gene_region:1237570-1241219 functional_description:"ATP synthase subunit beta (AHRD V1 ***- O82722_NICSY); contains Interpro domain(s) IPR005722 ATPase, F1 complex, beta subunit "	1	1	Solyc04g007550.1.1		CID	1	0	1	1	0	1.29e-08	431	396	3.93	0	1426.45	0	10	25	127300	3	747.07	2239.2	0	-0.76	94.47	7983	7983	MS2	34/76	34	76	AC3.RAW
High	D	2	DTFGPILVPSDKLWGAQTQR	14984	Unambiguous	genomic_reference:SL2.31ch09 evidence_code:10F1H1E1IEG gene_region:62645740-62653816 functional_description:"Fumarate hydratase class II (AHRD V1 ***- C5GAL1_AJEDR); contains Interpro domain(s) IPR005677 Fumarate hydratase, class II "	1	1	Solyc09g075450.1.1		CID	1	0	1	1	0	2.21e-09	531	552	4.27	0	1611.02	1	11	23	1837000	3	743.728	2229.17	0	1.1	52.47	4700	4700	MS2	34/76	34	76	AH2.RAW
High	E	2	YSGALESFYEKFDPDFINIR	18537	Unambiguous	genomic_reference:SL2.31ch12 evidence_code:10F1H1E1IEG gene_region:47132509-47140184 functional_description:"V-type ATP synthase alpha chain (AHRD V1 ***- VATA_METTH); contains Interpro domain(s) IPR005725 ATPase, V1 complex, subunit A "	2	1	Solyc12g055800.1.1		CID	1	0	1	1	0	0.000471	697	673	4.08	0	1770.88	1	33	25	774300	3	804.39	2411.16	0	0.38	74.18	6545	6545	MS2	34/76	34	76	AH3.RAW
High	F	2	APmIDNPDFKDDPDLYVFPK	13140	Unambiguous	genomic_reference:SL2.31ch01 evidence_code:10F0H1E1IEG gene_region:82189196-82192436 functional_description:"Calreticulin 2 calcium-binding protein (AHRD V1 **** A8HMC0_CHLRE); contains Interpro domain(s) IPR009169 Calreticulin "	1	1	Solyc01g100380.1.1	M3(Oxidation)	CID	1	0	1	1	0	1.54e-13	587	583	4.6	0	1920.23	1	21	25	1438000	3	785.041	2353.11	0	0.76	49.71	4607	4607	MS2	34/76	34	76	AH4.RAW
High	G	2	DTFGPILVPSDKLWGAQTQR	14984	Unambiguous	genomic_reference:SL2.31ch09 evidence_code:10F1H1E1IEG gene_region:62645740-62653816 functional_description:"Fumarate hydratase class II (AHRD V1 ***- C5GAL1_AJEDR); contains Interpro domain(s) IPR005677 Fumarate hydratase, class II "	1	1	Solyc09g075450.1.1		CID	1	0	1	1	0	3.15e-16	535	556	4.18	0	1546.7	1	10	13	2595000	3	743.728	2229.17	0	1.59	51.87	4749	4749	MS2	34/76	34	76	EAC2.RAW
High	G	2	YHPEVDLDEVNALAQLmTWK	16841	Unambiguous	genomic_reference:SL2.31ch05 evidence_code:10F0H1E1IEG gene_region:61565704-61570805 functional_description:"Glutamate dehydrogenase (AHRD V1 **** Q94IA5_BRANA); contains Interpro domain(s) IPR014362 Glutamate dehydrogenase "	1	1	Solyc05g052100.1.1	M17(Oxidation)	CID	1	0	1	1	0	3.15e-16	646	691	4.01	0	1912.04	0	10	20	2414000	3	796.724	2388.16	0	1.08	59.67	5394	5394	MS2	34/76	34	76	EAC2.RAW
High	H	2	YSGALESFYEKFDPDFINIR	18537	Unambiguous	genomic_reference:SL2.31ch12 evidence_code:10F1H1E1IEG gene_region:47132509-47140184 functional_description:"V-type ATP synthase alpha chain (AHRD V1 ***- VATA_METTH); contains Interpro domain(s) IPR005725 ATPase, V1 complex, subunit A "	2	1	Solyc12g055800.1.1		CID	1	0	1	1	0	1.48e-06	698	673	4.14	0	1708.88	1	22	25	937300	3	804.39	2411.16	0	0.38	70.65	6361	6361	MS2	34/76	34	76	EAC3_150410225534.RAW
High	I	2	IGANEPSQLAINDNANGLAR	8316	Unambiguous	genomic_reference:SL2.31ch09 evidence_code:10F0H1E1IEG gene_region:2645029-2646904 functional_description:"Fructose-bisphosphate aldolase (AHRD V1 ***- Q2PYX3_SOLTU); contains Interpro domain(s) IPR000741 Fructose-bisphosphate aldolase, class-I "|genomic_reference:SL2.31ch10 evidence_code:10F1H1E1IEG gene_region:62683898-62686621 functional_description:"Fructose-bisphosphate aldolase (AHRD V1 ***…	2	2	Solyc09g009260.1.1;Solyc10g083570.1.1		CID	1	0	1	1	0	6.78e-08	609	626	4.82	0	2405.5	0	11	19	2085000	3	680.016	2038.03	0	0.5	31.74	3017	3017	MS2	34/76	34	76	EAC4_150411011441.RAW
High	I	2	APmIDNPDFKDDPDLYVFPK	13140	Unambiguous	genomic_reference:SL2.31ch01 evidence_code:10F0H1E1IEG gene_region:82189196-82192436 functional_description:"Calreticulin 2 calcium-binding protein (AHRD V1 **** A8HMC0_CHLRE); contains Interpro domain(s) IPR009169 Calreticulin "	1	1	Solyc01g100380.1.1	M3(Oxidation)	CID	1	0	1	1	0	2.13e-07	602	595	3.99	0	2035.2	1	7	25	443100	3	785.04	2353.11	0	-0.1	47.5	4403	4403	MS2	34/76	34	76	EAC4_150411011441.RAW
High	J	2	LYmEARPmEEGLAEAIDEGR	9460	Unambiguous	genomic_reference:SL2.31ch08 evidence_code:10F0H1E1IEG gene_region:49546658-49549476 functional_description:"Elongation factor EF-2 (AHRD V1 **** Q9SGT4_ARATH); contains Interpro domain(s) IPR000795 Protein synthesis factor, GTP-binding "	2	1	Solyc08g062920.1.1	M3(Oxidation); M8(Oxidation)	CID	1	0	1	1	0	2.16e-05	419	442	4.17	0	1854.46	0	21	8	6502000	3	771.356	2312.05	0	0.41	35.52	3435	3435	MS2	34/76	34	76	EAH1.RAW
High	J	2	APmIDNPDFKDDPDLYVFPK	13140	Unambiguous	genomic_reference:SL2.31ch01 evidence_code:10F0H1E1IEG gene_region:82189196-82192436 functional_description:"Calreticulin 2 calcium-binding protein (AHRD V1 **** A8HMC0_CHLRE); contains Interpro domain(s) IPR009169 Calreticulin "	1	1	Solyc01g100380.1.1	M3(Oxidation)	CID	1	0	1	1	0	7.77e-05	600	588	4.14	0	2204.01	1	41	11	3168000	3	785.04	2353.11	0	0.37	48.36	4570	4570	MS2	34/76	34	76	EAH1.RAW
High	K	2	IGANEPSQLAINDNANGLAR	8316	Unambiguous	genomic_reference:SL2.31ch09 evidence_code:10F0H1E1IEG gene_region:2645029-2646904 functional_description:"Fructose-bisphosphate aldolase (AHRD V1 ***- Q2PYX3_SOLTU); contains Interpro domain(s) IPR000741 Fructose-bisphosphate aldolase, class-I "|genomic_reference:SL2.31ch10 evidence_code:10F1H1E1IEG gene_region:62683898-62686621 functional_description:"Fructose-bisphosphate aldolase (AHRD V1 ***…	2	2	Solyc09g009260.1.1;Solyc10g083570.1.1		CID	1	0	1	1	0	1.06e-09	611	631	4.73	0	2672.27	0	9	11	6062000	3	680.016	2038.03	0	0.86	30.58	2909	2909	MS2	34/76	34	76	EAH2.RAW
High	K	2	YSGALESFYEKFDPDFINIR	18537	Unambiguous	genomic_reference:SL2.31ch12 evidence_code:10F1H1E1IEG gene_region:47132509-47140184 functional_description:"V-type ATP synthase alpha chain (AHRD V1 ***- VATA_METTH); contains Interpro domain(s) IPR005725 ATPase, V1 complex, subunit A "	2	1	Solyc12g055800.1.1		CID	1	0	1	1	0	5.09e-08	693	668	4.44	0	1826.73	1	9	25	1394000	3	804.39	2411.16	0	0.08	68.15	6123	6123	MS2	34/76	34	76	EAH2.RAW
High	L	2	LYmEARPmEEGLAEAIDEGR	9460	Unambiguous	genomic_reference:SL2.31ch08 evidence_code:10F0H1E1IEG gene_region:49546658-49549476 functional_description:"Elongation factor EF-2 (AHRD V1 **** Q9SGT4_ARATH); contains Interpro domain(s) IPR000795 Protein synthesis factor, GTP-binding "	2	1	Solyc08g062920.1.1	M3(Oxidation); M8(Oxidation)	CID	1	0	1	1	0	3.19e-16	410	440	4.3	0	1492.65	0	26	25	432700	3	771.357	2312.06	0	0.97	35.32	3318	3318	MS2	34/76	34	76	EAH4.RAW
High	C	2	GLDVDSLYITHIQVNQAQK	12752	Unambiguous	genomic_reference:SL2.31ch06 evidence_code:10F1H1E1IEG gene_region:40675222-40676007 functional_description:"60S ribosomal protein L17 (AHRD V1 ***- D7KV33_ARALY); contains Interpro domain(s) IPR005721 Ribosomal protein L22/L17, eukaryotic/archaeal "	2	1	Solyc06g071880.1.1		CID	1	0	1	1	0	1.05e-08	529	486	3.84	0	1564.26	0	5	24	1110000	3	714.711	2142.12	0	0.07	44.9	4104	4104	MS2	34/72	34	72	AC3.RAW
High	D	2	LVSQKFEDPAEGEDVLVGK	9627	Unambiguous	genomic_reference:SL2.31ch12 evidence_code:10F1H1E1IEG gene_region:47132509-47140184 functional_description:"V-type ATP synthase alpha chain (AHRD V1 ***- VATA_METTH); contains Interpro domain(s) IPR005725 ATPase, V1 complex, subunit A "	1	1	Solyc12g055800.1.1		CID	1	0	1	1	0	2.09e-08	632	594	4.02	0	1822.14	1	29	17	2709000	3	687.357	2060.06	0	0.29	33.67	3094	3094	MS2	34/72	34	72	AH2.RAW
High	H	2	LVSQKFEDPAEGEDVLVGK	9627	Unambiguous	genomic_reference:SL2.31ch12 evidence_code:10F1H1E1IEG gene_region:47132509-47140184 functional_description:"V-type ATP synthase alpha chain (AHRD V1 ***- VATA_METTH); contains Interpro domain(s) IPR005725 ATPase, V1 complex, subunit A "	1	1	Solyc12g055800.1.1		CID	1	0	1	1	0	1.02e-06	632	594	4.32	0	1444.57	1	17	17	2907000	3	687.357	2060.06	0	0.73	35.81	3387	3387	MS2	34/72	34	72	EAC3_150410225534.RAW
High	K	2	SSLmLHIDGSGPTAEDIGR	9329	Unambiguous	genomic_reference:SL2.31ch05 evidence_code:10F1H1E1IEG gene_region:5715526-5720889 functional_description:"Mitochondrial processing peptidase beta subunit (AHRD V1 ***- Q9AXQ2_CUCME); contains Interpro domain(s) IPR011237 Peptidase M16, core "	1	1	Solyc05g012480.1.1	M4(Oxidation)	CID	1	0	1	1	0	9.88e-08	577	581	3.46	0	1622.91	0	19	25	1200000	3	657.986	1971.94	0	-0.69	33.67	3182	3182	MS2	34/72	34	72	EAH2.RAW
High	K	2	LVSQKFEDPAEGEDVLVGK	9627	Unambiguous	genomic_reference:SL2.31ch12 evidence_code:10F1H1E1IEG gene_region:47132509-47140184 functional_description:"V-type ATP synthase alpha chain (AHRD V1 ***- VATA_METTH); contains Interpro domain(s) IPR005725 ATPase, V1 complex, subunit A "	1	1	Solyc12g055800.1.1		CID	1	0	1	1	0	7.79e-10	651	607	5.2	0	1863.45	1	36	11	3732000	3	687.357	2060.06	0	0.91	34.63	3267	3267	MS2	34/72	34	72	EAH2.RAW
High	K	2	VDQGTLFDLILAANYLNIK	21259	Unambiguous	genomic_reference:SL2.31ch01 evidence_code:10F1H1E1IEG gene_region:89618410-89620055 functional_description:"Skp1 (AHRD V1 ***- Q49HP3_CAPAN); contains Interpro domain(s) IPR016897 E3 ubiquitin ligase, SCF complex, Skp subunit "|genomic_reference:SL2.31ch11 evidence_code:10F1H1E1IEG gene_region:34423195-34425524 functional_description:"SKP1 (AHRD V1 ***- Q68GS0_TOBAC); contains Interpro domain(s)…	2	1	Solyc11g042930.1.1		CID	1	0	1	1	0	3.22e-07	290	257	4.5	0	2237.42	0	17	25	221600	3	707.725	2121.16	0	0.33	86.75	7663	7663	MS2	34/72	34	72	EAH2.RAW
High	B	2	YAADEDAFFADYAEAHLK	14432	Unambiguous	genomic_reference:SL2.31ch06 evidence_code:10F1H1E1IEG gene_region:182627-184940 functional_description:"Ascorbate peroxidase (AHRD V1 ***- Q9SMD3_SOLLC); contains Interpro domain(s) IPR019793 Peroxidases heam-ligand binding site IPR019794 Peroxidase, active site IPR002016 Haem peroxidase, plant/fungal/bacterial "	2	1	Solyc06g005160.1.1		CID	1	0	1	1	0	1.2e-08	290	274	3.94	0	682.48	0	4	12	4277000	3	682.974	2046.91	0	0.33	51.27	4654	4654	MS2	34/68	34	68	AC2.RAW
High	H	2	VFEVSLADLQKDEDQAFR	15460	Unambiguous	genomic_reference:SL2.31ch03 evidence_code:10F1H1E1IEG gene_region:53730005-53732068 functional_description:"40S ribosomal protein S1 (AHRD V1 ***- RS3A_LENED); contains Interpro domain(s) IPR001593 Ribosomal protein S3Ae "|genomic_reference:SL2.31ch06 evidence_code:10F1H1E1IEG gene_region:41101725-41104317 functional_description:"40S ribosomal protein S1 (AHRD V1 ***- RS3A_LACBS); contains Inter…	2	2	Solyc03g097900.1.1;Solyc06g072490.1.1		CID	1	0	1	1	0	6.03e-07	676	685	3.28	0	1455.53	1	3	24	1013000	3	704.021	2110.05	0	1.17	56.06	5130	5130	MS2	34/68	34	68	EAC3_150410225534.RAW
High	I	2	VFEVSLADLQKDEDQAFR	15460	Unambiguous	genomic_reference:SL2.31ch03 evidence_code:10F1H1E1IEG gene_region:53730005-53732068 functional_description:"40S ribosomal protein S1 (AHRD V1 ***- RS3A_LENED); contains Interpro domain(s) IPR001593 Ribosomal protein S3Ae "|genomic_reference:SL2.31ch06 evidence_code:10F1H1E1IEG gene_region:41101725-41104317 functional_description:"40S ribosomal protein S1 (AHRD V1 ***- RS3A_LACBS); contains Inter…	2	2	Solyc03g097900.1.1;Solyc06g072490.1.1		CID	1	0	1	1	0	1.28e-07	643	645	3.14	0	1532.83	1	6	25	718300	3	704.02	2110.04	0	-0.13	55.19	5058	5058	MS2	34/68	34	68	EAC4_150411011441.RAW
High	B	2	DRYIPDDAMIEGSHGLR	7045	Unambiguous	genomic_reference:SL2.31ch10 evidence_code:10F0H1E0IEG gene_region:64082694-64085929 functional_description:"Beta-fructofuranosidase insoluble isoenzyme 2 (AHRD V1 **-* B6U1H5_MAIZE); contains Interpro domain(s) IPR001362 Glycoside hydrolase, family 32 "	1	1	Solyc10g085640.1.1		CID	1	0	1	1	0	5.37e-06	539	546	4.6	0	2030.11	1	28	25	924000	3	648.979	1944.92	0	0.21	32.08	3011	3011	MS2	34/64	34	64	AC2.RAW
High	D	2	VKDELVLDGNDIELVSR	12186	Unambiguous	genomic_reference:SL2.31ch12 evidence_code:10F1H1E1IEG gene_region:63856222-63858136 functional_description:"Ribosomal L9-like protein (AHRD V1 ***- B3TLR1_ELAGV); contains Interpro domain(s) IPR002359 Ribosomal protein L6, conserved site-2 "	3	1	Solyc12g096700.1.1		CID	1	0	1	1	0	6.71e-09	423	449	5.12	0	1849.53	1	11	17	1577000	3	638.678	1914.02	0	0.36	42.77	3882	3882	MS2	34/64	34	64	AH2.RAW
High	G	2	DRYIPDDAMIEGSHGLR	7045	Unambiguous	genomic_reference:SL2.31ch10 evidence_code:10F0H1E0IEG gene_region:64082694-64085929 functional_description:"Beta-fructofuranosidase insoluble isoenzyme 2 (AHRD V1 **-* B6U1H5_MAIZE); contains Interpro domain(s) IPR001362 Glycoside hydrolase, family 32 "	1	1	Solyc10g085640.1.1		CID	1	0	1	1	0	3.15e-16	532	535	5.81	0	1887.98	1	18	17	2872000	3	648.98	1944.93	0	0.87	29	2788	2788	MS2	34/64	34	64	EAC2.RAW
High	L	2	VKDELVLDGNDIELVSR	12186	Unambiguous	genomic_reference:SL2.31ch12 evidence_code:10F1H1E1IEG gene_region:63856222-63858136 functional_description:"Ribosomal L9-like protein (AHRD V1 ***- B3TLR1_ELAGV); contains Interpro domain(s) IPR002359 Ribosomal protein L6, conserved site-2 "	3	1	Solyc12g096700.1.1		CID	1	0	1	1	0	3.19e-16	426	450	4.3	0	2198.15	1	14	25	373300	3	638.678	1914.02	0	0.27	45.86	4234	4234	MS2	34/64	34	64	EAH4.RAW
High	C	2	LLWLLDNVEGLNEAVK	19189	Unambiguous	genomic_reference:SL2.31ch03 evidence_code:10F0H1E1IEG gene_region:60691306-60693886 functional_description:"Glycerol kinase (AHRD V1 ***- Q6RUF8_SOYBN); contains Interpro domain(s) IPR005999 Glycerol kinase "	1	1	Solyc03g117490.1.1		CID	1	0	1	1	0	1.12e-10	341	311	5.04	0	2156.23	0	0	25	46700	3	609.34	1826.01	0	0.39	71	6243	6243	MS2	34/60	34	60	AC3.RAW
High	A	2	NVDSSDYSPLEQSGNGVYLVNLSPGSmmAPHVNPSAIEYGVVLK	16577	Unambiguous	genomic_reference:SL2.31ch06 evidence_code:10F0H1E0IEG gene_region:43098487-43100345 functional_description:"Vicilin (Fragment) (AHRD V1 *--- Q41726_ZAMFU); contains Interpro domain(s) IPR011051 Cupin, RmlC-type "	1	1	Solyc06g075260.1.1	M27(Oxidation); M28(Oxidation)	CID	1	0	1	1	0	1.18e-06	612	635	3.87	0	586.56	0	0	25	605600	3	1556.42	4667.23	0	0.82	59.97	5352	5352	MS2	34/172	34	172	AC1.RAW
High	F	2	QAFDEAIAELDTLGEESYKDSTLImQLLR	21966	Unambiguous	genomic_reference:SL2.31ch04 evidence_code:10F1H1E1IEG gene_region:4428755-4429971 functional_description:"14-3-3 protein beta/alpha-1 (AHRD V1 **-- 143B1_ONCMY); contains Interpro domain(s) IPR000308 14-3-3 protein "|genomic_reference:SL2.31ch04 evidence_code:10F0H1E1IEG gene_region:58093381-58094998 functional_description:"14-3-3 protein beta/alpha-B (AHRD V1 **-- 143BB_XENLA); contains Interpr…	4	4	Solyc04g012120.1.1;Solyc04g074510.1.1;Solyc11g010200.1.1;Solyc12g057110.1.1	M25(Oxidation)	CID	1	0	1	1	0	1.73e-05	688	648	4.22	0	426.96	1	4	25	207400	4	829.664	3315.63	0	0.75	96.98	8575	8575	MS2	34/168	34	168	AH4.RAW
High	J	2	FRTDLPTGGLANVASTFmNLHGYEAPSDYEPTLIEVVDN	20651	Unambiguous	genomic_reference:SL2.31ch07 evidence_code:10F1H1E1IEG gene_region:55219265-55224407 functional_description:"2 3-bisphosphoglycerate-independent phosphoglycerate mutase (AHRD V1 **** B9S1V6_RICCO); contains Interpro domain(s) IPR005995 Phosphoglycerate mutase, 2,3-bisphosphoglycerate-independent "	1	1	Solyc07g044840.1.1	M18(Oxidation)	CID	1	0	1	1	0	0.0197	650	641	3.94	0	758.98	1	0	25	541800	3	1424.01	4270.02	0	-1.12	73.19	6679	6679	MS2	34/152	34	152	EAH1.RAW
High	L	2	NPAYPDTLYVDPLIGPDTVSTmPDQALQAFIDHGSVAR	19456	Unambiguous	genomic_reference:SL2.31ch00 evidence_code:10F1H1E1IEG gene_region:5777009-5780213 functional_description:"Transaldolase (AHRD V1 ***- Q9FVH1_SOLLC); contains Interpro domain(s) IPR014634 Transaldolase, bacterial/plant type "	1	1	Solyc00g006800.1.1	M22(Oxidation)	CID	1	0	1	1	0	3.22e-15	661	622	3.04	0	441.18	0	3	25	219000	3	1367.67	4101	0	3.04	75.89	6770	6770	MS2	34/148	34	148	EAH4.RAW
High	L	2	SSSmFDPFSIDVFDPFRELGFPGTNSGESSAFANTR	124630	Unambiguous	genomic_reference:SL2.31ch06 evidence_code:10F1H1E1IEG gene_region:43951450-43951914 functional_description:"class I heat shock protein (AHRD V1 ***- Q69BI7_CARPA); contains Interpro domain(s) IPR002068 Heat shock protein Hsp20 "	1	1	Solyc06g076560.1.1	M4(Oxidation)	CID	1	0	1	1	0	1.74e-12	488	403	4.21	0	574.29	1	1	25	223000	3	1311.6	3932.78	0	1.6	88.02	7768	7768	MS2	34/140	34	140	EAH4.RAW
High	D	2	TVDTTGAGDAFVGSLLVSIAKDPSIFQDEEKLK	84417	Unambiguous	genomic_reference:SL2.31ch11 evidence_code:10F0H1E0IEG gene_region:34310265-34312777 functional_description:"5-dehydro-2-deoxygluconokinase (AHRD V1 **-- IOLC_GEOTN); contains Interpro domain(s) IPR011611 Carbohydrate/purine kinase "	1	1	Solyc11g042850.1.1		CID	1	0	1	1	0	1.59e-05	455	461	3.3	0	1021.68	2	13	25	277200	3	1151.27	3451.78	0	-0.94	77.47	6762	6762	MS2	34/128	34	128	AH2.RAW
High	H	2	ILLTSTSEVYGDPLIHPQDESYWGNVNPIGVR	16765	Unambiguous	genomic_reference:SL2.31ch04 evidence_code:10F1H1E1IEG gene_region:3868903-3871560 functional_description:"UDP-glucose 4-epimerase (AHRD V1 **-* D5RML8_9PROT); contains Interpro domain(s) IPR016040 NAD(P)-binding domain "	1	1	Solyc04g011400.1.1		CID	1	0	1	1	0	4.47e-05	588	610	4.3	0	1002.77	0	3	25	811100	3	1190.6	3569.79	0	0.62	66.38	6008	6008	MS2	34/124	34	124	EAC3_150410225534.RAW
High	A	2	APNLSNVISKPEPSTVAQDDEDVDETGVEPK	10174	Unambiguous	genomic_reference:SL2.31ch10 evidence_code:10F0H1E1IEG gene_region:61533717-61537084 functional_description:"Nascent polypeptide-associated complex alpha subunit-like protein (AHRD V1 ***- B6T903_MAIZE); contains Interpro domain(s) IPR016641 Nascent polypeptide-associated complex, alpha subunit "	2	1	Solyc10g081030.1.1		CID	1	0	1	1	0	1.31e-06	690	687	4.35	0	1657.11	0	0	25	1499000	3	1094.2	3280.57	0	0.72	36.68	3385	3385	MS2	34/120	34	120	AC1.RAW
High	A	2	WNYDGSSTGQASGEDSEVILYPQAIFKDPFR	18035	Unambiguous	genomic_reference:SL2.31ch05 evidence_code:10F0H1E1IEG gene_region:60677361-60680424 functional_description:"Glutamine synthetase (AHRD V1 ***- A9PB10_POPTR); contains Interpro domain(s) IPR008146 Glutamine synthetase, catalytic region "	1	1	Solyc05g051250.1.1		CID	1	0	1	1	0	1.4e-06	601	558	4.86	0	893.06	1	0	25	803600	3	1159.88	3477.62	0	-0.38	67.03	5935	5935	MS2	34/120	34	120	AC1.RAW
High	C	2	WNYDGSSTGQASGEDSEVILYPQAIFKDPFR	18035	Unambiguous	genomic_reference:SL2.31ch05 evidence_code:10F0H1E1IEG gene_region:60677361-60680424 functional_description:"Glutamine synthetase (AHRD V1 ***- A9PB10_POPTR); contains Interpro domain(s) IPR008146 Glutamine synthetase, catalytic region "	1	1	Solyc05g051250.1.1		CID	1	0	1	1	0	1.32e-05	604	579	4.56	0	967.39	1	1	25	270000	3	1159.88	3477.64	0.01	4.46	65.26	5779	5779	MS2	34/120	34	120	AC3.RAW
High	C	2	WNYDGSSTGQASGEDSEVILYPQAIFKDPFR	18035	Unambiguous	genomic_reference:SL2.31ch05 evidence_code:10F0H1E1IEG gene_region:60677361-60680424 functional_description:"Glutamine synthetase (AHRD V1 ***- A9PB10_POPTR); contains Interpro domain(s) IPR008146 Glutamine synthetase, catalytic region "	1	1	Solyc05g051250.1.1		CID	1	0	1	1	0	1.32e-07	587	562	4.95	0	1071.05	1	3	25	549500	3	1159.88	3477.63	0	0.46	66.26	5860	5860	MS2	34/120	34	120	AC3.RAW
High	G	2	APNLSNVISKPEPSTVAQDDEDVDETGVEPK	10174	Unambiguous	genomic_reference:SL2.31ch10 evidence_code:10F0H1E1IEG gene_region:61533717-61537084 functional_description:"Nascent polypeptide-associated complex alpha subunit-like protein (AHRD V1 ***- B6T903_MAIZE); contains Interpro domain(s) IPR016641 Nascent polypeptide-associated complex, alpha subunit "	2	1	Solyc10g081030.1.1		CID	1	0	1	1	0	3.15e-16	678	689	5.64	0	1575.74	0	0	25	2055000	3	1094.2	3280.57	0	1.06	35.26	3340	3340	MS2	34/120	34	120	EAC2.RAW
High	J	2	WNYDGSSTGQASGEDSEVILYPQAIFKDPFR	18035	Unambiguous	genomic_reference:SL2.31ch05 evidence_code:10F0H1E1IEG gene_region:60677361-60680424 functional_description:"Glutamine synthetase (AHRD V1 ***- A9PB10_POPTR); contains Interpro domain(s) IPR008146 Glutamine synthetase, catalytic region "	1	1	Solyc05g051250.1.1		CID	1	0	1	1	0	0.000108	596	572	4.85	0	964.84	1	3	25	1386000	3	1159.88	3477.63	0	0.57	67.63	6216	6216	MS2	34/120	34	120	EAH1.RAW
High	D	2	TTGIVLDSGDGVSHTVPIYEGYALPHAILR	15317	Unambiguous	genomic_reference:SL2.31ch03 evidence_code:10F1H1E1IEG gene_region:44382119-44383552 functional_description:"Actin (AHRD V1 ***- Q7XZJ2_GOSHI); contains Interpro domain(s) IPR004000 Actin/actin-like "|genomic_reference:SL2.31ch10 evidence_code:10F1H1E1IEG gene_region:61080001-61081737 functional_description:"Actin (AHRD V1 ***- B5M4V6_TOBAC); contains Interpro domain(s) IPR004000 Actin/actin-like…	8	3	Solyc03g078400.1.1;Solyc01g104770.1.1;Solyc10g086460.1.1		CID	1	0	1	1	0	2.85e-08	450	440	5.63	0	1174.02	0	1	25	1317000	3	1051.22	3151.64	0	0.72	53.4	4777	4777	MS2	34/116	34	116	AH2.RAW
High	B	2	YGQDATNVGDEGGFAPNIQENKEGLELLK	12881	Unambiguous	genomic_reference:SL2.31ch09 evidence_code:10F1H1E1IEG gene_region:2371333-2375783 functional_description:"Enolase (AHRD V1 ***- C5J0G6_TOBAC); contains Interpro domain(s) IPR000941 Enolase "|genomic_reference:SL2.31ch10 evidence_code:10F1H1E1IEG gene_region:63994775-63999383 functional_description:"Enolase (AHRD V1 ***- C5J0G6_TOBAC); contains Interpro domain(s) IPR000941 Enolase "	2	2	Solyc09g009020.1.1;Solyc10g085550.1.1		CID	1	0	1	1	0	0.000144	671	724	4.44	0	738.9	1	1	25	923500	3	1036.17	3106.5	0	0.88	45.8	4193	4193	MS2	34/112	34	112	AC2.RAW
High	G	2	VSDVELEFLTGSNKIDDESAmSLWHPNLK	16510	Unambiguous	genomic_reference:SL2.31ch06 evidence_code:10F1H1E1IEG gene_region:41485353-41487653 functional_description:"Fructokinase-like (AHRD V1 **-* Q307Z3_SOLTU); contains Interpro domain(s) IPR002173 Carbohydrate/puine kinase, PfkB, conserved site "	1	1	Solyc06g073190.1.1	M21(Oxidation)	CID	1	0	1	1	0	2.32e-12	715	699	4.55	0	1150.28	1	0	25	792200	3	1097.54	3290.6	0	2.23	57.59	5223	5223	MS2	34/112	34	112	EAC2.RAW
High	K	2	HEELPIPIFSDLEPVYGSGSQLEEAQLR	18733	Unambiguous	genomic_reference:SL2.31ch01 evidence_code:10F1H1E1IEG gene_region:59253489-59258973 functional_description:"Galactokinase (AHRD V1 **** B6V3B9_CUCME); contains Interpro domain(s) IPR000705 Galactokinase "	1	1	Solyc01g058390.1.1		CID	1	0	1	1	0	1.46e-06	711	652	3.89	0	1452.93	0	7	25	739800	3	1051.86	3153.57	0	-0.41	69.74	6255	6255	MS2	34/108	34	108	EAH2.RAW
High	J	2	DKPLPSWSDSDVEEFIASDPLHGPTLR	17453	Unambiguous	genomic_reference:SL2.31ch06 evidence_code:10F1H1E1IEG gene_region:42013245-42016680 functional_description:"Unknown Protein (AHRD V1)"	1	1	Solyc06g073900.1.1		CID	1	0	1	1	0	7.08e-05	700	691	4.32	0	705.33	0	53	25	666100	3	1003.49	3008.46	0	-1.55	64.22	5930	5930	MS2	34/104	34	104	EAH1.RAW
High	A	2	TGDEKPVTISVDDGIRPNASVSDLAK	9744	Unambiguous	genomic_reference:SL2.31ch09 evidence_code:10F1H1E1IEG gene_region:66091223-66095670 functional_description:"3-ketoacyl CoA thiolase 2 (AHRD V1 **** C8YNG7_PETHY); contains Interpro domain(s) IPR002155 Thiolase "	1	1	Solyc09g091470.1.1		CID	1	0	1	1	0	1.69e-07	590	576	3.99	0	798.5	0	11	25	931100	3	895.462	2684.37	0	-1.07	35.2	3256	3256	MS2	34/100	34	100	AC1.RAW
High	B	2	VDKGTVELPGTDGETTTQGLDGLAER	10517	Unambiguous	genomic_reference:SL2.31ch09 evidence_code:10F0H1E1IEG gene_region:2645029-2646904 functional_description:"Fructose-bisphosphate aldolase (AHRD V1 ***- Q2PYX3_SOLTU); contains Interpro domain(s) IPR000741 Fructose-bisphosphate aldolase, class-I "	1	1	Solyc09g009260.1.1		CID	1	0	1	1	0	7.26e-07	651	652	5.03	0	1122.23	1	4	25	3711000	3	887.107	2659.31	0	0.49	37.42	3480	3480	MS2	34/100	34	100	AC2.RAW
High	J	2	YTIDLPDNISEIRPGQDVTVQTDTGK	13307	Unambiguous	genomic_reference:SL2.31ch12 evidence_code:10F0H1E1IEG gene_region:490745-498964 functional_description:"3-isopropylmalate dehydratase large subunit (AHRD V1 *--- LEUC_BACWK); contains Interpro domain(s) IPR006249 Aconitase/iron regulatory protein 2 "	1	1	Solyc12g005860.1.1		CID	1	0	1	1	0	0.000985	643	607	3.23	0	529.61	0	10	25	1886000	3	959.151	2875.44	0	1.7	49.06	4631	4631	MS2	34/100	34	100	EAH1.RAW
High	D	2	TNDLAGDGTTTSVVLAQGLIAEGVK	15814	Unambiguous	genomic_reference:SL2.31ch01 evidence_code:10F1H1E1IEG gene_region:33327275-33331326 functional_description:"chaperonin (AHRD V1 ***- B4VMY1_9CYAN); contains Interpro domain(s) IPR001844 Chaperonin Cpn60 "	1	1	Solyc01g028810.1.1		CID	1	0	1	1	0	1.56e-09	456	509	5.34	0	1180.84	0	12	25	1295000	3	810.763	2430.27	0	0.49	55.63	4962	4962	MS2	33/96	33	96	AH2.RAW
High	H	2	TNDLAGDGTTTSVVLAQGLIAEGVK	15814	Unambiguous	genomic_reference:SL2.31ch01 evidence_code:10F1H1E1IEG gene_region:33327275-33331326 functional_description:"chaperonin (AHRD V1 ***- B4VMY1_9CYAN); contains Interpro domain(s) IPR001844 Chaperonin Cpn60 "	1	1	Solyc01g028810.1.1		CID	1	0	1	1	0	2.18e-08	466	522	5.82	0	1326.52	0	23	25	985700	3	810.761	2430.27	0	-1.1	57.2	5226	5226	MS2	33/96	33	96	EAC3_150410225534.RAW
High	A	2	ELDYLVGAVSNPQKPFAAIVGGSK	15602	Unambiguous	genomic_reference:SL2.31ch07 evidence_code:10F1H1E1IEG gene_region:65212571-65215004 functional_description:"Phosphoglycerate kinase (AHRD V1 ***- Q2VCK2_SOLTU); contains Interpro domain(s) IPR001576 Phosphoglycerate kinase "	1	1	Solyc07g066600.1.1		CID	1	0	1	1	0	1.18e-08	390	355	3.68	0	1301.87	0	3	23	2183000	3	820.776	2460.31	0	0.01	56.32	5049	5049	MS2	33/92	33	92	AC1.RAW
High	C	2	SDVSNVVHADEFEYKDPVDGSVSK	9499	Unambiguous	genomic_reference:SL2.31ch04 evidence_code:10F0H1E1IEG gene_region:31641900-31656873 functional_description:"Phosphoglucomutase (AHRD V1 **** Q9AUQ4_ORYSA); contains Interpro domain(s) IPR016055 Alpha-D-phosphohexomutase, alpha/beta/alpha I, II and III "	1	1	Solyc04g045340.1.1		CID	1	0	1	1	0	4.76e-08	526	582	4.87	0	1493.94	1	5	25	1548000	3	875.078	2623.22	0	1.62	33.64	3141	3141	MS2	33/92	33	92	AC3.RAW
High	D	2	VETGVIKPGmVVTFGPTGLTTEVK	34881	Unambiguous	genomic_reference:SL2.31ch06 evidence_code:10F0H1E1IEG gene_region:36374-37800 functional_description:"Elongation factor 1-alpha (AHRD V1 ***- Q8H9C0_SOLTU); contains Interpro domain(s) IPR004539 Translation elongation factor EF1A, eukaryotic and archaeal IPR000795 Protein synthesis factor, GTP-binding "	3	1	Solyc06g005060.1.1	M10(Oxidation)	CID	1	0	1	1	0	2.48e-09	333	304	4.72	0	1488.34	0	3	25	1452000	3	826.117	2476.34	0	0.13	44.15	3999	3999	MS2	33/92	33	92	AH2.RAW
High	D	2	FGNIELSPASGILNYGQGLFEGLK	19927	Rejected	genomic_reference:SL2.31ch03 evidence_code:10F0H1E1IEG gene_region:11507825-11514153 functional_description:"Branched-chain amino acid aminotransferase (AHRD V1 **** Q9SNY9_SOLTU); contains Interpro domain(s) IPR005786 Branched-chain amino acid aminotransferase II "	1	0			CID		0.0052	2	2	0	3.96e-06	502	524	3.86	0	1469.99	0	34	25	129300	3	842.109	2524.31	0	1.93	74.86	6548	6548	MS2	33/92	33	92	AH2.RAW
High	K	2	AGDSSAEELATATQVQGPYLPITR	13090	Unambiguous	genomic_reference:SL2.31ch08 evidence_code:10F1H1E1IEG gene_region:56989651-56990657 functional_description:"60S ribosomal protein L13 (AHRD V1 ***- Q3HRY7_SOLTU); contains Interpro domain(s) IPR001380 Ribosomal protein L13e "	1	1	Solyc08g075700.1.1		CID	1	0	1	1	0	2.83e-07	694	665	4.59	0	1350.34	0	6	25	3028000	3	825.75	2475.24	0	-0.04	47.11	4346	4346	MS2	33/92	33	92	EAH2.RAW
High	A	2	GLLGDKANLSIYDPQVSEDQIQR	12279	Unambiguous	genomic_reference:SL2.31ch02 evidence_code:10F0H1E1IEG gene_region:31886439-31888009 functional_description:"UDP-D-glucose dehydrogenase (AHRD V1 ***- D2WK25_GOSHI); contains Interpro domain(s) IPR014028 UDP-glucose/GDP-mannose dehydrogenase, dimerisation and substrate-binding "	1	1	Solyc02g067080.1.1		CID	1	0	1	1	0	2.88e-08	632	656	4.87	0	1770.78	1	4	25	1966000	3	853.773	2559.31	0	0.07	44.32	4042	4042	MS2	33/88	33	88	AC1.RAW
High	B	2	ILDWADVINAHIISGPGIVDGLK	19692	Unambiguous	genomic_reference:SL2.31ch11 evidence_code:10F0H1E1IEG gene_region:50518935-50523650 functional_description:"Orotidine 5&apos-phosphate decarboxylase (Orotate phosphoribosyltransferase) (AHRD V1 **** C4QAV6_SCHMA); contains Interpro domain(s) IPR001754 Orotidine 5'-phosphate decarboxylase, core "	1	1	Solyc11g068830.1.1		CID	1	0	1	1	0	1.91e-07	249	260	3.67	0	788.81	0	3	25	364100	3	806.113	2416.33	0	0.85	72.86	6438	6438	MS2	33/88	33	88	AC2.RAW
High	C	2	AILGESNEFVGDKVAYALSQGLK	16917	Unambiguous	genomic_reference:SL2.31ch04 evidence_code:10F0H1E1IEG gene_region:3944492-3948735 functional_description:"Triosephosphate isomerase (AHRD V1 **** Q38JI4_SOLTU); contains Interpro domain(s) IPR000652 Triosephosphate isomerase "	1	1	Solyc04g011510.1.1		CID	1	0	1	1	0	3.41e-08	460	439	4.87	0	1398.55	1	21	24	1084000	3	803.761	2409.27	0	0.72	60.55	5396	5396	MS2	33/88	33	88	AC3.RAW
High	F	2	AILGESNEFVGDKVAYALSQGLK	16917	Unambiguous	genomic_reference:SL2.31ch04 evidence_code:10F0H1E1IEG gene_region:3944492-3948735 functional_description:"Triosephosphate isomerase (AHRD V1 **** Q38JI4_SOLTU); contains Interpro domain(s) IPR000652 Triosephosphate isomerase "	1	1	Solyc04g011510.1.1		CID	1	0	1	1	0	8.65e-11	432	413	4.75	0	1494.85	1	18	25	414900	3	803.761	2409.27	0	1.55	64.14	5815	5815	MS2	33/88	33	88	AH4.RAW
High	L	2	AILGESNEFVGDKVAYALSQGLK	16917	Unambiguous	genomic_reference:SL2.31ch04 evidence_code:10F0H1E1IEG gene_region:3944492-3948735 functional_description:"Triosephosphate isomerase (AHRD V1 **** Q38JI4_SOLTU); contains Interpro domain(s) IPR000652 Triosephosphate isomerase "	1	1	Solyc04g011510.1.1		CID	1	0	1	1	0	3.19e-16	441	421	4.78	0	1298.22	1	44	25	1037000	3	803.761	2409.27	0	1.4	63.99	5774	5774	MS2	33/88	33	88	EAH4.RAW
High	A	2	KDLYGNIVLSGGTTmFPGIADR	13482	Unambiguous	genomic_reference:SL2.31ch10 evidence_code:10F1H1E1IEG gene_region:61080001-61081737 functional_description:"Actin (AHRD V1 ***- B5M4V6_TOBAC); contains Interpro domain(s) IPR004000 Actin/actin-like "|genomic_reference:SL2.31ch01 evidence_code:10F0H1E1IEG gene_region:84898357-84900149 functional_description:"Actin (AHRD V1 ***- Q6F4H4_TOBAC); contains Interpro domain(s) IPR004000 Actin/actin-like…	6	2	Solyc01g104770.1.1;Solyc11g065990.1.1	M15(Oxidation)	CID	1	0	1	1	0	3e-08	670	658	4.41	0	1067.11	1	12	20	2247000	3	781.067	2341.19	0	0.7	48.49	4393	4393	MS2	33/84	33	84	AC1.RAW
High	B	2	LIGEAADLMQEVAVETFGAmAK	21469	Unambiguous	genomic_reference:SL2.31ch04 evidence_code:10F1H1E1IEG gene_region:49587422-49595735 functional_description:"26S proteasome non-ATPase regulatory subunit 12 (AHRD V1 ***- B5X386_SALSA); contains Interpro domain(s) IPR000717 Proteasome component region PCI "	1	1	Solyc04g051370.1.1	M20(Oxidation)	CID	1	0	1	1	0	6.07e-08	592	569	4.45	0	2367.31	0	30	25	155900	3	770.715	2310.13	0	-1.7	73.78	6515	6515	MS2	33/84	33	84	AC2.RAW
High	C	2	DLQDDFMGGAEIIKSDPVVSFR	17258	Unambiguous	genomic_reference:SL2.31ch08 evidence_code:10F0H1E1IEG gene_region:49546658-49549476 functional_description:"Elongation factor EF-2 (AHRD V1 **** Q9SGT4_ARATH); contains Interpro domain(s) IPR000795 Protein synthesis factor, GTP-binding "	2	1	Solyc08g062920.1.1		CID	1	0	1	1	0	5.2e-07	677	669	4.27	0	1573.86	1	11	25	905200	3	813.734	2439.19	0	0.6	62.13	5525	5525	MS2	33/84	33	84	AC3.RAW
High	F	2	VVVDVGAGSGILSLFAAQAGAK	122247	Unambiguous	genomic_reference:SL2.31ch05 evidence_code:10F0H1E1IEG gene_region:63345858-63354658 functional_description:"Arginine N-methyltransferase family protein (AHRD V1 ***- D7L611_ARALY); contains Interpro domain(s) IPR007848 Methyltransferase small "	1	1	Solyc05g054240.1.1		CID	1	0	1	1	0	2.56e-11	240	226	4.45	0	1756.73	0	31	25	49520	3	677.383	2030.13	0	3.35	71.69	6438	6438	MS2	33/84	33	84	AH4.RAW
High	G	2	DLQDDFMGGAEIIKSDPVVSFR	17258	Unambiguous	genomic_reference:SL2.31ch08 evidence_code:10F0H1E1IEG gene_region:49546658-49549476 functional_description:"Elongation factor EF-2 (AHRD V1 **** Q9SGT4_ARATH); contains Interpro domain(s) IPR000795 Protein synthesis factor, GTP-binding "	2	1	Solyc08g062920.1.1		CID	1	0	1	1	0	3.15e-16	660	659	4.14	0	1315.92	1	13	25	1387000	3	813.734	2439.19	0	0.23	61.84	5574	5574	MS2	33/84	33	84	EAC2.RAW
High	G	2	LIGEAADLMQEVAVETFGAmAK	21469	Unambiguous	genomic_reference:SL2.31ch04 evidence_code:10F1H1E1IEG gene_region:49587422-49595735 functional_description:"26S proteasome non-ATPase regulatory subunit 12 (AHRD V1 ***- B5X386_SALSA); contains Interpro domain(s) IPR000717 Proteasome component region PCI "	1	1	Solyc04g051370.1.1	M20(Oxidation)	CID	1	0	1	1	0	3.15e-16	587	560	4.83	0	1829.3	0	22	25	429600	3	770.716	2310.13	0	-0.44	74.35	6606	6606	MS2	33/84	33	84	EAC2.RAW
High	J	2	SGETEDTFIADLAVGLSTGQIK	19762	Unambiguous	genomic_reference:SL2.31ch09 evidence_code:10F1H1E1IEG gene_region:2371333-2375783 functional_description:"Enolase (AHRD V1 ***- C5J0G6_TOBAC); contains Interpro domain(s) IPR000941 Enolase "|genomic_reference:SL2.31ch10 evidence_code:10F1H1E1IEG gene_region:63994775-63999383 functional_description:"Enolase (AHRD V1 ***- C5J0G6_TOBAC); contains Interpro domain(s) IPR000941 Enolase "	2	2	Solyc09g009020.1.1;Solyc10g085550.1.1		CID	1	0	1	1	0	0.00133	631	657	3.7	0	1398.11	0	20	25	1757000	3	751.382	2252.13	0	0.38	75.09	6834	6834	MS2	33/84	33	84	EAH1.RAW
High	K	2	VGDESYESFSAEKEAILSSLAR	15616	Unambiguous	genomic_reference:SL2.31ch06 evidence_code:10F0H1E1IEG gene_region:36234655-36238685 functional_description:"Alanine aminotransferase (AHRD V1 **** Q6VEJ5_CAPAN); contains Interpro domain(s) IPR004839 Aminotransferase, class I and II "	1	1	Solyc06g063090.1.1		CID	1	0	1	1	0	1.37e-07	636	685	4.32	0	1848.6	1	4	25	1506000	3	796.724	2388.16	0	-0.04	55.59	5065	5065	MS2	33/84	33	84	EAH2.RAW
High	K	2	DLQDDFMGGAEIIKSDPVVSFR	17258	Unambiguous	genomic_reference:SL2.31ch08 evidence_code:10F0H1E1IEG gene_region:49546658-49549476 functional_description:"Elongation factor EF-2 (AHRD V1 **** Q9SGT4_ARATH); contains Interpro domain(s) IPR000795 Protein synthesis factor, GTP-binding "	2	1	Solyc08g062920.1.1		CID	1	0	1	1	0	6.99e-08	665	662	4.2	0	1052.2	1	21	25	530200	3	813.734	2439.19	0	0.53	62.57	5654	5654	MS2	33/84	33	84	EAH2.RAW
High	K	2	VYLSADDLLLNLQDFNLDTTRK	19527	Unambiguous	genomic_reference:SL2.31ch10 evidence_code:10F1H1E1IEG gene_region:2276303-2278346 functional_description:"Prohibitin 1-like protein (AHRD V1 ***- Q9AXM0_BRANA); contains Interpro domain(s) IPR000163 Prohibitin "	1	1	Solyc10g008140.1.1		CID	1	0	1	1	0	8.96e-08	483	518	3.13	0	844.61	1	22	25	640200	3	856.45	2567.34	0	-0.06	72.99	6527	6527	MS2	33/84	33	84	EAH2.RAW
High	C	2	ALVVINPGNPTGQVLGEANQR	11666	Unambiguous	genomic_reference:SL2.31ch06 evidence_code:10F0H1E1IEG gene_region:36234655-36238685 functional_description:"Alanine aminotransferase (AHRD V1 **** Q6VEJ5_CAPAN); contains Interpro domain(s) IPR004839 Aminotransferase, class I and II "	1	1	Solyc06g063090.1.1		CID	1	0	1	1	0	4.17e-08	415	393	4.19	0	1511.94	0	4	24	1740000	3	716.391	2147.16	0	0.9	41.3	3801	3801	MS2	33/80	33	80	AC3.RAW
High	H	2	AGEDYDGGRDADDFVNFINEK	56765	Unambiguous	genomic_reference:SL2.31ch01 evidence_code:10F1H1E1IEG gene_region:82147812-82153647 functional_description:"Thioredoxin/protein disulfide isomerase (AHRD V1 **** Q2U681_ASPOR); contains Interpro domain(s) IPR005788 Disulphide isomerase "	1	1	Solyc01g100320.1.1		CID	1	0	1	1	0	8.42e-09	223	217	5.9	0	1689.45	1	34	21	1314000	3	783.009	2347.01	0	0.64	47.05	4363	4363	MS2	33/80	33	80	EAC3_150410225534.RAW
High	K	2	TVDTTGAGDAFVGSLLVSIAK	18841	Unambiguous	genomic_reference:SL2.31ch11 evidence_code:10F0H1E0IEG gene_region:34310265-34312777 functional_description:"5-dehydro-2-deoxygluconokinase (AHRD V1 **-- IOLC_GEOTN); contains Interpro domain(s) IPR011611 Carbohydrate/purine kinase "	1	1	Solyc11g042850.1.1		CID	1	0	1	1	0	2.76e-07	438	419	3.86	0	2107.11	0	41	25	460800	3	674.697	2022.08	0	0.24	70.27	6299	6299	MS2	33/80	33	80	EAH2.RAW
High	A	2	APmIDNPDFKDDPDLYVFPK	13140	Unambiguous	genomic_reference:SL2.31ch01 evidence_code:10F0H1E1IEG gene_region:82189196-82192436 functional_description:"Calreticulin 2 calcium-binding protein (AHRD V1 **** A8HMC0_CHLRE); contains Interpro domain(s) IPR009169 Calreticulin "	1	1	Solyc01g100380.1.1	M3(Oxidation)	CID	1	0	1	1	0	4.03e-07	581	565	4.76	0	2147.31	1	41	25	996400	3	785.039	2353.1	0	-1.27	47.24	4287	4287	MS2	33/76	33	76	AC1.RAW
High	A	2	DTFGPILVPSDKLWGAQTQR	14984	Unambiguous	genomic_reference:SL2.31ch09 evidence_code:10F1H1E1IEG gene_region:62645740-62653816 functional_description:"Fumarate hydratase class II (AHRD V1 ***- C5GAL1_AJEDR); contains Interpro domain(s) IPR005677 Fumarate hydratase, class II "	1	1	Solyc09g075450.1.1		CID	1	0	1	1	0	3.65e-08	530	536	4.24	0	1428.66	1	13	22	1234000	3	743.727	2229.17	0	0.36	53.92	4849	4849	MS2	33/76	33	76	AC1.RAW
High	B	2	YSGALESFYEKFDPDFINIR	18537	Unambiguous	genomic_reference:SL2.31ch12 evidence_code:10F1H1E1IEG gene_region:47132509-47140184 functional_description:"V-type ATP synthase alpha chain (AHRD V1 ***- VATA_METTH); contains Interpro domain(s) IPR005725 ATPase, V1 complex, subunit A "	2	1	Solyc12g055800.1.1		CID	1	0	1	1	0	6.31e-07	690	666	4.3	0	1815.08	1	24	25	211900	3	804.39	2411.16	0	-0.08	67.44	5995	5995	MS2	33/76	33	76	AC2.RAW
High	C	2	VSQMIEDHEPFEGQALLDAK	10284	Unambiguous	genomic_reference:SL2.31ch06 evidence_code:10F1H1E1IEG gene_region:6258168-6260708 functional_description:"Elongation factor 1-gamma (AHRD V1 ***- B7SDI2_ORYSJ); contains Interpro domain(s) IPR001662 Translation elongation factor EF1B, gamma chain, conserved "	1	1	Solyc06g011280.1.1		CID	1	0	1	1	0	2.64e-07	687	659	3.56	0	1881.33	0	34	22	790700	3	753.032	2257.08	0	0.17	40.94	3771	3771	MS2	33/76	33	76	AC3.RAW
High	C	2	DTFGPILVPSDKLWGAQTQR	14984	Unambiguous	genomic_reference:SL2.31ch09 evidence_code:10F1H1E1IEG gene_region:62645740-62653816 functional_description:"Fumarate hydratase class II (AHRD V1 ***- C5GAL1_AJEDR); contains Interpro domain(s) IPR005677 Fumarate hydratase, class II "	1	1	Solyc09g075450.1.1		CID	1	0	1	1	0	5.02e-09	519	536	4.69	0	1476.79	1	2	24	1475000	3	743.728	2229.17	0	0.77	52.92	4769	4769	MS2	33/76	33	76	AC3.RAW
High	D	2	LYmEARPmEEGLAEAIDEGR	9460	Unambiguous	genomic_reference:SL2.31ch08 evidence_code:10F0H1E1IEG gene_region:49546658-49549476 functional_description:"Elongation factor EF-2 (AHRD V1 **** Q9SGT4_ARATH); contains Interpro domain(s) IPR000795 Protein synthesis factor, GTP-binding "	2	1	Solyc08g062920.1.1	M3(Oxidation); M8(Oxidation)	CID	1	0	1	1	0	3.44e-09	412	436	4.31	0	1827.93	0	9	10	4858000	3	771.357	2312.06	0	0.73	32.94	3030	3030	MS2	33/76	33	76	AH2.RAW
High	D	2	FDDGLPPILTALEVLDNQIR	21890	Unambiguous	genomic_reference:SL2.31ch04 evidence_code:10F1H1E1IEG gene_region:1237570-1241219 functional_description:"ATP synthase subunit beta (AHRD V1 ***- O82722_NICSY); contains Interpro domain(s) IPR005722 ATPase, F1 complex, beta subunit "	1	1	Solyc04g007550.1.1		CID	1	0	1	1	0	1.6e-07	399	357	3.23	0	1339.88	0	1	25	1013000	3	747.071	2239.2	0	1.12	96.12	8263	8263	MS2	33/76	33	76	AH2.RAW
High	E	2	IGANEPSQLAINDNANGLAR	8316	Unambiguous	genomic_reference:SL2.31ch09 evidence_code:10F0H1E1IEG gene_region:2645029-2646904 functional_description:"Fructose-bisphosphate aldolase (AHRD V1 ***- Q2PYX3_SOLTU); contains Interpro domain(s) IPR000741 Fructose-bisphosphate aldolase, class-I "|genomic_reference:SL2.31ch10 evidence_code:10F1H1E1IEG gene_region:62683898-62686621 functional_description:"Fructose-bisphosphate aldolase (AHRD V1 ***…	2	2	Solyc09g009260.1.1;Solyc10g083570.1.1		CID	1	0	1	1	0	0.000744	596	601	3.97	0	1579	0	17	25	2030000	3	680.015	2038.03	0	0.23	33.71	3107	3107	MS2	33/76	33	76	AH3.RAW
High	F	2	FIVEAANHPTDPDADEILSK	9984	Unambiguous	genomic_reference:SL2.31ch05 evidence_code:10F0H1E1IEG gene_region:61565704-61570805 functional_description:"Glutamate dehydrogenase (AHRD V1 **** Q94IA5_BRANA); contains Interpro domain(s) IPR014362 Glutamate dehydrogenase "	1	1	Solyc05g052100.1.1		CID	1	0	1	1	0	1.61e-09	615	621	3.49	0	860.63	0	10	23	1810000	3	728.028	2182.07	0	1.1	38.14	3602	3602	MS2	33/76	33	76	AH4.RAW
High	F	2	NGVEALISSDLQGLSEYEQK	17969	Unambiguous	genomic_reference:SL2.31ch03 evidence_code:10F1H1E1IEG gene_region:59594458-59595696 functional_description:"Malate dehydrogenase (AHRD V1 **** O48906_MEDSA); contains Interpro domain(s) IPR010097 Malate dehydrogenase, NAD-dependent, eukaryotes and gamma proteobacteria "	1	1	Solyc03g115990.1.1		CID	1	0	1	1	0	1.02e-11	613	584	4.65	0	1720.66	0	28	25	162800	3	727.363	2180.07	0	0.92	68.99	6217	6217	MS2	33/76	33	76	AH4.RAW
High	G	2	YSGALESFYEKFDPDFINIR	18537	Unambiguous	genomic_reference:SL2.31ch12 evidence_code:10F1H1E1IEG gene_region:47132509-47140184 functional_description:"V-type ATP synthase alpha chain (AHRD V1 ***- VATA_METTH); contains Interpro domain(s) IPR005725 ATPase, V1 complex, subunit A "	2	1	Solyc12g055800.1.1		CID	1	0	1	1	0	3.15e-16	701	674	4.29	0	1569.68	1	32	21	1156000	3	804.39	2411.15	0	-0.53	67.02	6002	6002	MS2	33/76	33	76	EAC2.RAW
High	H	2	IGANEPSQLAINDNANGLAR	8316	Unambiguous	genomic_reference:SL2.31ch09 evidence_code:10F0H1E1IEG gene_region:2645029-2646904 functional_description:"Fructose-bisphosphate aldolase (AHRD V1 ***- Q2PYX3_SOLTU); contains Interpro domain(s) IPR000741 Fructose-bisphosphate aldolase, class-I "|genomic_reference:SL2.31ch10 evidence_code:10F1H1E1IEG gene_region:62683898-62686621 functional_description:"Fructose-bisphosphate aldolase (AHRD V1 ***…	2	2	Solyc09g009260.1.1;Solyc10g083570.1.1		CID	1	0	1	1	0	8.55e-06	614	616	3.9	0	1223.97	0	17	11	4257000	3	680.015	2038.03	0	-0.4	31.59	3008	3008	MS2	33/76	33	76	EAC3_150410225534.RAW
High	H	2	VSQmIEDHEPFEGQALLDAK	10284	Unambiguous	genomic_reference:SL2.31ch06 evidence_code:10F1H1E1IEG gene_region:6258168-6260708 functional_description:"Elongation factor 1-gamma (AHRD V1 ***- B7SDI2_ORYSJ); contains Interpro domain(s) IPR001662 Translation elongation factor EF1B, gamma chain, conserved "	1	1	Solyc06g011280.1.1	M4(Oxidation)	CID	1	0	1	1	0	1.23e-07	582	616	5.44	0	1830.37	0	17	22	1835000	3	758.364	2273.08	0	0.69	38.43	3617	3617	MS2	33/76	33	76	EAC3_150410225534.RAW
High	H	2	EAPAFVEQATEQQILVTGIK	14533	Unambiguous	genomic_reference:SL2.31ch04 evidence_code:10F1H1E1IEG gene_region:1237570-1241219 functional_description:"ATP synthase subunit beta (AHRD V1 ***- O82722_NICSY); contains Interpro domain(s) IPR005722 ATPase, F1 complex, beta subunit "|genomic_reference:SL2.31ch05 evidence_code:10F1H1E1IEG gene_region:2806055-2809657 functional_description:"ATP synthase subunit beta (AHRD V1 ***- O82722_NICSY); co…	2	2	Solyc04g007550.1.1;Solyc05g008460.1.1		CID	1	0	1	1	0	3.96e-07	458	413	4.48	0	2473.6	0	8	15	3189000	3	724.724	2172.16	0	0.8	52.89	4860	4860	MS2	33/76	33	76	EAC3_150410225534.RAW
High	J	2	IGANEPSQLAINDNANGLAR	8316	Unambiguous	genomic_reference:SL2.31ch09 evidence_code:10F0H1E1IEG gene_region:2645029-2646904 functional_description:"Fructose-bisphosphate aldolase (AHRD V1 ***- Q2PYX3_SOLTU); contains Interpro domain(s) IPR000741 Fructose-bisphosphate aldolase, class-I "|genomic_reference:SL2.31ch10 evidence_code:10F1H1E1IEG gene_region:62683898-62686621 functional_description:"Fructose-bisphosphate aldolase (AHRD V1 ***…	2	2	Solyc09g009260.1.1;Solyc10g083570.1.1		CID	1	0	1	1	0	9.31e-06	601	613	4.58	0	2017.77	0	13	8	6857000	3	680.016	2038.03	0	0.41	32.07	3123	3123	MS2	33/76	33	76	EAH1.RAW
High	J	2	YSGALESFYEKFDPDFINIR	18537	Unambiguous	genomic_reference:SL2.31ch12 evidence_code:10F1H1E1IEG gene_region:47132509-47140184 functional_description:"V-type ATP synthase alpha chain (AHRD V1 ***- VATA_METTH); contains Interpro domain(s) IPR005725 ATPase, V1 complex, subunit A "	2	1	Solyc12g055800.1.1		CID	1	0	1	1	0	4.17e-05	708	667	4.07	0	1682.89	1	29	25	1072000	3	804.391	2411.16	0	1.21	68.81	6316	6316	MS2	33/76	33	76	EAH1.RAW
High	K	2	APmIDNPDFKDDPDLYVFPK	13140	Unambiguous	genomic_reference:SL2.31ch01 evidence_code:10F0H1E1IEG gene_region:82189196-82192436 functional_description:"Calreticulin 2 calcium-binding protein (AHRD V1 **** A8HMC0_CHLRE); contains Interpro domain(s) IPR009169 Calreticulin "	1	1	Solyc01g100380.1.1	M3(Oxidation)	CID	1	0	1	1	0	1.2e-08	601	583	4.28	0	1950.47	1	36	24	1906000	3	785.04	2353.11	0	0.37	47.03	4339	4339	MS2	33/76	33	76	EAH2.RAW
High	L	2	FIVEAANHPTDPDADEILSK	9984	Unambiguous	genomic_reference:SL2.31ch05 evidence_code:10F0H1E1IEG gene_region:61565704-61570805 functional_description:"Glutamate dehydrogenase (AHRD V1 **** Q94IA5_BRANA); contains Interpro domain(s) IPR014362 Glutamate dehydrogenase "	1	1	Solyc05g052100.1.1		CID	1	0	1	1	0	3.19e-16	615	616	3.47	0	646.6	0	13	25	498700	3	728.028	2182.07	0	0.76	37.86	3540	3540	MS2	33/76	33	76	EAH4.RAW
High	A	2	GLDVDSLYITHIQVNQAQK	12752	Unambiguous	genomic_reference:SL2.31ch06 evidence_code:10F1H1E1IEG gene_region:40675222-40676007 functional_description:"60S ribosomal protein L17 (AHRD V1 ***- D7KV33_ARALY); contains Interpro domain(s) IPR005721 Ribosomal protein L22/L17, eukaryotic/archaeal "	2	1	Solyc06g071880.1.1		CID	1	0	1	1	0	2.12e-08	532	491	3.63	0	1796.8	0	23	25	1164000	3	714.711	2142.12	0	-0.02	45.97	4180	4180	MS2	33/72	33	72	AC1.RAW
High	C	2	LVSQKFEDPAEGEDVLVGK	9627	Unambiguous	genomic_reference:SL2.31ch12 evidence_code:10F1H1E1IEG gene_region:47132509-47140184 functional_description:"V-type ATP synthase alpha chain (AHRD V1 ***- VATA_METTH); contains Interpro domain(s) IPR005725 ATPase, V1 complex, subunit A "	1	1	Solyc12g055800.1.1		CID	1	0	1	1	0	2.04e-08	651	609	3.72	0	1794.92	1	39	21	1523000	3	687.357	2060.06	0	1.09	33.66	3143	3143	MS2	33/72	33	72	AC3.RAW
High	C	2	LLALIDDIYKYVDDVVEGR	65732	Unambiguous	genomic_reference:SL2.31ch11 evidence_code:10F1H1E1IEG gene_region:6453695-6462103 functional_description:"Eukaryotic translation initiation factor 3 subunit 5 (AHRD V1 ***- B4FRD9_MAIZE); contains Interpro domain(s) IPR000555 Mov34/MPN/PAD-1 "	1	1	Solyc11g013440.1.1		CID	1	0	1	1	0	3.05e-08	451	436	4.22	0	2501.24	1	5	25	122100	3	737.064	2209.18	0	0.4	97.78	8268	8268	MS2	33/72	33	72	AC3.RAW
High	G	2	FGIVEGLMTTVHSITATQK	41201	Unambiguous	genomic_reference:SL2.31ch05 evidence_code:10F0H1E0IEG gene_region:648534-651184 functional_description:"Glyceraldehyde-3-phosphate dehydrogenase (AHRD V1 **** Q9XG67_TOBAC); contains Interpro domain(s) IPR000173 Glyceraldehyde 3-phosphate dehydrogenase "|genomic_reference:SL2.31ch06 evidence_code:10F0H1E1IEG gene_region:40700509-40704055 functional_description:"Glyceraldehyde-3-phosphate dehydro…	4	2	Solyc05g005820.1.1;Solyc06g071920.1.1		CID	1	0	1	1	0	3.15e-16	539	541	3.25	0	1409.53	0	25	25	646100	3	678.362	2033.07	0	-0.47	69.65	6220	6220	MS2	33/72	33	72	EAC2.RAW
High	K	2	GLDVDSLYITHIQVNQAQK	12752	Unambiguous	genomic_reference:SL2.31ch06 evidence_code:10F1H1E1IEG gene_region:40675222-40676007 functional_description:"60S ribosomal protein L17 (AHRD V1 ***- D7KV33_ARALY); contains Interpro domain(s) IPR005721 Ribosomal protein L22/L17, eukaryotic/archaeal "	2	1	Solyc06g071880.1.1		CID	1	0	1	1	0	1.39e-07	500	471	3.48	0	1559.54	0	71	25	271900	3	714.713	2142.13	0	3.06	45.56	4214	4214	MS2	33/72	33	72	EAH2.RAW
High	A	2	VFEVSLADLQKDEDQAFR	15460	Unambiguous	genomic_reference:SL2.31ch03 evidence_code:10F1H1E1IEG gene_region:53730005-53732068 functional_description:"40S ribosomal protein S1 (AHRD V1 ***- RS3A_LENED); contains Interpro domain(s) IPR001593 Ribosomal protein S3Ae "|genomic_reference:SL2.31ch06 evidence_code:10F1H1E1IEG gene_region:41101725-41104317 functional_description:"40S ribosomal protein S1 (AHRD V1 ***- RS3A_LACBS); contains Inter…	2	2	Solyc03g097900.1.1;Solyc06g072490.1.1		CID	1	0	1	1	0	5.61e-09	638	643	4.7	0	1201.93	1	9	24	1397000	3	704.02	2110.04	0	-0.22	55.58	4986	4986	MS2	33/68	33	68	AC1.RAW
High	A	2	LLEVDPDGAILAIGDmMR	14760	Unambiguous	genomic_reference:SL2.31ch11 evidence_code:10F1H1E1IEG gene_region:2859715-2863853 functional_description:"Acyl- (AHRD V1 ***- Q4JIJ4_9ROSI); contains Interpro domain(s) IPR005067 Fatty acid desaturase, type 2 "	1	1	Solyc11g008680.1.1	M16(Oxidation)	CID	0.019	0	1	1	0	2.36e-07	616	619	3.68	0	1883.42	0	27	25	461900	3	648.997	1944.98	0	0.27	61.96	5517	5517	MS2	33/68	33	68	AC1.RAW
High	C	2	LLEVDPDGAILAIGDmMR	14760	Unambiguous	genomic_reference:SL2.31ch11 evidence_code:10F1H1E1IEG gene_region:2859715-2863853 functional_description:"Acyl- (AHRD V1 ***- Q4JIJ4_9ROSI); contains Interpro domain(s) IPR005067 Fatty acid desaturase, type 2 "	1	1	Solyc11g008680.1.1	M16(Oxidation)	CID	0.0176	0	1	1	0	1.07e-07	607	609	3.98	0	1752.52	0	15	25	560200	3	648.998	1944.98	0	1.02	61.07	5437	5437	MS2	33/68	33	68	AC3.RAW
High	D	2	HTDVLDAITQHLEIGSYR	38215	Unambiguous	genomic_reference:SL2.31ch07 evidence_code:10F1H1E1IEG gene_region:62455643-62461072 functional_description:"Phosphoenolpyruvate carboxylase 2 (AHRD V1 ***- Q9SCB2_SOLLC); contains Interpro domain(s) IPR015813 Pyruvate/Phosphoenolpyruvate kinase, catalytic core IPR001449 Phosphoenolpyruvate carboxylase "	3	1	Solyc07g062530.1.1		CID	1	0	1	1	0	9.8e-09	578	600	4.75	0	1882.97	0	12	25	1261000	3	690.021	2068.05	0	0.71	56.67	5050	5050	MS2	33/68	33	68	AH2.RAW
High	D	2	LLEVDPDGAILAIGDMmR	14760	Unambiguous	genomic_reference:SL2.31ch11 evidence_code:10F1H1E1IEG gene_region:2859715-2863853 functional_description:"Acyl- (AHRD V1 ***- Q4JIJ4_9ROSI); contains Interpro domain(s) IPR005067 Fatty acid desaturase, type 2 "	1	1	Solyc11g008680.1.1	M17(Oxidation)	CID		0.0293	2	2	0	1.38e-08	607	608	3.31	0	1914.31	0	30	25	245600	3	648.999	1944.98	0	2.53	60.89	5398	5398	MS2	33/68	33	68	AH2.RAW
High	F	2	FYAGRPIIVDFSPVTDFR	120287	Unambiguous	genomic_reference:SL2.31ch11 evidence_code:10F1H1E1IEG gene_region:49725190-49728911 functional_description:"Splicing factor U2af subunit (AHRD V1 ***- B6T7D3_MAIZE); contains Interpro domain(s) IPR009145 U2 auxiliary factor small subunit "	2	1	Solyc11g066830.1.1		CID	1	0	1	1	0	5.76e-13	533	554	3.94	0	1918.55	0	4	25	288900	3	700.702	2100.09	0	-0.02	62.47	5676	5676	MS2	33/68	33	68	AH4.RAW
High	J	2	YAADEDAFFADYAEAHLK	14432	Unambiguous	genomic_reference:SL2.31ch06 evidence_code:10F1H1E1IEG gene_region:182627-184940 functional_description:"Ascorbate peroxidase (AHRD V1 ***- Q9SMD3_SOLLC); contains Interpro domain(s) IPR019793 Peroxidases heam-ligand binding site IPR019794 Peroxidase, active site IPR002016 Haem peroxidase, plant/fungal/bacterial "	2	1	Solyc06g005160.1.1		CID	1	0	1	1	0	1.31e-05	307	295	3.71	0	792.96	0	17	14	2566000	3	682.974	2046.91	0	0.42	52.43	4922	4922	MS2	33/68	33	68	EAH1.RAW
High	K	2	LLEVDPDGAILAIGDmmR	14760	Unambiguous	genomic_reference:SL2.31ch11 evidence_code:10F1H1E1IEG gene_region:2859715-2863853 functional_description:"Acyl- (AHRD V1 ***- Q4JIJ4_9ROSI); contains Interpro domain(s) IPR005067 Fatty acid desaturase, type 2 "	1	1	Solyc11g008680.1.1	M16(Oxidation); M17(Oxidation)	CID	1	0	1	1	0	4.98e-08	676	626	3.19	0	1854.23	0	18	25	834300	3	654.329	1960.97	0	0.12	53.26	4869	4869	MS2	33/68	33	68	EAH2.RAW
High	K	2	HTDVLDAITQHLEIGSYR	38215	Unambiguous	genomic_reference:SL2.31ch07 evidence_code:10F1H1E1IEG gene_region:62455643-62461072 functional_description:"Phosphoenolpyruvate carboxylase 2 (AHRD V1 ***- Q9SCB2_SOLLC); contains Interpro domain(s) IPR015813 Pyruvate/Phosphoenolpyruvate kinase, catalytic core IPR001449 Phosphoenolpyruvate carboxylase "	3	1	Solyc07g062530.1.1		CID	1	0	1	1	0	1.19e-08	572	601	4.14	0	1992.23	0	31	25	578400	3	690.021	2068.05	0	0.71	57.76	5249	5249	MS2	33/68	33	68	EAH2.RAW
High	A	2	DRYIPDDAmIEGSHGLR	7045	Unambiguous	genomic_reference:SL2.31ch10 evidence_code:10F0H1E0IEG gene_region:64082694-64085929 functional_description:"Beta-fructofuranosidase insoluble isoenzyme 2 (AHRD V1 **-* B6U1H5_MAIZE); contains Interpro domain(s) IPR001362 Glycoside hydrolase, family 32 "	1	1	Solyc10g085640.1.1	M9(Oxidation)	CID	1	0	1	1	0	3.6e-08	453	415	3.99	0	1214.85	1	22	25	1121000	3	654.311	1960.92	0	0.72	26.29	2461	2461	MS2	33/64	33	64	AC1.RAW
High	B	2	VGYPVITDALDALYLK	20261	Unambiguous	genomic_reference:SL2.31ch05 evidence_code:10F0H1E1IEG gene_region:3737371-3743069 functional_description:"Dihydrolipoyllysine-residue acetyltransferase component of pyruvate dehydrogenase complex (AHRD V1 **** A5GUY8_SYNR3); contains Interpro domain(s) IPR001078 2-oxoacid dehydrogenase acyltransferase, catalytic domain "	1	1	Solyc05g009530.1.1		CID	1	0	1	1	0	1.23e-08	315	296	4.23	0	2463.87	0	23	25	83930	3	584.326	1750.96	0	-0.18	77.33	6818	6818	MS2	33/60	33	60	AC2.RAW
High	G	2	DAEGQDVLLFIDNIFR	21694	Unambiguous	genomic_reference:SL2.31ch02 evidence_code:10F0H1E0IEG gene_region:47123903-47126760 functional_description:"ATP synthase subunit beta (AHRD V1 ***- Q9ZR78_NICSY); contains Interpro domain(s) IPR005722 ATPase, F1 complex, beta subunit "|genomic_reference:SL2.31ch04 evidence_code:10F1H1E1IEG gene_region:1237570-1241219 functional_description:"ATP synthase subunit beta (AHRD V1 ***- O82722_NICSY); …	3	3	Solyc02g091130.1.1;Solyc04g007550.1.1;Solyc05g008460.1.1		CID	1	0	1	1	0	3.15e-16	657	617	4.84	0	2408.66	0	5	25	550100	3	622.32	1864.95	0	0.56	92.43	8089	8089	MS2	33/60	33	60	EAC2.RAW
High	B	2	LGDDEFGHMLAGILK	7862	Unambiguous	genomic_reference:SL2.31ch06 evidence_code:10F1H1E1IEG gene_region:41485353-41487653 functional_description:"Fructokinase-like (AHRD V1 **-* Q307Z3_SOLTU); contains Interpro domain(s) IPR002173 Carbohydrate/puine kinase, PfkB, conserved site "	1	1	Solyc06g073190.1.1		CID	1	0	1	1	0	1.58e-06	563	598	3.9	0	978.57	0	0	25	996500	3	539.276	1615.81	0	-0.7	63.55	5674	5674	MS2	33/56	33	56	AC2.RAW
High	F	2	IAGGPLGEVVDPLYPGGSFDPLGLAEDPEAFAELKVK	124153	Unambiguous	genomic_reference:SL2.31ch02 evidence_code:10F0H1E1IEG gene_region:35080156-35080953 functional_description:"Chlorophyll a/b binding protein (AHRD V1 **** Q41422_SOLTU); contains Interpro domain(s) IPR001344 Chlorophyll A-B binding protein "	6	1	Solyc02g070940.1.1		CID	1	0	1	1	0	8.05e-05	402	385	4.18	0	556.55	1	0	25	249000	3	1256.65	3767.95	0	1.09	83.57	7413	7413	MS2	33/144	33	144	AH4.RAW
High	A	2	ALDWGPGGGPDLIVDDGGDATLLIHEGVKAEEEYAK	18671	Unambiguous	genomic_reference:SL2.31ch12 evidence_code:10F0H1E1IEG gene_region:64330367-64332543 functional_description:"Adenosylhomocysteinase (AHRD V1 ***- A1KYB0_TOBAC); contains Interpro domain(s) IPR000043 S-adenosyl-L-homocysteine hydrolase "	1	1	Solyc12g098500.1.1		CID	1	0	1	1	0	2.98e-07	638	618	3.8	0	966.56	1	2	25	555000	3	1236.61	3707.81	0	-0.2	69.63	6148	6148	MS2	33/140	33	140	AC1.RAW
High	H	2	ALDWGPGGGPDLIVDDGGDATLLIHEGVKAEEEYAK	18671	Unambiguous	genomic_reference:SL2.31ch12 evidence_code:10F0H1E1IEG gene_region:64330367-64332543 functional_description:"Adenosylhomocysteinase (AHRD V1 ***- A1KYB0_TOBAC); contains Interpro domain(s) IPR000043 S-adenosyl-L-homocysteine hydrolase "	1	1	Solyc12g098500.1.1		CID	1	0	1	1	0.00031	0.000377	646	655	3.65	0	749.62	1	6	25	659300	3	1236.61	3707.82	0	2.46	70.95	6386	6386	MS2	33/140	33	140	EAC3_150410225534.RAW
High	A	2	ILLTSTSEVYGDPLIHPQDESYWGNVNPIGVR	16765	Unambiguous	genomic_reference:SL2.31ch04 evidence_code:10F1H1E1IEG gene_region:3868903-3871560 functional_description:"UDP-glucose 4-epimerase (AHRD V1 **-* D5RML8_9PROT); contains Interpro domain(s) IPR016040 NAD(P)-binding domain "	1	1	Solyc04g011400.1.1		CID	1	0	1	1	0	1.9e-07	593	608	4.3	0	909.15	0	4	25	755800	3	1190.6	3569.79	0	0	62.3	5545	5545	MS2	33/124	33	124	AC1.RAW
High	B	2	WNYDGSSTGQASGEDSEVILYPQAIFKDPFR	18035	Unambiguous	genomic_reference:SL2.31ch05 evidence_code:10F0H1E1IEG gene_region:60677361-60680424 functional_description:"Glutamine synthetase (AHRD V1 ***- A9PB10_POPTR); contains Interpro domain(s) IPR008146 Glutamine synthetase, catalytic region "	1	1	Solyc05g051250.1.1		CID	1	0	1	1	0	0.000108	602	573	3.86	0	985.72	1	0	25	574400	3	1159.88	3477.63	0	1.2	66.06	5881	5881	MS2	33/120	33	120	AC2.RAW
High	D	2	APNLSNVISKPEPSTVAQDDEDVDETGVEPK	10174	Unambiguous	genomic_reference:SL2.31ch10 evidence_code:10F0H1E1IEG gene_region:61533717-61537084 functional_description:"Nascent polypeptide-associated complex alpha subunit-like protein (AHRD V1 ***- B6T903_MAIZE); contains Interpro domain(s) IPR016641 Nascent polypeptide-associated complex, alpha subunit "	2	1	Solyc10g081030.1.1		CID	1	0	1	1	0	1.87e-06	681	669	4.78	0	1009.68	0	0	25	657800	3	1094.2	3280.58	0	1.95	35.93	3294	3294	MS2	33/120	33	120	AH2.RAW
High	L	2	WNYDGSSTGQASGEDSEVILYPQAIFKDPFR	18035	Unambiguous	genomic_reference:SL2.31ch05 evidence_code:10F0H1E1IEG gene_region:60677361-60680424 functional_description:"Glutamine synthetase (AHRD V1 ***- A9PB10_POPTR); contains Interpro domain(s) IPR008146 Glutamine synthetase, catalytic region "	1	1	Solyc05g051250.1.1		CID	1	0	1	1	0	3.19e-16	604	576	4.69	0	1111.75	1	0	25	957900	3	1159.88	3477.63	0	1.09	68.95	6191	6191	MS2	33/120	33	120	EAH4.RAW
High	G	2	FNEFSSPALTESDFDAKPMVMLLGQYSTGK	58953	Unambiguous	genomic_reference:SL2.31ch11 evidence_code:10F0H1E1IEG gene_region:4963684-4968355 functional_description:"EH-domain-containing protein 1 (AHRD V1 **-* B6U193_MAIZE); contains Interpro domain(s) IPR001401 Dynamin, GTPase region "	1	1	Solyc11g012020.1.1		CID	1	0	1	1	0	3.15e-16	706	627	3.58	0	708.48	0	0	25	535800	3	1104.19	3310.57	0	0.44	68	6083	6083	MS2	33/116	33	116	EAC2.RAW
High	A	2	YGQDATNVGDEGGFAPNIQENKEGLELLK	12881	Unambiguous	genomic_reference:SL2.31ch09 evidence_code:10F1H1E1IEG gene_region:2371333-2375783 functional_description:"Enolase (AHRD V1 ***- C5J0G6_TOBAC); contains Interpro domain(s) IPR000941 Enolase "|genomic_reference:SL2.31ch10 evidence_code:10F1H1E1IEG gene_region:63994775-63999383 functional_description:"Enolase (AHRD V1 ***- C5J0G6_TOBAC); contains Interpro domain(s) IPR000941 Enolase "	2	2	Solyc09g009020.1.1;Solyc10g085550.1.1		CID	1	0	1	1	0	6.53e-08	668	725	5.01	0	769.15	1	10	25	2061000	3	1036.17	3106.5	0	0.76	46.45	4221	4221	MS2	33/112	33	112	AC1.RAW
High	A	2	MANDSVGPEVENLVAGLPEGGVVLLENVR	20218	Unambiguous	genomic_reference:SL2.31ch07 evidence_code:10F1H1E1IEG gene_region:65212571-65215004 functional_description:"Phosphoglycerate kinase (AHRD V1 ***- Q2VCK2_SOLTU); contains Interpro domain(s) IPR001576 Phosphoglycerate kinase "	1	1	Solyc07g066600.1.1		CID	1	0	1	1	0	3.4e-07	538	554	3.67	0	935.71	0	0	25	255500	3	993.181	2977.53	0	-0.09	78.27	6856	6856	MS2	33/112	33	112	AC1.RAW
High	D	2	YGQDATNVGDEGGFAPNIQENKEGLELLK	12881	Unambiguous	genomic_reference:SL2.31ch09 evidence_code:10F1H1E1IEG gene_region:2371333-2375783 functional_description:"Enolase (AHRD V1 ***- C5J0G6_TOBAC); contains Interpro domain(s) IPR000941 Enolase "|genomic_reference:SL2.31ch10 evidence_code:10F1H1E1IEG gene_region:63994775-63999383 functional_description:"Enolase (AHRD V1 ***- C5J0G6_TOBAC); contains Interpro domain(s) IPR000941 Enolase "	2	2	Solyc09g009020.1.1;Solyc10g085550.1.1		CID	1	0	1	1	0	1.5e-07	669	723	4.74	0	632.33	1	1	25	3991000	3	1036.17	3106.5	0	0.76	45.33	4099	4099	MS2	33/112	33	112	AH2.RAW
High	G	2	EMEEVEKQPEEVIFDQLHTTAFQYTPLGR	17755	Unambiguous	genomic_reference:SL2.31ch05 evidence_code:10F1H1E1IEG gene_region:5715526-5720889 functional_description:"Mitochondrial processing peptidase beta subunit (AHRD V1 ***- Q9AXQ2_CUCME); contains Interpro domain(s) IPR011237 Peptidase M16, core "	1	1	Solyc05g012480.1.1		CID	1	0	1	1	0	3.15e-16	731	697	5.51	0	1073.03	1	4	25	996800	3	1155.56	3464.67	0	0.68	63.25	5692	5692	MS2	33/112	33	112	EAC2.RAW
High	G	2	MANDSVGPEVENLVAGLPEGGVVLLENVR	20218	Unambiguous	genomic_reference:SL2.31ch07 evidence_code:10F1H1E1IEG gene_region:65212571-65215004 functional_description:"Phosphoglycerate kinase (AHRD V1 ***- Q2VCK2_SOLTU); contains Interpro domain(s) IPR001576 Phosphoglycerate kinase "	1	1	Solyc07g066600.1.1		CID	1	0	1	1	0	3.15e-16	523	552	3.6	0	1008.26	0	2	25	2600000	3	993.182	2977.53	0	0.71	79.25	7008	7008	MS2	33/112	33	112	EAC2.RAW
High	H	2	YGQDATNVGDEGGFAPNIQENKEGLELLK	12881	Unambiguous	genomic_reference:SL2.31ch09 evidence_code:10F1H1E1IEG gene_region:2371333-2375783 functional_description:"Enolase (AHRD V1 ***- C5J0G6_TOBAC); contains Interpro domain(s) IPR000941 Enolase "|genomic_reference:SL2.31ch10 evidence_code:10F1H1E1IEG gene_region:63994775-63999383 functional_description:"Enolase (AHRD V1 ***- C5J0G6_TOBAC); contains Interpro domain(s) IPR000941 Enolase "	2	2	Solyc09g009020.1.1;Solyc10g085550.1.1		CID	1	0	1	1	0	1.37e-05	659	709	4.49	0	908.43	1	1	25	1880000	3	1036.17	3106.5	0	-0.06	47.04	4362	4362	MS2	33/112	33	112	EAC3_150410225534.RAW
High	L	2	YGQDATNVGDEGGFAPNIQENKEGLELLK	12881	Unambiguous	genomic_reference:SL2.31ch09 evidence_code:10F1H1E1IEG gene_region:2371333-2375783 functional_description:"Enolase (AHRD V1 ***- C5J0G6_TOBAC); contains Interpro domain(s) IPR000941 Enolase "|genomic_reference:SL2.31ch10 evidence_code:10F1H1E1IEG gene_region:63994775-63999383 functional_description:"Enolase (AHRD V1 ***- C5J0G6_TOBAC); contains Interpro domain(s) IPR000941 Enolase "	2	2	Solyc09g009020.1.1;Solyc10g085550.1.1		CID	1	0	1	1	0	3.19e-16	672	723	4.62	0	786.58	1	4	25	637600	3	1036.17	3106.5	0	0.88	48.31	4440	4440	MS2	33/112	33	112	EAH4.RAW
High	B	2	LTDGTVFDSSYERNDPIEFELGSGQVIK	15353	Unambiguous	genomic_reference:SL2.31ch09 evidence_code:10F1H0E1IEG gene_region:45727592-45731649 functional_description:"FK506-binding protein 2 (EC 5.2.1.8)(Peptidyl-prolyl cis-trans isomerase)(PPIase)(Rotamase) (AHRD V1 **-* C8VE36_EMENI); contains Interpro domain(s) IPR001179 Peptidyl-prolyl cis-trans isomerase, FKBP-type "	1	1	Solyc09g057670.1.1		CID	1	0	1	1	0	2.99e-05	751	730	3.79	0	1232.9	1	3	25	988500	3	1039.51	3116.51	0	0.22	54.56	4929	4929	MS2	33/108	33	108	AC2.RAW
High	I	2	DKPLPSWSDSDVEEFIASDPLHGPTLR	17453	Unambiguous	genomic_reference:SL2.31ch06 evidence_code:10F1H1E1IEG gene_region:42013245-42016680 functional_description:"Unknown Protein (AHRD V1)"	1	1	Solyc06g073900.1.1		CID	1	0	1	1	0	5.78e-06	735	694	3.5	0	677.23	0	11	25	188300	3	1003.5	3008.48	0	4.35	62.91	5714	5714	MS2	33/104	33	104	EAC4_150411011441.RAW
High	J	2	VTDGIYEGIAIGGDVFPGSTLSDHVLR	16766	Unambiguous	genomic_reference:SL2.31ch01 evidence_code:10F1H1E1IEG gene_region:61771388-61776275 functional_description:"ATP citrate lyase a-subunit (AHRD V1 **** Q93YH4_LUPAL); contains Interpro domain(s) IPR016141 Citrate synthase-like, core "	1	1	Solyc01g059880.1.1		CID	1	0	1	1	0	0.000159	595	580	5.01	0	894.36	0	4	25	793900	3	930.143	2788.41	0	-0.31	61.64	5711	5711	MS2	33/104	33	104	EAH1.RAW
High	A	2	WFDTNYHFIVPELGPDVNFSYASHK	17791	Unambiguous	genomic_reference:SL2.31ch10 evidence_code:10F1H1E1IEG gene_region:61889662-61892937 functional_description:"5-methyltetrahydropteroyltriglutamate--homocysteine methyltransferase (AHRD V1 ***- B6UF55_MAIZE); contains Interpro domain(s) IPR006276 5-methyltetrahydropteroyltriglutamate--homocysteine S-methyltransferase "	1	1	Solyc10g081510.1.1		CID	1	0	1	1	0	2.1e-07	626	584	4.5	0	1089.14	0	14	25	471400	3	995.139	2983.4	0	-0.96	65.38	5800	5800	MS2	32/96	32	96	AC1.RAW
High	C	2	TNDLAGDGTTTSVVLAQGLIAEGVK	15814	Unambiguous	genomic_reference:SL2.31ch01 evidence_code:10F1H1E1IEG gene_region:33327275-33331326 functional_description:"chaperonin (AHRD V1 ***- B4VMY1_9CYAN); contains Interpro domain(s) IPR001844 Chaperonin Cpn60 "	1	1	Solyc01g028810.1.1		CID	1	0	1	1	0	2.79e-08	444	497	4.71	0	957.88	0	3	23	2317000	3	810.763	2430.27	0	0.79	55.97	5020	5020	MS2	32/96	32	96	AC3.RAW
High	D	2	ALLAIPTTIADNAGLDSAELIAQLR	20912	Unambiguous	genomic_reference:SL2.31ch11 evidence_code:10F1H1E1IEG gene_region:50651405-50656732 functional_description:"T-complex protein 1 subunit beta (AHRD V1 ***- B6T8X5_MAIZE); contains Interpro domain(s) IPR012716 T-complex protein 1, beta subunit "	1	1	Solyc11g069000.1.1		CID	1	0	1	1	0	6.43e-07	184	185	4.23	0	904.83	0	13	25	534200	3	850.81	2550.42	0	1.11	82.11	7142	7142	MS2	32/96	32	96	AH2.RAW
High	E	2	ALLAIPTTIADNAGLDSAELIAQLR	20912	Unambiguous	genomic_reference:SL2.31ch11 evidence_code:10F1H1E1IEG gene_region:50651405-50656732 functional_description:"T-complex protein 1 subunit beta (AHRD V1 ***- B6T8X5_MAIZE); contains Interpro domain(s) IPR012716 T-complex protein 1, beta subunit "	1	1	Solyc11g069000.1.1		CID	1	0	1	1	0	0.000736	172	172	3.95	0	716.51	0	8	25	265100	3	850.811	2550.42	0	1.98	87.85	7688	7688	MS2	32/96	32	96	AH3.RAW
High	F	2	ALLAIPTTIADNAGLDSAELIAQLR	20912	Unambiguous	genomic_reference:SL2.31ch11 evidence_code:10F1H1E1IEG gene_region:50651405-50656732 functional_description:"T-complex protein 1 subunit beta (AHRD V1 ***- B6T8X5_MAIZE); contains Interpro domain(s) IPR012716 T-complex protein 1, beta subunit "	1	1	Solyc11g069000.1.1		CID	1	0	1	1	0	6.09e-08	218	222	4.09	0	1045.78	0	46	25	222400	3	850.807	2550.41	0	-3.19	85.36	7562	7562	MS2	32/96	32	96	AH4.RAW
High	G	2	ALLAIPTTIADNAGLDSAELIAQLR	20912	Unambiguous	genomic_reference:SL2.31ch11 evidence_code:10F1H1E1IEG gene_region:50651405-50656732 functional_description:"T-complex protein 1 subunit beta (AHRD V1 ***- B6T8X5_MAIZE); contains Interpro domain(s) IPR012716 T-complex protein 1, beta subunit "	1	1	Solyc11g069000.1.1		CID	1	0	1	1	0	3.15e-16	184	185	4.21	0	996.73	0	30	25	537900	3	850.81	2550.42	0	1.04	81.96	7229	7229	MS2	32/96	32	96	EAC2.RAW
High	I	2	AEATDVANAVLDGTDAILLGAETLR	21397	Unambiguous	genomic_reference:SL2.31ch09 evidence_code:10F1H1E1IEG gene_region:2260322-2267191 functional_description:"Pyruvate kinase (AHRD V1 ***- A9P7U5_POPTR); contains Interpro domain(s) IPR001697 Pyruvate kinase "|genomic_reference:SL2.31ch10 evidence_code:10F1H1E1IEG gene_region:62809938-62815473 functional_description:"Pyruvate kinase (AHRD V1 ***- Q94KE3_ARATH); contains Interpro domain(s) IPR001697…	2	2	Solyc09g008840.1.1;Solyc10g083720.1.1		CID	1	0	1	1	0	1.13e-06	556	519	3.66	0	1184.79	0	10	25	185200	3	833.77	2499.29	0	0.45	85.09	7658	7658	MS2	32/96	32	96	EAC4_150411011441.RAW
High	A	2	SDVSNVVHADEFEYKDPVDGSVSK	9499	Unambiguous	genomic_reference:SL2.31ch04 evidence_code:10F0H1E1IEG gene_region:31641900-31656873 functional_description:"Phosphoglucomutase (AHRD V1 **** Q9AUQ4_ORYSA); contains Interpro domain(s) IPR016055 Alpha-D-phosphohexomutase, alpha/beta/alpha I, II and III "	1	1	Solyc04g045340.1.1		CID	1	0	1	1	0	2.92e-07	502	542	3.77	0	1319.04	1	8	25	1027000	3	875.077	2623.22	0	0.01	34.39	3184	3184	MS2	32/92	32	92	AC1.RAW
High	C	2	LSQPNPDDLGHVDSVSVEEIGGVR	33854	Unambiguous	genomic_reference:SL2.31ch01 evidence_code:10F1H1E1IEG gene_region:74679334-74687600 functional_description:"T-complex protein theta subunit (AHRD V1 ***- A8IF08_CHLRE); contains Interpro domain(s) IPR012721 T-complex protein 1, theta subunit "	1	1	Solyc01g088080.1.1		CID	1	0	1	1	0	2.75e-08	687	714	3.49	0	621.35	0	6	25	588100	3	840.417	2519.24	0	0.06	41.7	3835	3835	MS2	32/92	32	92	AC3.RAW
High	F	2	GLEIDPNNEGLKSGLADAQSAQAR	113714	Unambiguous	genomic_reference:SL2.31ch08 evidence_code:10F0H1E1IEG gene_region:59970823-59975559 functional_description:"Stress-induced protein sti1-like protein (AHRD V1 **-- Q9STH1_ARATH); contains Interpro domain(s) IPR011990 Tetratricopeptide-like helical "	1	1	Solyc08g079170.1.1		CID	1	0	1	1	0	3.88e-09	674	657	4.33	0	1264.61	1	18	25	417000	3	818.746	2454.22	0	0.01	37.63	3557	3557	MS2	32/92	32	92	AH4.RAW
High	F	2	VETGVIKPGMVVTFGPTGLTTEVK	34881	Unambiguous	genomic_reference:SL2.31ch06 evidence_code:10F0H1E1IEG gene_region:36374-37800 functional_description:"Elongation factor 1-alpha (AHRD V1 ***- Q8H9C0_SOLTU); contains Interpro domain(s) IPR004539 Translation elongation factor EF1A, eukaryotic and archaeal IPR000795 Protein synthesis factor, GTP-binding "	3	1	Solyc06g005060.1.1		CID	1	0	1	1	0	2.2e-13	281	251	4.36	0	1286.36	0	3	25	671700	3	820.786	2460.34	0	0.17	53.53	4931	4931	MS2	32/92	32	92	AH4.RAW
High	F	2	ILASVGAEADDDRIQLLLSQVEGK	99992	Unambiguous	genomic_reference:SL2.31ch06 evidence_code:10F0H1E1IEG gene_region:42459548-42462032 functional_description:"60s acidic ribosomal protein-like protein (AHRD V1 ***- Q3HVP0_SOLTU); contains Interpro domain(s) IPR001813 Ribosomal protein 60S "	1	1	Solyc06g074430.1.1		CID	1	0	1	1	0	4.54e-14	386	340	4.88	0	1380.94	1	10	25	224000	3	847.458	2540.36	0	0.92	65.37	5917	5917	MS2	32/92	32	92	AH4.RAW
High	G	2	VETGVIKPGmVVTFGPTGLTTEVK	34881	Unambiguous	genomic_reference:SL2.31ch06 evidence_code:10F0H1E1IEG gene_region:36374-37800 functional_description:"Elongation factor 1-alpha (AHRD V1 ***- Q8H9C0_SOLTU); contains Interpro domain(s) IPR004539 Translation elongation factor EF1A, eukaryotic and archaeal IPR000795 Protein synthesis factor, GTP-binding "	3	1	Solyc06g005060.1.1	M10(Oxidation)	CID	1	0	1	1	0	3.15e-16	331	296	3.82	0	1421.02	0	10	22	1372000	3	826.118	2476.34	0	0.94	43.4	4039	4039	MS2	32/92	32	92	EAC2.RAW
High	H	2	ELDYLVGAVSNPQKPFAAIVGGSK	15602	Unambiguous	genomic_reference:SL2.31ch07 evidence_code:10F1H1E1IEG gene_region:65212571-65215004 functional_description:"Phosphoglycerate kinase (AHRD V1 ***- Q2VCK2_SOLTU); contains Interpro domain(s) IPR001576 Phosphoglycerate kinase "	1	1	Solyc07g066600.1.1		CID	1	0	1	1	0	1.03e-06	388	355	4.4	0	954.88	0	15	25	1550000	3	820.776	2460.31	0	0.31	57.05	5214	5214	MS2	32/92	32	92	EAC3_150410225534.RAW
High	J	2	SDVSNVVHADEFEYKDPVDGSVSK	9499	Unambiguous	genomic_reference:SL2.31ch04 evidence_code:10F0H1E1IEG gene_region:31641900-31656873 functional_description:"Phosphoglucomutase (AHRD V1 **** Q9AUQ4_ORYSA); contains Interpro domain(s) IPR016055 Alpha-D-phosphohexomutase, alpha/beta/alpha I, II and III "	1	1	Solyc04g045340.1.1		CID	1	0	1	1	0	3.33e-05	507	561	5.54	0	1300.28	1	8	25	4560000	3	875.078	2623.22	0	0.99	36.08	3484	3484	MS2	32/92	32	92	EAH1.RAW
High	J	2	DAGVLLSYDPNVRLPLWPSPEAAR	17821	Unambiguous	genomic_reference:SL2.31ch11 evidence_code:10F0H1E0IEG gene_region:34310265-34312777 functional_description:"5-dehydro-2-deoxygluconokinase (AHRD V1 **-- IOLC_GEOTN); contains Interpro domain(s) IPR011611 Carbohydrate/purine kinase "	1	1	Solyc11g042850.1.1		CID	1	0	1	1	0	0.000494	493	474	4.27	0	1168.92	1	23	25	1970000	3	879.466	2636.38	0	0.57	65.98	6077	6077	MS2	32/92	32	92	EAH1.RAW
High	K	2	ELDYLVGAVSNPQKPFAAIVGGSK	15602	Unambiguous	genomic_reference:SL2.31ch07 evidence_code:10F1H1E1IEG gene_region:65212571-65215004 functional_description:"Phosphoglycerate kinase (AHRD V1 ***- Q2VCK2_SOLTU); contains Interpro domain(s) IPR001576 Phosphoglycerate kinase "	1	1	Solyc07g066600.1.1		CID	1	0	1	1	0	4.13e-07	370	329	4.28	0	1098.36	0	26	25	861400	3	820.777	2460.32	0	1.5	56.01	5101	5101	MS2	32/92	32	92	EAH2.RAW
High	A	2	AILGESNEFVGDKVAYALSQGLK	16917	Unambiguous	genomic_reference:SL2.31ch04 evidence_code:10F0H1E1IEG gene_region:3944492-3948735 functional_description:"Triosephosphate isomerase (AHRD V1 **** Q38JI4_SOLTU); contains Interpro domain(s) IPR000652 Triosephosphate isomerase "	1	1	Solyc04g011510.1.1		CID	1	0	1	1	0	7.72e-06	459	440	4.42	0	1276.75	1	85	25	622900	3	803.761	2409.27	0	0.87	61.47	5477	5477	MS2	32/88	32	88	AC1.RAW
High	A	2	KLLDELGIPAEDVPVDQFTPLGR	16968	Unambiguous	genomic_reference:SL2.31ch05 evidence_code:10F1H1E1IEG gene_region:64416664-64419540 functional_description:"Isopentenyl-diphosphate delta-isomerase (AHRD V1 **** Q84RZ8_9GENT); contains Interpro domain(s) IPR011876 Isopentenyl-diphosphate delta-isomerase, type 1 "	1	1	Solyc05g055760.1.1		CID	1	0	1	1	0	2.76e-05	370	369	3.58	0	1158.36	1	0	25	739600	3	841.453	2522.35	0	-1.78	61.69	5495	5495	MS2	32/88	32	88	AC1.RAW
High	A	2	ILDWADVINAHIISGPGIVDGLK	19692	Unambiguous	genomic_reference:SL2.31ch11 evidence_code:10F0H1E1IEG gene_region:50518935-50523650 functional_description:"Orotidine 5&apos-phosphate decarboxylase (Orotate phosphoribosyltransferase) (AHRD V1 **** C4QAV6_SCHMA); contains Interpro domain(s) IPR001754 Orotidine 5'-phosphate decarboxylase, core "	1	1	Solyc11g068830.1.1		CID	1	0	1	1	0	1.36e-08	244	255	3.93	0	770.11	0	26	25	477500	3	806.113	2416.32	0	0.4	73.9	6497	6497	MS2	32/88	32	88	AC1.RAW
High	B	2	LIVDETVNDDNSVVALHPATmEK	31910	Unambiguous	genomic_reference:SL2.31ch11 evidence_code:10F1H1E1IEG gene_region:51411308-51416865 functional_description:"26S protease regulatory subunit 6B homolog (AHRD V1 *--- PRS6B_ARATH); contains Interpro domain(s) IPR005938 ATPase, AAA-type, CDC48 "	1	1	Solyc11g069720.1.1	M21(Oxidation)	CID	1	0	1	1	0	1.73e-07	684	709	4.54	0	1046.59	0	6	25	570600	3	842.751	2526.24	0	-0.31	34.85	3256	3256	MS2	32/88	32	88	AC2.RAW
High	B	2	AILGESNEFVGDKVAYALSQGLK	16917	Unambiguous	genomic_reference:SL2.31ch04 evidence_code:10F0H1E1IEG gene_region:3944492-3948735 functional_description:"Triosephosphate isomerase (AHRD V1 **** Q38JI4_SOLTU); contains Interpro domain(s) IPR000652 Triosephosphate isomerase "	1	1	Solyc04g011510.1.1		CID	1	0	1	1	0	3.99e-06	442	424	4.31	0	1260.85	1	19	25	546000	3	803.762	2409.27	0	2.46	60.91	5455	5455	MS2	32/88	32	88	AC2.RAW
High	C	2	TmPAAVPAVVFLSGGQSEEEATR	13491	Unambiguous	genomic_reference:SL2.31ch10 evidence_code:10F1H1E1IEG gene_region:62683898-62686621 functional_description:"Fructose-bisphosphate aldolase (AHRD V1 ***- Q308A5_SOLTU); contains Interpro domain(s) IPR000741 Fructose-bisphosphate aldolase, class-I "	1	1	Solyc10g083570.1.1	M2(Oxidation)	CID	1	0	1	1	0	3.37e-08	679	716	3.44	0	898.81	0	0	25	1662000	3	788.39	2363.16	0	0.72	47.68	4335	4335	MS2	32/88	32	88	AC3.RAW
High	C	2	KLLDELGIPAEDVPVDQFTPLGR	16968	Unambiguous	genomic_reference:SL2.31ch05 evidence_code:10F1H1E1IEG gene_region:64416664-64419540 functional_description:"Isopentenyl-diphosphate delta-isomerase (AHRD V1 **** Q84RZ8_9GENT); contains Interpro domain(s) IPR011876 Isopentenyl-diphosphate delta-isomerase, type 1 "	1	1	Solyc05g055760.1.1		CID	1	0	1	1	0	1.1e-06	377	350	3.36	0	1175.74	1	3	25	518300	3	841.455	2522.35	0	-0.18	61.05	5436	5436	MS2	32/88	32	88	AC3.RAW
High	F	2	ILDWADVINAHIISGPGIVDGLK	19692	Unambiguous	genomic_reference:SL2.31ch11 evidence_code:10F0H1E1IEG gene_region:50518935-50523650 functional_description:"Orotidine 5&apos-phosphate decarboxylase (Orotate phosphoribosyltransferase) (AHRD V1 **** C4QAV6_SCHMA); contains Interpro domain(s) IPR001754 Orotidine 5'-phosphate decarboxylase, core "	1	1	Solyc11g068830.1.1		CID	1	0	1	1	0	2.22e-09	267	269	3.51	0	712.13	0	11	25	374900	3	806.112	2416.32	0	-1.12	76.97	6868	6868	MS2	32/88	32	88	AH4.RAW
High	I	2	AILGESNEFVGDKVAYALSQGLK	16917	Unambiguous	genomic_reference:SL2.31ch04 evidence_code:10F0H1E1IEG gene_region:3944492-3948735 functional_description:"Triosephosphate isomerase (AHRD V1 **** Q38JI4_SOLTU); contains Interpro domain(s) IPR000652 Triosephosphate isomerase "	1	1	Solyc04g011510.1.1		CID	1	0	1	1	0	1.36e-05	452	425	3.87	0	1265.99	1	39	25	406500	3	803.761	2409.27	0	0.49	60.95	5547	5547	MS2	32/88	32	88	EAC4_150411011441.RAW
High	K	2	AILGESNEFVGDKVAYALSQGLK	16917	Unambiguous	genomic_reference:SL2.31ch04 evidence_code:10F0H1E1IEG gene_region:3944492-3948735 functional_description:"Triosephosphate isomerase (AHRD V1 **** Q38JI4_SOLTU); contains Interpro domain(s) IPR000652 Triosephosphate isomerase "	1	1	Solyc04g011510.1.1		CID	1	0	1	1	0	2.22e-06	446	432	4.62	0	1180.33	1	42	20	2035000	3	803.761	2409.27	0	0.94	60.96	5518	5518	MS2	32/88	32	88	EAH2.RAW
High	K	2	KLLDELGIPAEDVPVDQFTPLGR	16968	Unambiguous	genomic_reference:SL2.31ch05 evidence_code:10F1H1E1IEG gene_region:64416664-64419540 functional_description:"Isopentenyl-diphosphate delta-isomerase (AHRD V1 **** Q84RZ8_9GENT); contains Interpro domain(s) IPR011876 Isopentenyl-diphosphate delta-isomerase, type 1 "	1	1	Solyc05g055760.1.1		CID	1	0	1	1	0	3.8e-07	361	338	4.02	0	1233.91	1	12	25	985200	3	841.456	2522.35	0	0.76	61.92	5600	5600	MS2	32/88	32	88	EAH2.RAW
High	K	2	FQAGSPYIYPLYGLGELPQAFAR	19753	Unambiguous	genomic_reference:SL2.31ch01 evidence_code:10F1H1E1IEG gene_region:85610405-85615953 functional_description:"Rab-GDP dissociation inhibitor (AHRD V1 **** A5CKE3_SOLLC); contains Interpro domain(s) IPR000806 Rab GDI protein "	1	1	Solyc01g105810.1.1		CID	1	0	1	1	0	6.61e-07	604	564	4.05	0	705.33	0	8	25	965600	3	853.442	2558.31	0	1.04	74.48	6649	6649	MS2	32/88	32	88	EAH2.RAW
High	L	2	ILDWADVINAHIISGPGIVDGLK	19692	Unambiguous	genomic_reference:SL2.31ch11 evidence_code:10F0H1E1IEG gene_region:50518935-50523650 functional_description:"Orotidine 5&apos-phosphate decarboxylase (Orotate phosphoribosyltransferase) (AHRD V1 **** C4QAV6_SCHMA); contains Interpro domain(s) IPR001754 Orotidine 5'-phosphate decarboxylase, core "	1	1	Solyc11g068830.1.1		CID	1	0	1	1	0	3.19e-16	240	253	3.71	0	754	0	17	25	333900	3	806.114	2416.33	0	1.15	77.44	6898	6898	MS2	32/88	32	88	EAH4.RAW
High	C	2	VGDESYESFSAEKEAILSSLAR	15616	Unambiguous	genomic_reference:SL2.31ch06 evidence_code:10F0H1E1IEG gene_region:36234655-36238685 functional_description:"Alanine aminotransferase (AHRD V1 **** Q6VEJ5_CAPAN); contains Interpro domain(s) IPR004839 Aminotransferase, class I and II "	1	1	Solyc06g063090.1.1		CID	1	0	1	1	0	6.53e-08	644	684	4.21	0	1680.54	1	18	16	1204000	3	796.724	2388.16	0	0.49	55.3	4965	4965	MS2	32/84	32	84	AC3.RAW
High	D	2	AAGASWIQLDEPTLVLDLESHK	17962	Unambiguous	genomic_reference:SL2.31ch10 evidence_code:10F1H1E1IEG gene_region:61889662-61892937 functional_description:"5-methyltetrahydropteroyltriglutamate--homocysteine methyltransferase (AHRD V1 ***- B6UF55_MAIZE); contains Interpro domain(s) IPR006276 5-methyltetrahydropteroyltriglutamate--homocysteine S-methyltransferase "	1	1	Solyc10g081510.1.1		CID	1	0	1	1	0	1.52e-07	581	582	4.27	0	947.11	0	8	24	1012000	3	798.417	2393.24	0	0.36	64.56	5702	5702	MS2	32/84	32	84	AH2.RAW
High	F	2	LASYGVENPLYAVIQLAQTTMR	65493	Unambiguous	genomic_reference:SL2.31ch03 evidence_code:10F0H1E1IEG gene_region:45474100-45480611 functional_description:"Band 7 stomatin family protein (AHRD V1 **-- C1MUP6_MICPS); contains Interpro domain(s) IPR001972 Stomatin "|genomic_reference:SL2.31ch06 evidence_code:10F0H1E0IEG gene_region:41390745-41392737 functional_description:"Band 7 stomatin family protein (AHRD V1 **-- C1MUP6_MICPS); contains Int…	2	1	Solyc03g080050.1.1		CID	1	0	1	1	0	1.34e-12	437	450	4.77	0	1063.06	0	5	25	159500	3	813.431	2438.28	0	0.89	96.91	8569	8569	MS2	32/84	32	84	AH4.RAW
High	G	2	LIGEAADLMQEVAVETFGAMAK	21469	Unambiguous	genomic_reference:SL2.31ch04 evidence_code:10F1H1E1IEG gene_region:49587422-49595735 functional_description:"26S proteasome non-ATPase regulatory subunit 12 (AHRD V1 ***- B5X386_SALSA); contains Interpro domain(s) IPR000717 Proteasome component region PCI "	1	1	Solyc04g051370.1.1		CID	1	0	1	1	0	3.15e-16	655	653	3.98	0	1805.73	0	17	25	268400	3	765.386	2294.14	0	1.44	88.05	7726	7726	MS2	32/84	32	84	EAC2.RAW
High	J	2	LIGEAADLMQEVAVETFGAMAK	21469	Unambiguous	genomic_reference:SL2.31ch04 evidence_code:10F1H1E1IEG gene_region:49587422-49595735 functional_description:"26S proteasome non-ATPase regulatory subunit 12 (AHRD V1 ***- B5X386_SALSA); contains Interpro domain(s) IPR000717 Proteasome component region PCI "	1	1	Solyc04g051370.1.1		CID	1	0	1	1	0	3.31e-05	670	674	4.15	0	1950.43	0	20	25	177800	3	765.385	2294.14	0	0.32	89.25	8006	8006	MS2	32/84	32	84	EAH1.RAW
High	K	2	LALYDIAGTPGVAADVSHINTR	13484	Unambiguous	genomic_reference:SL2.31ch12 evidence_code:10F1H1E1IEG gene_region:5028935-5033187 functional_description:"Malate dehydrogenase (AHRD V1 ***- Q8L5C9_SOLTU); contains Interpro domain(s) IPR010097 Malate dehydrogenase, NAD-dependent, eukaryotes and gamma proteobacteria "	1	1	Solyc12g014180.1.1		CID	1	0	1	1	0	6.97e-08	463	504	3.77	0	1006.25	0	9	16	2043000	3	752.066	2254.18	0	0.38	48.44	4458	4458	MS2	32/84	32	84	EAH2.RAW
High	A	2	TVDTTGAGDAFVGSLLVSIAK	18841	Unambiguous	genomic_reference:SL2.31ch11 evidence_code:10F0H1E0IEG gene_region:34310265-34312777 functional_description:"5-dehydro-2-deoxygluconokinase (AHRD V1 **-- IOLC_GEOTN); contains Interpro domain(s) IPR011611 Carbohydrate/purine kinase "	1	1	Solyc11g042850.1.1		CID	1	0	1	1	0	1.83e-09	438	421	4.83	0	1633.58	0	23	25	531100	3	674.697	2022.08	0	0.15	70.02	6179	6179	MS2	32/80	32	80	AC1.RAW
High	B	2	MLVYQDLLTGDELLSDSFPYK	19485	Unambiguous	genomic_reference:SL2.31ch01 evidence_code:10F1H1E1IEG gene_region:81675915-81677545 functional_description:"Translationally-controlled tumor protein homolog (AHRD V1 ***- B5XDL0_SALSA); contains Interpro domain(s) IPR001983 Translationally controlled tumour-associated TCTP "|genomic_reference:SL2.31ch01 evidence_code:10F1H1E1IEG gene_region:81681494-81683364 functional_description:"Translational…	2	2	Solyc01g099770.1.1;Solyc01g099780.1.1		CID	1	0	1	1	0	1.28e-05	738	706	4.67	0	1458.33	0	4	25	174800	3	816.406	2447.2	0	-0.76	76.12	6717	6717	MS2	32/80	32	80	AC2.RAW
High	C	2	LTGMAFRVPTVDVSVVDLTAR	15163	Unambiguous	genomic_reference:SL2.31ch05 evidence_code:10F0H1E0IEG gene_region:648534-651184 functional_description:"Glyceraldehyde-3-phosphate dehydrogenase (AHRD V1 **** Q9XG67_TOBAC); contains Interpro domain(s) IPR000173 Glyceraldehyde 3-phosphate dehydrogenase "	1	1	Solyc05g005820.1.1		CID	1	0	1	1	0	2.92e-07	339	313	4.31	0	1815.34	1	13	25	883300	3	749.744	2247.22	0	0.12	59.61	5319	5319	MS2	32/80	32	80	AC3.RAW
High	D	2	IPSAVGYQPTLATDLGGLQER	13265	Unambiguous	genomic_reference:SL2.31ch02 evidence_code:10F0H1E0IEG gene_region:47123903-47126760 functional_description:"ATP synthase subunit beta (AHRD V1 ***- Q9ZR78_NICSY); contains Interpro domain(s) IPR005722 ATPase, F1 complex, beta subunit "|genomic_reference:SL2.31ch04 evidence_code:10F1H1E1IEG gene_region:1237570-1241219 functional_description:"ATP synthase subunit beta (AHRD V1 ***- O82722_NICSY); …	3	3	Solyc02g091130.1.1;Solyc04g007550.1.1;Solyc05g008460.1.1		CID	1	0	1	1	0	1.87e-08	504	515	3.99	0	1777.67	0	5	17	4087000	3	729.387	2186.15	0	0.91	46.66	4213	4213	MS2	32/80	32	80	AH2.RAW
High	E	2	TVDTTGAGDAFVGSLLVSIAK	18841	Unambiguous	genomic_reference:SL2.31ch11 evidence_code:10F0H1E0IEG gene_region:34310265-34312777 functional_description:"5-dehydro-2-deoxygluconokinase (AHRD V1 **-- IOLC_GEOTN); contains Interpro domain(s) IPR011611 Carbohydrate/purine kinase "	1	1	Solyc11g042850.1.1		CID	1	0	1	1	0	0.000118	441	420	4.49	0	2006.45	0	18	25	101900	3	674.697	2022.08	0	0.97	75.46	6654	6654	MS2	32/80	32	80	AH3.RAW
High	F	2	VPFTSGLGLDTIGVETDKAGR	56980	Unambiguous	genomic_reference:SL2.31ch12 evidence_code:10F1H1E1IEG gene_region:64711418-64716419 functional_description:"Dihydrolipoyl dehydrogenase (AHRD V1 ***- Q9FEN7_SOLTU); contains Interpro domain(s) IPR006258 Dihydrolipoamide dehydrogenase "	1	1	Solyc12g099100.1.1		CID	1	0	1	1	0	6.65e-09	544	582	4.73	0	1235.78	1	34	25	748100	3	711.712	2133.12	0	1.83	48.96	4543	4543	MS2	32/80	32	80	AH4.RAW
High	F	2	GIIEPISDTIINLVNADFSAK	125128	Unambiguous	genomic_reference:SL2.31ch03 evidence_code:10F1H1E1IEG gene_region:64594194-64596833 functional_description:"Phosphoglycerate dehydrogenase (AHRD V1 **** D2D316_GOSHI); contains Interpro domain(s) IPR015508 D-3-phosphogylcerate Dehydrogenase "	1	1	Solyc03g123830.1.1		CID	1	0	1	1	0	6.87e-12	379	358	4.39	0	1243.24	0	5	25	99910	3	744.071	2230.2	0	0.21	91.76	8109	8109	MS2	32/80	32	80	AH4.RAW
High	G	2	LLFHFPPNSDTDLDSYVIGDK	60145	Unambiguous	genomic_reference:SL2.31ch11 evidence_code:10F1H1E1IEG gene_region:1510020-1515652 functional_description:"Diphosphomevalonate decarboxylase-like protein (AHRD V1 ***- Q8LAR8_ARATH); contains Interpro domain(s) IPR005935 Diphosphomevalonate decarboxylase "	1	1	Solyc11g007020.1.1		CID	1	0	1	1	0	3.15e-16	663	678	5.08	0	1860.15	0	31	25	744500	3	798.392	2393.16	0	-1.82	62.9	5663	5663	MS2	32/80	32	80	EAC2.RAW
High	K	2	AVLDPADPLGFLQAAFEFVGR	22215	Unambiguous	genomic_reference:SL2.31ch03 evidence_code:10F1H1E1IEG gene_region:46784322-46788425 functional_description:"Nuclear movement protein nudc (AHRD V1 *-*- Q17KI6_AEDAE); contains Interpro domain(s) IPR017447 CS "	1	1	Solyc03g083390.1.1		CID	1	0	1	1	0	4.71e-07	539	527	4.34	0	1351.41	0	13	25	102600	3	745.06	2233.17	0	0.55	98.24	8686	8686	MS2	32/80	32	80	EAH2.RAW
High	L	2	ALVVINPGNPTGQVLGEANQR	11666	Unambiguous	genomic_reference:SL2.31ch06 evidence_code:10F0H1E1IEG gene_region:36234655-36238685 functional_description:"Alanine aminotransferase (AHRD V1 **** Q6VEJ5_CAPAN); contains Interpro domain(s) IPR004839 Aminotransferase, class I and II "	1	1	Solyc06g063090.1.1		CID	1	0	1	1	0	3.19e-16	410	391	3.69	0	1511.06	0	57	25	107800	3	716.391	2147.16	0	1.07	44.13	4085	4085	MS2	32/80	32	80	EAH4.RAW
High	A	2	LYmEARPmEEGLAEAIDEGR	9460	Unambiguous	genomic_reference:SL2.31ch08 evidence_code:10F0H1E1IEG gene_region:49546658-49549476 functional_description:"Elongation factor EF-2 (AHRD V1 **** Q9SGT4_ARATH); contains Interpro domain(s) IPR000795 Protein synthesis factor, GTP-binding "	2	1	Solyc08g062920.1.1	M3(Oxidation); M8(Oxidation)	CID	1	0	1	1	0	2.13e-08	394	407	4.28	0	1962.16	0	24	25	1400000	3	771.356	2312.05	0	-0.46	34.27	3174	3174	MS2	32/76	32	76	AC1.RAW
High	A	2	VSQmIEDHEPFEGEALLDAK	10975	Unambiguous	genomic_reference:SL2.31ch11 evidence_code:10F0H1E1IEG gene_region:16767601-16769691 functional_description:"Elongation factor 1-gamma (AHRD V1 ***- B7SDI2_ORYSJ); contains Interpro domain(s) IPR001662 Translation elongation factor EF1B, gamma chain, conserved "	1	1	Solyc11g028100.1.1	M4(Oxidation)	CID	1	0	1	1	0	1.13e-08	506	521	4.96	0	1854.86	0	19	25	548700	3	758.692	2274.06	0	1.17	39.5	3631	3631	MS2	32/76	32	76	AC1.RAW
High	A	2	VSQMIEDHEPFEGQALLDAK	10284	Unambiguous	genomic_reference:SL2.31ch06 evidence_code:10F1H1E1IEG gene_region:6258168-6260708 functional_description:"Elongation factor 1-gamma (AHRD V1 ***- B7SDI2_ORYSJ); contains Interpro domain(s) IPR001662 Translation elongation factor EF1B, gamma chain, conserved "	1	1	Solyc06g011280.1.1		CID	1	0	1	1	0	1.27e-06	694	672	4.1	0	1672.85	0	13	20	1767000	3	753.033	2257.09	0	2.2	42.1	3853	3853	MS2	32/76	32	76	AC1.RAW
High	A	2	EAPAFVEQATEQQILVTGIK	14533	Unambiguous	genomic_reference:SL2.31ch04 evidence_code:10F1H1E1IEG gene_region:1237570-1241219 functional_description:"ATP synthase subunit beta (AHRD V1 ***- O82722_NICSY); contains Interpro domain(s) IPR005722 ATPase, F1 complex, beta subunit "|genomic_reference:SL2.31ch05 evidence_code:10F1H1E1IEG gene_region:2806055-2809657 functional_description:"ATP synthase subunit beta (AHRD V1 ***- O82722_NICSY); co…	2	2	Solyc04g007550.1.1;Solyc05g008460.1.1		CID	1	0	1	1	0	1.66e-07	467	421	4.26	0	1739.43	0	10	14	4147000	3	724.723	2172.16	0	0.47	52.37	4718	4718	MS2	32/76	32	76	AC1.RAW
High	A	2	AGELTAAELDSLMVVVANPR	17905	Unambiguous	genomic_reference:SL2.31ch06 evidence_code:10F1H1E1IEG gene_region:41600371-41601864 functional_description:"40S ribosomal protein S18 (AHRD V1 ***- B4G286_MAIZE); contains Interpro domain(s) IPR001892 Ribosomal protein S13 "	2	1	Solyc06g073370.1.1		CID	1	0	1	1	0	9.62e-06	537	568	3.87	0	1071.73	0	7	25	614800	3	686.03	2056.07	0	0	65.5	5809	5809	MS2	32/76	32	76	AC1.RAW
High	B	2	FIVEAANHPTDPDADEILSK	9984	Unambiguous	genomic_reference:SL2.31ch05 evidence_code:10F0H1E1IEG gene_region:61565704-61570805 functional_description:"Glutamate dehydrogenase (AHRD V1 **** Q94IA5_BRANA); contains Interpro domain(s) IPR014362 Glutamate dehydrogenase "	1	1	Solyc05g052100.1.1		CID	1	0	1	1	0	2.92e-08	597	608	3.08	0	666.62	0	8	15	2873000	3	728.027	2182.07	0	0.51	35.8	3339	3339	MS2	32/76	32	76	AC2.RAW
High	B	2	EAPAFVEQATEQQILVTGIK	14533	Unambiguous	genomic_reference:SL2.31ch04 evidence_code:10F1H1E1IEG gene_region:1237570-1241219 functional_description:"ATP synthase subunit beta (AHRD V1 ***- O82722_NICSY); contains Interpro domain(s) IPR005722 ATPase, F1 complex, beta subunit "|genomic_reference:SL2.31ch05 evidence_code:10F1H1E1IEG gene_region:2806055-2809657 functional_description:"ATP synthase subunit beta (AHRD V1 ***- O82722_NICSY); co…	2	2	Solyc04g007550.1.1;Solyc05g008460.1.1		CID	1	0	1	1	0	1.88e-07	474	455	4.92	0	1742.63	0	10	24	1688000	3	724.723	2172.15	0	-0.29	51.4	4665	4665	MS2	32/76	32	76	AC2.RAW
High	C	2	APmIDNPDFKDDPDLYVFPK	13140	Unambiguous	genomic_reference:SL2.31ch01 evidence_code:10F0H1E1IEG gene_region:82189196-82192436 functional_description:"Calreticulin 2 calcium-binding protein (AHRD V1 **** A8HMC0_CHLRE); contains Interpro domain(s) IPR009169 Calreticulin "	1	1	Solyc01g100380.1.1	M3(Oxidation)	CID	1	0	1	1	0	1.53e-08	601	587	4.98	0	1658.71	1	35	15	2577000	3	785.04	2353.11	0	0.21	46.28	4219	4219	MS2	32/76	32	76	AC3.RAW
High	C	2	IDELVEEAVEFADESPHPVR	16651	Unambiguous	genomic_reference:SL2.31ch12 evidence_code:10F0H1E1IEG gene_region:2683408-2687114 functional_description:"Pyruvate dehydrogenase E1 component alpha subunit (AHRD V1 ***- Q5N030_SYNP6); contains Interpro domain(s) IPR017597 Pyruvate dehydrogenase (acetyl-transferring) E1 component, alpha subunit, subgroup y "	2	1	Solyc12g009400.1.1		CID	1	0	1	1	0	8.2e-11	665	677	4.25	0	982.59	0	3	22	1421000	3	761.038	2281.1	0	0.49	59.4	5302	5302	MS2	32/76	32	76	AC3.RAW
High	F	2	YSGALESFYEKFDPDFINIR	18537	Unambiguous	genomic_reference:SL2.31ch12 evidence_code:10F1H1E1IEG gene_region:47132509-47140184 functional_description:"V-type ATP synthase alpha chain (AHRD V1 ***- VATA_METTH); contains Interpro domain(s) IPR005725 ATPase, V1 complex, subunit A "	2	1	Solyc12g055800.1.1		CID	1	0	1	1	0	1.29e-12	698	674	3.77	0	1550.91	1	33	25	392900	3	804.39	2411.16	0	0.38	71.35	6409	6409	MS2	32/76	32	76	AH4.RAW
High	G	2	FITDVGATINHDPEIGDLLK	14990	Unambiguous	genomic_reference:SL2.31ch03 evidence_code:10F0H1E1IEG gene_region:38800465-38808751 functional_description:"Phosphorylase (AHRD V1 **** B9SJB6_RICCO); contains Interpro domain(s) IPR011833 Glycogen/starch/alpha-glucan phosphorylase "	1	1	Solyc03g065340.1.1		CID	1	0	1	1	0	3.15e-16	522	539	3.49	0	767.15	0	15	19	1990000	3	723.38	2168.13	0	1.59	51.86	4748	4748	MS2	32/76	32	76	EAC2.RAW
High	H	2	TAAYGHFGRDDADFTWETVK	10595	Unambiguous	genomic_reference:SL2.31ch10 evidence_code:10F0H1E1IEG gene_region:62988505-62989677 functional_description:"S-adenosylmethionine synthase (AHRD V1 ***- B5LAW6_CAPAN); contains Interpro domain(s) IPR002133 S-adenosylmethionine synthetase "	1	1	Solyc10g083970.1.1		CID	1	0	1	1	0	1.27e-05	470	461	3.69	0	1656.46	1	4	24	1813000	3	763.019	2287.04	0	0.7	39.09	3676	3676	MS2	32/76	32	76	EAC3_150410225534.RAW
High	K	2	VSQmIEDHEPFEGEALLDAK	10975	Unambiguous	genomic_reference:SL2.31ch11 evidence_code:10F0H1E1IEG gene_region:16767601-16769691 functional_description:"Elongation factor 1-gamma (AHRD V1 ***- B7SDI2_ORYSJ); contains Interpro domain(s) IPR001662 Translation elongation factor EF1B, gamma chain, conserved "	1	1	Solyc11g028100.1.1	M4(Oxidation)	CID	1	0	1	1	0	8.51e-08	504	507	4.58	0	1639.14	0	17	25	761300	3	758.69	2274.06	0	-1.25	39.18	3666	3666	MS2	32/76	32	76	EAH2.RAW
High	K	2	YRVENLYEGPLDDAYANAIR	13960	Unambiguous	genomic_reference:SL2.31ch08 evidence_code:10F0H1E1IEG gene_region:49546658-49549476 functional_description:"Elongation factor EF-2 (AHRD V1 **** Q9SGT4_ARATH); contains Interpro domain(s) IPR000795 Protein synthesis factor, GTP-binding "	2	1	Solyc08g062920.1.1		CID	1	0	1	1	0	0.00055	626	614	4.28	0	2094.48	1	3	19	1625000	3	781.386	2342.14	0	0.77	49.44	4545	4545	MS2	32/76	32	76	EAH2.RAW
High	K	2	FITDVGATINHDPEIGDLLK	14990	Unambiguous	genomic_reference:SL2.31ch03 evidence_code:10F0H1E1IEG gene_region:38800465-38808751 functional_description:"Phosphorylase (AHRD V1 **** B9SJB6_RICCO); contains Interpro domain(s) IPR011833 Glycogen/starch/alpha-glucan phosphorylase "	1	1	Solyc03g065340.1.1		CID	1	0	1	1	0	9.87e-07	530	534	3.25	0	677	0	15	24	1259000	3	723.38	2168.12	0	0.32	53.61	4899	4899	MS2	32/76	32	76	EAH2.RAW
High	K	2	FDDGLPPILTALEVLDNQIR	21890	Unambiguous	genomic_reference:SL2.31ch04 evidence_code:10F1H1E1IEG gene_region:1237570-1241219 functional_description:"ATP synthase subunit beta (AHRD V1 ***- O82722_NICSY); contains Interpro domain(s) IPR005722 ATPase, F1 complex, beta subunit "	1	1	Solyc04g007550.1.1		CID	1	0	1	1	0	5.39e-08	401	360	3.09	0	1293.54	0	2	25	422200	3	747.071	2239.2	0	0.96	96.33	8510	8510	MS2	32/76	32	76	EAH2.RAW
High	A	2	DFDEPGHLAPTGLFLAGTK	13920	Unambiguous	genomic_reference:SL2.31ch12 evidence_code:10F0H1E0IEG gene_region:45136185-45136828 functional_description:"Profilin (AHRD V1 ***- Q9SMC0_TOBAC); contains Interpro domain(s) IPR005455 Profilin, plant "	1	1	Solyc12g044630.1.1		CID	1	0	1	1	0	6.95e-09	614	615	3.82	0	1768.68	0	12	25	1936000	3	662.67	1986	0	-0.16	49.99	4519	4519	MS2	32/72	32	72	AC1.RAW
High	D	2	QAFDEAIAELDTLSEESYK	18043	Unambiguous	genomic_reference:SL2.31ch01 evidence_code:10F0H1E0IEG gene_region:5171992-5174989 functional_description:"14-3-3-like protein GF14 epsilon (AHRD V1 **-- 14310_ARATH); contains Interpro domain(s) IPR000308 14-3-3 protein "|genomic_reference:SL2.31ch05 evidence_code:10F0H1E1IEG gene_region:5666223-5669351 functional_description:"14-3-3 protein sigma gamma zeta beta/alpha (AHRD V1 **-- Q16QZ7_AEDAE…	2	2	Solyc01g010360.1.1;Solyc05g012420.1.1		CID	1	0	1	1	0	3.25e-06	563	490	4.18	0	1129.12	0	6	25	1454000	3	720.339	2159	0	0.53	65.4	5771	5771	MS2	32/72	32	72	AH2.RAW
High	E	2	DFDEPGHLAPTGLFLAGTK	13920	Unambiguous	genomic_reference:SL2.31ch12 evidence_code:10F0H1E0IEG gene_region:45136185-45136828 functional_description:"Profilin (AHRD V1 ***- Q9SMC0_TOBAC); contains Interpro domain(s) IPR005455 Profilin, plant "	1	1	Solyc12g044630.1.1		CID	1	0	1	1	0	0.00131	615	616	3.24	0	1789.79	0	2	25	833500	3	662.67	1986	0	-0.16	54.3	4888	4888	MS2	32/72	32	72	AH3.RAW
High	A	2	YAADEDAFFADYAEAHLK	14432	Unambiguous	genomic_reference:SL2.31ch06 evidence_code:10F1H1E1IEG gene_region:182627-184940 functional_description:"Ascorbate peroxidase (AHRD V1 ***- Q9SMD3_SOLLC); contains Interpro domain(s) IPR019793 Peroxidases heam-ligand binding site IPR019794 Peroxidase, active site IPR002016 Haem peroxidase, plant/fungal/bacterial "	2	1	Solyc06g005160.1.1		CID	1	0	1	1	0	3.22e-09	294	278	4.69	0	666.86	0	10	23	1875000	3	682.974	2046.91	0	0.24	51.78	4669	4669	MS2	32/68	32	68	AC1.RAW
High	A	2	LLEVDPDGAILAIGDMmR	14760	Unambiguous	genomic_reference:SL2.31ch11 evidence_code:10F1H1E1IEG gene_region:2859715-2863853 functional_description:"Acyl- (AHRD V1 ***- Q4JIJ4_9ROSI); contains Interpro domain(s) IPR005067 Fatty acid desaturase, type 2 "	1	1	Solyc11g008680.1.1	M17(Oxidation)	CID		0.019	2	2	0	1.04e-06	616	619	3.61	0	1753.05	0	27	25	461900	3	648.997	1944.98	0	0.27	61.96	5517	5517	MS2	32/68	32	68	AC1.RAW
High	B	2	HTDVLDAITQHLEIGSYR	38215	Unambiguous	genomic_reference:SL2.31ch07 evidence_code:10F1H1E1IEG gene_region:62455643-62461072 functional_description:"Phosphoenolpyruvate carboxylase 2 (AHRD V1 ***- Q9SCB2_SOLLC); contains Interpro domain(s) IPR015813 Pyruvate/Phosphoenolpyruvate kinase, catalytic core IPR001449 Phosphoenolpyruvate carboxylase "	3	1	Solyc07g062530.1.1		CID	1	0	1	1	0	2.15e-06	559	578	3.84	0	2020.28	0	7	25	400200	3	690.021	2068.05	0	1.95	57.72	5191	5191	MS2	32/68	32	68	AC2.RAW
High	D	2	VFEVSLADLQKDEDQAFR	15460	Unambiguous	genomic_reference:SL2.31ch03 evidence_code:10F1H1E1IEG gene_region:53730005-53732068 functional_description:"40S ribosomal protein S1 (AHRD V1 ***- RS3A_LENED); contains Interpro domain(s) IPR001593 Ribosomal protein S3Ae "|genomic_reference:SL2.31ch06 evidence_code:10F1H1E1IEG gene_region:41101725-41104317 functional_description:"40S ribosomal protein S1 (AHRD V1 ***- RS3A_LACBS); contains Inter…	2	2	Solyc03g097900.1.1;Solyc06g072490.1.1		CID	1	0	1	1	0	8.36e-07	659	672	3.5	0	1230.04	1	4	25	2090000	3	704.02	2110.05	0	0.65	54.08	4835	4835	MS2	32/68	32	68	AH2.RAW
High	D	2	LLEVDPDGAILAIGDmMR	14760	Unambiguous	genomic_reference:SL2.31ch11 evidence_code:10F1H1E1IEG gene_region:2859715-2863853 functional_description:"Acyl- (AHRD V1 ***- Q4JIJ4_9ROSI); contains Interpro domain(s) IPR005067 Fatty acid desaturase, type 2 "	1	1	Solyc11g008680.1.1	M16(Oxidation)	CID	0.0293	0	1	1	0	1.77e-08	607	608	3.41	0	1696.85	0	30	25	245600	3	648.999	1944.98	0	2.53	60.89	5398	5398	MS2	32/68	32	68	AH2.RAW
High	E	2	LLEVDPDGAILAIGDmmR	14760	Unambiguous	genomic_reference:SL2.31ch11 evidence_code:10F1H1E1IEG gene_region:2859715-2863853 functional_description:"Acyl- (AHRD V1 ***- Q4JIJ4_9ROSI); contains Interpro domain(s) IPR005067 Fatty acid desaturase, type 2 "	1	1	Solyc11g008680.1.1	M16(Oxidation); M17(Oxidation)	CID	1	0	1	1	0	0.000918	683	622	3.29	0	1538.68	0	18	25	327800	3	654.33	1960.98	0	1.99	57.28	5135	5135	MS2	32/68	32	68	AH3.RAW
High	G	2	YAADEDAFFADYAEAHLK	14432	Unambiguous	genomic_reference:SL2.31ch06 evidence_code:10F1H1E1IEG gene_region:182627-184940 functional_description:"Ascorbate peroxidase (AHRD V1 ***- Q9SMD3_SOLLC); contains Interpro domain(s) IPR019793 Peroxidases heam-ligand binding site IPR019794 Peroxidase, active site IPR002016 Haem peroxidase, plant/fungal/bacterial "	2	1	Solyc06g005160.1.1		CID	1	0	1	1	0	3.15e-16	291	278	3.43	0	735.31	0	14	17	2436000	3	682.974	2046.91	0	-0.02	49.44	4545	4545	MS2	32/68	32	68	EAC2.RAW
High	G	2	HTDVLDAITQHLEIGSYR	38215	Unambiguous	genomic_reference:SL2.31ch07 evidence_code:10F1H1E1IEG gene_region:62455643-62461072 functional_description:"Phosphoenolpyruvate carboxylase 2 (AHRD V1 ***- Q9SCB2_SOLLC); contains Interpro domain(s) IPR015813 Pyruvate/Phosphoenolpyruvate kinase, catalytic core IPR001449 Phosphoenolpyruvate carboxylase "	3	1	Solyc07g062530.1.1		CID	1	0	1	1	0	3.15e-16	567	599	3.78	0	2038.49	0	30	25	829500	3	690.02	2068.05	0	0.45	55.64	5062	5062	MS2	32/68	32	68	EAC2.RAW
High	G	2	MIQAVDDMLSHDIPELLK	17096	Unambiguous	genomic_reference:SL2.31ch11 evidence_code:10F0H1E1IEG gene_region:4963684-4968355 functional_description:"EH-domain-containing protein 1 (AHRD V1 **-* B6U193_MAIZE); contains Interpro domain(s) IPR001401 Dynamin, GTPase region "	1	1	Solyc11g012020.1.1		CID	1	0	1	1	0	3.15e-16	580	602	3.36	0	1489.59	0	18	25	866700	3	690.021	2068.05	0	0.92	65.77	5899	5899	MS2	32/68	32	68	EAC2.RAW
High	I	2	QLEEAEIDAIVAEIEAEK	19072	Unambiguous	genomic_reference:SL2.31ch01 evidence_code:10F1H1E1IEG gene_region:89447148-89449678 functional_description:"Proteasome subunit alpha type (AHRD V1 ***- Q38HT8_SOLTU); contains Interpro domain(s) IPR000426 Proteasome, alpha-subunit, conserved site "	1	1	Solyc01g111450.1.1		CID	1	0	1	1	0	9.07e-08	585	589	4.57	0	2273.75	0	33	25	242000	3	667.341	2000.01	0	0.21	69.1	6235	6235	MS2	32/68	32	68	EAC4_150411011441.RAW
High	K	2	YSNSNIEIHTFNQSQYPR	187626	Unambiguous	genomic_reference:SL2.31ch05 evidence_code:10F0H1E1IEG gene_region:63182582-63189858 functional_description:"UTP-glucose 1 phosphate uridylyltransferase (AHRD V1 **** B3VDY8_EUCGR); contains Interpro domain(s) IPR016267 UTP--glucose-1-phosphate uridylyltransferase, subgroup "	1	1	Solyc05g054060.1.1		CID	1	0	1	1	0	1.89e-10	546	525	4.77	0	1659.3	0	24	25	1073000	3	733.348	2198.03	0	1.44	29.02	2770	2770	MS2	32/68	32	68	EAH2.RAW
High	B	2	VKDELVLDGNDIELVSR	12186	Unambiguous	genomic_reference:SL2.31ch12 evidence_code:10F1H1E1IEG gene_region:63856222-63858136 functional_description:"Ribosomal L9-like protein (AHRD V1 ***- B3TLR1_ELAGV); contains Interpro domain(s) IPR002359 Ribosomal protein L6, conserved site-2 "	3	1	Solyc12g096700.1.1		CID	1	0	1	1	0	2.83e-06	411	432	4.14	0	1967.38	1	3	25	490300	3	638.677	1914.02	0	-0.5	43.33	3986	3986	MS2	32/64	32	64	AC2.RAW
High	G	2	EDIAIVLISQYVANMIR	21219	Unambiguous	genomic_reference:SL2.31ch02 evidence_code:10F1H1E1IEG gene_region:32972773-32977550 functional_description:"Vacuolar ATPase F subunit (AHRD V1 **** B8Y6I1_HEVBR); contains Interpro domain(s) IPR005772 ATPase, V1 complex, subunit F, eukaryotic "	1	1	Solyc02g068450.1.1		CID	1	0	1	1	0	3.15e-16	350	378	4.34	0	1904.58	0	0	25	133400	3	650.025	1948.06	0	1.09	97.59	8530	8530	MS2	32/64	32	64	EAC2.RAW
High	H	2	DRYIPDDAMIEGSHGLR	7045	Unambiguous	genomic_reference:SL2.31ch10 evidence_code:10F0H1E0IEG gene_region:64082694-64085929 functional_description:"Beta-fructofuranosidase insoluble isoenzyme 2 (AHRD V1 **-* B6U1H5_MAIZE); contains Interpro domain(s) IPR001362 Glycoside hydrolase, family 32 "	1	1	Solyc10g085640.1.1		CID	1	0	1	1	0	3.45e-05	539	549	4.48	0	1786.33	1	12	25	1323000	3	648.98	1944.92	0	0.4	33.35	3166	3166	MS2	32/64	32	64	EAC3_150410225534.RAW
High	I	2	DRYIPDDAmIEGSHGLR	7045	Unambiguous	genomic_reference:SL2.31ch10 evidence_code:10F0H1E0IEG gene_region:64082694-64085929 functional_description:"Beta-fructofuranosidase insoluble isoenzyme 2 (AHRD V1 **-* B6U1H5_MAIZE); contains Interpro domain(s) IPR001362 Glycoside hydrolase, family 32 "	1	1	Solyc10g085640.1.1	M9(Oxidation)	CID	1	0	1	1	0	1.91e-08	464	425	4.42	0	1430.49	1	31	25	837300	3	654.311	1960.92	0	0.81	27.85	2662	2662	MS2	32/64	32	64	EAC4_150411011441.RAW
High	J	2	EDIAIVLISQYVANMIR	21219	Unambiguous	genomic_reference:SL2.31ch02 evidence_code:10F1H1E1IEG gene_region:32972773-32977550 functional_description:"Vacuolar ATPase F subunit (AHRD V1 **** B8Y6I1_HEVBR); contains Interpro domain(s) IPR005772 ATPase, V1 complex, subunit F, eukaryotic "	1	1	Solyc02g068450.1.1		CID	1	0	1	1	0	1.93e-06	394	414	5.78	0	1859.08	0	4	25	121900	3	650.024	1948.06	0	0.24	97.65	8697	8697	MS2	32/64	32	64	EAH1.RAW
High	K	2	DRYIPDDAMIEGSHGLR	7045	Unambiguous	genomic_reference:SL2.31ch10 evidence_code:10F0H1E0IEG gene_region:64082694-64085929 functional_description:"Beta-fructofuranosidase insoluble isoenzyme 2 (AHRD V1 **-* B6U1H5_MAIZE); contains Interpro domain(s) IPR001362 Glycoside hydrolase, family 32 "	1	1	Solyc10g085640.1.1		CID	1	0	1	1	0	9.63e-07	537	545	4.07	0	1720.67	1	42	25	483400	3	648.98	1944.92	0	0.49	31.96	3032	3032	MS2	32/64	32	64	EAH2.RAW
High	K	2	VKDELVLDGNDIELVSR	12186	Unambiguous	genomic_reference:SL2.31ch12 evidence_code:10F1H1E1IEG gene_region:63856222-63858136 functional_description:"Ribosomal L9-like protein (AHRD V1 ***- B3TLR1_ELAGV); contains Interpro domain(s) IPR002359 Ribosomal protein L6, conserved site-2 "	3	1	Solyc12g096700.1.1		CID	1	0	1	1	0	8.9e-08	442	462	3.66	0	1869.37	1	15	25	1970000	3	638.678	1914.02	0	0.56	43.87	4071	4071	MS2	32/64	32	64	EAH2.RAW
High	L	2	IEDLSSQLQTQAAQQFR	11512	Unambiguous	genomic_reference:SL2.31ch03 evidence_code:10F0H1E1IEG gene_region:45599230-45600851 functional_description:"Nascent polypeptide-associated complex alpha subunit-like protein (AHRD V1 ***- B6SU89_MAIZE); contains Interpro domain(s) IPR016641 Nascent polypeptide-associated complex, alpha subunit "	1	1	Solyc03g080160.1.1		CID	1	0	1	1	0	3.19e-16	649	665	4.72	0	1903.75	0	15	25	259200	3	655.001	1962.99	0	0.37	42.85	3974	3974	MS2	32/64	32	64	EAH4.RAW
High	C	2	DDLRLPTDENLLSLIK	17279	Unambiguous	genomic_reference:SL2.31ch04 evidence_code:10F1H1E1IEG gene_region:342655-344857 functional_description:"Eukaryotic translation initiation factor 5A (AHRD V1 **** D6N3G5_GOSHI); contains Interpro domain(s) IPR001884 Translation elongation factor, IF5A "	3	1	Solyc04g005510.1.1		CID	1	0	1	1	0	4.41e-07	345	358	3.57	0	1488.13	1	4	25	1002000	3	619.011	1855.02	0	0.35	62.15	5526	5526	MS2	32/60	32	60	AC3.RAW
High	D	2	YPIEHGIVSNWDDMEK	9134	Unambiguous	genomic_reference:SL2.31ch03 evidence_code:10F1H1E1IEG gene_region:44382119-44383552 functional_description:"Actin (AHRD V1 ***- Q7XZJ2_GOSHI); contains Interpro domain(s) IPR004000 Actin/actin-like "|genomic_reference:SL2.31ch10 evidence_code:10F1H1E1IEG gene_region:61080001-61081737 functional_description:"Actin (AHRD V1 ***- B5M4V6_TOBAC); contains Interpro domain(s) IPR004000 Actin/actin-like…	8	4	Solyc03g078400.1.1;Solyc01g104770.1.1;Solyc06g076090.1.1;Solyc11g065990.1.1		CID	1	0	1	1	0	1.4e-07	359	340	3.79	0	1858.92	0	21	20	1127000	3	644.965	1932.88	0	0.99	38.96	3557	3557	MS2	32/60	32	60	AH2.RAW
High	L	2	IINEPTAAAIAYGLDK	12392	Unambiguous	genomic_reference:SL2.31ch03 evidence_code:10F0H1E1IEG gene_region:46342239-46344791 functional_description:"Heat shock protein (AHRD V1 ***- Q84KP8_CYAME); contains Interpro domain(s) IPR013126 Heat shock protein 70 "|genomic_reference:SL2.31ch03 evidence_code:10F0H1E1IEG gene_region:60777888-60779852 functional_description:"heat shock protein (AHRD V1 ***- B2D2G5_CAPSN); contains Interpro domai…	12	8	Solyc03g082920.1.1;Solyc03g117630.1.1;Solyc04g011440.1.1;Solyc06g076020.1.1;Solyc08g082820.1.1;Solyc09g010630.1.1;Solyc11g066060.1.1;Solyc11g066100.1.1		CID	1	0	1	1	0	3.19e-16	463	490	4.12	0	1653.52	0	19	25	184800	3	553.97	1659.9	0	-0.07	46.46	4284	4284	MS2	32/60	32	60	EAH4.RAW
High	A	2	DPSGQDINALEQHIK	8971	Unambiguous	genomic_reference:SL2.31ch02 evidence_code:10F0H1E0IEG gene_region:31467995-31470278 functional_description:"Alpha-1 4-glucan-protein synthase (UDP-forming) (AHRD V1 **-* Q2HV87_MEDTR); contains Interpro domain(s) IPR004901 Alpha-1,4-glucan-protein synthase, UDP-forming "	1	1	Solyc02g065740.1.1		CID	1	0	1	1	0	2.13e-07	564	558	3.72	0	1734.02	0	8	25	1163000	3	555.613	1664.82	0	-0.38	32.66	3033	3033	MS2	32/56	32	56	AC1.RAW
High	C	2	TGTIPDKDILVLIK	13178	Unambiguous	genomic_reference:SL2.31ch09 evidence_code:10F1H1E1IEG gene_region:1749910-1751082 functional_description:"S-adenosylmethionine synthase (AHRD V1 ***- B5LAW6_CAPAN); contains Interpro domain(s) IPR002133 S-adenosylmethionine synthetase "|genomic_reference:SL2.31ch10 evidence_code:10F0H1E1IEG gene_region:62988505-62989677 functional_description:"S-adenosylmethionine synthase (AHRD V1 ***- B5LAW6_C…	2	2	Solyc09g008280.1.1;Solyc10g083970.1.1		CID	1	0	1	1	0	5.77e-08	101	108	3.08	0	2178.78	1	0	25	451500	3	509.312	1525.92	0	0.28	46	4195	4195	MS2	32/52	32	52	AC3.RAW
High	K	2	FRTDLPTGGLANVASTFmNLHGYEAPSDYEPTLIEVVDN	20651	Unambiguous	genomic_reference:SL2.31ch07 evidence_code:10F1H1E1IEG gene_region:55219265-55224407 functional_description:"2 3-bisphosphoglycerate-independent phosphoglycerate mutase (AHRD V1 **** B9S1V6_RICCO); contains Interpro domain(s) IPR005995 Phosphoglycerate mutase, 2,3-bisphosphoglycerate-independent "	1	1	Solyc07g044840.1.1	M18(Oxidation)	CID	1	0	1	1	0	2.6e-05	663	649	3.65	0	630.91	1	0	25	470400	3	1424.01	4270.03	0	0.25	72.7	6503	6503	MS2	32/152	32	152	EAH2.RAW
High	G	2	GALDYEDFRDVDmVIEAVIENVSLK	148938	Unambiguous	genomic_reference:SL2.31ch12 evidence_code:10F1H1E1IEG gene_region:64932184-64939862 functional_description:"Fatty acid oxidation complex subunit alpha (AHRD V1 ***- FADJ_ECOHS); contains Interpro domain(s) IPR006176 3-hydroxyacyl-CoA dehydrogenase, NAD binding "	1	1	Solyc12g099440.1.1	M13(Oxidation)	CID	1	0	1	1	0	3.15e-16	719	733	4.45	0	709.87	1	27	25	89660	4	714.855	2856.4	0	-0.07	97.21	8497	8497	MS2	32/144	32	144	EAC2.RAW
High	F	2	WGTVPEYQQQAIQQPHIPETVEAEIVEPGEAGGQK	118094	Unambiguous	genomic_reference:SL2.31ch07 evidence_code:10F0H1E1IEG gene_region:56329845-56335708 functional_description:"Chaperone protein htpG (AHRD V1 ***- HTPG_IDILO); contains Interpro domain(s) IPR001404 Heat shock protein Hsp90 "	1	1	Solyc07g047790.1.1		CID	1	0	1	1	0	0.000472	669	684	3.78	0	656.93	0	0	25	114900	3	1281.96	3843.88	0	-0.78	53.86	4959	4959	MS2	32/136	32	136	AH4.RAW
High	J	2	VGDGFTEGVEQGPLINEAAVQKVEYFVDEATSK	42128	Unambiguous	genomic_reference:SL2.31ch09 evidence_code:10F1H1E1IEG gene_region:65491459-65493027 functional_description:"Succinate semialdehyde dehydrogenase (AHRD V1 **** B6TPI6_MAIZE); contains Interpro domain(s) IPR015590 Aldehyde dehydrogenase "	1	1	Solyc09g090700.1.1		CID	1	0	1	1	0	0.00122	621	653	4.47	0	632.23	1	6	25	315700	3	1176.25	3526.73	0	1.68	77.89	7067	7067	MS2	32/128	32	128	EAH1.RAW
High	A	2	WNYDGSSTGQASGEDSEVILYPQAIFKDPFR	18035	Unambiguous	genomic_reference:SL2.31ch05 evidence_code:10F0H1E1IEG gene_region:60677361-60680424 functional_description:"Glutamine synthetase (AHRD V1 ***- A9PB10_POPTR); contains Interpro domain(s) IPR008146 Glutamine synthetase, catalytic region "	1	1	Solyc05g051250.1.1		CID	1	0	1	1	0	1.6e-06	607	575	5.85	0	1106.02	1	3	25	1769000	3	1159.88	3477.63	0	1.72	66.01	5851	5851	MS2	32/120	32	120	AC1.RAW
High	B	2	WNYDGSSTGQASGEDSEVILYPQAIFKDPFR	18035	Unambiguous	genomic_reference:SL2.31ch05 evidence_code:10F0H1E1IEG gene_region:60677361-60680424 functional_description:"Glutamine synthetase (AHRD V1 ***- A9PB10_POPTR); contains Interpro domain(s) IPR008146 Glutamine synthetase, catalytic region "	1	1	Solyc05g051250.1.1		CID	1	0	1	1	0	0.000232	617	579	3.71	0	873.96	1	3	25	269000	3	1159.89	3477.64	0.01	4.88	65.02	5795	5795	MS2	32/120	32	120	AC2.RAW
High	D	2	TTGIVMDSGDGVSHTVPIYEGYALPHAILR	14960	Unambiguous	genomic_reference:SL2.31ch06 evidence_code:10F0H1E1IEG gene_region:43631077-43633248 functional_description:"Actin (AHRD V1 ***- B5M4V6_TOBAC); contains Interpro domain(s) IPR004000 Actin/actin-like "|genomic_reference:SL2.31ch11 evidence_code:10F0H1E1IEG gene_region:48685769-48687049 functional_description:"Actin (AHRD V1 ***- B5M4V6_TOBAC); contains Interpro domain(s) IPR004000 Actin/actin-like…	2	2	Solyc06g076090.1.1;Solyc11g065990.1.1		CID	1	0	1	1	0	2.23e-06	602	604	4.37	0	1089.4	0	5	25	547100	3	1057.2	3169.59	0	-1.37	52.31	4687	4687	MS2	32/116	32	116	AH2.RAW
High	E	2	TTGIVLDSGDGVSHTVPIYEGYALPHAILR	15317	Unambiguous	genomic_reference:SL2.31ch03 evidence_code:10F1H1E1IEG gene_region:44382119-44383552 functional_description:"Actin (AHRD V1 ***- Q7XZJ2_GOSHI); contains Interpro domain(s) IPR004000 Actin/actin-like "|genomic_reference:SL2.31ch10 evidence_code:10F1H1E1IEG gene_region:61080001-61081737 functional_description:"Actin (AHRD V1 ***- B5M4V6_TOBAC); contains Interpro domain(s) IPR004000 Actin/actin-like…	8	3	Solyc03g078400.1.1;Solyc01g104770.1.1;Solyc10g086460.1.1		CID	1	0	1	1	0	0.0125	431	401	4.06	0	958.29	0	0	25	733600	3	1051.22	3151.65	0	2.11	58.8	5261	5261	MS2	32/116	32	116	AH3.RAW
High	F	2	TTGIVLDSGDGVSHTVPIYEGYALPHAILR	15317	Unambiguous	genomic_reference:SL2.31ch03 evidence_code:10F1H1E1IEG gene_region:44382119-44383552 functional_description:"Actin (AHRD V1 ***- Q7XZJ2_GOSHI); contains Interpro domain(s) IPR004000 Actin/actin-like "|genomic_reference:SL2.31ch10 evidence_code:10F1H1E1IEG gene_region:61080001-61081737 functional_description:"Actin (AHRD V1 ***- B5M4V6_TOBAC); contains Interpro domain(s) IPR004000 Actin/actin-like…	8	3	Solyc03g078400.1.1;Solyc01g104770.1.1;Solyc10g086460.1.1		CID	1	0	1	1	0	1.61e-05	419	392	3.43	0	813.84	0	0	25	189900	3	1051.22	3151.65	0	2.58	57.06	5226	5226	MS2	32/116	32	116	AH4.RAW
High	H	2	TTGIVLDSGDGVSHTVPIYEGYALPHAILR	15317	Unambiguous	genomic_reference:SL2.31ch03 evidence_code:10F1H1E1IEG gene_region:44382119-44383552 functional_description:"Actin (AHRD V1 ***- Q7XZJ2_GOSHI); contains Interpro domain(s) IPR004000 Actin/actin-like "|genomic_reference:SL2.31ch10 evidence_code:10F1H1E1IEG gene_region:61080001-61081737 functional_description:"Actin (AHRD V1 ***- B5M4V6_TOBAC); contains Interpro domain(s) IPR004000 Actin/actin-like…	8	3	Solyc03g078400.1.1;Solyc01g104770.1.1;Solyc10g086460.1.1		CID	1	0	1	1	0	7.46e-06	464	447	5.29	0	1155.87	0	0	25	1711000	3	1051.22	3151.64	0	-0.44	55.86	5113	5113	MS2	32/116	32	116	EAC3_150410225534.RAW
High	I	2	TTGIVLDSGDGVSHTVPIYEGYALPHAILR	15317	Unambiguous	genomic_reference:SL2.31ch03 evidence_code:10F1H1E1IEG gene_region:44382119-44383552 functional_description:"Actin (AHRD V1 ***- Q7XZJ2_GOSHI); contains Interpro domain(s) IPR004000 Actin/actin-like "|genomic_reference:SL2.31ch10 evidence_code:10F1H1E1IEG gene_region:61080001-61081737 functional_description:"Actin (AHRD V1 ***- B5M4V6_TOBAC); contains Interpro domain(s) IPR004000 Actin/actin-like…	8	3	Solyc03g078400.1.1;Solyc01g104770.1.1;Solyc10g086460.1.1		CID	1	0	1	1	0	1.61e-06	447	434	4.8	0	830.26	0	2	25	505200	3	1051.22	3151.65	0	0.95	54.98	5040	5040	MS2	32/116	32	116	EAC4_150411011441.RAW
High	G	2	YGQDATNVGDEGGFAPNIQENKEGLELLK	12881	Unambiguous	genomic_reference:SL2.31ch09 evidence_code:10F1H1E1IEG gene_region:2371333-2375783 functional_description:"Enolase (AHRD V1 ***- C5J0G6_TOBAC); contains Interpro domain(s) IPR000941 Enolase "|genomic_reference:SL2.31ch10 evidence_code:10F1H1E1IEG gene_region:63994775-63999383 functional_description:"Enolase (AHRD V1 ***- C5J0G6_TOBAC); contains Interpro domain(s) IPR000941 Enolase "	2	2	Solyc09g009020.1.1;Solyc10g085550.1.1		CID	1	0	1	1	0	3.15e-16	662	713	4.66	0	666.91	1	0	25	1261000	3	1036.17	3106.5	0	1.35	44.43	4125	4125	MS2	32/112	32	112	EAC2.RAW
High	G	2	VGYVGPAADFNYDHEHLGTDPQTLVEIAK	35850	Unambiguous	genomic_reference:SL2.31ch11 evidence_code:10F0H1E1IEG gene_region:4520419-4526063 functional_description:"NADH-ubiquinone oxidoreductase subunit (AHRD V1 ***- B9T118_RICCO); contains Interpro domain(s) IPR010228 NADH:ubiquinone oxidoreductase, subunit G "	1	1	Solyc11g011470.1.1		CID	1	0	1	1	0	3.15e-16	712	692	4.28	0	763.1	0	4	25	1697000	3	1052.85	3156.53	0	1.6	47.61	4393	4393	MS2	32/112	32	112	EAC2.RAW
High	L	2	mANDSVGPEVENLVAGLPEGGVVLLENVR	20218	Unambiguous	genomic_reference:SL2.31ch07 evidence_code:10F1H1E1IEG gene_region:65212571-65215004 functional_description:"Phosphoglycerate kinase (AHRD V1 ***- Q2VCK2_SOLTU); contains Interpro domain(s) IPR001576 Phosphoglycerate kinase "	1	1	Solyc07g066600.1.1	M1(Oxidation)	CID	1	0	1	1	0	3.19e-16	556	612	3.45	0	680.69	0	4	25	988300	3	998.515	2993.53	0	1.53	80.67	7171	7171	MS2	32/112	32	112	EAH4.RAW
High	A	2	YAAISQDNGLVPIVEPEILLDGDHPIER	17490	Unambiguous	genomic_reference:SL2.31ch05 evidence_code:10F1H1E1IEG gene_region:2917196-2920087 functional_description:"Fructose-bisphosphate aldolase (AHRD V1 ***- B9SJY9_RICCO); contains Interpro domain(s) IPR000741 Fructose-bisphosphate aldolase, class-I "	1	1	Solyc05g008600.1.1		CID	1	0	1	1	0	1.07e-05	500	483	3.5	0	662.01	0	0	25	1191000	3	1025.2	3073.58	0	0	63.89	5679	5679	MS2	32/108	32	108	AC1.RAW
High	K	2	YAAISQDNGLVPIVEPEILLDGDHPIER	17490	Unambiguous	genomic_reference:SL2.31ch05 evidence_code:10F1H1E1IEG gene_region:2917196-2920087 functional_description:"Fructose-bisphosphate aldolase (AHRD V1 ***- B9SJY9_RICCO); contains Interpro domain(s) IPR000741 Fructose-bisphosphate aldolase, class-I "	1	1	Solyc05g008600.1.1		CID	1	0	1	1	0	3.65e-08	493	478	4.24	0	578.08	0	1	25	2271000	3	1025.2	3073.59	0	0.71	63.94	5771	5771	MS2	32/108	32	108	EAH2.RAW
High	A	2	DKPLPSWSDSDVEEFIASDPLHGPTLR	17453	Unambiguous	genomic_reference:SL2.31ch06 evidence_code:10F1H1E1IEG gene_region:42013245-42016680 functional_description:"Unknown Protein (AHRD V1)"	1	1	Solyc06g073900.1.1		CID	1	0	1	1	0	7.03e-10	709	707	4.23	0	698.47	0	0	25	893200	3	1003.49	3008.47	0	1	63.79	5671	5671	MS2	32/104	32	104	AC1.RAW
High	D	2	DKPLPSWSDSDVEEFIASDPLHGPTLR	17453	Unambiguous	genomic_reference:SL2.31ch06 evidence_code:10F1H1E1IEG gene_region:42013245-42016680 functional_description:"Unknown Protein (AHRD V1)"	1	1	Solyc06g073900.1.1		CID	1	0	1	1	0	4.91e-06	705	706	4	0	615.66	0	11	25	570800	3	1003.49	3008.47	0	1.92	62.88	5564	5564	MS2	32/104	32	104	AH2.RAW
High	A	2	VDKGTVELPGTDGETTTQGLDGLAER	10517	Unambiguous	genomic_reference:SL2.31ch09 evidence_code:10F0H1E1IEG gene_region:2645029-2646904 functional_description:"Fructose-bisphosphate aldolase (AHRD V1 ***- Q2PYX3_SOLTU); contains Interpro domain(s) IPR000741 Fructose-bisphosphate aldolase, class-I "	1	1	Solyc09g009260.1.1		CID	1	0	1	1	0	1.1e-07	630	611	4.32	0	947.83	1	2	25	7699000	3	887.107	2659.31	0	-0.06	37.91	3493	3493	MS2	32/100	32	100	AC1.RAW
High	G	2	VDKGTVELPGTNGETTTQGLDGLAER	10312	Unambiguous	genomic_reference:SL2.31ch10 evidence_code:10F1H1E1IEG gene_region:62683898-62686621 functional_description:"Fructose-bisphosphate aldolase (AHRD V1 ***- Q308A5_SOLTU); contains Interpro domain(s) IPR000741 Fructose-bisphosphate aldolase, class-I "	1	1	Solyc10g083570.1.1		CID	1	0	1	1	0	3.15e-16	701	653	5.17	0	867.69	1	3	25	3445000	3	886.779	2658.32	0	0.5	35	3317	3317	MS2	32/100	32	100	EAC2.RAW
High	A	2	TNDLAGDGTTTSVVLAQGLIAEGVK	15814	Unambiguous	genomic_reference:SL2.31ch01 evidence_code:10F1H1E1IEG gene_region:33327275-33331326 functional_description:"chaperonin (AHRD V1 ***- B4VMY1_9CYAN); contains Interpro domain(s) IPR001844 Chaperonin Cpn60 "	1	1	Solyc01g028810.1.1		CID	1	0	1	1	0	8.63e-08	454	511	5.19	0	1207.63	0	13	25	977100	3	810.763	2430.28	0	1.31	56.94	5100	5100	MS2	31/96	31	96	AC1.RAW
High	H	2	ASAAEEEDDDDDVDLFGEETEEEKK	156421	Unambiguous	genomic_reference:SL2.31ch07 evidence_code:10F0H1E1IEG gene_region:6357245-6358823 functional_description:"Elongation factor 1-beta (AHRD V1 ***- D7KES3_ARALY); contains Interpro domain(s) IPR014038 Translation elongation factor EF1B, beta and delta chains, guanine nucleotide exchange "	1	1	Solyc07g016150.1.1		CID	1	0	1	1	0	9.89e-06	63	102	4.1	0	782.51	1	13	25	914200	3	939.054	2815.15	0	0.82	34.21	3244	3244	MS2	31/96	31	96	EAC3_150410225534.RAW
High	J	2	IGEGDLLTGGDLYATVFENSLmEHR	18596	Unambiguous	genomic_reference:SL2.31ch12 evidence_code:10F1H1E1IEG gene_region:47132509-47140184 functional_description:"V-type ATP synthase alpha chain (AHRD V1 ***- VATA_METTH); contains Interpro domain(s) IPR005725 ATPase, V1 complex, subunit A "	1	1	Solyc12g055800.1.1	M22(Oxidation)	CID	1	0	1	1	0	0.000945	679	690	4.38	0	851.85	0	12	25	948900	3	918.442	2753.31	0	1.37	68.99	6330	6330	MS2	31/96	31	96	EAH1.RAW
High	J	2	GAmLGLDQPVIIHMLDIEPAAESLK	15423	Unambiguous	genomic_reference:SL2.31ch01 evidence_code:10F1H1E1IEG gene_region:76111189-76113622 functional_description:"Malate dehydrogenase (AHRD V1 **** Q645N0_SOLLC); contains Interpro domain(s) IPR011274 Malate dehydrogenase, NAD-dependent, cytosolic "	1	1	Solyc01g090710.1.1	M3(Oxidation)	CID	1	0	1	1	0	0.000128	528	532	3.24	0	845.81	0	7	25	1723000	3	893.136	2677.39	0	-0.12	69.78	6396	6396	MS2	31/96	31	96	EAH1.RAW
High	K	2	ALLAIPTTIADNAGLDSAELIAQLR	20912	Unambiguous	genomic_reference:SL2.31ch11 evidence_code:10F1H1E1IEG gene_region:50651405-50656732 functional_description:"T-complex protein 1 subunit beta (AHRD V1 ***- B6T8X5_MAIZE); contains Interpro domain(s) IPR012716 T-complex protein 1, beta subunit "	1	1	Solyc11g069000.1.1		CID	1	0	1	1	0	5.87e-07	192	194	3.94	0	838.96	0	20	25	354700	3	850.81	2550.41	0	0.32	82.15	7277	7277	MS2	31/96	31	96	EAH2.RAW
High	L	2	ALLAIPTTIADNAGLDSAELIAQLR	20912	Unambiguous	genomic_reference:SL2.31ch11 evidence_code:10F1H1E1IEG gene_region:50651405-50656732 functional_description:"T-complex protein 1 subunit beta (AHRD V1 ***- B6T8X5_MAIZE); contains Interpro domain(s) IPR012716 T-complex protein 1, beta subunit "	1	1	Solyc11g069000.1.1		CID	1	0	1	1	0	3.19e-16	184	185	4.26	0	839.33	0	24	25	164900	3	850.81	2550.42	0	1.04	85.49	7569	7569	MS2	31/96	31	96	EAH4.RAW
High	D	2	DALAIVAEVMHQIKPEEIVGVAGK	84919	Unambiguous	genomic_reference:SL2.31ch11 evidence_code:10F0H1E1IEG gene_region:4520419-4526063 functional_description:"NADH-ubiquinone oxidoreductase subunit (AHRD V1 ***- B9T118_RICCO); contains Interpro domain(s) IPR010228 NADH:ubiquinone oxidoreductase, subunit G "	1	1	Solyc11g011470.1.1		CID	1	0	1	1	0	7.17e-06	271	280	3.6	0	805.15	0	12	25	192500	3	839.795	2517.37	0	-1.48	81.45	7087	7087	MS2	31/92	31	92	AH2.RAW
High	F	2	VETGVIKPGmVVTFGPTGLTTEVK	34881	Unambiguous	genomic_reference:SL2.31ch06 evidence_code:10F0H1E1IEG gene_region:36374-37800 functional_description:"Elongation factor 1-alpha (AHRD V1 ***- Q8H9C0_SOLTU); contains Interpro domain(s) IPR004539 Translation elongation factor EF1A, eukaryotic and archaeal IPR000795 Protein synthesis factor, GTP-binding "	3	1	Solyc06g005060.1.1	M10(Oxidation)	CID	1	0	1	1	0	3.15e-12	322	294	4.97	0	1150.12	0	10	25	1534000	3	826.117	2476.34	0	0.35	48.4	4495	4495	MS2	31/92	31	92	AH4.RAW
High	G	2	IESADSIPNLHSILTASDGAmVAR	36345	Unambiguous	genomic_reference:SL2.31ch08 evidence_code:10F1H1E1IEG gene_region:58253769-58260423 functional_description:"Pyruvate kinase (AHRD V1 **** Q53WS7_TOBAC); contains Interpro domain(s) IPR001697 Pyruvate kinase "|genomic_reference:SL2.31ch03 evidence_code:10F1H1E1IEG gene_region:2365137-2373478 functional_description:"Pyruvate kinase (AHRD V1 ***- A5BTB0_VITVI); contains Interpro domain(s) IPR001697…	2	2	Solyc08g077180.1.1;Solyc03g007810.1.1	M21(Oxidation)	CID	1	0	1	1	0	3.15e-16	678	646	4.53	0	1220.35	0	20	25	1109000	3	828.751	2484.24	0	-0.43	48.54	4470	4470	MS2	31/92	31	92	EAC2.RAW
High	G	2	IESADSIPNLHSIITASDGAmVAR	36345	Unambiguous	genomic_reference:SL2.31ch08 evidence_code:10F1H1E1IEG gene_region:58253769-58260423 functional_description:"Pyruvate kinase (AHRD V1 **** Q53WS7_TOBAC); contains Interpro domain(s) IPR001697 Pyruvate kinase "|genomic_reference:SL2.31ch03 evidence_code:10F1H1E1IEG gene_region:2365137-2373478 functional_description:"Pyruvate kinase (AHRD V1 ***- A5BTB0_VITVI); contains Interpro domain(s) IPR001697…	2	2	Solyc08g077180.1.1;Solyc03g007810.1.1	M21(Oxidation)	CID	1	0	1	2	0	3.15e-16	678	646	4.53	0	1220.35	0	20	25	1109000	3	828.751	2484.24	0	-0.43	48.54	4470	4470	MS2	31/92	31	92	EAC2.RAW
High	G	2	AHTDWVTAIATPIDNSDMIVTSSR	15270	Unambiguous	genomic_reference:SL2.31ch03 evidence_code:10F1H1E1IEG gene_region:61808534-61810189 functional_description:"Guanine nucleotide-binding protein beta subunit-like protein (AHRD V1 **-* B4FKM1_MAIZE); contains Interpro domain(s) IPR020472 G-protein beta WD-40 repeat, region "|genomic_reference:SL2.31ch06 evidence_code:10F1H1E1IEG gene_region:39209308-39211767 functional_description:"Guanine nucleot…	3	3	Solyc03g119040.1.1;Solyc06g069010.1.1;Solyc12g040510.1.1		CID	1	0	1	1	0	3.15e-16	690	603	4.09	0	1497.7	0	14	25	1073000	3	867.76	2601.27	0	1.9	52.96	4840	4840	MS2	31/92	31	92	EAC2.RAW
High	G	2	ELDYLVGAVSNPQKPFAAIVGGSK	15602	Unambiguous	genomic_reference:SL2.31ch07 evidence_code:10F1H1E1IEG gene_region:65212571-65215004 functional_description:"Phosphoglycerate kinase (AHRD V1 ***- Q2VCK2_SOLTU); contains Interpro domain(s) IPR001576 Phosphoglycerate kinase "	1	1	Solyc07g066600.1.1		CID	1	0	1	1	0	3.15e-16	389	351	3.45	0	929.82	0	15	22	1777000	3	820.776	2460.31	0	0.16	54.39	4959	4959	MS2	31/92	31	92	EAC2.RAW
High	G	2	DAGVLLSYDPNVRLPLWPSPEAAR	17821	Unambiguous	genomic_reference:SL2.31ch11 evidence_code:10F0H1E0IEG gene_region:34310265-34312777 functional_description:"5-dehydro-2-deoxygluconokinase (AHRD V1 **-- IOLC_GEOTN); contains Interpro domain(s) IPR011611 Carbohydrate/purine kinase "	1	1	Solyc11g042850.1.1		CID	1	0	1	1	0	8.67e-16	494	473	3.69	0	1136.64	1	7	25	2601000	3	879.467	2636.39	0	0.71	64.86	5823	5823	MS2	31/92	31	92	EAC2.RAW
High	G	2	FGNIELSPASGILNYGQGLFEGLK	19927	Rejected	genomic_reference:SL2.31ch03 evidence_code:10F0H1E1IEG gene_region:11507825-11514153 functional_description:"Branched-chain amino acid aminotransferase (AHRD V1 **** Q9SNY9_SOLTU); contains Interpro domain(s) IPR005786 Branched-chain amino acid aminotransferase II "	1	0			CID	0.0306	0	1	1	0	3.15e-16	504	532	3.92	0	1266.56	0	12	25	415300	3	842.108	2524.31	0	0.41	74.61	6627	6627	MS2	31/92	31	92	EAC2.RAW
High	L	2	LSQPNPDDLGHVDSVSVEEIGGVR	33854	Unambiguous	genomic_reference:SL2.31ch01 evidence_code:10F1H1E1IEG gene_region:74679334-74687600 functional_description:"T-complex protein theta subunit (AHRD V1 ***- A8IF08_CHLRE); contains Interpro domain(s) IPR012721 T-complex protein 1, theta subunit "	1	1	Solyc01g088080.1.1		CID	1	0	1	1	0	3.19e-16	683	742	3.28	0	530.33	0	13	25	148000	3	840.418	2519.24	0	0.94	44.11	4083	4083	MS2	31/92	31	92	EAH4.RAW
High	L	2	VETGVIKPGmVVTFGPTGLTTEVK	34881	Unambiguous	genomic_reference:SL2.31ch06 evidence_code:10F0H1E1IEG gene_region:36374-37800 functional_description:"Elongation factor 1-alpha (AHRD V1 ***- Q8H9C0_SOLTU); contains Interpro domain(s) IPR004539 Translation elongation factor EF1A, eukaryotic and archaeal IPR000795 Protein synthesis factor, GTP-binding "	3	1	Solyc06g005060.1.1	M10(Oxidation)	CID	1	0	1	1	0	3.19e-16	330	303	4.07	0	1144.02	0	15	25	289200	3	826.117	2476.34	0	0.28	47.94	4409	4409	MS2	31/92	31	92	EAH4.RAW
High	C	2	THTQDATPLTLGQEFSGYATQVK	57801	Unambiguous	genomic_reference:SL2.31ch09 evidence_code:10F1H1E1IEG gene_region:62645740-62653816 functional_description:"Fumarate hydratase class II (AHRD V1 ***- C5GAL1_AJEDR); contains Interpro domain(s) IPR005677 Fumarate hydratase, class II "	1	1	Solyc09g075450.1.1		CID	1	0	1	1	0	1.34e-06	676	628	4.67	0	1337.36	0	4	25	673200	3	831.747	2493.23	0	0.17	48.87	4434	4434	MS2	31/88	31	88	AC3.RAW
High	G	2	NPWPNVDAHSGVLLNYYGLTEAR	141319	Unambiguous	genomic_reference:SL2.31ch01 evidence_code:10F0H1E1IEG gene_region:70356544-70364647 functional_description:"Citrate synthase (AHRD V1 ***- O24135_TOBAC); contains Interpro domain(s) IPR010109 Citrate synthase, eukaryotic "	1	1	Solyc01g073740.1.1		CID	1	0	1	1	0	9.12e-16	611	624	4.5	0	1379.29	0	10	25	524900	3	862.765	2586.28	0	2.57	54.83	4995	4995	MS2	31/88	31	88	EAC2.RAW
High	G	2	AILGESNEFVGDKVAYALSQGLK	16917	Unambiguous	genomic_reference:SL2.31ch04 evidence_code:10F0H1E1IEG gene_region:3944492-3948735 functional_description:"Triosephosphate isomerase (AHRD V1 **** Q38JI4_SOLTU); contains Interpro domain(s) IPR000652 Triosephosphate isomerase "	1	1	Solyc04g011510.1.1		CID	1	0	1	1	0	3.15e-16	441	420	4.31	0	1134.88	1	90	17	1103000	3	803.761	2409.27	0	1.4	59.45	5376	5376	MS2	31/88	31	88	EAC2.RAW
High	H	2	GLLGDKANLSIYDPQVSEDQIQR	12279	Unambiguous	genomic_reference:SL2.31ch02 evidence_code:10F0H1E1IEG gene_region:31886439-31888009 functional_description:"UDP-D-glucose dehydrogenase (AHRD V1 ***- D2WK25_GOSHI); contains Interpro domain(s) IPR014028 UDP-glucose/GDP-mannose dehydrogenase, dimerisation and substrate-binding "	1	1	Solyc02g067080.1.1		CID	1	0	1	1	0	3.76e-05	635	657	4.49	0	1308.25	1	19	25	985500	3	853.775	2559.31	0	1.72	44.82	4173	4173	MS2	31/88	31	88	EAC3_150410225534.RAW
High	H	2	KLLDELGIPAEDVPVDQFTPLGR	16968	Unambiguous	genomic_reference:SL2.31ch05 evidence_code:10F1H1E1IEG gene_region:64416664-64419540 functional_description:"Isopentenyl-diphosphate delta-isomerase (AHRD V1 **** Q84RZ8_9GENT); contains Interpro domain(s) IPR011876 Isopentenyl-diphosphate delta-isomerase, type 1 "	1	1	Solyc05g055760.1.1		CID	1	0	1	1	0	4.63e-05	364	336	4.11	0	1222.21	1	7	25	541700	3	841.455	2522.35	0	0.55	65.35	5921	5921	MS2	31/88	31	88	EAC3_150410225534.RAW
High	A	2	AFKDLMAASWDELPDPVVYDAK	17662	Unambiguous	genomic_reference:SL2.31ch04 evidence_code:10F1H1E1IEG gene_region:61333457-61335633 functional_description:"Unknown Protein (AHRD V1)"	1	1	Solyc04g079180.1.1		CID	1	0	1	1	0	1.51e-07	680	729	4.63	0	693.92	1	11	25	624100	3	827.739	2481.2	0	0.91	64.51	5729	5729	MS2	31/84	31	84	AC1.RAW
High	A	2	LADVLELVGIPYLASITQSGGK	21002	Unambiguous	genomic_reference:SL2.31ch02 evidence_code:10F1H1E1IEG gene_region:49333355-49339785 functional_description:"Sulfite oxidase (AHRD V1 **** A5H1Q7_SOLLC); contains Interpro domain(s) IPR000572 Oxidoreductase, molybdopterin binding "	1	1	Solyc02g094120.1.1		CID	1	0	1	1	0	2.66e-07	205	209	4.35	0	1599.83	0	11	25	269200	3	748.755	2244.25	0	0.22	82.91	7231	7231	MS2	31/84	31	84	AC1.RAW
High	B	2	SGETEDTFIADLAVGLSTGQIK	19762	Unambiguous	genomic_reference:SL2.31ch09 evidence_code:10F1H1E1IEG gene_region:2371333-2375783 functional_description:"Enolase (AHRD V1 ***- C5J0G6_TOBAC); contains Interpro domain(s) IPR000941 Enolase "|genomic_reference:SL2.31ch10 evidence_code:10F1H1E1IEG gene_region:63994775-63999383 functional_description:"Enolase (AHRD V1 ***- C5J0G6_TOBAC); contains Interpro domain(s) IPR000941 Enolase "	2	2	Solyc09g009020.1.1;Solyc10g085550.1.1		CID	1	0	1	1	0	0.00112	637	654	3.37	0	480.07	0	28	25	453900	3	751.379	2252.12	0	-2.71	74.01	6535	6535	MS2	31/84	31	84	AC2.RAW
High	C	2	AFKDLMAASWDELPDPVVYDAK	17662	Unambiguous	genomic_reference:SL2.31ch04 evidence_code:10F1H1E1IEG gene_region:61333457-61335633 functional_description:"Unknown Protein (AHRD V1)"	1	1	Solyc04g079180.1.1		CID	1	0	1	1	0	4.08e-06	695	740	3.96	0	651.84	1	8	25	659300	3	827.739	2481.2	0	0.62	63.66	5650	5650	MS2	31/84	31	84	AC3.RAW
High	C	2	AAGASWIQLDEPTLVLDLESHK	17962	Unambiguous	genomic_reference:SL2.31ch10 evidence_code:10F1H1E1IEG gene_region:61889662-61892937 functional_description:"5-methyltetrahydropteroyltriglutamate--homocysteine methyltransferase (AHRD V1 ***- B6UF55_MAIZE); contains Interpro domain(s) IPR006276 5-methyltetrahydropteroyltriglutamate--homocysteine S-methyltransferase "	1	1	Solyc10g081510.1.1		CID	1	0	1	1	0	1.2e-08	581	581	5.27	0	879.16	0	3	25	788400	3	798.417	2393.24	0	0.44	64.86	5747	5747	MS2	31/84	31	84	AC3.RAW
High	D	2	YGQDATNVGDEGGFAPNIQENK	7945	Unambiguous	genomic_reference:SL2.31ch09 evidence_code:10F1H1E1IEG gene_region:2371333-2375783 functional_description:"Enolase (AHRD V1 ***- C5J0G6_TOBAC); contains Interpro domain(s) IPR000941 Enolase "|genomic_reference:SL2.31ch10 evidence_code:10F1H1E1IEG gene_region:63994775-63999383 functional_description:"Enolase (AHRD V1 ***- C5J0G6_TOBAC); contains Interpro domain(s) IPR000941 Enolase "	2	2	Solyc09g009020.1.1;Solyc10g085550.1.1		CID	1	0	1	1	0	4.58e-06	385	324	3.66	0	1177.13	0	20	25	1383000	3	775.352	2324.04	0	-0.14	28.51	2630	2630	MS2	31/84	31	84	AH2.RAW
High	D	2	SGETEDTFIADLAVGLSTGQIK	19762	Unambiguous	genomic_reference:SL2.31ch09 evidence_code:10F1H1E1IEG gene_region:2371333-2375783 functional_description:"Enolase (AHRD V1 ***- C5J0G6_TOBAC); contains Interpro domain(s) IPR000941 Enolase "|genomic_reference:SL2.31ch10 evidence_code:10F1H1E1IEG gene_region:63994775-63999383 functional_description:"Enolase (AHRD V1 ***- C5J0G6_TOBAC); contains Interpro domain(s) IPR000941 Enolase "	2	2	Solyc09g009020.1.1;Solyc10g085550.1.1		CID	1	0	1	1	0	4.96e-07	633	659	4.3	0	993.29	0	2	25	823500	3	751.382	2252.13	0	0.46	73.87	6468	6468	MS2	31/84	31	84	AH2.RAW
High	F	2	VYLSADDLLLNLQDFNLDTTRK	19527	Unambiguous	genomic_reference:SL2.31ch10 evidence_code:10F1H1E1IEG gene_region:2276303-2278346 functional_description:"Prohibitin 1-like protein (AHRD V1 ***- Q9AXM0_BRANA); contains Interpro domain(s) IPR000163 Prohibitin "	1	1	Solyc10g008140.1.1		CID	1	0	1	1	0	4.82e-09	478	512	3.5	0	796.96	1	10	25	714000	3	856.451	2567.34	0	1.01	75.83	6775	6775	MS2	31/84	31	84	AH4.RAW
High	G	2	ILASVGAEADDDRIELLLSQVK	99635	Unambiguous	genomic_reference:SL2.31ch11 evidence_code:10F1H0E1IEG gene_region:49927545-49929100 functional_description:"60s acidic ribosomal protein-like protein (AHRD V1 ***- Q3HVP0_SOLTU); contains Interpro domain(s) IPR001813 Ribosomal protein 60S "	1	1	Solyc11g067100.1.1		CID	1	0	1	1	0	3.15e-16	329	289	3.32	0	883.83	1	29	25	680200	3	785.763	2355.28	0	-0.57	58.89	5329	5329	MS2	31/84	31	84	EAC2.RAW
High	H	2	VYLSADDLLLNLQDFNLDTTRK	19527	Unambiguous	genomic_reference:SL2.31ch10 evidence_code:10F1H1E1IEG gene_region:2276303-2278346 functional_description:"Prohibitin 1-like protein (AHRD V1 ***- Q9AXM0_BRANA); contains Interpro domain(s) IPR000163 Prohibitin "	1	1	Solyc10g008140.1.1		CID	1	0	1	1	0	0.000185	476	507	3.02	0	773.39	1	3	25	585900	3	856.45	2567.34	0	0.59	74.26	6661	6661	MS2	31/84	31	84	EAC3_150410225534.RAW
High	H	2	ELDALLSDESLATVPFLILGNK	21108	Unambiguous	genomic_reference:SL2.31ch01 evidence_code:10F1H1E1IEG gene_region:71122874-71128182 functional_description:"ADP-ribosylation factor-like protein 3 (AHRD V1 **-- ARL3_CAEEL); contains Interpro domain(s) IPR006687 GTP-binding protein SAR1 "	2	1	Solyc01g079540.1.1		CID	1	0	1	1	0	3.79e-05	347	348	3.11	0	886.69	0	17	25	218000	3	786.765	2358.28	0	-0.42	85.3	7540	7540	MS2	31/84	31	84	EAC3_150410225534.RAW
High	I	2	VGDESYESFSAEKEAILSSLAR	15616	Unambiguous	genomic_reference:SL2.31ch06 evidence_code:10F0H1E1IEG gene_region:36234655-36238685 functional_description:"Alanine aminotransferase (AHRD V1 **** Q6VEJ5_CAPAN); contains Interpro domain(s) IPR004839 Aminotransferase, class I and II "	1	1	Solyc06g063090.1.1		CID	1	0	1	1	0	4.2e-07	630	654	4.55	0	1740.08	1	25	25	339400	3	796.726	2388.16	0	2.26	55.8	5110	5110	MS2	31/84	31	84	EAC4_150411011441.RAW
High	I	2	VGLDVAEAQHLMDGLDWQGAVK	14358	Unambiguous	genomic_reference:SL2.31ch05 evidence_code:10F0H1E1IEG gene_region:55518326-55523602 functional_description:"Carboxymethylenebutenolidase-like protein (AHRD V1 ***- Q8LQS5_ORYSJ); contains Interpro domain(s) IPR002925 Dienelactone hydrolase "	1	1	Solyc05g043430.1.1		CID	1	0	1	1	0	1.98e-08	625	590	4.6	0	1529.56	0	18	25	206200	3	784.728	2352.17	0	1.29	63.11	5731	5731	MS2	31/84	31	84	EAC4_150411011441.RAW
High	I	2	VYLSADDLLLNLQDFNLDTTRK	19527	Unambiguous	genomic_reference:SL2.31ch10 evidence_code:10F1H1E1IEG gene_region:2276303-2278346 functional_description:"Prohibitin 1-like protein (AHRD V1 ***- Q9AXM0_BRANA); contains Interpro domain(s) IPR000163 Prohibitin "	1	1	Solyc10g008140.1.1		CID	1	0	1	1	0	1.41e-06	479	516	3.83	0	865.95	1	15	25	205900	3	856.45	2567.33	0	-0.27	71.63	6454	6454	MS2	31/84	31	84	EAC4_150411011441.RAW
High	K	2	AFKDLMAASWDELPDPVVYDAK	17662	Unambiguous	genomic_reference:SL2.31ch04 evidence_code:10F1H1E1IEG gene_region:61333457-61335633 functional_description:"Unknown Protein (AHRD V1)"	1	1	Solyc04g079180.1.1		CID	1	0	1	1	0	2.81e-07	658	710	4.38	0	697.48	1	9	25	505700	3	827.739	2481.2	0	0.1	63.99	5775	5775	MS2	31/84	31	84	EAH2.RAW
High	A	2	LTGmAFRVPTVDVSVVDLTAR	15163	Unambiguous	genomic_reference:SL2.31ch05 evidence_code:10F0H1E0IEG gene_region:648534-651184 functional_description:"Glyceraldehyde-3-phosphate dehydrogenase (AHRD V1 **** Q9XG67_TOBAC); contains Interpro domain(s) IPR000173 Glyceraldehyde 3-phosphate dehydrogenase "	1	1	Solyc05g005820.1.1	M4(Oxidation)	CID	1	0	1	1	0	5.17e-07	406	368	4.15	0	1373.1	1	43	25	608000	3	755.076	2263.21	0	1.12	54.57	4903	4903	MS2	31/80	31	80	AC1.RAW
High	B	2	ADRDESSPYAAmLAAQDVSQR	7260	Unambiguous	genomic_reference:SL2.31ch02 evidence_code:10F1H1E1IEG gene_region:34880949-34883668 functional_description:"30S ribosomal protein S11 (AHRD V1 ***- RS11_CAUSK); contains Interpro domain(s) IPR018102 Ribosomal S11, conserved site "|genomic_reference:SL2.31ch09 evidence_code:10F1H1E1IEG gene_region:3490217-3492478 functional_description:"30S ribosomal protein S11 (AHRD V1 ***- RS11_CAUSK); contain…	2	2	Solyc02g070570.1.1;Solyc09g010100.1.1	M12(Oxidation)	CID	1	0	1	1	0	2.9e-08	407	428	4.03	0	1220.78	1	15	25	1464000	3	766.354	2297.05	0	0.31	26.99	2557	2557	MS2	31/80	31	80	AC2.RAW
High	B	2	GDKYQAIDVTGPDGAPLDSGR	30411	Unambiguous	genomic_reference:SL2.31ch02 evidence_code:10F0H1E1IEG gene_region:41645495-41646277 functional_description:"Cold-shock DNA binding protein (AHRD V1 *-** C1N2P4_MICPS); contains Interpro domain(s) IPR002059 Cold-shock protein, DNA-binding "	1	1	Solyc02g083800.1.1		CID	1	0	1	1	0	4.81e-05	556	601	3.93	0	1188.54	1	17	25	437200	3	711.348	2132.03	0	2.28	29.79	2806	2806	MS2	31/80	31	80	AC2.RAW
High	B	2	IPSAVGYQPTLATDLGGLQER	13265	Unambiguous	genomic_reference:SL2.31ch02 evidence_code:10F0H1E0IEG gene_region:47123903-47126760 functional_description:"ATP synthase subunit beta (AHRD V1 ***- Q9ZR78_NICSY); contains Interpro domain(s) IPR005722 ATPase, F1 complex, beta subunit "|genomic_reference:SL2.31ch04 evidence_code:10F1H1E1IEG gene_region:1237570-1241219 functional_description:"ATP synthase subunit beta (AHRD V1 ***- O82722_NICSY); …	3	3	Solyc02g091130.1.1;Solyc04g007550.1.1;Solyc05g008460.1.1		CID	1	0	1	1	0	2.33e-08	506	514	4.95	0	1821.5	0	6	23	2565000	3	729.387	2186.15	0	0.91	47.12	4304	4304	MS2	31/80	31	80	AC2.RAW
High	C	2	LIADDSDFFANMVVEAVQAVK	21668	Unambiguous	genomic_reference:SL2.31ch01 evidence_code:10F1H1E1IEG gene_region:76163502-76172429 functional_description:"T-complex protein 1 subunit alpha (AHRD V1 ***- B9SF60_RICCO); contains Interpro domain(s) IPR012715 T-complex protein 1, alpha subunit "	1	1	Solyc01g090750.1.1		CID	1	0	1	1	0	3.06e-07	670	665	4.6	0	778.11	0	25	25	192100	3	761.385	2282.14	0	0.93	89.8	7629	7629	MS2	31/80	31	80	AC3.RAW
High	D	2	LTGMAFRVPTVDVSVVDLTAR	15163	Unambiguous	genomic_reference:SL2.31ch05 evidence_code:10F0H1E0IEG gene_region:648534-651184 functional_description:"Glyceraldehyde-3-phosphate dehydrogenase (AHRD V1 **** Q9XG67_TOBAC); contains Interpro domain(s) IPR000173 Glyceraldehyde 3-phosphate dehydrogenase "	1	1	Solyc05g005820.1.1		CID	1	0	1	1	0	1.2e-06	325	297	4.23	0	1774	1	16	25	1092000	3	749.745	2247.22	0	1.01	59.14	5252	5252	MS2	31/80	31	80	AH2.RAW
High	E	2	ALVVINPGNPTGQVLGEANQR	11666	Unambiguous	genomic_reference:SL2.31ch06 evidence_code:10F0H1E1IEG gene_region:36234655-36238685 functional_description:"Alanine aminotransferase (AHRD V1 **** Q6VEJ5_CAPAN); contains Interpro domain(s) IPR004839 Aminotransferase, class I and II "	1	1	Solyc06g063090.1.1		CID	1	0	1	1	0	0.00251	407	381	3.62	0	1171.14	0	9	25	1278000	3	716.391	2147.16	0	0.3	45.75	4168	4168	MS2	31/80	31	80	AH3.RAW
High	E	2	GLIEPISSSFVNLVNADFTAK	19815	Unambiguous	genomic_reference:SL2.31ch10 evidence_code:10F0H1E1IEG gene_region:42589802-42593372 functional_description:"Phosphoglycerate dehydrogenase (AHRD V1 **** D2D316_GOSHI); contains Interpro domain(s) IPR015508 D-3-phosphogylcerate Dehydrogenase "	1	1	Solyc10g049890.1.1		CID	1	0	1	1	0	0.000146	454	462	4.29	0	1430.42	0	3	25	231700	3	741.396	2222.17	0	1.1	80.24	7064	7064	MS2	31/80	31	80	AH3.RAW
High	J	2	LIADDSDFFANMVVEAVQAVK	21668	Unambiguous	genomic_reference:SL2.31ch01 evidence_code:10F1H1E1IEG gene_region:76163502-76172429 functional_description:"T-complex protein 1 subunit alpha (AHRD V1 ***- B9SF60_RICCO); contains Interpro domain(s) IPR012715 T-complex protein 1, alpha subunit "	1	1	Solyc01g090750.1.1		CID	1	0	1	1	0	0.00035	663	661	4.36	0	715.34	0	25	25	104300	3	761.385	2282.14	0	0.69	91.71	8208	8208	MS2	31/80	31	80	EAH1.RAW
High	K	2	LTGMAFRVPTVDVSVVDLTAR	15163	Unambiguous	genomic_reference:SL2.31ch05 evidence_code:10F0H1E0IEG gene_region:648534-651184 functional_description:"Glyceraldehyde-3-phosphate dehydrogenase (AHRD V1 **** Q9XG67_TOBAC); contains Interpro domain(s) IPR000173 Glyceraldehyde 3-phosphate dehydrogenase "	1	1	Solyc05g005820.1.1		CID	1	0	1	1	0	4.6e-07	326	299	4.55	0	1642.09	1	17	25	421800	3	749.744	2247.22	0	0.85	60.39	5469	5469	MS2	31/80	31	80	EAH2.RAW
High	K	2	SYDSTTHFESTVMDVLDmYSK	18412	Unambiguous	genomic_reference:SL2.31ch01 evidence_code:10F1H1E1IEG gene_region:85610405-85615953 functional_description:"Rab-GDP dissociation inhibitor (AHRD V1 **** A5CKE3_SOLLC); contains Interpro domain(s) IPR000806 Rab GDI protein "	1	1	Solyc01g105810.1.1	M18(Oxidation)	CID	1	0	1	1	0	2.71e-07	196	196	4.53	0	1556.13	0	22	25	487100	3	824.692	2472.06	0	1.1	67.31	6054	6054	MS2	31/80	31	80	EAH2.RAW
High	K	2	LIADDSDFFANMVVEAVQAVK	21668	Unambiguous	genomic_reference:SL2.31ch01 evidence_code:10F1H1E1IEG gene_region:76163502-76172429 functional_description:"T-complex protein 1 subunit alpha (AHRD V1 ***- B9SF60_RICCO); contains Interpro domain(s) IPR012715 T-complex protein 1, alpha subunit "	1	1	Solyc01g090750.1.1		CID	1	0	1	1	0	1.99e-07	663	681	4.56	0	716.02	0	20	25	152800	3	761.383	2282.13	0	-1.64	90.67	8013	8013	MS2	31/80	31	80	EAH2.RAW
High	A	2	VSQmIEDHEPFEGQALLDAK	10284	Unambiguous	genomic_reference:SL2.31ch06 evidence_code:10F1H1E1IEG gene_region:6258168-6260708 functional_description:"Elongation factor 1-gamma (AHRD V1 ***- B7SDI2_ORYSJ); contains Interpro domain(s) IPR001662 Translation elongation factor EF1B, gamma chain, conserved "	1	1	Solyc06g011280.1.1	M4(Oxidation)	CID	1	0	1	1	0	9.1e-09	585	622	4.75	0	1593.15	0	25	25	803800	3	758.364	2273.08	0	0.45	37.11	3423	3423	MS2	31/76	31	76	AC1.RAW
High	A	2	QmGLSDQDIVALSGAHTLGR	11135	Unambiguous	genomic_reference:SL2.31ch06 evidence_code:10F1H1E1IEG gene_region:182627-184940 functional_description:"Ascorbate peroxidase (AHRD V1 ***- Q9SMD3_SOLLC); contains Interpro domain(s) IPR019793 Peroxidases heam-ligand binding site IPR019794 Peroxidase, active site IPR002016 Haem peroxidase, plant/fungal/bacterial "	1	1	Solyc06g005160.1.1	M2(Oxidation)	CID	1	0	1	1	0	1.01e-08	637	604	3.38	0	930.94	0	17	18	1898000	3	695.685	2085.04	0	-0.22	40.12	3684	3684	MS2	31/76	31	76	AC1.RAW
High	A	2	LYMEARPmEEGLAEAIDEGR	9460	Unambiguous	genomic_reference:SL2.31ch08 evidence_code:10F0H1E1IEG gene_region:49546658-49549476 functional_description:"Elongation factor EF-2 (AHRD V1 **** Q9SGT4_ARATH); contains Interpro domain(s) IPR000795 Protein synthesis factor, GTP-binding "	2	1	Solyc08g062920.1.1	M8(Oxidation)	CID	0.0418	0	1	1	0	8.98e-07	475	505	3.59	0	1324.62	0	13	25	1158000	3	766.024	2296.06	0	-0.26	40.13	3685	3685	MS2	31/76	31	76	AC1.RAW
High	A	2	YSGALESFYEKFDPDFINIR	18537	Unambiguous	genomic_reference:SL2.31ch12 evidence_code:10F1H1E1IEG gene_region:47132509-47140184 functional_description:"V-type ATP synthase alpha chain (AHRD V1 ***- VATA_METTH); contains Interpro domain(s) IPR005725 ATPase, V1 complex, subunit A "	2	1	Solyc12g055800.1.1		CID	1	0	1	1	0	2.29e-08	707	685	4.23	0	1386.46	1	28	25	372400	3	804.39	2411.16	0	0.53	68.42	6049	6049	MS2	31/76	31	76	AC1.RAW
High	B	2	VELGDATTAADPSGEHVISR	6763	Unambiguous	genomic_reference:SL2.31ch12 evidence_code:10F1H1E1IEG gene_region:63232222-63238853 functional_description:"Diphosphate--fructose-6-phosphate 1-phosphotransferase (AHRD V1 ***- C8PT93_9SPIO); contains Interpro domain(s) IPR011183 Pyrophosphate-dependent phosphofructokinase PfpB "	1	1	Solyc12g095760.1.1		CID	1	0	1	1	0	6.05e-07	651	635	3.53	0	804.19	0	24	25	856600	3	675.668	2024.99	0	-0.09	25.13	2388	2388	MS2	31/76	31	76	AC2.RAW
High	B	2	VSQmIEDHEPFEGQALLDAK	10284	Unambiguous	genomic_reference:SL2.31ch06 evidence_code:10F1H1E1IEG gene_region:6258168-6260708 functional_description:"Elongation factor 1-gamma (AHRD V1 ***- B7SDI2_ORYSJ); contains Interpro domain(s) IPR001662 Translation elongation factor EF1B, gamma chain, conserved "	1	1	Solyc06g011280.1.1	M4(Oxidation)	CID	1	0	1	1	0	6.42e-06	586	617	4.71	0	1358.52	0	16	25	1243000	3	758.364	2273.08	0	1.17	37.07	3449	3449	MS2	31/76	31	76	AC2.RAW
High	B	2	YYILPDSLNLETLLVEETPR	20465	Unambiguous	genomic_reference:SL2.31ch06 evidence_code:10F1H1E1IEG gene_region:45774042-45776586 functional_description:"Small nuclear ribonucleoprotein Sm D1 (AHRD V1 ***- B6TXH2_MAIZE); contains Interpro domain(s) IPR006649 Like-Sm ribonucleoprotein, eukaryotic and archaea-type, core "	1	1	Solyc06g084310.1.1		CID	1	0	1	1	0	4.93e-06	475	490	4.62	0	1104.01	0	2	25	196200	3	793.421	2378.25	0	-0.46	76.76	6770	6770	MS2	31/76	31	76	AC2.RAW
High	C	2	DLIGPAMYFGLMGDGQPIGR	15282	Unambiguous	genomic_reference:SL2.31ch05 evidence_code:10F1H1E1IEG gene_region:5295300-5297348 functional_description:"Alpha-1 4-glucan-protein synthase (AHRD V1 **-* B9RLK7_RICCO); contains Interpro domain(s) IPR004901 Alpha-1,4-glucan-protein synthase, UDP-forming "|genomic_reference:SL2.31ch02 evidence_code:10F0H1E0IEG gene_region:45629552-45630857 functional_description:"Alpha-1 4-glucan-protein synthase…	3	3	Solyc05g012070.1.1;Solyc02g089170.1.1;Solyc03g070390.1.1		CID	1	0	1	1	0	8.09e-06	588	547	3.71	0	957.35	0	7	25	97820	3	703.348	2108.03	0	-0.98	70.66	6216	6216	MS2	31/76	31	76	AC3.RAW
High	D	2	VSQmIEDHEPFEGQALLDAK	10284	Unambiguous	genomic_reference:SL2.31ch06 evidence_code:10F1H1E1IEG gene_region:6258168-6260708 functional_description:"Elongation factor 1-gamma (AHRD V1 ***- B7SDI2_ORYSJ); contains Interpro domain(s) IPR001662 Translation elongation factor EF1B, gamma chain, conserved "	1	1	Solyc06g011280.1.1	M4(Oxidation)	CID	1	0	1	1	0	3.3e-08	587	615	5.56	0	1612.06	0	8	22	2026000	3	758.363	2273.08	0	-0.04	36.05	3304	3304	MS2	31/76	31	76	AH2.RAW
High	D	2	EAPAFVEQATEQQILVTGIK	14533	Unambiguous	genomic_reference:SL2.31ch04 evidence_code:10F1H1E1IEG gene_region:1237570-1241219 functional_description:"ATP synthase subunit beta (AHRD V1 ***- O82722_NICSY); contains Interpro domain(s) IPR005722 ATPase, F1 complex, beta subunit "|genomic_reference:SL2.31ch05 evidence_code:10F1H1E1IEG gene_region:2806055-2809657 functional_description:"ATP synthase subunit beta (AHRD V1 ***- O82722_NICSY); co…	2	2	Solyc04g007550.1.1;Solyc05g008460.1.1		CID	1	0	1	1	0	1.41e-07	474	456	4.77	0	1765.71	0	72	17	3740000	3	724.723	2172.15	0	-0.21	51.2	4594	4594	MS2	31/76	31	76	AH2.RAW
High	D	2	YSGALESFYEKFDPDFINIR	18537	Unambiguous	genomic_reference:SL2.31ch12 evidence_code:10F1H1E1IEG gene_region:47132509-47140184 functional_description:"V-type ATP synthase alpha chain (AHRD V1 ***- VATA_METTH); contains Interpro domain(s) IPR005725 ATPase, V1 complex, subunit A "	2	1	Solyc12g055800.1.1		CID	1	0	1	1	0	8.91e-09	714	683	4.73	0	1455.36	1	23	25	1096000	3	804.391	2411.16	0	0.84	67.52	5945	5945	MS2	31/76	31	76	AH2.RAW
High	E	2	YRVENLYEGPLDDAYANAIR	13960	Unambiguous	genomic_reference:SL2.31ch08 evidence_code:10F0H1E1IEG gene_region:49546658-49549476 functional_description:"Elongation factor EF-2 (AHRD V1 **** Q9SGT4_ARATH); contains Interpro domain(s) IPR000795 Protein synthesis factor, GTP-binding "	2	1	Solyc08g062920.1.1		CID	1	0	1	1	0	0.000273	633	624	4.63	0	1766.91	1	4	25	2071000	3	781.386	2342.14	0	1.08	54.29	4887	4887	MS2	31/76	31	76	AH3.RAW
High	E	2	VSPTYHLYSPSEVEDVISRL	82439	Unambiguous	genomic_reference:SL2.31ch08 evidence_code:10F0H1E1IEG gene_region:7616348-7622096 functional_description:"Proteasome subunit alpha type (AHRD V1 ***- C6SW82_SOYBN); contains Interpro domain(s) IPR001353 Proteasome, subunit alpha/beta "	1	1	Solyc08g016510.1.1		CID	1	0	1	1	0	0.00381	654	639	3.81	0	884.23	1	16	25	482400	3	764.39	2291.16	0	0.49	73.74	6509	6509	MS2	31/76	31	76	AH3.RAW
High	G	2	IGANEPSQLAINDNANGLAR	8316	Unambiguous	genomic_reference:SL2.31ch09 evidence_code:10F0H1E1IEG gene_region:2645029-2646904 functional_description:"Fructose-bisphosphate aldolase (AHRD V1 ***- Q2PYX3_SOLTU); contains Interpro domain(s) IPR000741 Fructose-bisphosphate aldolase, class-I "|genomic_reference:SL2.31ch10 evidence_code:10F1H1E1IEG gene_region:62683898-62686621 functional_description:"Fructose-bisphosphate aldolase (AHRD V1 ***…	2	2	Solyc09g009260.1.1;Solyc10g083570.1.1		CID	1	0	1	1	0	3.15e-16	596	600	3.44	0	1795.45	0	18	17	2727000	3	680.015	2038.03	0	0.23	28.19	2715	2715	MS2	31/76	31	76	EAC2.RAW
High	G	2	YHPEVDLDEVNALAQLMTWK	16841	Unambiguous	genomic_reference:SL2.31ch05 evidence_code:10F0H1E1IEG gene_region:61565704-61570805 functional_description:"Glutamate dehydrogenase (AHRD V1 **** Q94IA5_BRANA); contains Interpro domain(s) IPR014362 Glutamate dehydrogenase "	1	1	Solyc05g052100.1.1		CID	1	0	1	1	0	3.15e-16	635	682	3.13	0	1199.64	0	7	25	683400	3	791.391	2372.16	0	-0.41	74.48	6617	6617	MS2	31/76	31	76	EAC2.RAW
High	G	2	DELLETAGEVFANVASGVLR	125636	Unambiguous	genomic_reference:SL2.31ch06 evidence_code:10F0H1E1IEG gene_region:20384815-20392058 functional_description:"Alcohol dehydrogenase zinc-binding domain protein (AHRD V1 ***- A6X535_OCHA4); contains Interpro domain(s) IPR002085 Alcohol dehydrogenase superfamily, zinc-containing "	1	1	Solyc06g034120.1.1		CID	1	0	1	1	0	3.15e-16	632	604	3.47	0	1747.97	0	44	25	72970	3	697.365	2090.08	0	1.59	92.57	8100	8100	MS2	31/76	31	76	EAC2.RAW
High	G	2	FDDGLPPILTALEVLDNQIR	21890	Unambiguous	genomic_reference:SL2.31ch04 evidence_code:10F1H1E1IEG gene_region:1237570-1241219 functional_description:"ATP synthase subunit beta (AHRD V1 ***- O82722_NICSY); contains Interpro domain(s) IPR005722 ATPase, F1 complex, beta subunit "	1	1	Solyc04g007550.1.1		CID	1	0	1	1	0	3.15e-16	409	371	3.34	0	1117.32	0	3	25	803800	3	747.071	2239.2	0	0.63	96.49	8434	8434	MS2	31/76	31	76	EAC2.RAW
High	H	2	FIVEAANHPTDPDADEILSK	9984	Unambiguous	genomic_reference:SL2.31ch05 evidence_code:10F0H1E1IEG gene_region:61565704-61570805 functional_description:"Glutamate dehydrogenase (AHRD V1 **** Q94IA5_BRANA); contains Interpro domain(s) IPR014362 Glutamate dehydrogenase "	1	1	Solyc05g052100.1.1		CID	1	0	1	1	0	1.28e-05	613	613	3.08	0	680.58	0	18	15	3091000	3	728.027	2182.07	0	0.34	36.91	3484	3484	MS2	31/76	31	76	EAC3_150410225534.RAW
High	H	2	TAAYGHFGRDDPDFTWETVK	10668	Unambiguous	genomic_reference:SL2.31ch09 evidence_code:10F1H1E1IEG gene_region:1749910-1751082 functional_description:"S-adenosylmethionine synthase (AHRD V1 ***- B5LAW6_CAPAN); contains Interpro domain(s) IPR002133 S-adenosylmethionine synthetase "	1	1	Solyc09g008280.1.1		CID	1	0	1	1	0	0.000165	478	501	3.36	0	987.56	1	28	23	1665000	3	771.691	2313.06	0	0.76	39.3	3694	3694	MS2	31/76	31	76	EAC3_150410225534.RAW
High	I	2	VSQmIEDHEPFEGQALLDAK	10284	Unambiguous	genomic_reference:SL2.31ch06 evidence_code:10F1H1E1IEG gene_region:6258168-6260708 functional_description:"Elongation factor 1-gamma (AHRD V1 ***- B7SDI2_ORYSJ); contains Interpro domain(s) IPR001662 Translation elongation factor EF1B, gamma chain, conserved "	1	1	Solyc06g011280.1.1	M4(Oxidation)	CID	1	0	1	1	0	1.16e-08	567	599	5.55	0	1626.82	0	14	25	828400	3	758.363	2273.08	0	-0.2	38.75	3642	3642	MS2	31/76	31	76	EAC4_150411011441.RAW
High	I	2	YHPEVDLDEVNALAQLmTWK	16841	Unambiguous	genomic_reference:SL2.31ch05 evidence_code:10F0H1E1IEG gene_region:61565704-61570805 functional_description:"Glutamate dehydrogenase (AHRD V1 **** Q94IA5_BRANA); contains Interpro domain(s) IPR014362 Glutamate dehydrogenase "	1	1	Solyc05g052100.1.1	M17(Oxidation)	CID	1	0	1	1	0	5.9e-07	644	686	4.93	0	1434.11	0	12	25	582700	3	796.724	2388.16	0	1.39	60.51	5510	5510	MS2	31/76	31	76	EAC4_150411011441.RAW
High	I	2	YSGALESFYEKFDPDFINIR	18537	Unambiguous	genomic_reference:SL2.31ch12 evidence_code:10F1H1E1IEG gene_region:47132509-47140184 functional_description:"V-type ATP synthase alpha chain (AHRD V1 ***- VATA_METTH); contains Interpro domain(s) IPR005725 ATPase, V1 complex, subunit A "	2	1	Solyc12g055800.1.1		CID	1	0	1	1	0	5.57e-07	710	669	4.23	0	1464.39	1	15	25	470300	3	804.391	2411.16	0	1.14	67.51	6101	6101	MS2	31/76	31	76	EAC4_150411011441.RAW
High	K	2	LAEKIDQLNSAIDDISTQLR	15359	Unambiguous	genomic_reference:SL2.31ch04 evidence_code:10F1H1E1IEG gene_region:63846828-63849950 functional_description:"Unknown Protein (AHRD V1)"	1	1	Solyc04g082640.1.1		CID	1	0	1	1	0	3.66e-07	444	441	4.23	0	1710.6	1	19	25	1509000	3	748.402	2243.19	0	1.07	54.95	5011	5011	MS2	31/76	31	76	EAH2.RAW
High	L	2	APmIDNPDFKDDPDLYVFPK	13140	Unambiguous	genomic_reference:SL2.31ch01 evidence_code:10F0H1E1IEG gene_region:82189196-82192436 functional_description:"Calreticulin 2 calcium-binding protein (AHRD V1 **** A8HMC0_CHLRE); contains Interpro domain(s) IPR009169 Calreticulin "	1	1	Solyc01g100380.1.1	M3(Oxidation)	CID	1	0	1	1	0	3.19e-16	603	592	4.07	0	1478.02	1	26	25	228800	3	785.04	2353.11	0	0.21	49.26	4521	4521	MS2	31/76	31	76	EAH4.RAW
High	L	2	EAPAFVEQATEQQILVTGIK	14533	Unambiguous	genomic_reference:SL2.31ch04 evidence_code:10F1H1E1IEG gene_region:1237570-1241219 functional_description:"ATP synthase subunit beta (AHRD V1 ***- O82722_NICSY); contains Interpro domain(s) IPR005722 ATPase, F1 complex, beta subunit "|genomic_reference:SL2.31ch05 evidence_code:10F1H1E1IEG gene_region:2806055-2809657 functional_description:"ATP synthase subunit beta (AHRD V1 ***- O82722_NICSY); co…	2	2	Solyc04g007550.1.1;Solyc05g008460.1.1		CID	1	0	1	1	0	3.19e-16	466	420	3.38	0	1314.43	0	81	23	1531000	3	724.723	2172.16	0	0.38	54.46	4960	4960	MS2	31/76	31	76	EAH4.RAW
High	L	2	ELVANDQWLNTEFITTVQQR	16359	Unambiguous	genomic_reference:SL2.31ch01 evidence_code:10F1H1E1IEG gene_region:76111189-76113622 functional_description:"Malate dehydrogenase (AHRD V1 **** Q645N0_SOLLC); contains Interpro domain(s) IPR011274 Malate dehydrogenase, NAD-dependent, cytosolic "	1	1	Solyc01g090710.1.1		CID	1	0	1	1	0	3.19e-16	747	706	4.72	0	1365.26	0	18	25	2254000	3	802.409	2405.21	0	1.23	61.35	5551	5551	MS2	31/76	31	76	EAH4.RAW
High	B	2	DQDFIEATREPGITFLAAK	36091	Unambiguous	genomic_reference:SL2.31ch07 evidence_code:10F1H1E1IEG gene_region:57715151-57720088 functional_description:"Aspartic proteinase (AHRD V1 **-* Q96383_CENCA); contains Interpro domain(s) IPR001461 Peptidase A1 "	1	1	Solyc07g051850.1.1		CID	1	0	1	1	0	1.86e-05	598	604	3.73	0	1695.09	1	12	25	899700	3	708.032	2122.08	0	0.32	49.72	4523	4523	MS2	31/72	31	72	AC2.RAW
High	D	2	FGIVEGLMTTVHSITATQK	41201	Unambiguous	genomic_reference:SL2.31ch05 evidence_code:10F0H1E0IEG gene_region:648534-651184 functional_description:"Glyceraldehyde-3-phosphate dehydrogenase (AHRD V1 **** Q9XG67_TOBAC); contains Interpro domain(s) IPR000173 Glyceraldehyde 3-phosphate dehydrogenase "|genomic_reference:SL2.31ch06 evidence_code:10F0H1E1IEG gene_region:40700509-40704055 functional_description:"Glyceraldehyde-3-phosphate dehydro…	4	2	Solyc05g005820.1.1;Solyc06g071920.1.1		CID	1	0	1	1	0	8.51e-09	524	515	3.79	0	1403.77	0	19	25	420700	3	678.363	2033.08	0	0.79	70.39	6182	6182	MS2	31/72	31	72	AH2.RAW
High	E	2	FGIVEGLMTTVHSITATQK	41201	Unambiguous	genomic_reference:SL2.31ch05 evidence_code:10F0H1E0IEG gene_region:648534-651184 functional_description:"Glyceraldehyde-3-phosphate dehydrogenase (AHRD V1 **** Q9XG67_TOBAC); contains Interpro domain(s) IPR000173 Glyceraldehyde 3-phosphate dehydrogenase "|genomic_reference:SL2.31ch06 evidence_code:10F0H1E1IEG gene_region:40700509-40704055 functional_description:"Glyceraldehyde-3-phosphate dehydro…	4	2	Solyc05g005820.1.1;Solyc06g071920.1.1		CID	1	0	1	1	0	0.000134	516	509	3.7	0	1530.54	0	23	25	114600	3	678.363	2033.07	0	0.25	77.29	6809	6809	MS2	31/72	31	72	AH3.RAW
High	F	2	NFGLFRPDFSPVYDVGILR	122567	Unambiguous	genomic_reference:SL2.31ch06 evidence_code:10F0H1E1IEG gene_region:43694548-43696259 functional_description:"Glucan endo-1 3-beta-glucosidase (AHRD V1 ***- B6U1F1_MAIZE); contains Interpro domain(s) IPR013781 Glycoside hydrolase, subgroup, catalytic core "	1	1	Solyc06g076170.1.1		CID	1	0	1	1	0	9.69e-13	478	556	3.24	0	1317.35	0	10	25	98040	3	738.057	2212.16	0	1.05	73.22	6564	6564	MS2	31/72	31	72	AH4.RAW
High	J	2	EEIPELLKLDDVIDLVIPR	21316	Unambiguous	genomic_reference:SL2.31ch06 evidence_code:10F0H1E1IEG gene_region:14304374-14312974 functional_description:"Gamma-glutamyl phosphate reductase (AHRD V1 ***- D3TQ43_GLOMM); contains Interpro domain(s) IPR005766 Delta l-pyrroline-5-carboxylate synthetase "	2	1	Solyc06g019170.1.1		CID	1	0	1	1	0	6.17e-05	124	119	3.86	0	1666.51	1	4	25	956900	3	740.423	2219.26	0	0.91	88.61	7953	7953	MS2	31/72	31	72	EAH1.RAW
High	K	2	FGIVEGLMTTVHSITATQK	41201	Unambiguous	genomic_reference:SL2.31ch05 evidence_code:10F0H1E0IEG gene_region:648534-651184 functional_description:"Glyceraldehyde-3-phosphate dehydrogenase (AHRD V1 **** Q9XG67_TOBAC); contains Interpro domain(s) IPR000173 Glyceraldehyde 3-phosphate dehydrogenase "|genomic_reference:SL2.31ch06 evidence_code:10F0H1E1IEG gene_region:40700509-40704055 functional_description:"Glyceraldehyde-3-phosphate dehydro…	4	2	Solyc05g005820.1.1;Solyc06g071920.1.1		CID	1	0	1	1	0	5.06e-07	519	514	3.09	0	1194.81	0	20	25	277300	3	678.363	2033.07	0	0.61	71.35	6390	6390	MS2	31/72	31	72	EAH2.RAW
High	K	2	DAFPSLFSDVFDPFSPPIR	21133	Unambiguous	genomic_reference:SL2.31ch08 evidence_code:10F1H1E1IEG gene_region:59635405-59636272 functional_description:"Heat shock protein 22 (AHRD V1 ***- Q27JQ0_METAN); contains Interpro domain(s) IPR002068 Heat shock protein Hsp20 "	1	1	Solyc08g078700.1.1		CID	1	0	1	1	0	6.18e-07	648	664	4.27	0	1178.59	0	16	25	118900	3	718.69	2154.06	0	0.94	85.39	7541	7541	MS2	31/72	31	72	EAH2.RAW
High	A	2	mIQAVDDMLSHDIPELLK	17096	Unambiguous	genomic_reference:SL2.31ch11 evidence_code:10F0H1E1IEG gene_region:4963684-4968355 functional_description:"EH-domain-containing protein 1 (AHRD V1 **-* B6U193_MAIZE); contains Interpro domain(s) IPR001401 Dynamin, GTPase region "	1	1	Solyc11g012020.1.1	M1(Oxidation)	CID	1	0	1	1	0	2.93e-07	644	628	3.56	0	1180.28	0	33	25	290300	3	695.352	2084.04	0	0.86	62.25	5541	5541	MS2	31/68	31	68	AC1.RAW
High	D	2	mIQAVDDMLSHDIPELLK	17096	Unambiguous	genomic_reference:SL2.31ch11 evidence_code:10F0H1E1IEG gene_region:4963684-4968355 functional_description:"EH-domain-containing protein 1 (AHRD V1 **-* B6U193_MAIZE); contains Interpro domain(s) IPR001401 Dynamin, GTPase region "	1	1	Solyc11g012020.1.1	M1(Oxidation)	CID	1	0	1	1	0	1.57e-06	626	609	3.08	0	1114.81	0	21	25	356300	3	695.352	2084.04	0	0.6	61.04	5411	5411	MS2	31/68	31	68	AH2.RAW
High	D	2	DLFELLPQAIQEQLLLER	21200	Unambiguous	genomic_reference:SL2.31ch07 evidence_code:10F0H1E1IEG gene_region:56860793-56868027 functional_description:"Diphosphate-fructose-6-phosphate 1-phosphotransferase (AHRD V1 ***- D0TAW1_9BACE); contains Interpro domain(s) IPR011183 Pyrophosphate-dependent phosphofructokinase PfpB "	1	1	Solyc07g049280.1.1		CID	1	0	1	1	0	4.5e-07	225	236	3.44	0	1806.32	0	8	25	57100	3	723.404	2168.2	0	-0.05	85.74	7441	7441	MS2	31/68	31	68	AH2.RAW
High	E	2	HTDVLDAITQHLEIGSYR	38215	Unambiguous	genomic_reference:SL2.31ch07 evidence_code:10F1H1E1IEG gene_region:62455643-62461072 functional_description:"Phosphoenolpyruvate carboxylase 2 (AHRD V1 ***- Q9SCB2_SOLLC); contains Interpro domain(s) IPR015813 Pyruvate/Phosphoenolpyruvate kinase, catalytic core IPR001449 Phosphoenolpyruvate carboxylase "	3	1	Solyc07g062530.1.1		CID	1	0	1	1	0	0.000195	560	598	4.46	0	1662.94	0	28	25	409200	3	690.02	2068.05	0	0.36	62.92	5609	5609	MS2	31/68	31	68	AH3.RAW
High	G	2	mLNEDELRDAVLLVFANK	20286	Unambiguous	genomic_reference:SL2.31ch01 evidence_code:10F1H1E1IEG gene_region:82525477-82527862 functional_description:"ADP-ribosylation factor (AHRD V1 ***- D7KT27_ARALY); contains Interpro domain(s) IPR006688 ADP-ribosylation factor "	4	1	Solyc01g100860.1.1	M1(Oxidation)	CID	1	0	1	1	0	3.15e-16	562	596	4.14	0	1959.13	1	10	25	549300	3	702.702	2106.09	0	0.6	71.33	6357	6357	MS2	31/68	31	68	EAC2.RAW
High	K	2	YAADEDAFFADYAEAHLK	14432	Unambiguous	genomic_reference:SL2.31ch06 evidence_code:10F1H1E1IEG gene_region:182627-184940 functional_description:"Ascorbate peroxidase (AHRD V1 ***- Q9SMD3_SOLLC); contains Interpro domain(s) IPR019793 Peroxidases heam-ligand binding site IPR019794 Peroxidase, active site IPR002016 Haem peroxidase, plant/fungal/bacterial "	2	1	Solyc06g005160.1.1		CID	1	0	1	1	0	8.33e-08	326	297	3.8	0	632.16	0	17	25	1138000	3	682.975	2046.91	0	1.05	51.07	4681	4681	MS2	31/68	31	68	EAH2.RAW
High	B	2	IIDAIHSGELLNANYTK	10203	Unambiguous	genomic_reference:SL2.31ch12 evidence_code:10F0H1E1IEG gene_region:62058939-62062897 functional_description:"Phosphoenolpyruvate carboxykinase (AHRD V1 ***- Q8W505_SOLLC); contains Interpro domain(s) IPR001272 Phosphoenolpyruvate carboxykinase, ATP-utilising "	1	1	Solyc12g088160.1.1		CID	1	0	1	1	0	3.31e-06	511	469	3.04	0	1320.97	0	14	25	544100	3	624.667	1871.99	0	0.3	36.64	3412	3412	MS2	31/64	31	64	AC2.RAW
High	B	2	IEDLSSQLQTQAAQQFR	11512	Unambiguous	genomic_reference:SL2.31ch03 evidence_code:10F0H1E1IEG gene_region:45599230-45600851 functional_description:"Nascent polypeptide-associated complex alpha subunit-like protein (AHRD V1 ***- B6SU89_MAIZE); contains Interpro domain(s) IPR016641 Nascent polypeptide-associated complex, alpha subunit "	1	1	Solyc03g080160.1.1		CID	1	0	1	1	0	1.91e-07	649	666	3.86	0	1993.2	0	15	25	530900	3	655.001	1962.99	0	0.46	40.96	3784	3784	MS2	31/64	31	64	AC2.RAW
High	E	2	VKDELVLDGNDIELVSR	12186	Unambiguous	genomic_reference:SL2.31ch12 evidence_code:10F1H1E1IEG gene_region:63856222-63858136 functional_description:"Ribosomal L9-like protein (AHRD V1 ***- B3TLR1_ELAGV); contains Interpro domain(s) IPR002359 Ribosomal protein L6, conserved site-2 "	3	1	Solyc12g096700.1.1		CID	1	0	1	1	0	0.000572	442	464	4.1	0	1588.61	1	21	25	1132000	3	638.678	1914.02	0	0.46	47.71	4334	4334	MS2	31/64	31	64	AH3.RAW
High	F	2	IIDAIHSGELLNANYTK	10203	Unambiguous	genomic_reference:SL2.31ch12 evidence_code:10F0H1E1IEG gene_region:62058939-62062897 functional_description:"Phosphoenolpyruvate carboxykinase (AHRD V1 ***- Q8W505_SOLLC); contains Interpro domain(s) IPR001272 Phosphoenolpyruvate carboxykinase, ATP-utilising "	1	1	Solyc12g088160.1.1		CID	1	0	1	1	0	3.43e-14	513	469	3.12	0	1547.85	0	15	25	958400	3	624.667	1871.99	0	0.21	38.87	3667	3667	MS2	31/64	31	64	AH4.RAW
High	G	2	LAEQAERYEEMVEFMEK	10956	Unambiguous	genomic_reference:SL2.31ch03 evidence_code:10F0H1E1IEG gene_region:10154636-10156449 functional_description:"14-3-3 protein beta/alpha-1 (AHRD V1 **-- 143B1_DANRE); contains Interpro domain(s) IPR000308 14-3-3 protein "|genomic_reference:SL2.31ch04 evidence_code:10F1H1E1IEG gene_region:4428755-4429971 functional_description:"14-3-3 protein beta/alpha-1 (AHRD V1 **-- 143B1_ONCMY); contains Interpr…	4	4	Solyc03g034180.1.1;Solyc04g012120.1.1;Solyc04g074510.1.1;Solyc11g010200.1.1		CID	1	0	1	1	0	3.15e-16	336	367	3.87	0	2054.74	1	19	17	1446000	3	711.326	2131.96	0	-1.27	49.81	4576	4576	MS2	31/64	31	64	EAC2.RAW
High	H	2	DKIESDEQFNQAAETAK	4527	Unambiguous	genomic_reference:SL2.31ch07 evidence_code:10F0H1E1IEG gene_region:56860793-56868027 functional_description:"Diphosphate-fructose-6-phosphate 1-phosphotransferase (AHRD V1 ***- D0TAW1_9BACE); contains Interpro domain(s) IPR011183 Pyrophosphate-dependent phosphofructokinase PfpB "	1	1	Solyc07g049280.1.1		CID	1	0	1	1	0	9.89e-06	491	447	4.15	0	2271.34	1	2	25	1436000	3	641.969	1923.89	0	-0.17	18.92	1830	1830	MS2	31/64	31	64	EAC3_150410225534.RAW
High	I	2	VKDELVLDGNDIELVSR	12186	Unambiguous	genomic_reference:SL2.31ch12 evidence_code:10F1H1E1IEG gene_region:63856222-63858136 functional_description:"Ribosomal L9-like protein (AHRD V1 ***- B3TLR1_ELAGV); contains Interpro domain(s) IPR002359 Ribosomal protein L6, conserved site-2 "	3	1	Solyc12g096700.1.1		CID	1	0	1	1	0	3.91e-07	429	449	4.41	0	1455.23	1	8	25	1315000	3	638.678	1914.02	0	0.08	44.48	4142	4142	MS2	31/64	31	64	EAC4_150411011441.RAW
High	K	2	NIIHGSDGPETAKDEIK	3877	Unambiguous	genomic_reference:SL2.31ch08 evidence_code:10F1H1E1IEG gene_region:2767026-2769146 functional_description:"Nucleoside diphosphate kinase (AHRD V1 ***- D5ILC3_SOLTU); contains Interpro domain(s) IPR001564 Nucleoside diphosphate kinase, core "	2	1	Solyc08g008340.1.1		CID	1	0	1	1	0	6.72e-07	642	667	3.94	0	1066.25	1	64	25	1372000	3	608.643	1823.91	0	0.54	15.9	1556	1556	MS2	31/64	31	64	EAH2.RAW
High	K	2	DKIESDEQFNQAAETAK	4527	Unambiguous	genomic_reference:SL2.31ch07 evidence_code:10F0H1E1IEG gene_region:56860793-56868027 functional_description:"Diphosphate-fructose-6-phosphate 1-phosphotransferase (AHRD V1 ***- D0TAW1_9BACE); contains Interpro domain(s) IPR011183 Pyrophosphate-dependent phosphofructokinase PfpB "	1	1	Solyc07g049280.1.1		CID	1	0	1	1	0	9.28e-07	510	462	4.07	0	1936.3	1	0	25	1238000	3	641.969	1923.89	0	0.11	17.95	1751	1751	MS2	31/64	31	64	EAH2.RAW
High	L	2	DRYIPDDAMIEGSHGLR	7045	Unambiguous	genomic_reference:SL2.31ch10 evidence_code:10F0H1E0IEG gene_region:64082694-64085929 functional_description:"Beta-fructofuranosidase insoluble isoenzyme 2 (AHRD V1 **-* B6U1H5_MAIZE); contains Interpro domain(s) IPR001362 Glycoside hydrolase, family 32 "	1	1	Solyc10g085640.1.1		CID	1	0	1	1	0	3.19e-16	539	546	4.63	0	1689.18	1	38	25	256000	3	648.979	1944.92	0	0.21	33.31	3139	3139	MS2	31/64	31	64	EAH4.RAW
High	G	2	YPIEHGIVSNWDDmEK	9134	Unambiguous	genomic_reference:SL2.31ch03 evidence_code:10F1H1E1IEG gene_region:44382119-44383552 functional_description:"Actin (AHRD V1 ***- Q7XZJ2_GOSHI); contains Interpro domain(s) IPR004000 Actin/actin-like "|genomic_reference:SL2.31ch10 evidence_code:10F1H1E1IEG gene_region:61080001-61081737 functional_description:"Actin (AHRD V1 ***- B5M4V6_TOBAC); contains Interpro domain(s) IPR004000 Actin/actin-like…	8	4	Solyc03g078400.1.1;Solyc01g104770.1.1;Solyc06g076090.1.1;Solyc11g065990.1.1	M14(Oxidation)	CID	1	0	1	1	0	3.15e-16	305	301	4.23	0	1872.32	0	24	16	1778000	3	650.297	1948.88	0	0.92	30.16	2891	2891	MS2	31/60	31	60	EAC2.RAW
High	G	2	DDLRLPTDENLLSLIK	17279	Unambiguous	genomic_reference:SL2.31ch04 evidence_code:10F1H1E1IEG gene_region:342655-344857 functional_description:"Eukaryotic translation initiation factor 5A (AHRD V1 **** D6N3G5_GOSHI); contains Interpro domain(s) IPR001884 Translation elongation factor, IF5A "	3	1	Solyc04g005510.1.1		CID	1	0	1	1	0	3.15e-16	332	344	4.08	0	1616.27	1	7	25	1056000	3	619.011	1855.02	0	0.45	61.42	5539	5539	MS2	31/60	31	60	EAC2.RAW
High	H	2	DDLRLPTDENLLSLIK	17279	Unambiguous	genomic_reference:SL2.31ch04 evidence_code:10F1H1E1IEG gene_region:342655-344857 functional_description:"Eukaryotic translation initiation factor 5A (AHRD V1 **** D6N3G5_GOSHI); contains Interpro domain(s) IPR001884 Translation elongation factor, IF5A "	3	1	Solyc04g005510.1.1		CID	1	0	1	1	0	1.26e-05	346	358	3.55	0	1600.17	1	15	25	619800	3	619.011	1855.02	0	0.15	66.96	6056	6056	MS2	31/60	31	60	EAC3_150410225534.RAW
High	A	2	LGDDEFGHMLAGILK	7862	Unambiguous	genomic_reference:SL2.31ch06 evidence_code:10F1H1E1IEG gene_region:41485353-41487653 functional_description:"Fructokinase-like (AHRD V1 **-* Q307Z3_SOLTU); contains Interpro domain(s) IPR002173 Carbohydrate/puine kinase, PfkB, conserved site "	1	1	Solyc06g073190.1.1		CID	1	0	1	1	0	2.83e-07	579	613	4.57	0	856.59	0	7	25	687800	3	539.277	1615.82	0	0.2	64.34	5716	5716	MS2	31/56	31	56	AC1.RAW
High	B	2	LGDDEFGHmLAGILK	7862	Unambiguous	genomic_reference:SL2.31ch06 evidence_code:10F1H1E1IEG gene_region:41485353-41487653 functional_description:"Fructokinase-like (AHRD V1 **-* Q307Z3_SOLTU); contains Interpro domain(s) IPR002173 Carbohydrate/puine kinase, PfkB, conserved site "	1	1	Solyc06g073190.1.1	M9(Oxidation)	CID	1	0	1	1	0	7.09e-08	545	573	4.3	0	1137.42	0	4	25	1437000	3	544.609	1631.81	0	0.81	47.6	4345	4345	MS2	31/56	31	56	AC2.RAW
High	G	2	LGDDEFGHMLAGILK	7862	Unambiguous	genomic_reference:SL2.31ch06 evidence_code:10F1H1E1IEG gene_region:41485353-41487653 functional_description:"Fructokinase-like (AHRD V1 **-* Q307Z3_SOLTU); contains Interpro domain(s) IPR002173 Carbohydrate/puine kinase, PfkB, conserved site "	1	1	Solyc06g073190.1.1		CID	1	0	1	1	0	3.15e-16	562	594	3.44	0	918.74	0	9	25	1278000	3	539.276	1615.81	0	-0.82	62.12	5599	5599	MS2	31/56	31	56	EAC2.RAW
High	L	2	LGDDEFGHMLAGILK	7862	Unambiguous	genomic_reference:SL2.31ch06 evidence_code:10F1H1E1IEG gene_region:41485353-41487653 functional_description:"Fructokinase-like (AHRD V1 **-* Q307Z3_SOLTU); contains Interpro domain(s) IPR002173 Carbohydrate/puine kinase, PfkB, conserved site "	1	1	Solyc06g073190.1.1		CID	1	0	1	1	0	3.19e-16	536	578	3.48	0	930.96	0	10	25	326800	3	539.276	1615.81	0	-1.04	66.78	6012	6012	MS2	31/56	31	56	EAH4.RAW
High	A	2	HLVQWPIEELETLR	17159	Unambiguous	genomic_reference:SL2.31ch10 evidence_code:10F0H1E0IEG gene_region:64082694-64085929 functional_description:"Beta-fructofuranosidase insoluble isoenzyme 2 (AHRD V1 **-* B6U1H5_MAIZE); contains Interpro domain(s) IPR001362 Glycoside hydrolase, family 32 "	1	1	Solyc10g085640.1.1		CID	1	0	1	1	0	6.39e-09	476	492	5.06	0	3129.22	0	10	25	1002000	3	588.321	1762.95	0	-1.01	63.62	5657	5657	MS2	31/52	31	52	AC1.RAW
High	C	2	NVDSSDYSPLEQSGNGVYLVNLSPGSmmAPHVNPSAIEYGVVLK	16577	Unambiguous	genomic_reference:SL2.31ch06 evidence_code:10F0H1E0IEG gene_region:43098487-43100345 functional_description:"Vicilin (Fragment) (AHRD V1 *--- Q41726_ZAMFU); contains Interpro domain(s) IPR011051 Cupin, RmlC-type "	1	1	Solyc06g075260.1.1	M27(Oxidation); M28(Oxidation)	CID	1	0	1	1	0	6.52e-08	623	629	4.15	0	549.21	0	0	25	365300	3	1556.42	4667.23	0	1.29	59.23	5288	5288	MS2	31/172	31	172	AC3.RAW
High	G	2	NVDSSDYSPLEQSGNGVYLVNLSPGSmmAPHVNPSAIEYGVVLK	16577	Unambiguous	genomic_reference:SL2.31ch06 evidence_code:10F0H1E0IEG gene_region:43098487-43100345 functional_description:"Vicilin (Fragment) (AHRD V1 *--- Q41726_ZAMFU); contains Interpro domain(s) IPR011051 Cupin, RmlC-type "	1	1	Solyc06g075260.1.1	M27(Oxidation); M28(Oxidation)	CID	1	0	1	1	0	2.15e-15	596	621	4.67	0	493.82	0	2	25	441600	3	1556.42	4667.24	0	1.92	58.98	5337	5337	MS2	31/172	31	172	EAC2.RAW
High	K	2	NVDSSDYSPLEQSGNGVYLVNLSPGSmmAPHVNPSAIEYGVVLK	16577	Unambiguous	genomic_reference:SL2.31ch06 evidence_code:10F0H1E0IEG gene_region:43098487-43100345 functional_description:"Vicilin (Fragment) (AHRD V1 *--- Q41726_ZAMFU); contains Interpro domain(s) IPR011051 Cupin, RmlC-type "	1	1	Solyc06g075260.1.1	M27(Oxidation); M28(Oxidation)	CID	1	0	1	1	0	7.54e-09	613	634	3.6	0	613.92	0	0	25	770400	3	1556.41	4667.23	0	0.04	60.04	5440	5440	MS2	31/172	31	172	EAH2.RAW
High	G	2	QAFDEAIAELDTLGEESYKDSTLImQLLR	21966	Unambiguous	genomic_reference:SL2.31ch04 evidence_code:10F1H1E1IEG gene_region:4428755-4429971 functional_description:"14-3-3 protein beta/alpha-1 (AHRD V1 **-- 143B1_ONCMY); contains Interpro domain(s) IPR000308 14-3-3 protein "|genomic_reference:SL2.31ch04 evidence_code:10F0H1E1IEG gene_region:58093381-58094998 functional_description:"14-3-3 protein beta/alpha-B (AHRD V1 **-- 143BB_XENLA); contains Interpr…	4	4	Solyc04g012120.1.1;Solyc04g074510.1.1;Solyc11g010200.1.1;Solyc12g057110.1.1	M25(Oxidation)	CID	1	0	1	1	0	3.15e-16	699	658	4.6	0	294.15	1	7	25	207300	4	829.663	3315.63	0	0.38	95.9	8387	8387	MS2	31/168	31	168	EAC2.RAW
High	G	2	FRTDLPTGGLANVASTFMNLHGYEAPSDYEPTLIEVVDN	20651	Unambiguous	genomic_reference:SL2.31ch07 evidence_code:10F1H1E1IEG gene_region:55219265-55224407 functional_description:"2 3-bisphosphoglycerate-independent phosphoglycerate mutase (AHRD V1 **** B9S1V6_RICCO); contains Interpro domain(s) IPR005995 Phosphoglycerate mutase, 2,3-bisphosphoglycerate-independent "	1	1	Solyc07g044840.1.1		CID	1	0	1	1	0.000239	0.00181	628	596	3.29	0	374.61	1	2	25	319500	3	1418.68	4254.03	0	-0.28	79.45	7025	7025	MS2	31/152	31	152	EAC2.RAW
High	G	2	VGDGFTEGVEQGPLINEAAVQKVEYFVDEATSK	42128	Unambiguous	genomic_reference:SL2.31ch09 evidence_code:10F1H1E1IEG gene_region:65491459-65493027 functional_description:"Succinate semialdehyde dehydrogenase (AHRD V1 **** B6TPI6_MAIZE); contains Interpro domain(s) IPR015590 Aldehyde dehydrogenase "	1	1	Solyc09g090700.1.1		CID	1	0	1	1	0	3.15e-16	613	659	5.46	0	617.1	1	3	25	375900	3	1176.25	3526.73	0	1.47	76.39	6775	6775	MS2	31/128	31	128	EAC2.RAW
High	A	2	MANDSVGPEVENLVAGLPEGGVVLLENVR	20218	Unambiguous	genomic_reference:SL2.31ch07 evidence_code:10F1H1E1IEG gene_region:65212571-65215004 functional_description:"Phosphoglycerate kinase (AHRD V1 ***- Q2VCK2_SOLTU); contains Interpro domain(s) IPR001576 Phosphoglycerate kinase "	1	1	Solyc07g066600.1.1		CID	1	0	1	1	0	5.22e-07	542	562	4.46	0	980.51	0	2	25	1851000	3	993.182	2977.53	0	0.22	79.28	6938	6938	MS2	31/112	31	112	AC1.RAW
High	B	2	YILENFTGDSLDGIKEQEVGEFDPPSEVR	16000	Unambiguous	genomic_reference:SL2.31ch04 evidence_code:10F1H1E1IEG gene_region:59591250-59595247 functional_description:"Xylulose kinase (AHRD V1 ***- D7MPD2_ARALY); contains Interpro domain(s) IPR000577 Carbohydrate kinase, FGGY "	1	1	Solyc04g077040.1.1		CID	1	0	1	1	0	0.000111	671	735	3.51	0	692.09	1	0	25	604300	3	1095.19	3283.56	0	-0.51	56.69	5106	5106	MS2	31/112	31	112	AC2.RAW
High	C	2	VSDVELEFLTGSNKIDDESAmSLWHPNLK	16510	Unambiguous	genomic_reference:SL2.31ch06 evidence_code:10F1H1E1IEG gene_region:41485353-41487653 functional_description:"Fructokinase-like (AHRD V1 **-* Q307Z3_SOLTU); contains Interpro domain(s) IPR002173 Carbohydrate/puine kinase, PfkB, conserved site "	1	1	Solyc06g073190.1.1	M21(Oxidation)	CID	1	0	1	1	0	1.97e-05	707	698	4.26	0	824.49	1	4	25	1003000	3	1097.53	3290.59	0	-0.44	58.99	5268	5268	MS2	31/112	31	112	AC3.RAW
High	F	2	YGQDATNVGDEGGFAPNIQENKEGLELLK	12881	Unambiguous	genomic_reference:SL2.31ch09 evidence_code:10F1H1E1IEG gene_region:2371333-2375783 functional_description:"Enolase (AHRD V1 ***- C5J0G6_TOBAC); contains Interpro domain(s) IPR000941 Enolase "|genomic_reference:SL2.31ch10 evidence_code:10F1H1E1IEG gene_region:63994775-63999383 functional_description:"Enolase (AHRD V1 ***- C5J0G6_TOBAC); contains Interpro domain(s) IPR000941 Enolase "	2	2	Solyc09g009020.1.1;Solyc10g085550.1.1		CID	1	0	1	1	0	2.14e-09	665	717	3.8	0	768.41	1	5	25	1588000	3	1036.17	3106.5	0	0.29	49.03	4549	4549	MS2	31/112	31	112	AH4.RAW
High	J	2	MANDSVGPEVENLVAGLPEGGVVLLENVR	20218	Unambiguous	genomic_reference:SL2.31ch07 evidence_code:10F1H1E1IEG gene_region:65212571-65215004 functional_description:"Phosphoglycerate kinase (AHRD V1 ***- Q2VCK2_SOLTU); contains Interpro domain(s) IPR001576 Phosphoglycerate kinase "	1	1	Solyc07g066600.1.1		CID	1	0	1	1	0	0.000659	545	560	3.69	0	851.58	0	0	25	2016000	3	993.182	2977.53	0	0.03	80.52	7284	7284	MS2	31/112	31	112	EAH1.RAW
High	K	2	YGQDATNVGDEGGFAPNIQENKEGLELLK	12881	Unambiguous	genomic_reference:SL2.31ch09 evidence_code:10F1H1E1IEG gene_region:2371333-2375783 functional_description:"Enolase (AHRD V1 ***- C5J0G6_TOBAC); contains Interpro domain(s) IPR000941 Enolase "|genomic_reference:SL2.31ch10 evidence_code:10F1H1E1IEG gene_region:63994775-63999383 functional_description:"Enolase (AHRD V1 ***- C5J0G6_TOBAC); contains Interpro domain(s) IPR000941 Enolase "	2	2	Solyc09g009020.1.1;Solyc10g085550.1.1		CID	1	0	1	1	0	9.13e-10	666	719	4.35	0	730.29	1	6	25	1545000	3	1036.17	3106.5	0	1.23	46.14	4263	4263	MS2	31/112	31	112	EAH2.RAW
High	K	2	VSDVELEFLTGSNKIDDESAmSLWHPNLK	16510	Unambiguous	genomic_reference:SL2.31ch06 evidence_code:10F1H1E1IEG gene_region:41485353-41487653 functional_description:"Fructokinase-like (AHRD V1 **-* Q307Z3_SOLTU); contains Interpro domain(s) IPR002173 Carbohydrate/puine kinase, PfkB, conserved site "	1	1	Solyc06g073190.1.1	M21(Oxidation)	CID	1	0	1	1	0	9.08e-07	712	690	4.52	0	806.83	1	0	25	912300	3	1097.54	3290.59	0	0.89	59.22	5370	5370	MS2	31/112	31	112	EAH2.RAW
High	A	2	LTDGTVFDSSYERNDPIEFELGSGQVIK	15353	Unambiguous	genomic_reference:SL2.31ch09 evidence_code:10F1H0E1IEG gene_region:45727592-45731649 functional_description:"FK506-binding protein 2 (EC 5.2.1.8)(Peptidyl-prolyl cis-trans isomerase)(PPIase)(Rotamase) (AHRD V1 **-* C8VE36_EMENI); contains Interpro domain(s) IPR001179 Peptidyl-prolyl cis-trans isomerase, FKBP-type "	1	1	Solyc09g057670.1.1		CID	1	0	1	1	0	4.74e-05	744	722	4.14	0	900.6	1	0	25	579900	3	1039.51	3116.5	0	-1.07	55.21	4955	4955	MS2	31/108	31	108	AC1.RAW
High	C	2	YAAISQDNGLVPIVEPEILLDGDHPIER	17490	Unambiguous	genomic_reference:SL2.31ch05 evidence_code:10F1H1E1IEG gene_region:2917196-2920087 functional_description:"Fructose-bisphosphate aldolase (AHRD V1 ***- B9SJY9_RICCO); contains Interpro domain(s) IPR000741 Fructose-bisphosphate aldolase, class-I "	1	1	Solyc05g008600.1.1		CID	1	0	1	1	0	2.67e-07	498	484	3.22	0	483.07	0	6	25	409400	3	1025.2	3073.58	0	-0.24	62.91	5590	5590	MS2	31/108	31	108	AC3.RAW
High	I	2	LTDGTVFDSSYERNDPIEFELGSGQVIK	15353	Unambiguous	genomic_reference:SL2.31ch09 evidence_code:10F1H0E1IEG gene_region:45727592-45731649 functional_description:"FK506-binding protein 2 (EC 5.2.1.8)(Peptidyl-prolyl cis-trans isomerase)(PPIase)(Rotamase) (AHRD V1 **-* C8VE36_EMENI); contains Interpro domain(s) IPR001179 Peptidyl-prolyl cis-trans isomerase, FKBP-type "	1	1	Solyc09g057670.1.1		CID	1	0	1	1	0	1.2e-05	751	721	3.69	0	1146.71	1	18	25	371200	3	1039.51	3116.5	0	-0.84	55	5042	5042	MS2	31/108	31	108	EAC4_150411011441.RAW
High	J	2	YAAISQDNGLVPIVEPEILLDGDHPIER	17490	Unambiguous	genomic_reference:SL2.31ch05 evidence_code:10F1H1E1IEG gene_region:2917196-2920087 functional_description:"Fructose-bisphosphate aldolase (AHRD V1 ***- B9SJY9_RICCO); contains Interpro domain(s) IPR000741 Fructose-bisphosphate aldolase, class-I "	1	1	Solyc05g008600.1.1		CID	1	0	1	1	0	0.0038	500	470	4	0	591.56	0	1	25	2463000	3	1025.2	3073.59	0	1.19	64.71	5971	5971	MS2	31/108	31	108	EAH1.RAW
High	F	2	VDKGTVELPGTDGETTTQGLDGLAER	10517	Unambiguous	genomic_reference:SL2.31ch09 evidence_code:10F0H1E1IEG gene_region:2645029-2646904 functional_description:"Fructose-bisphosphate aldolase (AHRD V1 ***- Q2PYX3_SOLTU); contains Interpro domain(s) IPR000741 Fructose-bisphosphate aldolase, class-I "	1	1	Solyc09g009260.1.1		CID	1	0	1	1	0	3.48e-05	638	628	4.19	0	791.93	1	4	25	1557000	3	887.106	2659.3	0	-0.47	40.17	3784	3784	MS2	31/100	31	100	AH4.RAW
High	H	2	VDKGTVELPGTDGETTTQGLDGLAER	10517	Unambiguous	genomic_reference:SL2.31ch09 evidence_code:10F0H1E1IEG gene_region:2645029-2646904 functional_description:"Fructose-bisphosphate aldolase (AHRD V1 ***- Q2PYX3_SOLTU); contains Interpro domain(s) IPR000741 Fructose-bisphosphate aldolase, class-I "	1	1	Solyc09g009260.1.1		CID	1	0	1	1	0	3.57e-06	631	629	4.26	0	928.75	1	11	25	1959000	3	887.108	2659.31	0	1.39	38.41	3616	3616	MS2	31/100	31	100	EAC3_150410225534.RAW
High	J	2	VDKGTVELPGTNGETTTQGLDGLAER	10312	Unambiguous	genomic_reference:SL2.31ch10 evidence_code:10F1H1E1IEG gene_region:62683898-62686621 functional_description:"Fructose-bisphosphate aldolase (AHRD V1 ***- Q308A5_SOLTU); contains Interpro domain(s) IPR000741 Fructose-bisphosphate aldolase, class-I "	1	1	Solyc10g083570.1.1		CID	1	0	1	1	0	8.49e-05	677	630	5.36	0	892.11	1	6	25	2521000	3	886.779	2658.32	0	-0.19	38.74	3724	3724	MS2	31/100	31	100	EAH1.RAW
High	J	2	IQTPTDDVVVPYDKLAPLSEDPAETK	12847	Unambiguous	genomic_reference:SL2.31ch05 evidence_code:10F0H1E1IEG gene_region:63182582-63189858 functional_description:"UTP-glucose 1 phosphate uridylyltransferase (AHRD V1 **** B3VDY8_EUCGR); contains Interpro domain(s) IPR016267 UTP--glucose-1-phosphate uridylyltransferase, subgroup "	1	1	Solyc05g054060.1.1		CID	1	0	1	1	0	0.000408	593	588	3.83	0	690.06	1	0	25	3175000	3	947.819	2841.44	0	0.32	47.52	4497	4497	MS2	31/100	31	100	EAH1.RAW
High	K	2	VDKGTVELPGTDGETTTQGLDGLAER	10517	Unambiguous	genomic_reference:SL2.31ch09 evidence_code:10F0H1E1IEG gene_region:2645029-2646904 functional_description:"Fructose-bisphosphate aldolase (AHRD V1 ***- Q2PYX3_SOLTU); contains Interpro domain(s) IPR000741 Fructose-bisphosphate aldolase, class-I "	1	1	Solyc09g009260.1.1		CID	1	0	1	1	0	2.88e-07	649	648	5.36	0	896.31	1	7	25	3045000	3	887.107	2659.31	0	0.42	37.76	3542	3542	MS2	31/100	31	100	EAH2.RAW
High	H	2	ALLAIPTTIADNAGLDSAELIAQLR	20912	Unambiguous	genomic_reference:SL2.31ch11 evidence_code:10F1H1E1IEG gene_region:50651405-50656732 functional_description:"T-complex protein 1 subunit beta (AHRD V1 ***- B6T8X5_MAIZE); contains Interpro domain(s) IPR012716 T-complex protein 1, beta subunit "	1	1	Solyc11g069000.1.1		CID	1	0	1	1	0	8.6e-06	189	197	4.51	0	645.91	0	40	25	241600	3	850.809	2550.41	0	-0.75	82.46	7313	7313	MS2	30/96	30	96	EAC3_150410225534.RAW
High	H	2	AEATDVANAVLDGTDAILLGAETLR	21397	Unambiguous	genomic_reference:SL2.31ch09 evidence_code:10F1H1E1IEG gene_region:2260322-2267191 functional_description:"Pyruvate kinase (AHRD V1 ***- A9P7U5_POPTR); contains Interpro domain(s) IPR001697 Pyruvate kinase "|genomic_reference:SL2.31ch10 evidence_code:10F1H1E1IEG gene_region:62809938-62815473 functional_description:"Pyruvate kinase (AHRD V1 ***- Q94KE3_ARATH); contains Interpro domain(s) IPR001697…	2	2	Solyc09g008840.1.1;Solyc10g083720.1.1		CID	1	0	1	1	0	9.92e-05	535	486	4.01	0	1324.39	0	29	25	260200	3	833.772	2499.3	0	2.87	87.34	7707	7707	MS2	30/96	30	96	EAC3_150410225534.RAW
High	J	2	GAmLGLDQPVIIHmLDIEPAAESLK	15423	Unambiguous	genomic_reference:SL2.31ch01 evidence_code:10F1H1E1IEG gene_region:76111189-76113622 functional_description:"Malate dehydrogenase (AHRD V1 **** Q645N0_SOLLC); contains Interpro domain(s) IPR011274 Malate dehydrogenase, NAD-dependent, cytosolic "	1	1	Solyc01g090710.1.1	M3(Oxidation); M14(Oxidation)	CID	1	0	1	1	0	0.00094	597	578	3.02	0	731.55	0	8	25	1271000	3	898.468	2693.39	0	-0.02	56.33	5259	5259	MS2	30/96	30	96	EAH1.RAW
High	L	2	AEATDVANAVLDGTDAILLGAETLR	21397	Unambiguous	genomic_reference:SL2.31ch09 evidence_code:10F1H1E1IEG gene_region:2260322-2267191 functional_description:"Pyruvate kinase (AHRD V1 ***- A9P7U5_POPTR); contains Interpro domain(s) IPR001697 Pyruvate kinase "|genomic_reference:SL2.31ch10 evidence_code:10F1H1E1IEG gene_region:62809938-62815473 functional_description:"Pyruvate kinase (AHRD V1 ***- Q94KE3_ARATH); contains Interpro domain(s) IPR001697…	2	2	Solyc09g008840.1.1;Solyc10g083720.1.1		CID	1	0	1	1	0	3.19e-16	552	517	3.44	0	1066.19	0	10	25	138900	3	833.77	2499.3	0	0.89	90.69	8012	8012	MS2	30/96	30	96	EAH4.RAW
High	A	2	FGNIELSPASGILNYGQGLFEGLK	19927	Rejected	genomic_reference:SL2.31ch03 evidence_code:10F0H1E1IEG gene_region:11507825-11514153 functional_description:"Branched-chain amino acid aminotransferase (AHRD V1 **** Q9SNY9_SOLTU); contains Interpro domain(s) IPR005786 Branched-chain amino acid aminotransferase II "	1	0			CID	0.0056	0	1	1	0	3.29e-07	504	528	5.33	0	1384.34	0	0	25	227100	3	842.108	2524.31	0	-0.03	75.17	6599	6599	MS2	30/92	30	92	AC1.RAW
High	A	2	FGNIELSPSAGILNYGQGLFEGLK	19928	Selected	genomic_reference:SL2.31ch02 evidence_code:10F0H1E1IEG gene_region:47758983-47765135 functional_description:"Branched-chain-amino-acid aminotransferase (AHRD V1 ***- Q9SNY8_SOLTU); contains Interpro domain(s) IPR005786 Branched-chain amino acid aminotransferase II "	1	1	Solyc02g091970.1.1		CID		0.0056	2	2	0	5.6e-07	504	528	5.3	0	1408.48	0	0	25	227100	3	842.108	2524.31	0	-0.03	75.17	6599	6599	MS2	30/92	30	92	AC1.RAW
High	C	2	VETGVIKPGmVVTFGPTGLTTEVK	34881	Unambiguous	genomic_reference:SL2.31ch06 evidence_code:10F0H1E1IEG gene_region:36374-37800 functional_description:"Elongation factor 1-alpha (AHRD V1 ***- Q8H9C0_SOLTU); contains Interpro domain(s) IPR004539 Translation elongation factor EF1A, eukaryotic and archaeal IPR000795 Protein synthesis factor, GTP-binding "	3	1	Solyc06g005060.1.1	M10(Oxidation)	CID	1	0	1	1	0	4.54e-09	330	297	4.12	0	1081.7	0	17	25	549900	3	826.118	2476.34	0	0.87	44.56	4076	4076	MS2	30/92	30	92	AC3.RAW
High	F	2	VETGVIKPGmVVTFGPTGLTTEVK	34881	Unambiguous	genomic_reference:SL2.31ch06 evidence_code:10F0H1E1IEG gene_region:36374-37800 functional_description:"Elongation factor 1-alpha (AHRD V1 ***- Q8H9C0_SOLTU); contains Interpro domain(s) IPR004539 Translation elongation factor EF1A, eukaryotic and archaeal IPR000795 Protein synthesis factor, GTP-binding "	3	1	Solyc06g005060.1.1	M10(Oxidation)	CID	1	0	1	1	0	9.05e-09	320	289	3.64	0	1134.3	0	14	25	521100	3	826.118	2476.34	0	0.57	47.38	4408	4408	MS2	30/92	30	92	AH4.RAW
High	F	2	VIDGSTFNYSPGTNPQATVMMLGR	117094	Unambiguous	genomic_reference:SL2.31ch08 evidence_code:10F0H1E1IEG gene_region:60677883-60682355 functional_description:"Choline dehydrogenase (AHRD V1 ***- A8NUQ9_COPC7); contains Interpro domain(s) IPR012132 Glucose-methanol-choline oxidoreductase "	1	1	Solyc08g080190.1.1		CID	1	0	1	1	0	3.23e-07	679	644	4.01	0	1430.63	0	13	25	460100	3	852.746	2556.22	0	0.44	54.68	5027	5027	MS2	30/92	30	92	AH4.RAW
High	G	2	VLRPGGYFAYSSPEAYAQDEEDLR	12824	Unambiguous	genomic_reference:SL2.31ch09 evidence_code:10F1H1E1IEG gene_region:65090248-65093777 functional_description:"Dehydration-responsive protein-like (AHRD V1 **-- Q653G1_ORYSJ); contains Interpro domain(s) IPR004159 Protein of unknown function DUF248, methyltransferase putative "	2	1	Solyc09g090190.1.1		CID	1	0	1	1	0	3.15e-16	549	564	3.98	0	1243.59	0	12	25	1208000	3	911.765	2733.28	0	0.4	44.17	4103	4103	MS2	30/92	30	92	EAC2.RAW
High	G	2	FGNIELSPSAGILNYGQGLFEGLK	19928	Selected	genomic_reference:SL2.31ch02 evidence_code:10F0H1E1IEG gene_region:47758983-47765135 functional_description:"Branched-chain-amino-acid aminotransferase (AHRD V1 ***- Q9SNY8_SOLTU); contains Interpro domain(s) IPR005786 Branched-chain amino acid aminotransferase II "	1	1	Solyc02g091970.1.1		CID		0.0306	2	2	0	3.15e-16	504	532	3.8	0	1185.77	0	12	25	415300	3	842.108	2524.31	0	0.41	74.61	6627	6627	MS2	30/92	30	92	EAC2.RAW
High	I	2	AGDSSAEELANATQVQGPYLPIVR	14085	Unambiguous	genomic_reference:SL2.31ch12 evidence_code:10F1H1E1IEG gene_region:63525872-63527074 functional_description:"60S ribosomal protein L13 (AHRD V1 ***- Q3HRY7_SOLTU); contains Interpro domain(s) IPR001380 Ribosomal protein L13e "	1	1	Solyc12g096150.1.1		CID	1	0	1	1	0	4.33e-06	641	631	4.41	0	854.01	0	20	25	628900	3	829.424	2486.26	0	2.17	50.26	4636	4636	MS2	30/92	30	92	EAC4_150411011441.RAW
High	A	2	KLLDELGIPGEDVPVDQFIPLGR	18254	Unambiguous	genomic_reference:SL2.31ch04 evidence_code:10F0H1E1IEG gene_region:53311399-53314673 functional_description:"Isopentenyl-diphosphate delta-isomerase (AHRD V1 **** Q84RZ8_9GENT); contains Interpro domain(s) IPR011876 Isopentenyl-diphosphate delta-isomerase, type 1 "	1	1	Solyc04g056390.1.1		CID	1	0	1	1	0	0.000526	226	262	3.43	0	941.87	1	12	25	823700	3	840.795	2520.37	0	0.14	67.17	5946	5946	MS2	30/88	30	88	AC1.RAW
High	A	2	ASSDLLLVQSDLYTLTDDGYVIR	19218	Unambiguous	genomic_reference:SL2.31ch05 evidence_code:10F0H1E1IEG gene_region:63182582-63189858 functional_description:"UTP-glucose 1 phosphate uridylyltransferase (AHRD V1 **** B3VDY8_EUCGR); contains Interpro domain(s) IPR016267 UTP--glucose-1-phosphate uridylyltransferase, subgroup "	1	1	Solyc05g054060.1.1		CID	1	0	1	1	0	2.29e-06	632	622	4.07	0	1189.47	0	8	25	638400	3	853.106	2557.3	0	-0.27	71.62	6310	6310	MS2	30/88	30	88	AC1.RAW
High	D	2	DILLLDVAPLTLGIETVGGVMTK	21869	Unambiguous	genomic_reference:SL2.31ch03 evidence_code:10F0H1E1IEG gene_region:46342239-46344791 functional_description:"Heat shock protein (AHRD V1 ***- Q84KP8_CYAME); contains Interpro domain(s) IPR013126 Heat shock protein 70 "|genomic_reference:SL2.31ch08 evidence_code:10F1H1E1IEG gene_region:62654909-62658797 functional_description:"Heat shock protein (AHRD V1 ***- Q84KP8_CYAME); contains Interpro domai…	2	2	Solyc03g082920.1.1;Solyc08g082820.1.1		CID	1	0	1	1	0	2.7e-07	116	108	4.65	0	1282.5	0	3	25	112400	3	790.118	2368.34	0	-0.95	94.53	8126	8126	MS2	30/88	30	88	AH2.RAW
High	E	2	STLTDSLVAAAGIIAQEVAGDVR	22031	Unambiguous	genomic_reference:SL2.31ch08 evidence_code:10F0H1E1IEG gene_region:49546658-49549476 functional_description:"Elongation factor EF-2 (AHRD V1 **** Q9SGT4_ARATH); contains Interpro domain(s) IPR000795 Protein synthesis factor, GTP-binding "	2	1	Solyc08g062920.1.1		CID	1	0	1	1	0	0.00527	452	447	3.59	0	1029.71	0	25	25	553500	3	753.073	2257.2	0	0.48	97.7	8461	8461	MS2	30/88	30	88	AH3.RAW
High	G	2	DDLRLPTDENLLSLIKDGFAEGK	63542	Unambiguous	genomic_reference:SL2.31ch04 evidence_code:10F1H1E1IEG gene_region:342655-344857 functional_description:"Eukaryotic translation initiation factor 5A (AHRD V1 **** D6N3G5_GOSHI); contains Interpro domain(s) IPR001884 Translation elongation factor, IF5A "	3	1	Solyc04g005510.1.1		CID	1	0	1	1	0	3.15e-16	536	591	4.27	0	520.48	2	0	25	781500	3	853.782	2559.33	0	0.96	70.53	6291	6291	MS2	30/88	30	88	EAC2.RAW
High	H	2	ILDWADVINAHIISGPGIVDGLK	19692	Unambiguous	genomic_reference:SL2.31ch11 evidence_code:10F0H1E1IEG gene_region:50518935-50523650 functional_description:"Orotidine 5&apos-phosphate decarboxylase (Orotate phosphoribosyltransferase) (AHRD V1 **** C4QAV6_SCHMA); contains Interpro domain(s) IPR001754 Orotidine 5'-phosphate decarboxylase, core "	1	1	Solyc11g068830.1.1		CID	1	0	1	1	0	0.000319	235	250	3.24	0	738.43	0	38	25	248600	3	806.114	2416.33	0	1.61	74.73	6698	6698	MS2	30/88	30	88	EAC3_150410225534.RAW
High	H	2	STLTDSLVAAAGIIAQEVAGDVR	22031	Unambiguous	genomic_reference:SL2.31ch08 evidence_code:10F0H1E1IEG gene_region:49546658-49549476 functional_description:"Elongation factor EF-2 (AHRD V1 **** Q9SGT4_ARATH); contains Interpro domain(s) IPR000795 Protein synthesis factor, GTP-binding "	2	1	Solyc08g062920.1.1		CID	1	0	1	1	0	6.98e-05	452	444	3.63	0	1113.74	0	3	25	299600	3	753.073	2257.2	0	0.24	95.2	8308	8308	MS2	30/88	30	88	EAC3_150410225534.RAW
High	I	2	STLTDSLVAAAGIIAQEVAGDVR	22031	Unambiguous	genomic_reference:SL2.31ch08 evidence_code:10F0H1E1IEG gene_region:49546658-49549476 functional_description:"Elongation factor EF-2 (AHRD V1 **** Q9SGT4_ARATH); contains Interpro domain(s) IPR000795 Protein synthesis factor, GTP-binding "	2	1	Solyc08g062920.1.1		CID	1	0	1	1	0	5.4e-06	436	437	3.32	0	928.93	0	17	25	91280	3	753.073	2257.21	0	0.97	93.12	8370	8370	MS2	30/88	30	88	EAC4_150411011441.RAW
High	J	2	GLLGDKANLSIYDPQVSEDQIQR	12279	Unambiguous	genomic_reference:SL2.31ch02 evidence_code:10F0H1E1IEG gene_region:31886439-31888009 functional_description:"UDP-D-glucose dehydrogenase (AHRD V1 ***- D2WK25_GOSHI); contains Interpro domain(s) IPR014028 UDP-glucose/GDP-mannose dehydrogenase, dimerisation and substrate-binding "	1	1	Solyc02g067080.1.1		CID	1	0	1	1	0	0.00121	645	668	3.86	0	1330.82	1	13	25	2070000	3	853.774	2559.31	0	0.43	45.38	4312	4312	MS2	30/88	30	88	EAH1.RAW
High	J	2	ETVITSLHELLGDSAIGNNPILR	63634	Unambiguous	genomic_reference:SL2.31ch02 evidence_code:10F1H1E1IEG gene_region:16152585-16159388 functional_description:"Coatomer protein epsilon subunit family protein (AHRD V1 ***- D7KFM4_ARALY); contains Interpro domain(s) IPR006822 Coatomer, epsilon subunit "	1	1	Solyc02g030250.1.1		CID	1	0	1	1	0	0.00439	339	333	3.2	0	850.27	0	30	25	488500	3	821.448	2462.33	0	1.71	72.58	6628	6628	MS2	30/88	30	88	EAH1.RAW
High	K	2	FLLDDVYRNPGPLQFDGPGADAK	15277	Unambiguous	genomic_reference:SL2.31ch12 evidence_code:10F1H1E1IEG gene_region:63232222-63238853 functional_description:"Diphosphate--fructose-6-phosphate 1-phosphotransferase (AHRD V1 ***- C8PT93_9SPIO); contains Interpro domain(s) IPR011183 Pyrophosphate-dependent phosphofructokinase PfpB "	2	1	Solyc12g095760.1.1		CID	1	0	1	1	0	9.09e-08	715	709	3.4	0	1398.29	1	32	25	1007000	3	835.752	2505.24	0	-0.17	54.7	4990	4990	MS2	30/88	30	88	EAH2.RAW
High	B	2	SGETEDTFIADLAVGLSTGQIK	19762	Unambiguous	genomic_reference:SL2.31ch09 evidence_code:10F1H1E1IEG gene_region:2371333-2375783 functional_description:"Enolase (AHRD V1 ***- C5J0G6_TOBAC); contains Interpro domain(s) IPR000941 Enolase "|genomic_reference:SL2.31ch10 evidence_code:10F1H1E1IEG gene_region:63994775-63999383 functional_description:"Enolase (AHRD V1 ***- C5J0G6_TOBAC); contains Interpro domain(s) IPR000941 Enolase "	2	2	Solyc09g009020.1.1;Solyc10g085550.1.1		CID	1	0	1	1	0	1.74e-06	619	637	4.31	0	1040.86	0	10	25	390600	3	751.381	2252.13	0	-0.59	72.94	6445	6445	MS2	30/84	30	84	AC2.RAW
High	C	2	YGQDATNVGDEGGFAPNIQENK	7945	Unambiguous	genomic_reference:SL2.31ch09 evidence_code:10F1H1E1IEG gene_region:2371333-2375783 functional_description:"Enolase (AHRD V1 ***- C5J0G6_TOBAC); contains Interpro domain(s) IPR000941 Enolase "|genomic_reference:SL2.31ch10 evidence_code:10F1H1E1IEG gene_region:63994775-63999383 functional_description:"Enolase (AHRD V1 ***- C5J0G6_TOBAC); contains Interpro domain(s) IPR000941 Enolase "	2	2	Solyc09g009020.1.1;Solyc10g085550.1.1		CID	1	0	1	1	0	7.14e-07	385	325	3.63	0	1059.13	0	14	25	1532000	3	775.352	2324.04	0	-0.06	28.68	2700	2700	MS2	30/84	30	84	AC3.RAW
High	C	2	SGETEDTFIADLAVGLSTGQIK	19762	Unambiguous	genomic_reference:SL2.31ch09 evidence_code:10F1H1E1IEG gene_region:2371333-2375783 functional_description:"Enolase (AHRD V1 ***- C5J0G6_TOBAC); contains Interpro domain(s) IPR000941 Enolase "|genomic_reference:SL2.31ch10 evidence_code:10F1H1E1IEG gene_region:63994775-63999383 functional_description:"Enolase (AHRD V1 ***- C5J0G6_TOBAC); contains Interpro domain(s) IPR000941 Enolase "	2	2	Solyc09g009020.1.1;Solyc10g085550.1.1		CID	1	0	1	1	0	1.36e-05	611	631	3.18	0	1101.53	0	18	25	44880	3	751.38	2252.13	0	-1.89	73.64	6450	6450	MS2	30/84	30	84	AC3.RAW
High	F	2	LIGEAADLMQEVAVETFGAMAK	21469	Unambiguous	genomic_reference:SL2.31ch04 evidence_code:10F1H1E1IEG gene_region:49587422-49595735 functional_description:"26S proteasome non-ATPase regulatory subunit 12 (AHRD V1 ***- B5X386_SALSA); contains Interpro domain(s) IPR000717 Proteasome component region PCI "	1	1	Solyc04g051370.1.1		CID	1	0	1	1	0	2.41e-11	660	667	4.49	0	1493.46	0	17	25	140100	3	765.386	2294.14	0	0.56	91.63	8097	8097	MS2	30/84	30	84	AH4.RAW
High	F	2	AVLDVLGLLAGSTSAEVLQQLK	21642	Unambiguous	genomic_reference:SL2.31ch05 evidence_code:10F0H1E1IEG gene_region:3329191-3333740 functional_description:"Cysteinyl tRNA synthetase (AHRD V1 **** D0FY60_BETVU); contains Interpro domain(s) IPR002308 Cysteinyl-tRNA synthetase, class Ia "	1	1	Solyc05g009190.1.1		CID	1	0	1	1	0	1.11e-10	98	83	3.29	0	1599.71	0	30	25	93910	3	742.431	2225.28	0	0.99	93.68	8281	8281	MS2	30/84	30	84	AH4.RAW
High	G	2	FTHILYNLSPAELYEQAIQNEK	39194	Unambiguous	genomic_reference:SL2.31ch12 evidence_code:10F0H1E1IEG gene_region:62058939-62062897 functional_description:"Phosphoenolpyruvate carboxykinase (AHRD V1 ***- Q8W505_SOLLC); contains Interpro domain(s) IPR001272 Phosphoenolpyruvate carboxykinase, ATP-utilising "	1	1	Solyc12g088160.1.1		CID	1	0	1	1	0	3.58e-12	622	600	3.86	0	1184.5	0	2	25	2702000	3	874.447	2621.33	0	0.63	60.67	5477	5477	MS2	30/84	30	84	EAC2.RAW
High	G	2	EPLGVVGLITPWNYPLLMTTWK	42998	Unambiguous	genomic_reference:SL2.31ch03 evidence_code:10F1H1E1IEG gene_region:57895309-57902550 functional_description:"Betaine aldehyde dehydrogenase (AHRD V1 **** D2DEK8_LYCBA); contains Interpro domain(s) IPR015590 Aldehyde dehydrogenase "	1	1	Solyc03g113800.1.1		CID	1	0	1	1	0	3.15e-16	298	296	4.02	0	987.79	0	14	25	124600	3	843.461	2528.37	0	1.93	92.07	8057	8057	MS2	30/84	30	84	EAC2.RAW
High	H	2	LALYDIAGTPGVAADVSHINTR	13484	Unambiguous	genomic_reference:SL2.31ch12 evidence_code:10F1H1E1IEG gene_region:5028935-5033187 functional_description:"Malate dehydrogenase (AHRD V1 ***- Q8L5C9_SOLTU); contains Interpro domain(s) IPR010097 Malate dehydrogenase, NAD-dependent, eukaryotes and gamma proteobacteria "	1	1	Solyc12g014180.1.1		CID	1	0	1	1	0	1.69e-05	475	517	3.7	0	888.61	0	9	19	2651000	3	752.066	2254.18	0	0.29	49.08	4536	4536	MS2	30/84	30	84	EAC3_150410225534.RAW
High	H	2	DLQDDFMGGAEIIKSDPVVSFR	17258	Unambiguous	genomic_reference:SL2.31ch08 evidence_code:10F0H1E1IEG gene_region:49546658-49549476 functional_description:"Elongation factor EF-2 (AHRD V1 **** Q9SGT4_ARATH); contains Interpro domain(s) IPR000795 Protein synthesis factor, GTP-binding "	2	1	Solyc08g062920.1.1		CID	1	0	1	1	0	6.89e-05	668	663	4.5	0	801.54	1	35	25	529700	3	813.733	2439.19	0	-0.3	66.67	6032	6032	MS2	30/84	30	84	EAC3_150410225534.RAW
High	J	2	SIWNEADFIKVSDDEVNFLTQK	18781	Unambiguous	genomic_reference:SL2.31ch11 evidence_code:10F0H1E0IEG gene_region:34310265-34312777 functional_description:"5-dehydro-2-deoxygluconokinase (AHRD V1 **-- IOLC_GEOTN); contains Interpro domain(s) IPR011611 Carbohydrate/purine kinase "	1	1	Solyc11g042850.1.1		CID	1	0	1	1	0	0.000391	718	679	3.32	0	1028.49	1	9	25	1265000	3	866.763	2598.28	0	1.09	70.07	6420	6420	MS2	30/84	30	84	EAH1.RAW
High	J	2	INEFNNEITTVMEDLVNSTDLK	21568	Unambiguous	genomic_reference:SL2.31ch09 evidence_code:10F0H1E1IEG gene_region:5486457-5491126 functional_description:"Acetyl-coenzyme A carboxylase carboxyl transferase subunit alpha (AHRD V1 *-*- B7KJL9_CYAP7); contains Interpro domain(s) IPR001095 Acetyl-CoA carboxylase, alpha subunit "	1	1	Solyc09g013080.1.1		CID	1	0	1	1	0	0.0019	655	644	4.52	0	1266.73	0	3	25	326300	3	847.08	2539.22	0	0.56	90.34	8091	8091	MS2	30/84	30	84	EAH1.RAW
High	K	2	YGQDATNVGDEGGFAPNIQENK	7945	Unambiguous	genomic_reference:SL2.31ch09 evidence_code:10F1H1E1IEG gene_region:2371333-2375783 functional_description:"Enolase (AHRD V1 ***- C5J0G6_TOBAC); contains Interpro domain(s) IPR000941 Enolase "|genomic_reference:SL2.31ch10 evidence_code:10F1H1E1IEG gene_region:63994775-63999383 functional_description:"Enolase (AHRD V1 ***- C5J0G6_TOBAC); contains Interpro domain(s) IPR000941 Enolase "	2	2	Solyc09g009020.1.1;Solyc10g085550.1.1		CID	1	0	1	1	0	2.97e-07	372	314	3.41	0	1189.99	0	23	25	2364000	3	775.352	2324.04	0	-0.61	29.39	2802	2802	MS2	30/84	30	84	EAH2.RAW
High	K	2	ELDALLSDESLATVPFLILGNK	21108	Unambiguous	genomic_reference:SL2.31ch01 evidence_code:10F1H1E1IEG gene_region:71122874-71128182 functional_description:"ADP-ribosylation factor-like protein 3 (AHRD V1 **-- ARL3_CAEEL); contains Interpro domain(s) IPR006687 GTP-binding protein SAR1 "	2	1	Solyc01g079540.1.1		CID	1	0	1	1	0	8.27e-06	322	329	3.39	0	704.42	0	17	25	167800	3	786.766	2358.28	0	1.13	85.22	7527	7527	MS2	30/84	30	84	EAH2.RAW
High	K	2	LIGEAADLMQEVAVETFGAMAK	21469	Unambiguous	genomic_reference:SL2.31ch04 evidence_code:10F1H1E1IEG gene_region:49587422-49595735 functional_description:"26S proteasome non-ATPase regulatory subunit 12 (AHRD V1 ***- B5X386_SALSA); contains Interpro domain(s) IPR000717 Proteasome component region PCI "	1	1	Solyc04g051370.1.1		CID	1	0	1	1	0	1.47e-09	643	652	4.49	0	1663.01	0	0	25	70790	3	765.386	2294.14	0	0.88	88.1	7785	7785	MS2	30/84	30	84	EAH2.RAW
High	E	2	LIADDSDFFANMVVEAVQAVK	21668	Unambiguous	genomic_reference:SL2.31ch01 evidence_code:10F1H1E1IEG gene_region:76163502-76172429 functional_description:"T-complex protein 1 subunit alpha (AHRD V1 ***- B9SF60_RICCO); contains Interpro domain(s) IPR012715 T-complex protein 1, alpha subunit "	1	1	Solyc01g090750.1.1		CID	1	0	1	1	0	0.00127	671	654	4.7	0	634.8	0	6	25	209800	3	761.385	2282.14	0	1.89	96.08	8328	8328	MS2	30/80	30	80	AH3.RAW
High	F	2	SLGIDTVPVLVGPVSFLLLSK	85757	Unambiguous	genomic_reference:SL2.31ch01 evidence_code:10F0H1E1IEG gene_region:3229113-3234704 functional_description:"5-methyltetrahydropteroyltriglutamate--homocysteine methyltransferase (AHRD V1 ***- B6UF55_MAIZE); contains Interpro domain(s) IPR006276 5-methyltetrahydropteroyltriglutamate--homocysteine S-methyltransferase "	1	1	Solyc01g009180.1.1		CID	1	0	1	1	0	2.84e-10	33	29	4.65	0	1556.77	0	29	25	51360	3	718.766	2154.28	0	1.76	94.85	8388	8388	MS2	30/80	30	80	AH4.RAW
High	G	2	ALVVINPGNPTGQVLGEANQR	11666	Unambiguous	genomic_reference:SL2.31ch06 evidence_code:10F0H1E1IEG gene_region:36234655-36238685 functional_description:"Alanine aminotransferase (AHRD V1 **** Q6VEJ5_CAPAN); contains Interpro domain(s) IPR004839 Aminotransferase, class I and II "	1	1	Solyc06g063090.1.1		CID	1	0	1	1	0	3.15e-16	420	394	3.4	0	1371.55	0	6	17	3024000	3	716.391	2147.16	0	0.9	40.42	3784	3784	MS2	30/80	30	80	EAC2.RAW
High	G	2	SLGIDTVPVLVGPVSFLLLSK	85757	Unambiguous	genomic_reference:SL2.31ch01 evidence_code:10F0H1E1IEG gene_region:3229113-3234704 functional_description:"5-methyltetrahydropteroyltriglutamate--homocysteine methyltransferase (AHRD V1 ***- B6UF55_MAIZE); contains Interpro domain(s) IPR006276 5-methyltetrahydropteroyltriglutamate--homocysteine S-methyltransferase "	1	1	Solyc01g009180.1.1		CID	1	0	1	1	0	3.15e-16	43	38	4.08	0	1655.65	0	25	25	110300	3	718.763	2154.28	0	-1.56	91.84	8038	8038	MS2	30/80	30	80	EAC2.RAW
High	H	2	LTGMAFRVPTVDVSVVDLTAR	15163	Unambiguous	genomic_reference:SL2.31ch05 evidence_code:10F0H1E0IEG gene_region:648534-651184 functional_description:"Glyceraldehyde-3-phosphate dehydrogenase (AHRD V1 **** Q9XG67_TOBAC); contains Interpro domain(s) IPR000173 Glyceraldehyde 3-phosphate dehydrogenase "	1	1	Solyc05g005820.1.1		CID	1	0	1	1	0.00031	0.00073	312	282	3.07	0	1135.67	1	44	25	239700	3	749.746	2247.22	0	3.13	63.25	5740	5740	MS2	30/80	30	80	EAC3_150410225534.RAW
High	I	2	TVDTTGAGDAFVGSLLVSIAK	18841	Unambiguous	genomic_reference:SL2.31ch11 evidence_code:10F0H1E0IEG gene_region:34310265-34312777 functional_description:"5-dehydro-2-deoxygluconokinase (AHRD V1 **-- IOLC_GEOTN); contains Interpro domain(s) IPR011611 Carbohydrate/purine kinase "	1	1	Solyc11g042850.1.1		CID	1	0	1	1	0	3.39e-08	438	418	3.83	0	1399.82	0	41	25	152000	3	674.697	2022.08	0	0.42	69.04	6230	6230	MS2	30/80	30	80	EAC4_150411011441.RAW
High	I	2	SYDSTTHFESTVMDVLDMYSK	18412	Unambiguous	genomic_reference:SL2.31ch01 evidence_code:10F1H1E1IEG gene_region:85610405-85615953 functional_description:"Rab-GDP dissociation inhibitor (AHRD V1 **** A5CKE3_SOLLC); contains Interpro domain(s) IPR000806 Rab GDI protein "	1	1	Solyc01g105810.1.1		CID	1	0	1	1	0	5.3e-08	225	220	4.65	0	1947.32	0	14	25	154100	3	819.36	2456.06	0	0.56	71.27	6420	6420	MS2	30/80	30	80	EAC4_150411011441.RAW
High	I	2	LIADDSDFFANMVVEAVQAVK	21668	Unambiguous	genomic_reference:SL2.31ch01 evidence_code:10F1H1E1IEG gene_region:76163502-76172429 functional_description:"T-complex protein 1 subunit alpha (AHRD V1 ***- B9SF60_RICCO); contains Interpro domain(s) IPR012715 T-complex protein 1, alpha subunit "	1	1	Solyc01g090750.1.1		CID	1	0	1	1	0	4.05e-09	675	676	4.82	0	783.58	0	4	25	72660	3	761.384	2282.14	0	0.05	88.08	7934	7934	MS2	30/80	30	80	EAC4_150411011441.RAW
High	J	2	IPSAVGYQPTLATDLGGLQER	13265	Unambiguous	genomic_reference:SL2.31ch02 evidence_code:10F0H1E0IEG gene_region:47123903-47126760 functional_description:"ATP synthase subunit beta (AHRD V1 ***- Q9ZR78_NICSY); contains Interpro domain(s) IPR005722 ATPase, F1 complex, beta subunit "|genomic_reference:SL2.31ch04 evidence_code:10F1H1E1IEG gene_region:1237570-1241219 functional_description:"ATP synthase subunit beta (AHRD V1 ***- O82722_NICSY); …	3	3	Solyc02g091130.1.1;Solyc04g007550.1.1;Solyc05g008460.1.1		CID	1	0	1	1	0	5.77e-05	504	516	4.53	0	1560.09	0	5	11	7622000	3	729.387	2186.15	0	0.99	48.98	4624	4624	MS2	30/80	30	80	EAH1.RAW
High	K	2	ADRDESSPYAAmLAAQDVSQR	7260	Unambiguous	genomic_reference:SL2.31ch02 evidence_code:10F1H1E1IEG gene_region:34880949-34883668 functional_description:"30S ribosomal protein S11 (AHRD V1 ***- RS11_CAUSK); contains Interpro domain(s) IPR018102 Ribosomal S11, conserved site "|genomic_reference:SL2.31ch09 evidence_code:10F1H1E1IEG gene_region:3490217-3492478 functional_description:"30S ribosomal protein S11 (AHRD V1 ***- RS11_CAUSK); contain…	2	2	Solyc02g070570.1.1;Solyc09g010100.1.1	M12(Oxidation)	CID	1	0	1	1	0	7.87e-08	403	416	3.78	0	1042.24	1	20	25	1387000	3	766.354	2297.05	0	0.71	26.69	2557	2557	MS2	30/80	30	80	EAH2.RAW
High	L	2	ADRDESSPYAAmLAAQDVSQR	7260	Unambiguous	genomic_reference:SL2.31ch02 evidence_code:10F1H1E1IEG gene_region:34880949-34883668 functional_description:"30S ribosomal protein S11 (AHRD V1 ***- RS11_CAUSK); contains Interpro domain(s) IPR018102 Ribosomal S11, conserved site "|genomic_reference:SL2.31ch09 evidence_code:10F1H1E1IEG gene_region:3490217-3492478 functional_description:"30S ribosomal protein S11 (AHRD V1 ***- RS11_CAUSK); contain…	2	2	Solyc02g070570.1.1;Solyc09g010100.1.1	M12(Oxidation)	CID	1	0	1	1	0	3.19e-16	360	370	3.01	0	1320.06	1	21	25	229000	3	766.352	2297.04	0	-2.4	27.59	2625	2625	MS2	30/80	30	80	EAH4.RAW
High	A	2	IGANEPSQLAINDNANGLAR	8316	Unambiguous	genomic_reference:SL2.31ch09 evidence_code:10F0H1E1IEG gene_region:2645029-2646904 functional_description:"Fructose-bisphosphate aldolase (AHRD V1 ***- Q2PYX3_SOLTU); contains Interpro domain(s) IPR000741 Fructose-bisphosphate aldolase, class-I "|genomic_reference:SL2.31ch10 evidence_code:10F1H1E1IEG gene_region:62683898-62686621 functional_description:"Fructose-bisphosphate aldolase (AHRD V1 ***…	2	2	Solyc09g009260.1.1;Solyc10g083570.1.1		CID	1	0	1	1	0	1.44e-07	596	601	4.91	0	1330.19	0	9	10	5102000	3	680.015	2038.03	0	0.32	30.51	2842	2842	MS2	30/76	30	76	AC1.RAW
High	A	2	LYmEARPMEEGLAEAIDEGR	9460	Unambiguous	genomic_reference:SL2.31ch08 evidence_code:10F0H1E1IEG gene_region:49546658-49549476 functional_description:"Elongation factor EF-2 (AHRD V1 **** Q9SGT4_ARATH); contains Interpro domain(s) IPR000795 Protein synthesis factor, GTP-binding "	2	1	Solyc08g062920.1.1	M3(Oxidation)	CID	1	0	1	1	0	2.08e-07	483	513	4.3	0	1326.12	0	7	25	2181000	3	766.025	2296.06	0	0.46	45.66	4154	4154	MS2	30/76	30	76	AC1.RAW
High	A	2	YHPEVDLDEVNALAQLmTWK	16841	Unambiguous	genomic_reference:SL2.31ch05 evidence_code:10F0H1E1IEG gene_region:61565704-61570805 functional_description:"Glutamate dehydrogenase (AHRD V1 **** Q94IA5_BRANA); contains Interpro domain(s) IPR014362 Glutamate dehydrogenase "	1	1	Solyc05g052100.1.1	M17(Oxidation)	CID	1	0	1	1	0	5.99e-06	641	681	4.17	0	1570.73	0	19	25	514100	3	796.723	2388.15	0	0.24	61.12	5447	5447	MS2	30/76	30	76	AC1.RAW
High	B	2	YRVENLYEGPLDDAYANAIR	13960	Unambiguous	genomic_reference:SL2.31ch08 evidence_code:10F0H1E1IEG gene_region:49546658-49549476 functional_description:"Elongation factor EF-2 (AHRD V1 **** Q9SGT4_ARATH); contains Interpro domain(s) IPR000795 Protein synthesis factor, GTP-binding "	2	1	Solyc08g062920.1.1		CID	1	0	1	1	0	5.18e-06	629	624	4.13	0	1621.47	1	6	25	1932000	3	781.386	2342.14	0	0.62	49.4	4497	4497	MS2	30/76	30	76	AC2.RAW
High	C	2	FAPPKVPGIDDVTGEPLIQR	13469	Unambiguous	genomic_reference:SL2.31ch03 evidence_code:10F1H1E1IEG gene_region:55891925-55895339 functional_description:"Adenylate kinase (AHRD V1 ***- D7MQ61_ARALY); contains Interpro domain(s) IPR006259 Adenylate kinase, subfamily "	1	1	Solyc03g111200.1.1		CID	1	0	1	1	0	4.77e-07	346	345	3.89	0	1418.6	1	20	25	1102000	3	717.06	2149.17	0	0.41	47.59	4328	4328	MS2	30/76	30	76	AC3.RAW
High	C	2	FITDVGATINHDPEIGDLLK	14990	Unambiguous	genomic_reference:SL2.31ch03 evidence_code:10F0H1E1IEG gene_region:38800465-38808751 functional_description:"Phosphorylase (AHRD V1 **** B9SJB6_RICCO); contains Interpro domain(s) IPR011833 Glycogen/starch/alpha-glucan phosphorylase "	1	1	Solyc03g065340.1.1		CID	1	0	1	1	0	1.48e-05	539	556	3.58	0	1017.39	0	21	21	2000000	3	723.379	2168.12	0	-0.52	52.78	4758	4758	MS2	30/76	30	76	AC3.RAW
High	C	2	AGELTAAELDSLMVVVANPR	17905	Unambiguous	genomic_reference:SL2.31ch06 evidence_code:10F1H1E1IEG gene_region:41600371-41601864 functional_description:"40S ribosomal protein S18 (AHRD V1 ***- B4G286_MAIZE); contains Interpro domain(s) IPR001892 Ribosomal protein S13 "	2	1	Solyc06g073370.1.1		CID	1	0	1	1	0	1.53e-08	527	557	3.66	0	1167.23	0	11	25	534300	3	686.03	2056.08	0	0.35	64.75	5738	5738	MS2	30/76	30	76	AC3.RAW
High	D	2	IGANEPSQLAINDNANGLAR	8316	Unambiguous	genomic_reference:SL2.31ch09 evidence_code:10F0H1E1IEG gene_region:2645029-2646904 functional_description:"Fructose-bisphosphate aldolase (AHRD V1 ***- Q2PYX3_SOLTU); contains Interpro domain(s) IPR000741 Fructose-bisphosphate aldolase, class-I "|genomic_reference:SL2.31ch10 evidence_code:10F1H1E1IEG gene_region:62683898-62686621 functional_description:"Fructose-bisphosphate aldolase (AHRD V1 ***…	2	2	Solyc09g009260.1.1;Solyc10g083570.1.1		CID	1	0	1	1	0	2.61e-08	596	600	4.3	0	1259.39	0	18	24	1513000	3	680.015	2038.03	0	0.23	29.25	2698	2698	MS2	30/76	30	76	AH2.RAW
High	D	2	YRVENLYEGPLDDAYANAIR	13960	Unambiguous	genomic_reference:SL2.31ch08 evidence_code:10F0H1E1IEG gene_region:49546658-49549476 functional_description:"Elongation factor EF-2 (AHRD V1 **** Q9SGT4_ARATH); contains Interpro domain(s) IPR000795 Protein synthesis factor, GTP-binding "	2	1	Solyc08g062920.1.1		CID	1	0	1	1	0	8.93e-06	630	633	4.35	0	1760.86	1	5	14	3656000	3	781.385	2342.14	0	-0.01	48.88	4399	4399	MS2	30/76	30	76	AH2.RAW
High	D	2	IVGNIGDQWSDLLGDYVGQR	17926	Unambiguous	genomic_reference:SL2.31ch03 evidence_code:10F0H1E1IEG gene_region:63376561-63377589 functional_description:"Acid phosphatase (AHRD V1 **-- O49855_SOYBN); contains Interpro domain(s) IPR010028 Acid phosphatase, plant "	1	1	Solyc03g121100.1.1		CID	1	0	1	1	0	2.64e-05	649	657	4.12	0	1037.33	0	9	25	1566000	3	735.703	2205.1	0	0.73	64.83	5724	5724	MS2	30/76	30	76	AH2.RAW
High	E	2	LYmEARPmEEGLAEAIDEGR	9460	Unambiguous	genomic_reference:SL2.31ch08 evidence_code:10F0H1E1IEG gene_region:49546658-49549476 functional_description:"Elongation factor EF-2 (AHRD V1 **** Q9SGT4_ARATH); contains Interpro domain(s) IPR000795 Protein synthesis factor, GTP-binding "	2	1	Solyc08g062920.1.1	M3(Oxidation); M8(Oxidation)	CID	1	0	1	1	0	6.33e-06	410	439	3.87	0	1272.5	0	5	23	1847000	3	771.357	2312.06	0	0.97	37.66	3461	3461	MS2	30/76	30	76	AH3.RAW
High	E	2	TAAYGHFGRDDPDFTWETVK	10668	Unambiguous	genomic_reference:SL2.31ch09 evidence_code:10F1H1E1IEG gene_region:1749910-1751082 functional_description:"S-adenosylmethionine synthase (AHRD V1 ***- B5LAW6_CAPAN); contains Interpro domain(s) IPR002133 S-adenosylmethionine synthetase "	1	1	Solyc09g008280.1.1		CID	1	0	1	1	0	0.00663	472	490	3.2	0	936.84	1	7	25	1445000	3	771.69	2313.06	0	-0.19	41.9	3833	3833	MS2	30/76	30	76	AH3.RAW
High	E	2	ELVANDQWLNTEFITTVQQR	16359	Unambiguous	genomic_reference:SL2.31ch01 evidence_code:10F1H1E1IEG gene_region:76111189-76113622 functional_description:"Malate dehydrogenase (AHRD V1 **** Q645N0_SOLLC); contains Interpro domain(s) IPR011274 Malate dehydrogenase, NAD-dependent, cytosolic "	1	1	Solyc01g090710.1.1		CID	1	0	1	1	0	0.000987	745	699	3.92	0	932.51	0	2	25	2283000	3	802.409	2405.21	0	0.7	63.87	5689	5689	MS2	30/76	30	76	AH3.RAW
High	F	2	DTFGPILVPSDKLWGAQTQR	14984	Unambiguous	genomic_reference:SL2.31ch09 evidence_code:10F1H1E1IEG gene_region:62645740-62653816 functional_description:"Fumarate hydratase class II (AHRD V1 ***- C5GAL1_AJEDR); contains Interpro domain(s) IPR005677 Fumarate hydratase, class II "	1	1	Solyc09g075450.1.1		CID	1	0	1	1	0	2.93e-07	534	556	3.51	0	1282.1	1	12	25	545100	3	743.728	2229.17	0	1.43	56.14	5150	5150	MS2	30/76	30	76	AH4.RAW
High	F	2	LFASNVLVSGIQGLGAEIAK	122958	Unambiguous	genomic_reference:SL2.31ch06 evidence_code:10F0H1E1IEG gene_region:1338905-1347041 functional_description:"Ubiquitin-activating enzyme E1 (AHRD V1 ***- B9SKU8_RICCO); contains Interpro domain(s) IPR018075 Ubiquitin-activating enzyme, E1 "	1	1	Solyc06g007320.1.1		CID	1	0	1	1	0	1.07e-07	174	163	3.84	0	1719.31	0	13	25	24830	3	663.046	1987.12	0	0.76	74.98	6704	6704	MS2	30/76	30	76	AH4.RAW
High	F	2	LFAANVLISGLQGLGAEIAK	124942	Unambiguous	genomic_reference:SL2.31ch09 evidence_code:10F0H1E1IEG gene_region:14928099-14933587 functional_description:"Ubiquitin-activating enzyme E1 (AHRD V1 **** Q75VJ8_TOBAC); contains Interpro domain(s) IPR018075 Ubiquitin-activating enzyme, E1 "	1	1	Solyc09g018450.1.1		CID	1	0	1	1	0	1.37e-08	112	108	3.8	0	1741.44	0	35	25	77000	3	662.388	1985.15	0	2.55	90.38	7983	7983	MS2	30/76	30	76	AH4.RAW
High	F	2	DELLETAGEVFANVASGVLR	125636	Unambiguous	genomic_reference:SL2.31ch06 evidence_code:10F0H1E1IEG gene_region:20384815-20392058 functional_description:"Alcohol dehydrogenase zinc-binding domain protein (AHRD V1 ***- A6X535_OCHA4); contains Interpro domain(s) IPR002085 Alcohol dehydrogenase superfamily, zinc-containing "	1	1	Solyc06g034120.1.1		CID	1	0	1	1	0	3.88e-06	658	628	3.58	0	1538.38	0	17	25	50990	3	697.364	2090.08	0	0.8	95.55	8450	8450	MS2	30/76	30	76	AH4.RAW
High	G	2	VSQMIEDHEPFEGQALLDAK	10284	Unambiguous	genomic_reference:SL2.31ch06 evidence_code:10F1H1E1IEG gene_region:6258168-6260708 functional_description:"Elongation factor 1-gamma (AHRD V1 ***- B7SDI2_ORYSJ); contains Interpro domain(s) IPR001662 Translation elongation factor EF1B, gamma chain, conserved "	1	1	Solyc06g011280.1.1		CID	1	0	1	1	0	3.15e-16	667	645	4.17	0	1467.71	0	20	19	1848000	3	753.033	2257.08	0	1.14	39.46	3702	3702	MS2	30/76	30	76	EAC2.RAW
High	G	2	LYmEARPMEEGLAEAIDEGR	9460	Unambiguous	genomic_reference:SL2.31ch08 evidence_code:10F0H1E1IEG gene_region:49546658-49549476 functional_description:"Elongation factor EF-2 (AHRD V1 **** Q9SGT4_ARATH); contains Interpro domain(s) IPR000795 Protein synthesis factor, GTP-binding "	2	1	Solyc08g062920.1.1	M3(Oxidation)	CID	1	0	1	1	0	3.15e-16	477	510	3.55	0	1443.84	0	12	21	1348000	3	766.024	2296.06	0	-0.1	43.06	4010	4010	MS2	30/76	30	76	EAC2.RAW
High	G	2	YVDEPAFTDLHWGMFIPAIK	19715	Unambiguous	genomic_reference:SL2.31ch08 evidence_code:10F1H1E1IEG gene_region:59370255-59379214 functional_description:"Acyl-coenzyme A oxidase (AHRD V1 **** D7MCB8_ARALY); contains Interpro domain(s) IPR012258 Acyl-CoA oxidase "	1	1	Solyc08g078390.1.1		CID	1	0	1	1	0	3.15e-16	702	663	3.31	0	666.85	0	13	25	291100	3	784.058	2350.16	0	1.24	72.5	6455	6455	MS2	30/76	30	76	EAC2.RAW
High	G	2	FTDPYYWLTYFPPLAVEDLK	21563	Unambiguous	genomic_reference:SL2.31ch02 evidence_code:10F0H1E1IEG gene_region:31068392-31071631 functional_description:"Leucyl-tRNA synthetase (AHRD V1 **** Q5PPJ6_RAT); contains Interpro domain(s) IPR004493 Leucyl-tRNA synthetase, class Ia, archaeal/eukaryotic cytosolic "	1	1	Solyc02g065300.1.1		CID	1	0	1	1	0	3.15e-16	721	658	3.96	0	1584.03	0	18	25	144900	3	826.748	2478.23	0	1.03	89.54	7846	7846	MS2	30/76	30	76	EAC2.RAW
High	G	2	FDDGLPPILTALEVLDNQIR	21890	Unambiguous	genomic_reference:SL2.31ch04 evidence_code:10F1H1E1IEG gene_region:1237570-1241219 functional_description:"ATP synthase subunit beta (AHRD V1 ***- O82722_NICSY); contains Interpro domain(s) IPR005722 ATPase, F1 complex, beta subunit "	1	1	Solyc04g007550.1.1		CID	1	0	1	1	0	3.15e-16	403	361	3.36	0	847.66	0	11	25	319500	3	747.071	2239.2	0	0.87	95.39	8345	8345	MS2	30/76	30	76	EAC2.RAW
High	H	2	VELGDATTAADPSGEHVISR	6763	Unambiguous	genomic_reference:SL2.31ch12 evidence_code:10F1H1E1IEG gene_region:63232222-63238853 functional_description:"Diphosphate--fructose-6-phosphate 1-phosphotransferase (AHRD V1 ***- C8PT93_9SPIO); contains Interpro domain(s) IPR011183 Pyrophosphate-dependent phosphofructokinase PfpB "	1	1	Solyc12g095760.1.1		CID	1	0	1	1	0	2.72e-07	634	619	3.03	0	872.15	0	26	16	2401000	3	675.668	2024.99	0	0.27	26.08	2502	2502	MS2	30/76	30	76	EAC3_150410225534.RAW
High	H	2	ELVANDQWLNTEFITTVQQR	16359	Unambiguous	genomic_reference:SL2.31ch01 evidence_code:10F1H1E1IEG gene_region:76111189-76113622 functional_description:"Malate dehydrogenase (AHRD V1 **** Q645N0_SOLLC); contains Interpro domain(s) IPR011274 Malate dehydrogenase, NAD-dependent, cytosolic "	1	1	Solyc01g090710.1.1		CID	1	0	1	1	0	6.41e-06	734	692	3.81	0	1287.78	0	25	25	801900	3	802.408	2405.21	0	-0.06	61.3	5575	5575	MS2	30/76	30	76	EAC3_150410225534.RAW
High	I	2	DTFGPILVPSDKLWGAQTQR	14984	Unambiguous	genomic_reference:SL2.31ch09 evidence_code:10F1H1E1IEG gene_region:62645740-62653816 functional_description:"Fumarate hydratase class II (AHRD V1 ***- C5GAL1_AJEDR); contains Interpro domain(s) IPR005677 Fumarate hydratase, class II "	1	1	Solyc09g075450.1.1		CID	1	0	1	1	0	8.65e-06	526	548	3.43	0	1044.07	1	7	25	450900	3	743.728	2229.17	0	1.01	54.11	4968	4968	MS2	30/76	30	76	EAC4_150411011441.RAW
High	I	2	DLIGPAMYFGLMGDGQPIGR	15282	Unambiguous	genomic_reference:SL2.31ch05 evidence_code:10F1H1E1IEG gene_region:5295300-5297348 functional_description:"Alpha-1 4-glucan-protein synthase (AHRD V1 **-* B9RLK7_RICCO); contains Interpro domain(s) IPR004901 Alpha-1,4-glucan-protein synthase, UDP-forming "|genomic_reference:SL2.31ch02 evidence_code:10F0H1E0IEG gene_region:45629552-45630857 functional_description:"Alpha-1 4-glucan-protein synthase…	3	3	Solyc05g012070.1.1;Solyc02g089170.1.1;Solyc03g070390.1.1		CID	1	0	1	1	0	9.58e-07	575	543	4.25	0	1104.91	0	28	25	215900	3	703.348	2108.03	0	-0.02	70.09	6320	6320	MS2	30/76	30	76	EAC4_150411011441.RAW
High	J	2	YRVENLYEGPLDDAYANAIR	13960	Unambiguous	genomic_reference:SL2.31ch08 evidence_code:10F0H1E1IEG gene_region:49546658-49549476 functional_description:"Elongation factor EF-2 (AHRD V1 **** Q9SGT4_ARATH); contains Interpro domain(s) IPR000795 Protein synthesis factor, GTP-binding "	2	1	Solyc08g062920.1.1		CID	1	0	1	1	0	0.000224	636	624	3.76	0	1901.09	1	8	13	3292000	3	781.386	2342.14	0	1.08	50.86	4787	4787	MS2	30/76	30	76	EAH1.RAW
High	J	2	DTFGPILVPSDKLWGAQTQR	14984	Unambiguous	genomic_reference:SL2.31ch09 evidence_code:10F1H1E1IEG gene_region:62645740-62653816 functional_description:"Fumarate hydratase class II (AHRD V1 ***- C5GAL1_AJEDR); contains Interpro domain(s) IPR005677 Fumarate hydratase, class II "	1	1	Solyc09g075450.1.1		CID	1	0	1	1	0	6.46e-05	531	553	3.85	0	1287.14	1	12	15	2131000	3	743.728	2229.17	0	1.1	54.82	5128	5128	MS2	30/76	30	76	EAH1.RAW
High	K	2	EAPSFVEQATEQQILVTGIK	14781	Unambiguous	genomic_reference:SL2.31ch02 evidence_code:10F0H1E0IEG gene_region:47123903-47126760 functional_description:"ATP synthase subunit beta (AHRD V1 ***- Q9ZR78_NICSY); contains Interpro domain(s) IPR005722 ATPase, F1 complex, beta subunit "	1	1	Solyc02g091130.1.1		CID	1	0	1	1	0	1.73e-07	515	507	4.02	0	1441.1	0	15	25	1656000	3	730.055	2188.15	0	0.17	52.92	4841	4841	MS2	30/76	30	76	EAH2.RAW
High	K	2	IDELVEEAVEFADESPHPVR	16651	Unambiguous	genomic_reference:SL2.31ch12 evidence_code:10F0H1E1IEG gene_region:2683408-2687114 functional_description:"Pyruvate dehydrogenase E1 component alpha subunit (AHRD V1 ***- Q5N030_SYNP6); contains Interpro domain(s) IPR017597 Pyruvate dehydrogenase (acetyl-transferring) E1 component, alpha subunit, subgroup y "	2	1	Solyc12g009400.1.1		CID	1	0	1	1	0	9.82e-10	673	681	3.4	0	859.86	0	9	25	1347000	3	761.038	2281.1	0	0.57	59.74	5414	5414	MS2	30/76	30	76	EAH2.RAW
High	K	2	VTGGELITEGEDELYHLGIR	19585	Unambiguous	genomic_reference:SL2.31ch06 evidence_code:10F0H1E1IEG gene_region:30572262-30577989 functional_description:"Multiple inositol polyphosphate phosphatase (AHRD V1 ***- Q54ND5_DICDI); contains Interpro domain(s) IPR016274 Histidine acid phosphatase, eukaryotic "	1	1	Solyc06g050990.1.1		CID	1	0	1	1	0	3.42e-07	669	650	3.26	0	646.52	0	32	25	537400	3	734.374	2201.11	0	0.03	72.66	6500	6500	MS2	30/76	30	76	EAH2.RAW
High	L	2	DTFGPILVPSDKLWGAQTQR	14984	Unambiguous	genomic_reference:SL2.31ch09 evidence_code:10F1H1E1IEG gene_region:62645740-62653816 functional_description:"Fumarate hydratase class II (AHRD V1 ***- C5GAL1_AJEDR); contains Interpro domain(s) IPR005677 Fumarate hydratase, class II "	1	1	Solyc09g075450.1.1		CID	1	0	1	1	0	3.19e-16	525	538	3.55	0	1210.62	1	14	23	986100	3	743.727	2229.17	0	0.44	56.26	5116	5116	MS2	30/76	30	76	EAH4.RAW
High	L	2	IVGNIGDQWSDLLGDYVGQR	17926	Unambiguous	genomic_reference:SL2.31ch03 evidence_code:10F0H1E1IEG gene_region:63376561-63377589 functional_description:"Acid phosphatase (AHRD V1 **-- O49855_SOYBN); contains Interpro domain(s) IPR010028 Acid phosphatase, plant "	1	1	Solyc03g121100.1.1		CID	1	0	1	1	0	3.19e-16	647	655	3.74	0	1286.4	0	15	25	569100	3	735.703	2205.1	0	0.82	68.04	6115	6115	MS2	30/76	30	76	EAH4.RAW
High	B	2	QISELGIYPAVDPLDSTSR	14114	Unambiguous	genomic_reference:SL2.31ch02 evidence_code:10F0H1E0IEG gene_region:47123903-47126760 functional_description:"ATP synthase subunit beta (AHRD V1 ***- Q9ZR78_NICSY); contains Interpro domain(s) IPR005722 ATPase, F1 complex, beta subunit "|genomic_reference:SL2.31ch04 evidence_code:10F1H1E1IEG gene_region:1237570-1241219 functional_description:"ATP synthase subunit beta (AHRD V1 ***- O82722_NICSY); …	3	3	Solyc02g091130.1.1;Solyc04g007550.1.1;Solyc05g008460.1.1		CID	1	0	1	1	0	3.24e-07	625	639	3.75	0	1443.57	0	32	25	602100	3	687.689	2061.05	0	0.62	49.9	4537	4537	MS2	30/72	30	72	AC2.RAW
High	C	2	ALEEEIENmGGHLNAYTSR	9105	Unambiguous	genomic_reference:SL2.31ch05 evidence_code:10F1H1E1IEG gene_region:5715526-5720889 functional_description:"Mitochondrial processing peptidase beta subunit (AHRD V1 ***- Q9AXQ2_CUCME); contains Interpro domain(s) IPR011237 Peptidase M16, core "	1	1	Solyc05g012480.1.1	M9(Oxidation)	CID	1	0	1	1	0	5.63e-09	472	487	3.23	0	1183.03	0	3	25	975000	3	717.333	2149.98	0	1.25	32.31	3024	3024	MS2	30/72	30	72	AC3.RAW
High	C	2	VPVLQTPDGPVFESNAIAR	12337	Unambiguous	genomic_reference:SL2.31ch06 evidence_code:10F1H1E1IEG gene_region:6258168-6260708 functional_description:"Elongation factor 1-gamma (AHRD V1 ***- B7SDI2_ORYSJ); contains Interpro domain(s) IPR001662 Translation elongation factor EF1B, gamma chain, conserved "	1	1	Solyc06g011280.1.1		CID	1	0	1	1	0	7.85e-05	389	419	3.39	0	1516.07	0	13	25	962700	3	670.695	2010.07	0	1.71	43.65	4000	4000	MS2	30/72	30	72	AC3.RAW
High	C	2	DFDEPGHLAPTGLFLAGTK	13920	Unambiguous	genomic_reference:SL2.31ch12 evidence_code:10F0H1E0IEG gene_region:45136185-45136828 functional_description:"Profilin (AHRD V1 ***- Q9SMC0_TOBAC); contains Interpro domain(s) IPR005455 Profilin, plant "	1	1	Solyc12g044630.1.1		CID	1	0	1	1	0	8.59e-06	613	608	3.07	0	1627.16	0	72	25	979600	3	662.671	1986	0	0.67	49.24	4465	4465	MS2	30/72	30	72	AC3.RAW
High	C	2	DAFPSLFSDVFDPFSPPIR	21133	Unambiguous	genomic_reference:SL2.31ch08 evidence_code:10F1H1E1IEG gene_region:59635405-59636272 functional_description:"Heat shock protein 22 (AHRD V1 ***- Q27JQ0_METAN); contains Interpro domain(s) IPR002068 Heat shock protein Hsp20 "	1	1	Solyc08g078700.1.1		CID	1	0	1	1	0	1.15e-08	625	645	3.96	0	1060.23	0	6	25	108200	3	718.689	2154.05	0	-0.42	84.42	7249	7249	MS2	30/72	30	72	AC3.RAW
High	D	2	DFDEPGHLAPTGLFLAGTK	13920	Unambiguous	genomic_reference:SL2.31ch12 evidence_code:10F0H1E0IEG gene_region:45136185-45136828 functional_description:"Profilin (AHRD V1 ***- Q9SMC0_TOBAC); contains Interpro domain(s) IPR005455 Profilin, plant "	1	1	Solyc12g044630.1.1		CID	1	0	1	1	0	8.56e-07	597	598	3.39	0	1513.62	0	18	18	2575000	3	662.671	1986	0	1.13	48.61	4377	4377	MS2	30/72	30	72	AH2.RAW
High	D	2	NPSADmLLTPAELNLDLIR	17113	Unambiguous	genomic_reference:SL2.31ch06 evidence_code:10F1H1E1IEG gene_region:41485353-41487653 functional_description:"Fructokinase-like (AHRD V1 **-* Q307Z3_SOLTU); contains Interpro domain(s) IPR002173 Carbohydrate/puine kinase, PfkB, conserved site "	1	1	Solyc06g073190.1.1	M6(Oxidation)	CID	1	0	1	1	0	4.21e-07	552	488	3.95	0	1590.97	0	9	25	764400	3	704.705	2112.1	0	-0.07	61.43	5443	5443	MS2	30/72	30	72	AH2.RAW
High	G	2	NPSADMLLTPAELNLDLIR	17113	Unambiguous	genomic_reference:SL2.31ch06 evidence_code:10F1H1E1IEG gene_region:41485353-41487653 functional_description:"Fructokinase-like (AHRD V1 **-* Q307Z3_SOLTU); contains Interpro domain(s) IPR002173 Carbohydrate/puine kinase, PfkB, conserved site "	1	1	Solyc06g073190.1.1		CID	1	0	1	1	0	3.15e-16	428	450	3.68	0	1541.48	0	22	25	1152000	3	699.374	2096.11	0	0.42	66.65	5972	5972	MS2	30/72	30	72	EAC2.RAW
High	G	2	TIELLDELVEAGSENMNVK	61369	Unambiguous	genomic_reference:SL2.31ch01 evidence_code:10F1H1E1IEG gene_region:74679334-74687600 functional_description:"T-complex protein theta subunit (AHRD V1 ***- A8IF08_CHLRE); contains Interpro domain(s) IPR012721 T-complex protein 1, theta subunit "	1	1	Solyc01g088080.1.1		CID	1	0	1	1	0	3.15e-16	590	599	3.25	0	1172.28	0	36	25	241100	3	702.022	2104.05	0	2.32	69.11	6175	6175	MS2	30/72	30	72	EAC2.RAW
High	H	2	DQDFIEATREPGITFLAAK	36091	Unambiguous	genomic_reference:SL2.31ch07 evidence_code:10F1H1E1IEG gene_region:57715151-57720088 functional_description:"Aspartic proteinase (AHRD V1 **-* Q96383_CENCA); contains Interpro domain(s) IPR001461 Peptidase A1 "	1	1	Solyc07g051850.1.1		CID	1	0	1	1	0	4.46e-05	633	631	3.23	0	1458.7	1	29	25	750000	3	708.032	2122.08	0	0.58	51.2	4715	4715	MS2	30/72	30	72	EAC3_150410225534.RAW
High	J	2	LLALIDDIYKYVDDVVEGR	65732	Unambiguous	genomic_reference:SL2.31ch11 evidence_code:10F1H1E1IEG gene_region:6453695-6462103 functional_description:"Eukaryotic translation initiation factor 3 subunit 5 (AHRD V1 ***- B4FRD9_MAIZE); contains Interpro domain(s) IPR000555 Mov34/MPN/PAD-1 "	1	1	Solyc11g013440.1.1		CID	1	0	1	1	0	0.000123	442	429	4.06	0	1265.01	1	0	25	117200	3	737.064	2209.18	0	0.57	98.07	8733	8733	MS2	30/72	30	72	EAH1.RAW
High	L	2	GLDVDSLYITHIQVNQAQK	12752	Unambiguous	genomic_reference:SL2.31ch06 evidence_code:10F1H1E1IEG gene_region:40675222-40676007 functional_description:"60S ribosomal protein L17 (AHRD V1 ***- D7KV33_ARALY); contains Interpro domain(s) IPR005721 Ribosomal protein L22/L17, eukaryotic/archaeal "	2	1	Solyc06g071880.1.1		CID	1	0	1	1	0	3.19e-16	543	510	3.58	0	1168.39	0	18	25	311800	3	714.711	2142.12	0	-0.79	47.83	4400	4400	MS2	30/72	30	72	EAH4.RAW
High	L	2	NPSADmLLTPAELNLDLIR	17113	Unambiguous	genomic_reference:SL2.31ch06 evidence_code:10F1H1E1IEG gene_region:41485353-41487653 functional_description:"Fructokinase-like (AHRD V1 **-* Q307Z3_SOLTU); contains Interpro domain(s) IPR002173 Carbohydrate/puine kinase, PfkB, conserved site "	1	1	Solyc06g073190.1.1	M6(Oxidation)	CID	1	0	1	1	0	3.19e-16	536	477	3.36	0	1657.4	0	21	25	519900	3	704.706	2112.1	0	1.66	65.35	5891	5891	MS2	30/72	30	72	EAH4.RAW
High	B	2	TGEVIAHIAEGDAEDINR	9176	Unambiguous	genomic_reference:SL2.31ch05 evidence_code:10F0H1E1IEG gene_region:514677-518827 functional_description:"Aldehyde dehydrogenase 1 (AHRD V1 **** Q84V96_LOTCO); contains Interpro domain(s) IPR015590 Aldehyde dehydrogenase "	1	1	Solyc05g005700.1.1		CID	1	0	1	1	0	5.67e-07	542	612	3.79	0	1810.62	0	11	25	1400000	3	637.313	1909.92	0	-1.04	33.39	3127	3127	MS2	30/68	30	68	AC2.RAW
High	B	2	MIQAVDDMLSHDIPELLK	17096	Unambiguous	genomic_reference:SL2.31ch11 evidence_code:10F0H1E1IEG gene_region:4963684-4968355 functional_description:"EH-domain-containing protein 1 (AHRD V1 **-* B6U193_MAIZE); contains Interpro domain(s) IPR001401 Dynamin, GTPase region "	1	1	Solyc11g012020.1.1		CID	1	0	1	1	0	2.03e-06	555	592	4.46	0	1205.5	0	23	25	278900	3	690.02	2068.05	0	0.21	66.81	5943	5943	MS2	30/68	30	68	AC2.RAW
High	C	2	EDEERLDEVGYDDVGGVR	30214	Unambiguous	genomic_reference:SL2.31ch06 evidence_code:10F1H1E1IEG gene_region:42870601-42877193 functional_description:"26S protease regulatory subunit 6B homolog (AHRD V1 *--- PRS6B_ARATH); contains Interpro domain(s) IPR005938 ATPase, AAA-type, CDC48 "|genomic_reference:SL2.31ch11 evidence_code:10F1H1E1IEG gene_region:51411308-51416865 functional_description:"26S protease regulatory subunit 6B homolog (AH…	2	2	Solyc06g074980.1.1;Solyc11g069720.1.1		CID	1	0	1	1	0	1.55e-05	334	309	3.73	0	1601.7	1	36	25	545100	3	684.644	2051.92	0	0.82	28.59	2692	2692	MS2	30/68	30	68	AC3.RAW
High	C	2	YAADEDAFFADYAEAHLK	14432	Unambiguous	genomic_reference:SL2.31ch06 evidence_code:10F1H1E1IEG gene_region:182627-184940 functional_description:"Ascorbate peroxidase (AHRD V1 ***- Q9SMD3_SOLLC); contains Interpro domain(s) IPR019793 Peroxidases heam-ligand binding site IPR019794 Peroxidase, active site IPR002016 Haem peroxidase, plant/fungal/bacterial "	2	1	Solyc06g005160.1.1		CID	1	0	1	1	0	3.92e-10	292	280	3.38	0	710.09	0	16	25	1935000	3	682.974	2046.91	0	0.07	50.73	4588	4588	MS2	30/68	30	68	AC3.RAW
High	C	2	HTDVLDAITQHLEIGSYR	38215	Unambiguous	genomic_reference:SL2.31ch07 evidence_code:10F1H1E1IEG gene_region:62455643-62461072 functional_description:"Phosphoenolpyruvate carboxylase 2 (AHRD V1 ***- Q9SCB2_SOLLC); contains Interpro domain(s) IPR015813 Pyruvate/Phosphoenolpyruvate kinase, catalytic core IPR001449 Phosphoenolpyruvate carboxylase "	3	1	Solyc07g062530.1.1		CID	1	0	1	1	0	1.28e-10	583	606	4.35	0	1486.86	0	11	25	1281000	3	690.021	2068.05	0	0.98	57.18	5121	5121	MS2	30/68	30	68	AC3.RAW
High	C	2	QLEEAEIDAIVAEIEAEK	19072	Unambiguous	genomic_reference:SL2.31ch01 evidence_code:10F1H1E1IEG gene_region:89447148-89449678 functional_description:"Proteasome subunit alpha type (AHRD V1 ***- Q38HT8_SOLTU); contains Interpro domain(s) IPR000426 Proteasome, alpha-subunit, conserved site "	1	1	Solyc01g111450.1.1		CID	1	0	1	1	0	2.24e-08	579	583	4.58	0	1988.67	0	18	25	130700	3	667.341	2000.01	0	0.58	70.44	6198	6198	MS2	30/68	30	68	AC3.RAW
High	D	2	YAADEDAFFADYAEAHLK	14432	Unambiguous	genomic_reference:SL2.31ch06 evidence_code:10F1H1E1IEG gene_region:182627-184940 functional_description:"Ascorbate peroxidase (AHRD V1 ***- Q9SMD3_SOLLC); contains Interpro domain(s) IPR019793 Peroxidases heam-ligand binding site IPR019794 Peroxidase, active site IPR002016 Haem peroxidase, plant/fungal/bacterial "	2	1	Solyc06g005160.1.1		CID	1	0	1	1	0	9.68e-08	295	279	3.77	0	707.37	0	18	25	2022000	3	682.974	2046.91	0	0.16	50.24	4513	4513	MS2	30/68	30	68	AH2.RAW
High	D	2	LASLADLYVNDAFGTAHR	14688	Unambiguous	genomic_reference:SL2.31ch07 evidence_code:10F1H1E1IEG gene_region:65212571-65215004 functional_description:"Phosphoglycerate kinase (AHRD V1 ***- Q2VCK2_SOLTU); contains Interpro domain(s) IPR001576 Phosphoglycerate kinase "|genomic_reference:SL2.31ch07 evidence_code:10F1H1E1IEG gene_region:65216681-65218656 functional_description:"Phosphoglycerate kinase (AHRD V1 ***- O81394_SOLTU); contains In…	2	2	Solyc07g066600.1.1;Solyc07g066610.1.1		CID	1	0	1	1	0	3.45e-07	624	669	3.17	0	1046.87	0	4	18	2289000	3	645.331	1933.98	0	0.21	50.98	4575	4575	MS2	30/68	30	68	AH2.RAW
High	E	2	mDADYGIARELSDLQKLR	100397	Unambiguous	genomic_reference:SL2.31ch12 evidence_code:10F1H1E1IEG gene_region:63232222-63238853 functional_description:"Diphosphate--fructose-6-phosphate 1-phosphotransferase (AHRD V1 ***- C8PT93_9SPIO); contains Interpro domain(s) IPR011183 Pyrophosphate-dependent phosphofructokinase PfpB "	2	1	Solyc12g095760.1.1	N-Term(Acetyl)	CID	1	0	1	1	0	0.00311	623	591	3.7	0	1259.96	2	32	25	196900	3	712.697	2136.08	0	0.14	70.03	6200	6200	MS2	30/68	30	68	AH3.RAW
High	F	2	QLEEAEIDAIVAEIEAEK	19072	Unambiguous	genomic_reference:SL2.31ch01 evidence_code:10F1H1E1IEG gene_region:89447148-89449678 functional_description:"Proteasome subunit alpha type (AHRD V1 ***- Q38HT8_SOLTU); contains Interpro domain(s) IPR000426 Proteasome, alpha-subunit, conserved site "	1	1	Solyc01g111450.1.1		CID	1	0	1	1	0	8.81e-12	589	591	4.33	0	1878.32	0	14	25	52580	3	667.341	2000.01	0	0.3	74.52	6667	6667	MS2	30/68	30	68	AH4.RAW
High	K	2	DLFELLPQAIQEQLLLER	21200	Unambiguous	genomic_reference:SL2.31ch07 evidence_code:10F0H1E1IEG gene_region:56860793-56868027 functional_description:"Diphosphate-fructose-6-phosphate 1-phosphotransferase (AHRD V1 ***- D0TAW1_9BACE); contains Interpro domain(s) IPR011183 Pyrophosphate-dependent phosphofructokinase PfpB "	1	1	Solyc07g049280.1.1		CID	1	0	1	1	0	1.54e-07	219	231	3.18	0	1446.88	0	28	25	104400	3	723.404	2168.2	0	1.13	85.83	7580	7580	MS2	30/68	30	68	EAH2.RAW
High	L	2	NELTALHPDDPNIVVYER	114632	Unambiguous	genomic_reference:SL2.31ch10 evidence_code:10F0H1E0IEG gene_region:59818291-59826245 functional_description:"Protein phosphatase 2C (AHRD V1 *-*- B6T5D8_MAIZE); contains Interpro domain(s) IPR015655 Protein phosphatase 2C "	1	1	Solyc10g078800.1.1		CID	1	0	1	1	0	3.19e-16	646	681	3.19	0	1022.5	0	27	25	130300	3	699.021	2095.05	0	0.77	40.64	3784	3784	MS2	30/68	30	68	EAH4.RAW
High	A	2	EDIAIVLISQYVANMIR	21219	Unambiguous	genomic_reference:SL2.31ch02 evidence_code:10F1H1E1IEG gene_region:32972773-32977550 functional_description:"Vacuolar ATPase F subunit (AHRD V1 **** B8Y6I1_HEVBR); contains Interpro domain(s) IPR005772 ATPase, V1 complex, subunit F, eukaryotic "	1	1	Solyc02g068450.1.1		CID	1	0	1	1	0	9.97e-09	356	383	4.41	0	1475.48	0	0	25	49030	3	650.025	1948.06	0	1.18	97.35	8438	8438	MS2	30/64	30	64	AC1.RAW
High	C	2	EDIAIVLISQYVANMIR	21219	Unambiguous	genomic_reference:SL2.31ch02 evidence_code:10F1H1E1IEG gene_region:32972773-32977550 functional_description:"Vacuolar ATPase F subunit (AHRD V1 **** B8Y6I1_HEVBR); contains Interpro domain(s) IPR005772 ATPase, V1 complex, subunit F, eukaryotic "	1	1	Solyc02g068450.1.1		CID	1	0	1	1	0	1.57e-09	368	393	4.75	0	1930.18	0	5	25	123900	3	650.024	1948.06	0	0.62	97.25	8221	8221	MS2	30/64	30	64	AC3.RAW
High	F	2	DRYIPDDAmIEGSHGLR	7045	Unambiguous	genomic_reference:SL2.31ch10 evidence_code:10F0H1E0IEG gene_region:64082694-64085929 functional_description:"Beta-fructofuranosidase insoluble isoenzyme 2 (AHRD V1 **-* B6U1H5_MAIZE); contains Interpro domain(s) IPR001362 Glycoside hydrolase, family 32 "	1	1	Solyc10g085640.1.1	M9(Oxidation)	CID	1	0	1	1	0	9.87e-10	462	409	4.5	0	896.5	1	41	25	604900	3	654.312	1960.92	0	0.9	27.46	2631	2631	MS2	30/64	30	64	AH4.RAW
High	K	2	DRYIPDDAmIEGSHGLR	7045	Unambiguous	genomic_reference:SL2.31ch10 evidence_code:10F0H1E0IEG gene_region:64082694-64085929 functional_description:"Beta-fructofuranosidase insoluble isoenzyme 2 (AHRD V1 **-* B6U1H5_MAIZE); contains Interpro domain(s) IPR001362 Glycoside hydrolase, family 32 "	1	1	Solyc10g085640.1.1	M9(Oxidation)	CID	1	0	1	1	0	5.18e-07	469	431	4.08	0	1260.82	1	41	25	1083000	3	654.311	1960.92	0	-0.31	26.26	2518	2518	MS2	30/64	30	64	EAH2.RAW
High	A	2	YPIEHGIVSNWDDMEK	9134	Unambiguous	genomic_reference:SL2.31ch03 evidence_code:10F1H1E1IEG gene_region:44382119-44383552 functional_description:"Actin (AHRD V1 ***- Q7XZJ2_GOSHI); contains Interpro domain(s) IPR004000 Actin/actin-like "|genomic_reference:SL2.31ch10 evidence_code:10F1H1E1IEG gene_region:61080001-61081737 functional_description:"Actin (AHRD V1 ***- B5M4V6_TOBAC); contains Interpro domain(s) IPR004000 Actin/actin-like…	8	4	Solyc03g078400.1.1;Solyc01g104770.1.1;Solyc06g076090.1.1;Solyc11g065990.1.1		CID	1	0	1	1	0	1.71e-08	369	358	3.99	0	1659.9	0	12	20	2439000	3	644.965	1932.88	0	0.13	40.34	3703	3703	MS2	30/60	30	60	AC1.RAW
High	F	2	SLIDHSVVESFGDGGK	9796	Unambiguous	genomic_reference:SL2.31ch10 evidence_code:10F0H1E0IEG gene_region:64087278-64090125 functional_description:"Beta-fructofuranosidase insoluble isoenzyme 2 (AHRD V1 **-- B6U1H5_MAIZE); contains Interpro domain(s) IPR001362 Glycoside hydrolase, family 32 "	1	1	Solyc10g085650.1.1		CID	1	0	1	1	0	9.42e-09	522	503	3.98	0	2069.92	0	23	21	2299000	3	549.606	1646.8	0	0.5	36.91	3494	3494	MS2	30/60	30	60	AH4.RAW
High	J	2	DAEGQDVLLFIDNIFR	21694	Unambiguous	genomic_reference:SL2.31ch02 evidence_code:10F0H1E0IEG gene_region:47123903-47126760 functional_description:"ATP synthase subunit beta (AHRD V1 ***- Q9ZR78_NICSY); contains Interpro domain(s) IPR005722 ATPase, F1 complex, beta subunit "|genomic_reference:SL2.31ch04 evidence_code:10F1H1E1IEG gene_region:1237570-1241219 functional_description:"ATP synthase subunit beta (AHRD V1 ***- O82722_NICSY); …	3	3	Solyc02g091130.1.1;Solyc04g007550.1.1;Solyc05g008460.1.1		CID	1	0	1	1	0	8.65e-06	674	648	5.58	0	1789.49	0	8	25	410600	3	622.32	1864.94	0	0.27	93.04	8322	8322	MS2	30/60	30	60	EAH1.RAW
High	L	2	APIFLGSYDDVEEIKR	11884	Unambiguous	genomic_reference:SL2.31ch12 evidence_code:10F1H1E1IEG gene_region:47839572-47843112 functional_description:"Fructose-1 6-bisphosphatase class 1 (AHRD V1 ***- B8J024_DESDA); contains Interpro domain(s) IPR000146 Fructose-1,6-bisphosphatase "	1	1	Solyc12g056530.1.1		CID	1	0	1	1	0	3.19e-16	589	567	3.62	0	1144.07	1	22	25	204300	3	617.988	1851.95	0	1.01	44.62	4127	4127	MS2	30/60	30	60	EAH4.RAW
High	A	2	IALTDNAVIEQVLGK	16129	Unambiguous	genomic_reference:SL2.31ch08 evidence_code:10F0H1E1IEG gene_region:56410678-56415449 functional_description:"60S ribosomal protein L7 (AHRD V1 *-*- D7MY49_ARALY); contains Interpro domain(s) IPR005998 Ribosomal protein L7, eukaryotic "	1	1	Solyc08g075090.1.1		CID	1	0	1	1	0	4.53e-06	298	259	3.54	0	1683.94	0	9	25	698900	3	528.639	1583.9	0	0.57	58.43	5226	5226	MS2	30/56	30	56	AC1.RAW
High	E	2	LGDDEFGHMLAGILK	7862	Unambiguous	genomic_reference:SL2.31ch06 evidence_code:10F1H1E1IEG gene_region:41485353-41487653 functional_description:"Fructokinase-like (AHRD V1 **-* Q307Z3_SOLTU); contains Interpro domain(s) IPR002173 Carbohydrate/puine kinase, PfkB, conserved site "	1	1	Solyc06g073190.1.1		CID	1	0	1	1	0	0.00012	562	595	3.67	0	740.2	0	61	25	695900	3	539.277	1615.82	0	0.66	69.52	6159	6159	MS2	30/56	30	56	AH3.RAW
High	F	2	LGDDEFGHmLAGILK	7862	Unambiguous	genomic_reference:SL2.31ch06 evidence_code:10F1H1E1IEG gene_region:41485353-41487653 functional_description:"Fructokinase-like (AHRD V1 **-* Q307Z3_SOLTU); contains Interpro domain(s) IPR002173 Carbohydrate/puine kinase, PfkB, conserved site "	1	1	Solyc06g073190.1.1	M9(Oxidation)	CID	1	0	1	1	0	3.53e-08	556	580	3.43	0	1010.59	0	5	25	1017000	3	544.608	1631.81	0	0.48	50.39	4665	4665	MS2	30/56	30	56	AH4.RAW
High	K	2	IYDNmQKPAFVFDGR	8491	Unambiguous	genomic_reference:SL2.31ch03 evidence_code:10F0H1E1IEG gene_region:59159981-59161423 functional_description:"UDP-glucose dehydrogenase (AHRD V1 **** B1N754_EUCGR); contains Interpro domain(s) IPR014028 UDP-glucose/GDP-mannose dehydrogenase, dimerisation and substrate-binding "	2	1	Solyc03g115380.1.1	M5(Oxidation)	CID	1	0	1	1	0	5.47e-07	499	481	3.69	0	1018.16	0	13	16	2011000	3	606.294	1816.87	0	-0.01	30.79	2927	2927	MS2	30/56	30	56	EAH2.RAW
High	C	2	HLVQWPIEELETLR	17159	Unambiguous	genomic_reference:SL2.31ch10 evidence_code:10F0H1E0IEG gene_region:64082694-64085929 functional_description:"Beta-fructofuranosidase insoluble isoenzyme 2 (AHRD V1 **-* B6U1H5_MAIZE); contains Interpro domain(s) IPR001362 Glycoside hydrolase, family 32 "	1	1	Solyc10g085640.1.1		CID	1	0	1	1	0	3.21e-08	446	455	4.7	0	3326.07	0	6	25	248600	3	588.321	1762.95	0	0.54	61.1	5440	5440	MS2	30/52	30	52	AC3.RAW
High	J	2	SFQFVSDLVEGLMR	19123	Unambiguous	genomic_reference:SL2.31ch09 evidence_code:10F1H1E1IEG gene_region:62424091-62427659 functional_description:"Bifunctional polymyxin resistance protein ArnA (AHRD V1 **-- ARNA_SALDC); contains Interpro domain(s) IPR016040 NAD(P)-binding domain "|genomic_reference:SL2.31ch12 evidence_code:10F0H1E0IEG gene_region:64958188-64961842 functional_description:"Bifunctional polymyxin resistance protein Arn…	2	1	Solyc12g099480.1.1		CID	1	0	1	1	0	0.000228	553	534	3.76	0	2347.07	0	11	25	70120	3	543.277	1627.82	0	0.43	86.47	7764	7764	MS2	30/52	30	52	EAH1.RAW
High	A	2	FRTDLPTGGLANVASTFMNLHGYEAPSDYEPTLIEVVDN	20651	Unambiguous	genomic_reference:SL2.31ch07 evidence_code:10F1H1E1IEG gene_region:55219265-55224407 functional_description:"2 3-bisphosphoglycerate-independent phosphoglycerate mutase (AHRD V1 **** B9S1V6_RICCO); contains Interpro domain(s) IPR005995 Phosphoglycerate mutase, 2,3-bisphosphoglycerate-independent "	1	1	Solyc07g044840.1.1		CID	1	0	1	1	0	0.000398	625	587	3.95	0	545.47	1	0	25	145500	3	1418.68	4254.03	0	-1.57	79.72	6973	6973	MS2	30/152	30	152	AC1.RAW
High	E	2	FRTDLPTGGLANVASTFmNLHGYEAPSDYEPTLIEVVDN	20651	Unambiguous	genomic_reference:SL2.31ch07 evidence_code:10F1H1E1IEG gene_region:55219265-55224407 functional_description:"2 3-bisphosphoglycerate-independent phosphoglycerate mutase (AHRD V1 **** B9S1V6_RICCO); contains Interpro domain(s) IPR005995 Phosphoglycerate mutase, 2,3-bisphosphoglycerate-independent "	1	1	Solyc07g044840.1.1	M18(Oxidation)	CID	1	0	1	1	0	0.0255	639	637	3.46	0	520.76	1	3	25	148500	3	1424.01	4270.02	0	-2.15	77.9	6860	6860	MS2	30/152	30	152	AH3.RAW
High	K	2	FRTDLPTGGLANVASTFMNLHGYEAPSDYEPTLIEVVDN	20651	Unambiguous	genomic_reference:SL2.31ch07 evidence_code:10F1H1E1IEG gene_region:55219265-55224407 functional_description:"2 3-bisphosphoglycerate-independent phosphoglycerate mutase (AHRD V1 **** B9S1V6_RICCO); contains Interpro domain(s) IPR005995 Phosphoglycerate mutase, 2,3-bisphosphoglycerate-independent "	1	1	Solyc07g044840.1.1		CID	1	0	1	1	0	0.000497	639	602	3.72	0	518.91	1	0	25	239100	3	1418.68	4254.04	0	0.49	79.91	7091	7091	MS2	30/152	30	152	EAH2.RAW
High	B	2	NPAYPDTLYVDPLIGPDTVSTmPDQALQAFIDHGSVAR	19456	Unambiguous	genomic_reference:SL2.31ch00 evidence_code:10F1H1E1IEG gene_region:5777009-5780213 functional_description:"Transaldolase (AHRD V1 ***- Q9FVH1_SOLLC); contains Interpro domain(s) IPR014634 Transaldolase, bacterial/plant type "	1	1	Solyc00g006800.1.1	M22(Oxidation)	CID	1	0	1	1	0	3.15e-06	665	614	3.63	0	409.9	0	6	25	227600	3	1367.67	4101	0	1.43	71.25	6306	6306	MS2	30/148	30	148	AC2.RAW
High	E	2	NPAYPDTLYVDPLIGPDTVSTmPDQALQAFIDHGSVAR	19456	Unambiguous	genomic_reference:SL2.31ch00 evidence_code:10F1H1E1IEG gene_region:5777009-5780213 functional_description:"Transaldolase (AHRD V1 ***- Q9FVH1_SOLLC); contains Interpro domain(s) IPR014634 Transaldolase, bacterial/plant type "	1	1	Solyc00g006800.1.1	M22(Oxidation)	CID	1	0	1	1	0	0.0118	654	609	3.03	0	385.3	0	3	25	89320	3	1367.67	4101	0	1.43	78	6868	6868	MS2	30/148	30	148	AH3.RAW
High	B	2	VGDGFTEGVEQGPLINEAAVQKVEYFVDEATSK	42128	Unambiguous	genomic_reference:SL2.31ch09 evidence_code:10F1H1E1IEG gene_region:65491459-65493027 functional_description:"Succinate semialdehyde dehydrogenase (AHRD V1 **** B6TPI6_MAIZE); contains Interpro domain(s) IPR015590 Aldehyde dehydrogenase "	1	1	Solyc09g090700.1.1		CID	1	0	1	1	0	2.48e-05	624	665	4.98	0	701.85	1	24	25	134900	3	1176.25	3526.72	0	0.54	75.86	6696	6696	MS2	30/128	30	128	AC2.RAW
High	G	2	IVGLHQVTSITSTDITDTWEPLEEGLLPLETTR	20070	Unambiguous	genomic_reference:SL2.31ch04 evidence_code:10F0H1E1IEG gene_region:63334558-63338261 functional_description:"Ribonuclease P protein subunit p25 (AHRD V1 *--- RPP25_RAT); contains Interpro domain(s) IPR002775 Alba, DNA/RNA-binding protein "	1	1	Solyc04g081880.1.1		CID	1	0	1	1	0	2.78e-10	415	388	3.08	0	503.96	0	3	25	564100	3	1222.3	3664.89	0	-1.48	75.2	6676	6676	MS2	30/128	30	128	EAC2.RAW
High	I	2	ILLTSTSEVYGDPLIHPQDESYWGNVNPIGVR	16765	Unambiguous	genomic_reference:SL2.31ch04 evidence_code:10F1H1E1IEG gene_region:3868903-3871560 functional_description:"UDP-glucose 4-epimerase (AHRD V1 **-* D5RML8_9PROT); contains Interpro domain(s) IPR016040 NAD(P)-binding domain "	1	1	Solyc04g011400.1.1		CID	1	0	1	1	0	0.000175	581	588	3.1	0	442.27	0	2	25	405500	3	1190.6	3569.79	0	1.03	61.57	5601	5601	MS2	30/124	30	124	EAC4_150411011441.RAW
High	L	2	ILLTSTSEVYGDPLIHPQDESYWGNVNPIGVR	16765	Unambiguous	genomic_reference:SL2.31ch04 evidence_code:10F1H1E1IEG gene_region:3868903-3871560 functional_description:"UDP-glucose 4-epimerase (AHRD V1 **-* D5RML8_9PROT); contains Interpro domain(s) IPR016040 NAD(P)-binding domain "	1	1	Solyc04g011400.1.1		CID	1	0	1	1	0	3.19e-16	588	594	4.35	0	884.04	0	1	25	638500	3	1190.6	3569.8	0	1.13	65.02	5861	5861	MS2	30/124	30	124	EAH4.RAW
High	F	2	WNYDGSSTGQASGEDSEVILYPQAIFKDPFR	18035	Unambiguous	genomic_reference:SL2.31ch05 evidence_code:10F0H1E1IEG gene_region:60677361-60680424 functional_description:"Glutamine synthetase (AHRD V1 ***- A9PB10_POPTR); contains Interpro domain(s) IPR008146 Glutamine synthetase, catalytic region "	1	1	Solyc05g051250.1.1		CID	1	0	1	1	0	7.11e-07	596	559	4.69	0	810.19	1	0	25	154300	3	1159.88	3477.62	0	0.04	69.22	6236	6236	MS2	30/120	30	120	AH4.RAW
High	K	2	WNYDGSSTGQASGEDSEVILYPQAIFKDPFR	18035	Unambiguous	genomic_reference:SL2.31ch05 evidence_code:10F0H1E1IEG gene_region:60677361-60680424 functional_description:"Glutamine synthetase (AHRD V1 ***- A9PB10_POPTR); contains Interpro domain(s) IPR008146 Glutamine synthetase, catalytic region "	1	1	Solyc05g051250.1.1		CID	1	0	1	1	0	9.64e-05	609	581	4.66	0	798.33	1	0	25	720800	3	1159.88	3477.63	0	1.62	65.74	5921	5921	MS2	30/120	30	120	EAH2.RAW
High	B	2	MANDSVGPEVENLVAGLPEGGVVLLENVR	20218	Unambiguous	genomic_reference:SL2.31ch07 evidence_code:10F1H1E1IEG gene_region:65212571-65215004 functional_description:"Phosphoglycerate kinase (AHRD V1 ***- Q2VCK2_SOLTU); contains Interpro domain(s) IPR001576 Phosphoglycerate kinase "	1	1	Solyc07g066600.1.1		CID	1	0	1	1	0	5.83e-06	517	547	3.36	0	772.95	0	0	25	1011000	3	993.182	2977.53	0	0.77	77.96	6873	6873	MS2	30/112	30	112	AC2.RAW
High	C	2	YGQDATNVGDEGGFAPNIQENKEGLELLK	12881	Unambiguous	genomic_reference:SL2.31ch09 evidence_code:10F1H1E1IEG gene_region:2371333-2375783 functional_description:"Enolase (AHRD V1 ***- C5J0G6_TOBAC); contains Interpro domain(s) IPR000941 Enolase "|genomic_reference:SL2.31ch10 evidence_code:10F1H1E1IEG gene_region:63994775-63999383 functional_description:"Enolase (AHRD V1 ***- C5J0G6_TOBAC); contains Interpro domain(s) IPR000941 Enolase "	2	2	Solyc09g009020.1.1;Solyc10g085550.1.1		CID	1	0	1	1	0	2.62e-07	658	711	4.19	0	616.59	1	2	25	3292000	3	1036.17	3106.5	0	0.05	45.49	4153	4153	MS2	30/112	30	112	AC3.RAW
High	C	2	YILENFTGDSLDGIKEQEVGEFDPPSEVR	16000	Unambiguous	genomic_reference:SL2.31ch04 evidence_code:10F1H1E1IEG gene_region:59591250-59595247 functional_description:"Xylulose kinase (AHRD V1 ***- D7MPD2_ARALY); contains Interpro domain(s) IPR000577 Carbohydrate kinase, FGGY "	1	1	Solyc04g077040.1.1		CID	1	0	1	1	0	5.92e-05	666	742	3.46	0	691.78	1	0	25	739000	3	1095.19	3283.56	0	-0.28	56.75	5085	5085	MS2	30/112	30	112	AC3.RAW
High	D	2	VSDVELEFLTGSNKIDDESAmSLWHPNLK	16510	Unambiguous	genomic_reference:SL2.31ch06 evidence_code:10F1H1E1IEG gene_region:41485353-41487653 functional_description:"Fructokinase-like (AHRD V1 **-* Q307Z3_SOLTU); contains Interpro domain(s) IPR002173 Carbohydrate/puine kinase, PfkB, conserved site "	1	1	Solyc06g073190.1.1	M21(Oxidation)	CID	1	0	1	1	0	7.74e-06	713	695	3.95	0	728.61	1	3	25	278900	3	1097.54	3290.59	0	1.12	58.25	5179	5179	MS2	30/112	30	112	AH2.RAW
High	G	2	YILENFTGDSLDGIKEQEVGEFDPPSEVR	16000	Unambiguous	genomic_reference:SL2.31ch04 evidence_code:10F1H1E1IEG gene_region:59591250-59595247 functional_description:"Xylulose kinase (AHRD V1 ***- D7MPD2_ARALY); contains Interpro domain(s) IPR000577 Carbohydrate kinase, FGGY "	1	1	Solyc04g077040.1.1		CID	1	0	1	1	0	1.1e-12	662	748	3.71	0	672.79	1	3	25	746400	3	1095.19	3283.57	0	0.27	56.2	5107	5107	MS2	30/112	30	112	EAC2.RAW
High	G	2	VSDVELEFLTGSNKIDDESAMSLWHPNLK	16510	Unambiguous	genomic_reference:SL2.31ch06 evidence_code:10F1H1E1IEG gene_region:41485353-41487653 functional_description:"Fructokinase-like (AHRD V1 **-* Q307Z3_SOLTU); contains Interpro domain(s) IPR002173 Carbohydrate/puine kinase, PfkB, conserved site "	1	1	Solyc06g073190.1.1		CID	1	0	1	1	0	3.15e-16	765	635	5.1	0	1009.37	1	3	25	1050000	3	1092.2	3274.59	0	-1.36	62.42	5624	5624	MS2	30/112	30	112	EAC2.RAW
High	J	2	VSDVELEFLTGSNKIDDESAmSLWHPNLK	16510	Unambiguous	genomic_reference:SL2.31ch06 evidence_code:10F1H1E1IEG gene_region:41485353-41487653 functional_description:"Fructokinase-like (AHRD V1 **-* Q307Z3_SOLTU); contains Interpro domain(s) IPR002173 Carbohydrate/puine kinase, PfkB, conserved site "	1	1	Solyc06g073190.1.1	M21(Oxidation)	CID	1	0	1	1	0	0.0203	722	685	3.75	0	751.93	1	8	25	722900	3	1097.54	3290.6	0	4.46	60.3	5597	5597	MS2	30/112	30	112	EAH1.RAW
High	J	2	ALDWGPGGGPDLIVDDGGDATLLIHEGVK	17031	Unambiguous	genomic_reference:SL2.31ch09 evidence_code:10F0H1E1IEG gene_region:66849902-66851909 functional_description:"Adenosylhomocysteinase (AHRD V1 **** Q2XTD0_SOLTU); contains Interpro domain(s) IPR000043 S-adenosyl-L-homocysteine hydrolase "|genomic_reference:SL2.31ch12 evidence_code:10F0H1E1IEG gene_region:64330367-64332543 functional_description:"Adenosylhomocysteinase (AHRD V1 ***- A1KYB0_TOBAC); c…	3	2	Solyc09g092390.1.1;Solyc12g098500.1.1		CID	1	0	1	1	0	3.2e-05	691	639	3.44	0	425.86	0	25	25	3570000	3	963.155	2887.45	0	0.64	62.59	5792	5792	MS2	30/112	30	112	EAH1.RAW
High	E	2	YAAISQDNGLVPIVEPEILLDGDHPIER	17490	Unambiguous	genomic_reference:SL2.31ch05 evidence_code:10F1H1E1IEG gene_region:2917196-2920087 functional_description:"Fructose-bisphosphate aldolase (AHRD V1 ***- B9SJY9_RICCO); contains Interpro domain(s) IPR000741 Fructose-bisphosphate aldolase, class-I "	1	1	Solyc05g008600.1.1		CID	1	0	1	1	0	0.00165	493	477	3.15	0	500.36	0	7	25	328800	3	1025.2	3073.59	0	0.83	68.98	6115	6115	MS2	30/108	30	108	AH3.RAW
High	A	2	SSHLPLTQYDNAmDTDSLNPGEQIFEK	12722	Unambiguous	genomic_reference:SL2.31ch06 evidence_code:10F0H1E1IEG gene_region:38097754-38102045 functional_description:"Hexokinase (AHRD V1 ***- Q9FR27_SOLLC); contains Interpro domain(s) IPR001312 Hexokinase "	1	1	Solyc06g066440.1.1	M13(Oxidation)	CID	1	0	1	1	0	5.05e-06	551	536	3.65	0	654.49	0	12	25	792900	3	1022.81	3066.41	0	2.29	45.88	4172	4172	MS2	30/104	30	104	AC1.RAW
High	E	2	DKPLPSWSDSDVEEFIASDPLHGPTLR	17453	Unambiguous	genomic_reference:SL2.31ch06 evidence_code:10F1H1E1IEG gene_region:42013245-42016680 functional_description:"Unknown Protein (AHRD V1)"	1	1	Solyc06g073900.1.1		CID	1	0	1	1	0	0.000525	707	710	3.71	0	560.34	0	3	25	492400	3	1003.49	3008.47	0	1.86	68.97	6114	6114	MS2	30/104	30	104	AH3.RAW
High	I	2	VDKGTVELPGTDGETTTQGLDGLAER	10517	Unambiguous	genomic_reference:SL2.31ch09 evidence_code:10F0H1E1IEG gene_region:2645029-2646904 functional_description:"Fructose-bisphosphate aldolase (AHRD V1 ***- Q2PYX3_SOLTU); contains Interpro domain(s) IPR000741 Fructose-bisphosphate aldolase, class-I "	1	1	Solyc09g009260.1.1		CID	1	0	1	1	0	7.14e-06	642	640	4.51	0	839.83	1	4	25	1554000	3	887.108	2659.31	0	0.91	38.25	3598	3598	MS2	30/100	30	100	EAC4_150411011441.RAW
High	J	2	WQSDVEDPHTFVDLFVSNDDPTLLmR	18594	Unambiguous	genomic_reference:SL2.31ch02 evidence_code:10F0H1E1IEG gene_region:32433885-32438634 functional_description:"Genomic DNA chromosome 3 TAC clone K24A2 (AHRD V1 ***- Q9LIJ1_ARATH)"	1	1	Solyc02g067740.1.1	M25(Oxidation)	CID	1	0	1	1	0	0.00582	578	603	4.03	0	1046.05	0	3	25	671000	3	1031.48	3092.43	0	0.99	69.23	6350	6350	MS2	30/100	30	100	EAH1.RAW
High	A	2	ALLAIPTTIADNAGLDSAELIAQLR	20912	Unambiguous	genomic_reference:SL2.31ch11 evidence_code:10F1H1E1IEG gene_region:50651405-50656732 functional_description:"T-complex protein 1 subunit beta (AHRD V1 ***- B6T8X5_MAIZE); contains Interpro domain(s) IPR012716 T-complex protein 1, beta subunit "	1	1	Solyc11g069000.1.1		CID	1	0	1	1	0	2.74e-07	188	192	3.53	0	665.42	0	25	25	165400	3	850.81	2550.41	0	0.18	81.92	7153	7153	MS2	29/96	29	96	AC1.RAW
High	F	2	AEATDVANAVLDGTDAILLGAETLR	21397	Unambiguous	genomic_reference:SL2.31ch09 evidence_code:10F1H1E1IEG gene_region:2260322-2267191 functional_description:"Pyruvate kinase (AHRD V1 ***- A9P7U5_POPTR); contains Interpro domain(s) IPR001697 Pyruvate kinase "|genomic_reference:SL2.31ch10 evidence_code:10F1H1E1IEG gene_region:62809938-62815473 functional_description:"Pyruvate kinase (AHRD V1 ***- Q94KE3_ARATH); contains Interpro domain(s) IPR001697…	2	2	Solyc09g008840.1.1;Solyc10g083720.1.1		CID	1	0	1	1	0	3.52e-07	562	518	3.81	0	1143.25	0	11	25	175000	3	833.77	2499.3	0	1.04	91.35	8071	8071	MS2	29/96	29	96	AH4.RAW
High	G	2	VTYVEDIAEGIESAPGALVGLFSGR	21874	Unambiguous	genomic_reference:SL2.31ch12 evidence_code:10F1H1E1IEG gene_region:63880407-63883958 functional_description:"Alcohol dehydrogenase zinc-containing (AHRD V1 **-- Q5HE18_STAAC); contains Interpro domain(s) IPR002085 Alcohol dehydrogenase superfamily, zinc-containing "	1	1	Solyc12g096760.1.1		CID	1	0	1	1	0	3.15e-16	641	643	3.92	0	1277.61	0	17	25	158100	3	850.775	2550.31	0	0.27	95.26	8333	8333	MS2	29/96	29	96	EAC2.RAW
High	J	2	ALLAIPTTIADNAGLDSAELIAQLR	20912	Unambiguous	genomic_reference:SL2.31ch11 evidence_code:10F1H1E1IEG gene_region:50651405-50656732 functional_description:"T-complex protein 1 subunit beta (AHRD V1 ***- B6T8X5_MAIZE); contains Interpro domain(s) IPR012716 T-complex protein 1, beta subunit "	1	1	Solyc11g069000.1.1		CID	1	0	1	1	0	0.000648	185	189	3.83	0	677.15	0	30	25	357200	3	850.81	2550.42	0	0.83	83.06	7491	7491	MS2	29/96	29	96	EAH1.RAW
High	A	2	FVAPDVSVLNSDSAISEFIEEAGK	19844	Unambiguous	genomic_reference:SL2.31ch11 evidence_code:10F0H1E1IEG gene_region:9781065-9788038 functional_description:"Protein disulfide isomerase (AHRD V1 ***- Q5EUD3_MAIZE); contains Interpro domain(s) IPR013766 Thioredoxin domain "	1	1	Solyc11g019920.1.1		CID	1	0	1	1	0	3.87e-06	685	682	3.93	0	1002.61	0	13	25	245300	3	842.086	2524.24	0	-0.22	74.59	6552	6552	MS2	29/92	29	92	AC1.RAW
High	B	2	SDVSNVVHADEFEYKDPVDGSVSK	9499	Unambiguous	genomic_reference:SL2.31ch04 evidence_code:10F0H1E1IEG gene_region:31641900-31656873 functional_description:"Phosphoglucomutase (AHRD V1 **** Q9AUQ4_ORYSA); contains Interpro domain(s) IPR016055 Alpha-D-phosphohexomutase, alpha/beta/alpha I, II and III "	1	1	Solyc04g045340.1.1		CID	1	0	1	1	0	1.52e-07	501	541	4.71	0	1136.91	1	12	25	1444000	3	875.077	2623.22	0	0.01	34.35	3212	3212	MS2	29/92	29	92	AC2.RAW
High	B	2	AGDSSAEELANATQVQGPYLPIVR	14085	Unambiguous	genomic_reference:SL2.31ch12 evidence_code:10F1H1E1IEG gene_region:63525872-63527074 functional_description:"60S ribosomal protein L13 (AHRD V1 ***- Q3HRY7_SOLTU); contains Interpro domain(s) IPR001380 Ribosomal protein L13e "	1	1	Solyc12g096150.1.1		CID	1	0	1	1	0	3.03e-06	634	631	4.12	0	739.57	0	5	25	1746000	3	829.424	2486.26	0	1.87	49.83	4532	4532	MS2	29/92	29	92	AC2.RAW
High	B	2	FGNIELSPASGILNYGQGLFEGLK	19927	Rejected	genomic_reference:SL2.31ch03 evidence_code:10F0H1E1IEG gene_region:11507825-11514153 functional_description:"Branched-chain amino acid aminotransferase (AHRD V1 **** Q9SNY9_SOLTU); contains Interpro domain(s) IPR005786 Branched-chain amino acid aminotransferase II "	1	0			CID	0.0157	0	1	1	0	3.21e-06	509	531	3.81	0	1074.14	0	10	25	147000	3	842.108	2524.31	0	0.84	73.82	6518	6518	MS2	29/92	29	92	AC2.RAW
High	B	2	FGNIELSPSAGILNYGQGLFEGLK	19928	Selected	genomic_reference:SL2.31ch02 evidence_code:10F0H1E1IEG gene_region:47758983-47765135 functional_description:"Branched-chain-amino-acid aminotransferase (AHRD V1 ***- Q9SNY8_SOLTU); contains Interpro domain(s) IPR005786 Branched-chain amino acid aminotransferase II "	1	1	Solyc02g091970.1.1		CID		0.0157	2	2	0	4.8e-06	509	531	3.75	0	1074.14	0	10	25	147000	3	842.108	2524.31	0	0.84	73.82	6518	6518	MS2	29/92	29	92	AC2.RAW
High	C	2	VETGVIKPGMVVTFGPTGLTTEVK	34881	Unambiguous	genomic_reference:SL2.31ch06 evidence_code:10F0H1E1IEG gene_region:36374-37800 functional_description:"Elongation factor 1-alpha (AHRD V1 ***- Q8H9C0_SOLTU); contains Interpro domain(s) IPR004539 Translation elongation factor EF1A, eukaryotic and archaeal IPR000795 Protein synthesis factor, GTP-binding "	3	1	Solyc06g005060.1.1		CID	1	0	1	1	0	4.58e-06	284	255	4.01	0	935.64	0	25	25	1003000	3	820.785	2460.34	0	-0.13	50.64	4580	4580	MS2	29/92	29	92	AC3.RAW
High	C	2	ELDYLVGAVSNPQKPFAAIVGGSK	15602	Unambiguous	genomic_reference:SL2.31ch07 evidence_code:10F1H1E1IEG gene_region:65212571-65215004 functional_description:"Phosphoglycerate kinase (AHRD V1 ***- Q2VCK2_SOLTU); contains Interpro domain(s) IPR001576 Phosphoglycerate kinase "	1	1	Solyc07g066600.1.1		CID	1	0	1	1	0	3.7e-06	389	354	3.44	0	726.36	0	3	23	2020000	3	820.776	2460.31	0	0.31	55.25	4961	4961	MS2	29/92	29	92	AC3.RAW
High	D	2	SDVSNVVHADEFEYKDPVDGSVSK	9499	Unambiguous	genomic_reference:SL2.31ch04 evidence_code:10F0H1E1IEG gene_region:31641900-31656873 functional_description:"Phosphoglucomutase (AHRD V1 **** Q9AUQ4_ORYSA); contains Interpro domain(s) IPR016055 Alpha-D-phosphohexomutase, alpha/beta/alpha I, II and III "	1	1	Solyc04g045340.1.1		CID	1	0	1	1	0	6.34e-07	511	569	4.54	0	1088.09	1	5	25	2671000	3	875.078	2623.22	0	0.78	33.33	3064	3064	MS2	29/92	29	92	AH2.RAW
High	D	2	ELDYLVGAVSNPQKPFAAIVGGSK	15602	Unambiguous	genomic_reference:SL2.31ch07 evidence_code:10F1H1E1IEG gene_region:65212571-65215004 functional_description:"Phosphoglycerate kinase (AHRD V1 ***- Q2VCK2_SOLTU); contains Interpro domain(s) IPR001576 Phosphoglycerate kinase "	1	1	Solyc07g066600.1.1		CID	1	0	1	1	0	4.96e-07	399	359	3.86	0	868.11	0	11	25	1333000	3	820.777	2460.32	0	0.9	54.84	4897	4897	MS2	29/92	29	92	AH2.RAW
High	E	2	VETGVIKPGMVVTFGPTGLTTEVK	34881	Unambiguous	genomic_reference:SL2.31ch06 evidence_code:10F0H1E1IEG gene_region:36374-37800 functional_description:"Elongation factor 1-alpha (AHRD V1 ***- Q8H9C0_SOLTU); contains Interpro domain(s) IPR004539 Translation elongation factor EF1A, eukaryotic and archaeal IPR000795 Protein synthesis factor, GTP-binding "	3	1	Solyc06g005060.1.1		CID	1	0	1	1	0	0.000841	281	251	4.12	0	964.07	0	21	25	574600	3	820.786	2460.34	0	0.1	55.9	5020	5020	MS2	29/92	29	92	AH3.RAW
High	G	2	SDVSNVVHADEFEYKDPVDGSVSK	9499	Unambiguous	genomic_reference:SL2.31ch04 evidence_code:10F0H1E1IEG gene_region:31641900-31656873 functional_description:"Phosphoglucomutase (AHRD V1 **** Q9AUQ4_ORYSA); contains Interpro domain(s) IPR016055 Alpha-D-phosphohexomutase, alpha/beta/alpha I, II and III "	1	1	Solyc04g045340.1.1		CID	1	0	1	1	0	3.15e-16	519	566	4.46	0	1146.3	1	0	25	1507000	3	875.077	2623.22	0	0.29	32	3055	3055	MS2	29/92	29	92	EAC2.RAW
High	G	2	EAGQSGDGIESLINKVESFLAQGK	125340	Unambiguous	genomic_reference:SL2.31ch04 evidence_code:10F1H1E1IEG gene_region:51707258-51718268 functional_description:"Myosin class II heavy chain (ISS) (AHRD V1 *-*- Q014V4_OSTTA)"	1	1	Solyc04g054470.1.1		CID	1	0	1	1	0	2.59e-10	642	614	3.52	0	694.37	1	29	25	119200	3	826.421	2477.25	0	-1.09	90.21	7898	7898	MS2	29/92	29	92	EAC2.RAW
High	H	2	SDVSNVVHADEFEYKDPVDGSVSK	9499	Unambiguous	genomic_reference:SL2.31ch04 evidence_code:10F0H1E1IEG gene_region:31641900-31656873 functional_description:"Phosphoglucomutase (AHRD V1 **** Q9AUQ4_ORYSA); contains Interpro domain(s) IPR016055 Alpha-D-phosphohexomutase, alpha/beta/alpha I, II and III "	1	1	Solyc04g045340.1.1		CID	1	0	1	1	0	1.1e-05	522	568	3.95	0	1090.11	1	9	25	2306000	3	875.077	2623.22	0	0.36	35.22	3334	3334	MS2	29/92	29	92	EAC3_150410225534.RAW
High	I	2	AGDSSAEELATATQVQGPYLPITR	13090	Unambiguous	genomic_reference:SL2.31ch08 evidence_code:10F1H1E1IEG gene_region:56989651-56990657 functional_description:"60S ribosomal protein L13 (AHRD V1 ***- Q3HRY7_SOLTU); contains Interpro domain(s) IPR001380 Ribosomal protein L13e "	1	1	Solyc08g075700.1.1		CID	1	0	1	1	0	5.44e-06	683	646	4.31	0	989.96	0	8	25	1363000	3	825.751	2475.24	0	0.92	46.91	4352	4352	MS2	29/92	29	92	EAC4_150411011441.RAW
High	K	2	SDVSNVVHADEFEYKDPVDGSVSK	9499	Unambiguous	genomic_reference:SL2.31ch04 evidence_code:10F0H1E1IEG gene_region:31641900-31656873 functional_description:"Phosphoglucomutase (AHRD V1 **** Q9AUQ4_ORYSA); contains Interpro domain(s) IPR016055 Alpha-D-phosphohexomutase, alpha/beta/alpha I, II and III "	1	1	Solyc04g045340.1.1		CID	1	0	1	1	0	5.18e-07	512	574	4.29	0	1126.98	1	11	25	1214000	3	875.078	2623.22	0	1.2	34.21	3230	3230	MS2	29/92	29	92	EAH2.RAW
High	K	2	VETGVIKPGmVVTFGPTGLTTEVK	34881	Unambiguous	genomic_reference:SL2.31ch06 evidence_code:10F0H1E1IEG gene_region:36374-37800 functional_description:"Elongation factor 1-alpha (AHRD V1 ***- Q8H9C0_SOLTU); contains Interpro domain(s) IPR004539 Translation elongation factor EF1A, eukaryotic and archaeal IPR000795 Protein synthesis factor, GTP-binding "	3	1	Solyc06g005060.1.1	M10(Oxidation)	CID	1	0	1	1	0	1.6e-06	324	295	3.99	0	1001.42	0	13	25	1493000	3	826.118	2476.34	0	1.46	45.98	4249	4249	MS2	29/92	29	92	EAH2.RAW
High	L	2	FGNIELSPASGILNYGQGLFEGLK	19927	Rejected	genomic_reference:SL2.31ch03 evidence_code:10F0H1E1IEG gene_region:11507825-11514153 functional_description:"Branched-chain amino acid aminotransferase (AHRD V1 **** Q9SNY9_SOLTU); contains Interpro domain(s) IPR005786 Branched-chain amino acid aminotransferase II "	1	0			CID	0.0062	0	1	1	0	3.19e-16	509	531	4.81	0	1129.61	0	19	25	281100	3	842.108	2524.31	0	0.7	78.67	6998	6998	MS2	29/92	29	92	EAH4.RAW
High	L	2	FGNIELSPSAGILNYGQGLFEGLK	19928	Selected	genomic_reference:SL2.31ch02 evidence_code:10F0H1E1IEG gene_region:47758983-47765135 functional_description:"Branched-chain-amino-acid aminotransferase (AHRD V1 ***- Q9SNY8_SOLTU); contains Interpro domain(s) IPR005786 Branched-chain amino acid aminotransferase II "	1	1	Solyc02g091970.1.1		CID		0.0062	2	2	0	3.19e-16	509	531	4.78	0	1129.61	0	19	25	281100	3	842.108	2524.31	0	0.7	78.67	6998	6998	MS2	29/92	29	92	EAH4.RAW
High	A	2	LVVDEAVNDDNSVVALHPATmEK	9363	Unambiguous	genomic_reference:SL2.31ch06 evidence_code:10F1H1E1IEG gene_region:42870601-42877193 functional_description:"26S protease regulatory subunit 6B homolog (AHRD V1 *--- PRS6B_ARATH); contains Interpro domain(s) IPR005938 ATPase, AAA-type, CDC48 "	1	1	Solyc06g074980.1.1	M21(Oxidation)	CID	1	0	1	1	0	2.22e-05	666	673	3.63	0	689.02	0	14	25	480700	3	828.076	2482.21	0	-0.25	33.92	3143	3143	MS2	29/88	29	88	AC1.RAW
High	A	2	TmPAAVPAVVFLSGGQSEEEATR	13491	Unambiguous	genomic_reference:SL2.31ch10 evidence_code:10F1H1E1IEG gene_region:62683898-62686621 functional_description:"Fructose-bisphosphate aldolase (AHRD V1 ***- Q308A5_SOLTU); contains Interpro domain(s) IPR000741 Fructose-bisphosphate aldolase, class-I "	1	1	Solyc10g083570.1.1	M2(Oxidation)	CID	1	0	1	1	0	4.62e-08	679	716	4.87	0	859.36	0	11	25	795800	3	788.39	2363.16	0	0.72	48.54	4397	4397	MS2	29/88	29	88	AC1.RAW
High	A	2	FQGGSPYIYPLYGLGELPQAFAR	19682	Unambiguous	genomic_reference:SL2.31ch08 evidence_code:10F1H1E1IEG gene_region:6067492-6073431 functional_description:"Rab GDP dissociation inhibitor (AHRD V1 **** C0LSK7_NICBE); contains Interpro domain(s) IPR000806 Rab GDI protein "	2	1	Solyc08g015860.1.1		CID	1	0	1	1	0	0.000283	593	597	4.2	0	900.55	0	0	25	382300	3	848.774	2544.31	0	5.81	73.88	6495	6495	MS2	29/88	29	88	AC1.RAW
High	A	2	FQAGSPYIYPLYGLGELPQAFAR	19753	Unambiguous	genomic_reference:SL2.31ch01 evidence_code:10F1H1E1IEG gene_region:85610405-85615953 functional_description:"Rab-GDP dissociation inhibitor (AHRD V1 **** A5CKE3_SOLLC); contains Interpro domain(s) IPR000806 Rab GDI protein "	1	1	Solyc01g105810.1.1		CID	1	0	1	1	0	7.33e-07	607	571	4.52	0	938.95	0	5	25	337800	3	853.442	2558.31	0	0.97	74.14	6516	6516	MS2	29/88	29	88	AC1.RAW
High	B	2	ASSDLLLVQSDLYTLTDDGYVIR	19218	Unambiguous	genomic_reference:SL2.31ch05 evidence_code:10F0H1E1IEG gene_region:63182582-63189858 functional_description:"UTP-glucose 1 phosphate uridylyltransferase (AHRD V1 **** B3VDY8_EUCGR); contains Interpro domain(s) IPR016267 UTP--glucose-1-phosphate uridylyltransferase, subgroup "	1	1	Solyc05g054060.1.1		CID	1	0	1	1	0	0.000564	620	628	3.4	0	1000.35	0	0	25	348600	3	853.107	2557.31	0	1.09	70.61	6254	6254	MS2	29/88	29	88	AC2.RAW
High	E	2	AILGESNEFVGDKVAYALSQGLK	16917	Unambiguous	genomic_reference:SL2.31ch04 evidence_code:10F0H1E1IEG gene_region:3944492-3948735 functional_description:"Triosephosphate isomerase (AHRD V1 **** Q38JI4_SOLTU); contains Interpro domain(s) IPR000652 Triosephosphate isomerase "	1	1	Solyc04g011510.1.1		CID	1	0	1	1	0	0.00253	458	429	3.4	0	1092.46	1	12	25	637100	3	803.76	2409.27	0	0.11	66.55	5910	5910	MS2	29/88	29	88	AH3.RAW
High	E	2	LIDVDVPVIGGHAGITILPLLSK	83594	Unambiguous	genomic_reference:SL2.31ch09 evidence_code:10F0H1E1IEG gene_region:65754244-65755140 functional_description:"Malate dehydrogenase (AHRD V1 **** O48906_MEDSA); contains Interpro domain(s) IPR010097 Malate dehydrogenase, NAD-dependent, eukaryotes and gamma proteobacteria "	1	1	Solyc09g091070.1.1		CID	1	0	1	1	0	0.000816	33	28	3.37	0	505.03	0	14	25	88350	3	780.801	2340.39	0	-0.18	78.83	6940	6940	MS2	29/88	29	88	AH3.RAW
High	G	2	LLEQDNPDLGYDAAKGEYVDMVK	82285	Unambiguous	genomic_reference:SL2.31ch05 evidence_code:10F1H1E1IEG gene_region:62705442-62711235 functional_description:"chaperonin (AHRD V1 ***- D2LE93_RHOVA); contains Interpro domain(s) IPR001844 Chaperonin Cpn60 "	1	1	Solyc05g053470.1.1		CID	1	0	1	1	0	3.15e-16	648	664	3.2	0	781.79	1	8	25	2243000	3	861.748	2583.23	0	0.59	40.81	3818	3818	MS2	29/88	29	88	EAC2.RAW
High	H	2	AILGESNEFVGDKVAYALSQGLK	16917	Unambiguous	genomic_reference:SL2.31ch04 evidence_code:10F0H1E1IEG gene_region:3944492-3948735 functional_description:"Triosephosphate isomerase (AHRD V1 **** Q38JI4_SOLTU); contains Interpro domain(s) IPR000652 Triosephosphate isomerase "	1	1	Solyc04g011510.1.1		CID	1	0	1	1	0	4.73e-05	436	415	4.06	0	934.66	1	32	25	439500	3	803.761	2409.27	0	1.48	64.88	5880	5880	MS2	29/88	29	88	EAC3_150410225534.RAW
High	L	2	LVVDEATNDDNSVVAIHPDTmEK	30228	Unambiguous	genomic_reference:SL2.31ch10 evidence_code:10F0H1E1IEG gene_region:63047725-63052601 functional_description:"26S protease regulatory subunit 6B homolog (AHRD V1 *--- PRS6B_ARATH); contains Interpro domain(s) IPR005938 ATPase, AAA-type, CDC48 "	1	1	Solyc10g084050.1.1	M21(Oxidation)	CID	1	0	1	1	0	3.19e-16	624	563	4.59	0	1043.73	0	6	25	398500	3	843.399	2528.18	0	0.37	30.89	2923	2923	MS2	29/88	29	88	EAH4.RAW
High	L	2	KLLDELGIPAEDVPVDQFTPLGR	16968	Unambiguous	genomic_reference:SL2.31ch05 evidence_code:10F1H1E1IEG gene_region:64416664-64419540 functional_description:"Isopentenyl-diphosphate delta-isomerase (AHRD V1 **** Q84RZ8_9GENT); contains Interpro domain(s) IPR011876 Isopentenyl-diphosphate delta-isomerase, type 1 "	1	1	Solyc05g055760.1.1		CID	1	0	1	1	0	3.19e-16	362	335	3.03	0	960.48	1	25	25	440800	3	841.456	2522.35	0	1.13	64.86	5847	5847	MS2	29/88	29	88	EAH4.RAW
High	A	2	SGETEDTFIADLAVGLSTGQIK	19762	Unambiguous	genomic_reference:SL2.31ch09 evidence_code:10F1H1E1IEG gene_region:2371333-2375783 functional_description:"Enolase (AHRD V1 ***- C5J0G6_TOBAC); contains Interpro domain(s) IPR000941 Enolase "|genomic_reference:SL2.31ch10 evidence_code:10F1H1E1IEG gene_region:63994775-63999383 functional_description:"Enolase (AHRD V1 ***- C5J0G6_TOBAC); contains Interpro domain(s) IPR000941 Enolase "	2	2	Solyc09g009020.1.1;Solyc10g085550.1.1		CID	1	0	1	1	0	4.18e-05	645	662	3.32	0	602.25	0	9	25	1351000	3	751.38	2252.13	0	-1.08	75.13	6596	6596	MS2	29/84	29	84	AC1.RAW
High	B	2	VGDESYESFSAEKEAILSSLAR	15616	Unambiguous	genomic_reference:SL2.31ch06 evidence_code:10F0H1E1IEG gene_region:36234655-36238685 functional_description:"Alanine aminotransferase (AHRD V1 **** Q6VEJ5_CAPAN); contains Interpro domain(s) IPR004839 Aminotransferase, class I and II "	1	1	Solyc06g063090.1.1		CID	1	0	1	1	0	8.66e-06	636	656	4.3	0	1041.39	1	27	25	394600	3	796.725	2388.16	0	1.87	55.86	5037	5037	MS2	29/84	29	84	AC2.RAW
High	B	2	VGLDVAEAQHLMDGLDWQGAVK	14358	Unambiguous	genomic_reference:SL2.31ch05 evidence_code:10F0H1E1IEG gene_region:55518326-55523602 functional_description:"Carboxymethylenebutenolidase-like protein (AHRD V1 ***- Q8LQS5_ORYSJ); contains Interpro domain(s) IPR002925 Dienelactone hydrolase "	1	1	Solyc05g043430.1.1		CID	1	0	1	1	0	1.48e-08	625	597	4.3	0	1102.85	0	21	25	228300	3	784.727	2352.17	0	-0.11	62.95	5626	5626	MS2	29/84	29	84	AC2.RAW
High	B	2	VQDEEVGDGTTSVVVLAGELLR	19150	Unambiguous	genomic_reference:SL2.31ch11 evidence_code:10F1H1E1IEG gene_region:50651405-50656732 functional_description:"T-complex protein 1 subunit beta (AHRD V1 ***- B6T8X5_MAIZE); contains Interpro domain(s) IPR012716 T-complex protein 1, beta subunit "	1	1	Solyc11g069000.1.1		CID	1	0	1	1	0	8.59e-06	581	533	3.96	0	1235.01	0	19	25	218500	3	762.732	2286.18	0	0.19	70.04	6208	6208	MS2	29/84	29	84	AC2.RAW
High	B	2	VYLSADDLLLNLQDFNLDTTRK	19527	Unambiguous	genomic_reference:SL2.31ch10 evidence_code:10F1H1E1IEG gene_region:2276303-2278346 functional_description:"Prohibitin 1-like protein (AHRD V1 ***- Q9AXM0_BRANA); contains Interpro domain(s) IPR000163 Prohibitin "	1	1	Solyc10g008140.1.1		CID	1	0	1	1	0	3.19e-05	480	513	3.17	0	940.64	1	12	25	142800	3	856.451	2567.34	0	1.3	71.81	6352	6352	MS2	29/84	29	84	AC2.RAW
High	C	2	TYPEEMIQTGISTVDVMNSIAR	15373	Unambiguous	genomic_reference:SL2.31ch01 evidence_code:10F1H1E1IEG gene_region:89701881-89706797 functional_description:"V-type ATP synthase beta chain (AHRD V1 ***- VATB_PYRHO); contains Interpro domain(s) IPR005723 ATPase, V1 complex, subunit B "	1	1	Solyc01g111760.1.1		CID	1	0	1	1	0	1.58e-06	675	675	3.73	0	1340.23	0	17	25	73080	3	819.07	2455.19	0	3.89	69.7	6139	6139	MS2	29/84	29	84	AC3.RAW
High	E	2	VYLSADDLLLNLQDFNLDTTRK	19527	Unambiguous	genomic_reference:SL2.31ch10 evidence_code:10F1H1E1IEG gene_region:2276303-2278346 functional_description:"Prohibitin 1-like protein (AHRD V1 ***- Q9AXM0_BRANA); contains Interpro domain(s) IPR000163 Prohibitin "	1	1	Solyc10g008140.1.1		CID	1	0	1	1	0	0.0038	498	534	3.6	0	546.2	1	14	25	353000	3	856.449	2567.33	0	-0.98	78.49	6911	6911	MS2	29/84	29	84	AH3.RAW
High	F	2	VGDESYESFSAEKEAILSSLAR	15616	Unambiguous	genomic_reference:SL2.31ch06 evidence_code:10F0H1E1IEG gene_region:36234655-36238685 functional_description:"Alanine aminotransferase (AHRD V1 **** Q6VEJ5_CAPAN); contains Interpro domain(s) IPR004839 Aminotransferase, class I and II "	1	1	Solyc06g063090.1.1		CID	1	0	1	1	0	1.66e-08	640	664	3.78	0	1231.01	1	18	25	253200	3	796.725	2388.16	0	1.57	58.69	5362	5362	MS2	29/84	29	84	AH4.RAW
High	F	2	SVSQLLNMMDQMMDSPFVAAPR	119159	Unambiguous	genomic_reference:SL2.31ch08 evidence_code:10F1H1E1IEG gene_region:59635405-59636272 functional_description:"Heat shock protein 22 (AHRD V1 ***- Q27JQ0_METAN); contains Interpro domain(s) IPR002068 Heat shock protein Hsp20 "	1	1	Solyc08g078700.1.1		CID	1	0	1	1	0	7.31e-08	513	453	4.26	0	1316.2	0	11	25	108600	3	823.386	2468.14	0	-0.11	93.62	8276	8276	MS2	29/84	29	84	AH4.RAW
High	F	2	APLLIIAEDITGEALATLVVNK	86363	Unambiguous	genomic_reference:SL2.31ch11 evidence_code:10F1H1E1IEG gene_region:51501731-51506639 functional_description:"chaperonin (AHRD V1 ***- B2IXD2_NOSP7); contains Interpro domain(s) IPR001844 Chaperonin Cpn60 "	1	1	Solyc11g069790.1.1		CID	1	0	1	1	0	1.78e-06	66	70	4.36	0	962.06	0	5	25	86170	3	755.442	2264.31	0	0.25	100.4	8871	8871	MS2	29/84	29	84	AH4.RAW
High	G	2	INEFNNEITTVMEDLVNSTDLK	21568	Unambiguous	genomic_reference:SL2.31ch09 evidence_code:10F0H1E1IEG gene_region:5486457-5491126 functional_description:"Acetyl-coenzyme A carboxylase carboxyl transferase subunit alpha (AHRD V1 *-*- B7KJL9_CYAP7); contains Interpro domain(s) IPR001095 Acetyl-CoA carboxylase, alpha subunit "	1	1	Solyc09g013080.1.1		CID	1	0	1	1	0	3.15e-16	658	650	4.47	0	1128.78	0	8	25	265400	3	847.079	2539.22	0	-0.09	89.59	7850	7850	MS2	29/84	29	84	EAC2.RAW
High	I	2	LALYDIAGTPGVAADVSHINTR	13484	Unambiguous	genomic_reference:SL2.31ch12 evidence_code:10F1H1E1IEG gene_region:5028935-5033187 functional_description:"Malate dehydrogenase (AHRD V1 ***- Q8L5C9_SOLTU); contains Interpro domain(s) IPR010097 Malate dehydrogenase, NAD-dependent, eukaryotes and gamma proteobacteria "	1	1	Solyc12g014180.1.1		CID	1	0	1	1	0	4.48e-08	458	499	3.65	0	837.4	0	10	23	1640000	3	752.066	2254.18	0	0.46	48.61	4496	4496	MS2	29/84	29	84	EAC4_150411011441.RAW
High	I	2	LIGEAADLMQEVAVETFGAMAK	21469	Unambiguous	genomic_reference:SL2.31ch04 evidence_code:10F1H1E1IEG gene_region:49587422-49595735 functional_description:"26S proteasome non-ATPase regulatory subunit 12 (AHRD V1 ***- B5X386_SALSA); contains Interpro domain(s) IPR000717 Proteasome component region PCI "	1	1	Solyc04g051370.1.1		CID	1	0	1	1	0	8.81e-07	647	654	4.15	0	1681.4	0	21	25	97200	3	765.386	2294.14	0	1.12	85.66	7706	7706	MS2	29/84	29	84	EAC4_150411011441.RAW
High	J	2	FTHILYNLSPAELYEQAIQNEK	39194	Unambiguous	genomic_reference:SL2.31ch12 evidence_code:10F0H1E1IEG gene_region:62058939-62062897 functional_description:"Phosphoenolpyruvate carboxykinase (AHRD V1 ***- Q8W505_SOLLC); contains Interpro domain(s) IPR001272 Phosphoenolpyruvate carboxykinase, ATP-utilising "	1	1	Solyc12g088160.1.1		CID	1	0	1	1	0	0.000381	647	609	4.12	0	1200.01	0	4	25	1600000	3	874.446	2621.32	0	-0.9	63.08	5834	5834	MS2	29/84	29	84	EAH1.RAW
High	J	2	AAGASWIQLDEPTLVLDLESHK	17962	Unambiguous	genomic_reference:SL2.31ch10 evidence_code:10F1H1E1IEG gene_region:61889662-61892937 functional_description:"5-methyltetrahydropteroyltriglutamate--homocysteine methyltransferase (AHRD V1 ***- B6UF55_MAIZE); contains Interpro domain(s) IPR006276 5-methyltetrahydropteroyltriglutamate--homocysteine S-methyltransferase "	1	1	Solyc10g081510.1.1		CID	1	0	1	1	0	0.000835	562	568	3.52	0	855.07	0	12	24	1431000	3	798.418	2393.24	0	1.43	66.34	6107	6107	MS2	29/84	29	84	EAH1.RAW
High	L	2	SVSQLLNmmDQmmDSPFVAAPR	119159	Unambiguous	genomic_reference:SL2.31ch08 evidence_code:10F1H1E1IEG gene_region:59635405-59636272 functional_description:"Heat shock protein 22 (AHRD V1 ***- Q27JQ0_METAN); contains Interpro domain(s) IPR002068 Heat shock protein Hsp20 "	1	1	Solyc08g078700.1.1	M8(Oxidation); M9(Oxidation); M12(Oxidation); M13(Oxidation)	CID	1	0	1	1	0	3.19e-16	311	327	4.49	0	1094.61	0	19	25	238100	3	844.713	2532.13	0	0.53	44.47	4114	4114	MS2	29/84	29	84	EAH4.RAW
High	L	2	ELDALLSDESLATVPFLILGNK	21108	Unambiguous	genomic_reference:SL2.31ch01 evidence_code:10F1H1E1IEG gene_region:71122874-71128182 functional_description:"ADP-ribosylation factor-like protein 3 (AHRD V1 **-- ARL3_CAEEL); contains Interpro domain(s) IPR006687 GTP-binding protein SAR1 "	2	1	Solyc01g079540.1.1		CID	1	0	1	1	0	3.19e-16	346	346	3.19	0	730.44	0	25	25	134100	3	786.765	2358.28	0	-0.42	88.67	7828	7828	MS2	29/84	29	84	EAH4.RAW
High	A	2	SYDSTTHFESTVMDVLDmYSK	18412	Unambiguous	genomic_reference:SL2.31ch01 evidence_code:10F1H1E1IEG gene_region:85610405-85615953 functional_description:"Rab-GDP dissociation inhibitor (AHRD V1 **** A5CKE3_SOLLC); contains Interpro domain(s) IPR000806 Rab GDI protein "	1	1	Solyc01g105810.1.1	M18(Oxidation)	CID	1	0	1	1	0	1.22e-05	194	199	3.7	0	1215.01	0	9	25	433800	3	824.692	2472.06	0	1.4	67.85	6002	6002	MS2	29/80	29	80	AC1.RAW
High	C	2	APEDPILGVTVAYNNDSSPVK	12399	Unambiguous	genomic_reference:SL2.31ch07 evidence_code:10F0H1E1IEG gene_region:40596527-40601185 functional_description:"Aspartate aminotransferase (AHRD V1 **** A9PHH1_POPTR); contains Interpro domain(s) IPR000796 Aspartate/other aminotransferase "	1	1	Solyc07g032740.1.1		CID	1	0	1	1	0	4.01e-06	665	599	3.75	0	1516.3	0	12	25	809200	3	729.369	2186.09	0	-1.94	44.14	4041	4041	MS2	29/80	29	80	AC3.RAW
High	C	2	LLFHFPPNSDTDLDSYVIGDK	60145	Unambiguous	genomic_reference:SL2.31ch11 evidence_code:10F1H1E1IEG gene_region:1510020-1515652 functional_description:"Diphosphomevalonate decarboxylase-like protein (AHRD V1 ***- Q8LAR8_ARATH); contains Interpro domain(s) IPR005935 Diphosphomevalonate decarboxylase "	1	1	Solyc11g007020.1.1		CID	1	0	1	1	0	4.34e-08	663	695	4.16	0	1328.36	0	4	25	447000	3	798.393	2393.17	0	-0.06	57.23	5125	5125	MS2	29/80	29	80	AC3.RAW
High	C	2	IPLIEEQLGTLITDDPSVIER	18824	Unambiguous	genomic_reference:SL2.31ch01 evidence_code:10F1H1E1IEG gene_region:76100102-76108119 functional_description:"Enoyl-CoA-hydratase (AHRD V1 ***- Q9SE41_AVIMR); contains Interpro domain(s) IPR001753 Crotonase, core "	1	1	Solyc01g090700.1.1		CID	1	0	1	1	0	6.4e-07	325	283	3.74	0	1627.36	0	7	25	148000	3	784.429	2351.27	0	0.98	69.25	6103	6103	MS2	29/80	29	80	AC3.RAW
High	D	2	LTGmAFRVPTVDVSVVDLTAR	15163	Unambiguous	genomic_reference:SL2.31ch05 evidence_code:10F0H1E0IEG gene_region:648534-651184 functional_description:"Glyceraldehyde-3-phosphate dehydrogenase (AHRD V1 **** Q9XG67_TOBAC); contains Interpro domain(s) IPR000173 Glyceraldehyde 3-phosphate dehydrogenase "	1	1	Solyc05g005820.1.1	M4(Oxidation)	CID	1	0	1	1	0	7.8e-08	393	365	4.7	0	1377.56	1	9	14	3377000	3	755.076	2263.21	0	0.72	53.1	4753	4753	MS2	29/80	29	80	AH2.RAW
High	D	2	VLDNDVPVALDILADILQNSK	22104	Unambiguous	genomic_reference:SL2.31ch02 evidence_code:10F0H1E1IEG gene_region:45268492-45273369 functional_description:"Mitochondrial processing peptidase beta subunit (AHRD V1 ***- Q9AXQ2_CUCME); contains Interpro domain(s) IPR011237 Peptidase M16, core "	1	1	Solyc02g088700.1.1		CID	1	0	1	1	0	6.52e-08	276	272	4.54	0	1352.7	0	8	25	282700	3	755.751	2265.24	0	1.63	96.9	8326	8326	MS2	29/80	29	80	AH2.RAW
High	E	2	IPLIEEQLGTLITDDPSVIER	18824	Unambiguous	genomic_reference:SL2.31ch01 evidence_code:10F1H1E1IEG gene_region:76100102-76108119 functional_description:"Enoyl-CoA-hydratase (AHRD V1 ***- Q9SE41_AVIMR); contains Interpro domain(s) IPR001753 Crotonase, core "	1	1	Solyc01g090700.1.1		CID	1	0	1	1	0.000366	0.0371	328	286	3.22	0	943.22	0	22	25	196000	3	784.429	2351.27	0	0.75	75.32	6643	6643	MS2	29/80	29	80	AH3.RAW
High	F	2	AVLDPADPLGFLQAAFEFVGR	22215	Unambiguous	genomic_reference:SL2.31ch03 evidence_code:10F1H1E1IEG gene_region:46784322-46788425 functional_description:"Nuclear movement protein nudc (AHRD V1 *-*- Q17KI6_AEDAE); contains Interpro domain(s) IPR017447 CS "	1	1	Solyc03g083390.1.1		CID	1	0	1	1	0	1.17e-08	536	524	4.06	0	914.49	0	4	25	127500	3	745.061	2233.17	0	0.8	98.93	8742	8742	MS2	29/80	29	80	AH4.RAW
High	H	2	IPSAVGYQPTLATDLGGLQER	13265	Unambiguous	genomic_reference:SL2.31ch02 evidence_code:10F0H1E0IEG gene_region:47123903-47126760 functional_description:"ATP synthase subunit beta (AHRD V1 ***- Q9ZR78_NICSY); contains Interpro domain(s) IPR005722 ATPase, F1 complex, beta subunit "|genomic_reference:SL2.31ch04 evidence_code:10F1H1E1IEG gene_region:1237570-1241219 functional_description:"ATP synthase subunit beta (AHRD V1 ***- O82722_NICSY); …	3	3	Solyc02g091130.1.1;Solyc04g007550.1.1;Solyc05g008460.1.1		CID	1	0	1	1	0	4.14e-06	519	527	3.88	0	1341.11	0	7	20	2748000	3	729.387	2186.15	0	0.57	48.41	4479	4479	MS2	29/80	29	80	EAC3_150410225534.RAW
High	I	2	mLVYQDLLTGDELLSDSFPYK	19485	Unambiguous	genomic_reference:SL2.31ch01 evidence_code:10F1H1E1IEG gene_region:81675915-81677545 functional_description:"Translationally-controlled tumor protein homolog (AHRD V1 ***- B5XDL0_SALSA); contains Interpro domain(s) IPR001983 Translationally controlled tumour-associated TCTP "|genomic_reference:SL2.31ch01 evidence_code:10F1H1E1IEG gene_region:81681494-81683364 functional_description:"Translational…	2	2	Solyc01g099770.1.1;Solyc01g099780.1.1	M1(Oxidation)	CID	1	0	1	1	0	2.81e-06	759	658	3.98	0	1188.37	0	39	25	108300	3	821.738	2463.2	0	-0.73	71.39	6431	6431	MS2	29/80	29	80	EAC4_150411011441.RAW
High	J	2	SYDSTTHFESTVMDVLDmYSK	18412	Unambiguous	genomic_reference:SL2.31ch01 evidence_code:10F1H1E1IEG gene_region:85610405-85615953 functional_description:"Rab-GDP dissociation inhibitor (AHRD V1 **** A5CKE3_SOLLC); contains Interpro domain(s) IPR000806 Rab GDI protein "	1	1	Solyc01g105810.1.1	M18(Oxidation)	CID	1	0	1	1	0	0.000117	190	173	4.5	0	1313.99	0	31	25	841100	3	824.691	2472.06	0	-0.45	68.25	6268	6268	MS2	29/80	29	80	EAH1.RAW
High	L	2	IPSAVGYQPTLATDLGGLQER	13265	Unambiguous	genomic_reference:SL2.31ch02 evidence_code:10F0H1E0IEG gene_region:47123903-47126760 functional_description:"ATP synthase subunit beta (AHRD V1 ***- Q9ZR78_NICSY); contains Interpro domain(s) IPR005722 ATPase, F1 complex, beta subunit "|genomic_reference:SL2.31ch04 evidence_code:10F1H1E1IEG gene_region:1237570-1241219 functional_description:"ATP synthase subunit beta (AHRD V1 ***- O82722_NICSY); …	3	3	Solyc02g091130.1.1;Solyc04g007550.1.1;Solyc05g008460.1.1		CID	1	0	1	1	0	3.19e-16	510	521	4.08	0	1468.07	0	9	25	405600	3	729.387	2186.15	0	0.65	49.65	4555	4555	MS2	29/80	29	80	EAH4.RAW
High	B	2	QmGLSDQDIVALSGAHTLGR	11135	Unambiguous	genomic_reference:SL2.31ch06 evidence_code:10F1H1E1IEG gene_region:182627-184940 functional_description:"Ascorbate peroxidase (AHRD V1 ***- Q9SMD3_SOLLC); contains Interpro domain(s) IPR019793 Peroxidases heam-ligand binding site IPR019794 Peroxidase, active site IPR002016 Haem peroxidase, plant/fungal/bacterial "	1	1	Solyc06g005160.1.1	M2(Oxidation)	CID	1	0	1	1	0	8.55e-07	639	615	3.04	0	785.18	0	22	25	1037000	3	695.685	2085.04	0	0.48	39.65	3671	3671	MS2	29/76	29	76	AC2.RAW
High	B	2	VSQMIEDHEPFEGQALLDAK	10284	Unambiguous	genomic_reference:SL2.31ch06 evidence_code:10F1H1E1IEG gene_region:6258168-6260708 functional_description:"Elongation factor 1-gamma (AHRD V1 ***- B7SDI2_ORYSJ); contains Interpro domain(s) IPR001662 Translation elongation factor EF1B, gamma chain, conserved "	1	1	Solyc06g011280.1.1		CID	1	0	1	1	0	5.99e-06	708	691	3.87	0	1347.93	0	15	25	684900	3	753.033	2257.08	0	1.71	41.67	3844	3844	MS2	29/76	29	76	AC2.RAW
High	B	2	EAPSFVEQATEQQILVTGIK	14781	Unambiguous	genomic_reference:SL2.31ch02 evidence_code:10F0H1E0IEG gene_region:47123903-47126760 functional_description:"ATP synthase subunit beta (AHRD V1 ***- Q9ZR78_NICSY); contains Interpro domain(s) IPR005722 ATPase, F1 complex, beta subunit "	1	1	Solyc02g091130.1.1		CID	1	0	1	1	0	3.69e-07	518	513	4.81	0	1431.19	0	16	25	805500	3	730.055	2188.15	0	0.59	52.32	4743	4743	MS2	29/76	29	76	AC2.RAW
High	B	2	DTFGPILVPSDKLWGAQTQR	14984	Unambiguous	genomic_reference:SL2.31ch09 evidence_code:10F1H1E1IEG gene_region:62645740-62653816 functional_description:"Fumarate hydratase class II (AHRD V1 ***- C5GAL1_AJEDR); contains Interpro domain(s) IPR005677 Fumarate hydratase, class II "	1	1	Solyc09g075450.1.1		CID	1	0	1	1	0	4.65e-06	516	532	3.89	0	958.3	1	4	25	297700	3	743.728	2229.17	0	2	53.13	4810	4810	MS2	29/76	29	76	AC2.RAW
High	B	2	IDELVEEAVEFADESPHPVR	16651	Unambiguous	genomic_reference:SL2.31ch12 evidence_code:10F0H1E1IEG gene_region:2683408-2687114 functional_description:"Pyruvate dehydrogenase E1 component alpha subunit (AHRD V1 ***- Q5N030_SYNP6); contains Interpro domain(s) IPR017597 Pyruvate dehydrogenase (acetyl-transferring) E1 component, alpha subunit, subgroup y "	2	1	Solyc12g009400.1.1		CID	1	0	1	1	0	6e-08	650	661	3.99	0	832.72	0	14	25	735500	3	761.037	2281.1	0	-0.23	59.57	5343	5343	MS2	29/76	29	76	AC2.RAW
High	C	2	GYEAATATANSDLPSTHPIR	6311	Unambiguous	genomic_reference:SL2.31ch01 evidence_code:10F0H1E0IEG gene_region:5171992-5174989 functional_description:"14-3-3-like protein GF14 epsilon (AHRD V1 **-- 14310_ARATH); contains Interpro domain(s) IPR000308 14-3-3 protein "	1	1	Solyc01g010360.1.1		CID	1	0	1	1	0	4.09e-07	592	596	3.9	0	1269.54	0	11	15	4341000	3	691.34	2072	0	0.01	23.19	2202	2202	MS2	29/76	29	76	AC3.RAW
High	C	2	IGANEPSQLAINDNANGLAR	8316	Unambiguous	genomic_reference:SL2.31ch09 evidence_code:10F0H1E1IEG gene_region:2645029-2646904 functional_description:"Fructose-bisphosphate aldolase (AHRD V1 ***- Q2PYX3_SOLTU); contains Interpro domain(s) IPR000741 Fructose-bisphosphate aldolase, class-I "|genomic_reference:SL2.31ch10 evidence_code:10F1H1E1IEG gene_region:62683898-62686621 functional_description:"Fructose-bisphosphate aldolase (AHRD V1 ***…	2	2	Solyc09g009260.1.1;Solyc10g083570.1.1		CID	1	0	1	1	0	2.21e-06	609	626	3.5	0	1362.48	0	20	23	1519000	3	680.016	2038.03	0	0.5	29.52	2775	2775	MS2	29/76	29	76	AC3.RAW
High	C	2	FIVEAANHPTDPDADEILSK	9984	Unambiguous	genomic_reference:SL2.31ch05 evidence_code:10F0H1E1IEG gene_region:61565704-61570805 functional_description:"Glutamate dehydrogenase (AHRD V1 **** Q94IA5_BRANA); contains Interpro domain(s) IPR014362 Glutamate dehydrogenase "	1	1	Solyc05g052100.1.1		CID	1	0	1	1	0	1.74e-07	595	604	3.18	0	502.14	0	9	15	2663000	3	728.027	2182.07	0	0.51	35.06	3265	3265	MS2	29/76	29	76	AC3.RAW
High	C	2	VSQmIEDHEPFEGQALLDAK	10284	Unambiguous	genomic_reference:SL2.31ch06 evidence_code:10F1H1E1IEG gene_region:6258168-6260708 functional_description:"Elongation factor 1-gamma (AHRD V1 ***- B7SDI2_ORYSJ); contains Interpro domain(s) IPR001662 Translation elongation factor EF1B, gamma chain, conserved "	1	1	Solyc06g011280.1.1	M4(Oxidation)	CID	1	0	1	1	0	7.11e-09	584	620	5.51	0	1466.38	0	7	18	2076000	3	758.364	2273.08	0	1.17	36.21	3365	3365	MS2	29/76	29	76	AC3.RAW
High	C	2	EAPSFVEQATEQQILVTGIK	14781	Unambiguous	genomic_reference:SL2.31ch02 evidence_code:10F0H1E0IEG gene_region:47123903-47126760 functional_description:"ATP synthase subunit beta (AHRD V1 ***- Q9ZR78_NICSY); contains Interpro domain(s) IPR005722 ATPase, F1 complex, beta subunit "	1	1	Solyc02g091130.1.1		CID	1	0	1	1	0	5.13e-08	514	507	4.49	0	1188.82	0	6	25	1389000	3	730.055	2188.15	0	0.17	52.31	4719	4719	MS2	29/76	29	76	AC3.RAW
High	C	2	GVNPDEAVAMGAALQGGILR	12262	Unambiguous	genomic_reference:SL2.31ch01 evidence_code:10F1H1E1IEG gene_region:85918697-85922173 functional_description:"Chaperone DnaK (AHRD V1 ***- A2Q199_MEDTR); contains Interpro domain(s) IPR012725 Chaperone DnaK "	1	1	Solyc01g106210.1.1		CID	1	0	1	1	0	3.8e-09	511	512	3.95	0	1299.45	0	9	25	856600	3	647.007	1939.01	0	-0.1	55.9	5014	5014	MS2	29/76	29	76	AC3.RAW
High	D	2	TAAYGHFGRDDPDFTWETVK	10668	Unambiguous	genomic_reference:SL2.31ch09 evidence_code:10F1H1E1IEG gene_region:1749910-1751082 functional_description:"S-adenosylmethionine synthase (AHRD V1 ***- B5LAW6_CAPAN); contains Interpro domain(s) IPR002133 S-adenosylmethionine synthetase "	1	1	Solyc09g008280.1.1		CID	1	0	1	1	0	8.69e-05	459	483	3.33	0	934.82	1	15	23	1359000	3	771.691	2313.06	0	0.36	36.71	3362	3362	MS2	29/76	29	76	AH2.RAW
High	D	2	YHPEVDLDEVNALAQLmTWK	16841	Unambiguous	genomic_reference:SL2.31ch05 evidence_code:10F0H1E1IEG gene_region:61565704-61570805 functional_description:"Glutamate dehydrogenase (AHRD V1 **** Q94IA5_BRANA); contains Interpro domain(s) IPR014362 Glutamate dehydrogenase "	1	1	Solyc05g052100.1.1	M17(Oxidation)	CID	1	0	1	1	0	5.96e-07	648	683	4.61	0	1328.47	0	20	25	885000	3	796.725	2388.16	0	2.46	60.03	5326	5326	MS2	29/76	29	76	AH2.RAW
High	F	2	VSQmIEDHEPFEGQALLDAK	10284	Unambiguous	genomic_reference:SL2.31ch06 evidence_code:10F1H1E1IEG gene_region:6258168-6260708 functional_description:"Elongation factor 1-gamma (AHRD V1 ***- B7SDI2_ORYSJ); contains Interpro domain(s) IPR001662 Translation elongation factor EF1B, gamma chain, conserved "	1	1	Solyc06g011280.1.1	M4(Oxidation)	CID	1	0	1	1	0	1.25e-09	590	620	4.25	0	1593.6	0	15	23	1386000	3	758.363	2273.08	0	0.12	39.31	3707	3707	MS2	29/76	29	76	AH4.RAW
High	F	2	YRVENLYEGPLDDAYANAIR	13960	Unambiguous	genomic_reference:SL2.31ch08 evidence_code:10F0H1E1IEG gene_region:49546658-49549476 functional_description:"Elongation factor EF-2 (AHRD V1 **** Q9SGT4_ARATH); contains Interpro domain(s) IPR000795 Protein synthesis factor, GTP-binding "	2	1	Solyc08g062920.1.1		CID	1	0	1	1	0	3.54e-06	633	630	4.02	0	1491.9	1	7	25	1030000	3	781.385	2342.14	0	-0.17	52.37	4833	4833	MS2	29/76	29	76	AH4.RAW
High	F	2	YHPEVDLDEVNALAQLmTWK	16841	Unambiguous	genomic_reference:SL2.31ch05 evidence_code:10F0H1E1IEG gene_region:61565704-61570805 functional_description:"Glutamate dehydrogenase (AHRD V1 **** Q94IA5_BRANA); contains Interpro domain(s) IPR014362 Glutamate dehydrogenase "	1	1	Solyc05g052100.1.1	M17(Oxidation)	CID	1	0	1	1	0	1.56e-09	645	692	4.11	0	1241.25	0	18	25	326100	3	796.723	2388.16	0	0.55	63.97	5801	5801	MS2	29/76	29	76	AH4.RAW
High	F	2	IVGNIGDQWSDLLGDYVGQR	17926	Unambiguous	genomic_reference:SL2.31ch03 evidence_code:10F0H1E1IEG gene_region:63376561-63377589 functional_description:"Acid phosphatase (AHRD V1 **-- O49855_SOYBN); contains Interpro domain(s) IPR010028 Acid phosphatase, plant "	1	1	Solyc03g121100.1.1		CID	1	0	1	1	0	3.77e-08	649	657	4.09	0	1110.98	0	5	25	219100	3	735.703	2205.09	0	0.57	68.31	6161	6161	MS2	29/76	29	76	AH4.RAW
High	F	2	VSPTYHLYSPSEVEDVISRL	82439	Unambiguous	genomic_reference:SL2.31ch08 evidence_code:10F0H1E1IEG gene_region:7616348-7622096 functional_description:"Proteasome subunit alpha type (AHRD V1 ***- C6SW82_SOYBN); contains Interpro domain(s) IPR001353 Proteasome, subunit alpha/beta "	1	1	Solyc08g016510.1.1		CID	1	0	1	1	0	3.02e-07	650	639	4.04	0	863.2	1	7	25	133500	3	764.39	2291.16	0	0.57	70.94	6376	6376	MS2	29/76	29	76	AH4.RAW
High	F	2	LGIQVLPLLPITEVVFSDAR	125699	Unambiguous	genomic_reference:SL2.31ch03 evidence_code:10F0H1E0IEG gene_region:15884092-15886293 functional_description:"Endo-1 3-beta-glucanase (AHRD V1 ***- C5FLR9_NANOT); contains Interpro domain(s) IPR005200 Glycoside hydrolase, family 81 "	1	1	Solyc03g046200.1.1		CID	1	0	1	1	0	2.1e-09	65	62	3.53	0	1294.94	0	18	25	125500	3	727.429	2180.27	0	1.76	95.95	8485	8485	MS2	29/76	29	76	AH4.RAW
High	F	2	FDDGLPPILTALEVLDNQIR	21890	Unambiguous	genomic_reference:SL2.31ch04 evidence_code:10F1H1E1IEG gene_region:1237570-1241219 functional_description:"ATP synthase subunit beta (AHRD V1 ***- O82722_NICSY); contains Interpro domain(s) IPR005722 ATPase, F1 complex, beta subunit "	1	1	Solyc04g007550.1.1		CID	1	0	1	1	0	7.71e-11	409	371	3.4	0	1049.37	0	7	25	246000	3	747.071	2239.2	0	0.71	96.87	8566	8566	MS2	29/76	29	76	AH4.RAW
High	G	2	GYEAATATANSDLPSTHPIR	6311	Unambiguous	genomic_reference:SL2.31ch01 evidence_code:10F0H1E0IEG gene_region:5171992-5174989 functional_description:"14-3-3-like protein GF14 epsilon (AHRD V1 **-- 14310_ARATH); contains Interpro domain(s) IPR000308 14-3-3 protein "	1	1	Solyc01g010360.1.1		CID	1	0	1	1	0	3.15e-16	594	594	4.12	0	1080.73	0	10	10	5833000	3	691.34	2072	0	0.01	21.44	2101	2101	MS2	29/76	29	76	EAC2.RAW
High	G	2	VELGDATTAADPSGEHVISR	6763	Unambiguous	genomic_reference:SL2.31ch12 evidence_code:10F1H1E1IEG gene_region:63232222-63238853 functional_description:"Diphosphate--fructose-6-phosphate 1-phosphotransferase (AHRD V1 ***- C8PT93_9SPIO); contains Interpro domain(s) IPR011183 Pyrophosphate-dependent phosphofructokinase PfpB "	1	1	Solyc12g095760.1.1		CID	1	0	1	1	0	3.15e-16	638	625	3.13	0	807.02	0	17	10	6912000	3	675.668	2024.99	0	0.36	23.23	2265	2265	MS2	29/76	29	76	EAC2.RAW
High	G	2	VSQmIEDHEPFEGQALLDAK	10284	Unambiguous	genomic_reference:SL2.31ch06 evidence_code:10F1H1E1IEG gene_region:6258168-6260708 functional_description:"Elongation factor 1-gamma (AHRD V1 ***- B7SDI2_ORYSJ); contains Interpro domain(s) IPR001662 Translation elongation factor EF1B, gamma chain, conserved "	1	1	Solyc06g011280.1.1	M4(Oxidation)	CID	1	0	1	1	0	3.15e-16	576	610	4.41	0	1357.38	0	26	16	2099000	3	758.364	2273.08	0	0.93	34.37	3262	3262	MS2	29/76	29	76	EAC2.RAW
High	G	2	YRVENLYEGPLDDAYANAIR	13960	Unambiguous	genomic_reference:SL2.31ch08 evidence_code:10F0H1E1IEG gene_region:49546658-49549476 functional_description:"Elongation factor EF-2 (AHRD V1 **** Q9SGT4_ARATH); contains Interpro domain(s) IPR000795 Protein synthesis factor, GTP-binding "	2	1	Solyc08g062920.1.1		CID	1	0	1	1	0	3.15e-16	627	628	4.68	0	1790.44	1	17	19	2279000	3	781.385	2342.14	0	0.22	47.77	4406	4406	MS2	29/76	29	76	EAC2.RAW
High	G	2	IDELVEEAVEFADESPHPVR	16651	Unambiguous	genomic_reference:SL2.31ch12 evidence_code:10F0H1E1IEG gene_region:2683408-2687114 functional_description:"Pyruvate dehydrogenase E1 component alpha subunit (AHRD V1 ***- Q5N030_SYNP6); contains Interpro domain(s) IPR017597 Pyruvate dehydrogenase (acetyl-transferring) E1 component, alpha subunit, subgroup y "	2	1	Solyc12g009400.1.1		CID	1	0	1	1	0	3.15e-16	668	679	3.13	0	807.96	0	12	22	1437000	3	761.038	2281.1	0	0.49	58.55	5301	5301	MS2	29/76	29	76	EAC2.RAW
High	G	2	ILSLELLQGLLEGVSDSFTK	65754	Unambiguous	genomic_reference:SL2.31ch12 evidence_code:10F0H1E1IEG gene_region:7454847-7491963 functional_description:"Sec7 guanine nucleotide exchange factor (AHRD V1 **-* B0CY77_LACBS); contains Interpro domain(s) IPR000904 SEC7-like "	1	1	Solyc12g017830.1.1		CID	1	0	1	1	0	3.15e-16	218	250	3.52	0	1283.54	0	6	25	89480	3	721.405	2162.2	0	1.61	98.3	8592	8592	MS2	29/76	29	76	EAC2.RAW
High	H	2	LYmEARPMEEGLAEAIDEGR	9460	Unambiguous	genomic_reference:SL2.31ch08 evidence_code:10F0H1E1IEG gene_region:49546658-49549476 functional_description:"Elongation factor EF-2 (AHRD V1 **** Q9SGT4_ARATH); contains Interpro domain(s) IPR000795 Protein synthesis factor, GTP-binding "	2	1	Solyc08g062920.1.1	M3(Oxidation)	CID	0.0213	0	1	1	0	1.84e-05	487	535	3.29	0	1404.13	0	17	25	1260000	3	766.026	2296.06	0	2.77	45.81	4258	4258	MS2	29/76	29	76	EAC3_150410225534.RAW
High	H	2	FDDGLPPILTALEVLDNQIR	21890	Unambiguous	genomic_reference:SL2.31ch04 evidence_code:10F1H1E1IEG gene_region:1237570-1241219 functional_description:"ATP synthase subunit beta (AHRD V1 ***- O82722_NICSY); contains Interpro domain(s) IPR005722 ATPase, F1 complex, beta subunit "	1	1	Solyc04g007550.1.1		CID	1	0	1	1	0	4.84e-06	451	410	3.82	0	928.37	0	13	25	113300	3	747.069	2239.19	0	-1.66	95.18	8306	8306	MS2	29/76	29	76	EAC3_150410225534.RAW
High	H	2	FDEGLPPILTALEVLDNQIR	21919	Unambiguous	genomic_reference:SL2.31ch05 evidence_code:10F1H1E1IEG gene_region:2806055-2809657 functional_description:"ATP synthase subunit beta (AHRD V1 ***- O82722_NICSY); contains Interpro domain(s) IPR005722 ATPase, F1 complex, beta subunit "	1	1	Solyc05g008460.1.1		CID	1	0	1	1	0	0.000281	354	357	3.43	0	781.02	0	2	25	1173000	3	751.743	2253.21	0	0.53	95.66	8344	8344	MS2	29/76	29	76	EAC3_150410225534.RAW
High	I	2	YRVENLYEGPLDDAYANAIR	13960	Unambiguous	genomic_reference:SL2.31ch08 evidence_code:10F0H1E1IEG gene_region:49546658-49549476 functional_description:"Elongation factor EF-2 (AHRD V1 **** Q9SGT4_ARATH); contains Interpro domain(s) IPR000795 Protein synthesis factor, GTP-binding "	2	1	Solyc08g062920.1.1		CID	1	0	1	1	0	1.2e-06	627	628	4.25	0	1481.42	1	3	25	1060000	3	781.386	2342.14	0	0.46	50.08	4622	4622	MS2	29/76	29	76	EAC4_150411011441.RAW
High	J	2	FDDGLPPILTALEVLDNQIR	21890	Unambiguous	genomic_reference:SL2.31ch04 evidence_code:10F1H1E1IEG gene_region:1237570-1241219 functional_description:"ATP synthase subunit beta (AHRD V1 ***- O82722_NICSY); contains Interpro domain(s) IPR005722 ATPase, F1 complex, beta subunit "	1	1	Solyc04g007550.1.1		CID	1	0	1	1	0	0.000622	424	392	3	0	1003.29	0	15	25	297700	3	747.07	2239.2	0	-0.6	95.89	8550	8550	MS2	29/76	29	76	EAH1.RAW
High	K	2	TAAYGHFGRDDPDFTWETVK	10668	Unambiguous	genomic_reference:SL2.31ch09 evidence_code:10F1H1E1IEG gene_region:1749910-1751082 functional_description:"S-adenosylmethionine synthase (AHRD V1 ***- B5LAW6_CAPAN); contains Interpro domain(s) IPR002133 S-adenosylmethionine synthetase "	1	1	Solyc09g008280.1.1		CID	1	0	1	1	0	1.66e-05	460	482	3.19	0	920.67	1	23	22	1846000	3	771.691	2313.06	0	0.44	37.83	3548	3548	MS2	29/76	29	76	EAH2.RAW
High	K	2	FDLGKLmEVHGDYSEDVGVK	75162	Unambiguous	genomic_reference:SL2.31ch03 evidence_code:10F1H1E1IEG gene_region:53730005-53732068 functional_description:"40S ribosomal protein S1 (AHRD V1 ***- RS3A_LENED); contains Interpro domain(s) IPR001593 Ribosomal protein S3Ae "|genomic_reference:SL2.31ch06 evidence_code:10F1H1E1IEG gene_region:41101725-41104317 functional_description:"40S ribosomal protein S1 (AHRD V1 ***- RS3A_LACBS); contains Inter…	2	2	Solyc03g097900.1.1;Solyc06g072490.1.1	M7(Oxidation)	CID	1	0	1	1	0	3.64e-06	590	577	3.45	0	904.76	1	24	25	738900	3	752.029	2254.07	0	0.7	39.45	3689	3689	MS2	29/76	29	76	EAH2.RAW
High	K	2	ELVANDQWLNTEFITTVQQR	16359	Unambiguous	genomic_reference:SL2.31ch01 evidence_code:10F1H1E1IEG gene_region:76111189-76113622 functional_description:"Malate dehydrogenase (AHRD V1 **** Q645N0_SOLLC); contains Interpro domain(s) IPR011274 Malate dehydrogenase, NAD-dependent, cytosolic "	1	1	Solyc01g090710.1.1		CID	1	0	1	1	0	1.82e-09	749	706	3.96	0	1108.77	0	26	24	2223000	3	802.409	2405.21	0	1.23	58.75	5331	5331	MS2	29/76	29	76	EAH2.RAW
High	K	2	YHPEVDLDEVNALAQLmTWK	16841	Unambiguous	genomic_reference:SL2.31ch05 evidence_code:10F0H1E1IEG gene_region:61565704-61570805 functional_description:"Glutamate dehydrogenase (AHRD V1 **** Q94IA5_BRANA); contains Interpro domain(s) IPR014362 Glutamate dehydrogenase "	1	1	Solyc05g052100.1.1	M17(Oxidation)	CID	1	0	1	1	0	5.36e-07	650	694	4.51	0	1343.7	0	11	25	1025000	3	796.724	2388.16	0	2	60.82	5505	5505	MS2	29/76	29	76	EAH2.RAW
High	K	2	IESVPELPLVVSDSIEGIEK	18258	Unambiguous	genomic_reference:SL2.31ch09 evidence_code:10F1H1E1IEG gene_region:848637-850877 functional_description:"60S ribosomal protein L4/L1 (AHRD V1 ***- D7L8A9_ARALY); contains Interpro domain(s) IPR002136 Ribosomal protein L4/L1e "	1	1	Solyc09g007250.1.1		CID	1	0	1	1	0	3.39e-05	407	358	3.6	0	1050.37	0	25	25	418300	3	718.391	2153.16	0	0.39	68.22	6128	6128	MS2	29/76	29	76	EAH2.RAW
High	L	2	YHPEVDLDEVNALAQLmTWK	16841	Unambiguous	genomic_reference:SL2.31ch05 evidence_code:10F0H1E1IEG gene_region:61565704-61570805 functional_description:"Glutamate dehydrogenase (AHRD V1 **** Q94IA5_BRANA); contains Interpro domain(s) IPR014362 Glutamate dehydrogenase "	1	1	Solyc05g052100.1.1	M17(Oxidation)	CID	1	0	1	1	0	3.19e-16	642	686	4.01	0	1390.08	0	16	25	907300	3	796.724	2388.16	0	1.31	63.71	5751	5751	MS2	29/76	29	76	EAH4.RAW
High	L	2	VTGDDWDTWEDVAAHFNVAR	17746	Unambiguous	genomic_reference:SL2.31ch05 evidence_code:10F1H1E1IEG gene_region:7017596-7023482 functional_description:"Alpha-galactosidase (AHRD V1 *-*- D4LCA1_9FIRM); contains Interpro domain(s) IPR013785 Aldolase-type TIM barrel "	1	1	Solyc05g013720.1.1		CID	1	0	1	1	0	3.19e-16	401	363	3.98	0	613.6	0	22	25	738500	3	768.683	2304.03	0	0.53	66.94	6025	6025	MS2	29/76	29	76	EAH4.RAW
High	A	2	SSLmLHIDGSGPTAEDIGR	9329	Unambiguous	genomic_reference:SL2.31ch05 evidence_code:10F1H1E1IEG gene_region:5715526-5720889 functional_description:"Mitochondrial processing peptidase beta subunit (AHRD V1 ***- Q9AXQ2_CUCME); contains Interpro domain(s) IPR011237 Peptidase M16, core "	1	1	Solyc05g012480.1.1	M4(Oxidation)	CID	1	0	1	1	0	1.07e-09	598	603	3.17	0	1111.81	0	23	25	975400	3	657.986	1971.94	0	-0.5	33.83	3136	3136	MS2	29/72	29	72	AC1.RAW
High	C	2	SSLmLHIDGSGPTAEDIGR	9329	Unambiguous	genomic_reference:SL2.31ch05 evidence_code:10F1H1E1IEG gene_region:5715526-5720889 functional_description:"Mitochondrial processing peptidase beta subunit (AHRD V1 ***- Q9AXQ2_CUCME); contains Interpro domain(s) IPR011237 Peptidase M16, core "	1	1	Solyc05g012480.1.1	M4(Oxidation)	CID	1	0	1	1	0	6.45e-07	588	606	3.34	0	1132.06	0	9	25	971700	3	657.987	1971.95	0	1.08	32.81	3068	3068	MS2	29/72	29	72	AC3.RAW
High	C	2	NPSADmLLTPAELNLDLIR	17113	Unambiguous	genomic_reference:SL2.31ch06 evidence_code:10F1H1E1IEG gene_region:41485353-41487653 functional_description:"Fructokinase-like (AHRD V1 **-* Q307Z3_SOLTU); contains Interpro domain(s) IPR002173 Carbohydrate/puine kinase, PfkB, conserved site "	1	1	Solyc06g073190.1.1	M6(Oxidation)	CID	1	0	1	1	0	4.38e-06	535	476	3.14	0	1768.31	0	13	25	1125000	3	704.706	2112.1	0	1.75	61.68	5488	5488	MS2	29/72	29	72	AC3.RAW
High	D	2	SSLmLHIDGSGPTAEDIGR	9329	Unambiguous	genomic_reference:SL2.31ch05 evidence_code:10F1H1E1IEG gene_region:5715526-5720889 functional_description:"Mitochondrial processing peptidase beta subunit (AHRD V1 ***- Q9AXQ2_CUCME); contains Interpro domain(s) IPR011237 Peptidase M16, core "	1	1	Solyc05g012480.1.1	M4(Oxidation)	CID	1	0	1	1	0	5.37e-07	588	592	3.19	0	1112.09	0	20	25	802400	3	657.986	1971.94	0	-0.78	32.47	2988	2988	MS2	29/72	29	72	AH2.RAW
High	D	2	SAQLIGQAIANNPAFITLR	21636	Unambiguous	genomic_reference:SL2.31ch10 evidence_code:10F1H1E1IEG gene_region:2276303-2278346 functional_description:"Prohibitin 1-like protein (AHRD V1 ***- Q9AXM0_BRANA); contains Interpro domain(s) IPR000163 Prohibitin "	2	1	Solyc10g008140.1.1		CID	1	0	1	1	0	2.56e-06	251	232	3.53	0	1105.82	0	16	25	435700	3	666.71	1998.12	0	1.72	56.83	5063	5063	MS2	29/72	29	72	AH2.RAW
High	G	2	DQDFIEATREPGITFLAAK	36091	Unambiguous	genomic_reference:SL2.31ch07 evidence_code:10F1H1E1IEG gene_region:57715151-57720088 functional_description:"Aspartic proteinase (AHRD V1 **-* Q96383_CENCA); contains Interpro domain(s) IPR001461 Peptidase A1 "	1	1	Solyc07g051850.1.1		CID	1	0	1	1	0	4.39e-08	607	622	3.13	0	919.37	1	31	21	1504000	3	708.032	2122.08	0	-0.02	48.57	4472	4472	MS2	29/72	29	72	EAC2.RAW
High	H	2	EEIPELLKLDDVIDLVIPR	21316	Unambiguous	genomic_reference:SL2.31ch06 evidence_code:10F0H1E1IEG gene_region:14304374-14312974 functional_description:"Gamma-glutamyl phosphate reductase (AHRD V1 ***- D3TQ43_GLOMM); contains Interpro domain(s) IPR005766 Delta l-pyrroline-5-carboxylate synthetase "	2	1	Solyc06g019170.1.1		CID	1	0	1	1	0	5.98e-05	136	143	3.42	0	1466.33	1	7	25	196600	3	740.422	2219.25	0	-1.48	86.68	7649	7649	MS2	29/72	29	72	EAC3_150410225534.RAW
High	I	2	LANSVDLGTLRDPQQDAER	7939	Unambiguous	genomic_reference:SL2.31ch11 evidence_code:10F1H1E1IEG gene_region:26506317-26509279 functional_description:"Ubiquinol-cytochrome c reductase iron-sulfur subunit (AHRD V1 **** Q38M54_SOLTU); contains Interpro domain(s) IPR005805 Rieske iron-sulphur protein, C-terminal "	1	1	Solyc11g039840.1.1		CID	1	0	1	1	0	1.9e-07	594	561	3.59	0	908.95	1	19	24	1404000	3	700.022	2098.05	0	0.1	30.88	2940	2940	MS2	29/72	29	72	EAC4_150411011441.RAW
High	K	2	EEIPELLKLDDVIDLVIPR	21316	Unambiguous	genomic_reference:SL2.31ch06 evidence_code:10F0H1E1IEG gene_region:14304374-14312974 functional_description:"Gamma-glutamyl phosphate reductase (AHRD V1 ***- D3TQ43_GLOMM); contains Interpro domain(s) IPR005766 Delta l-pyrroline-5-carboxylate synthetase "	2	1	Solyc06g019170.1.1		CID	1	0	1	1	0	6.03e-07	130	127	3.72	0	1488.88	1	9	25	226400	3	740.423	2219.25	0	0.33	87.92	7769	7769	MS2	29/72	29	72	EAH2.RAW
High	K	2	LLALIDDIYKYVDDVVEGR	65732	Unambiguous	genomic_reference:SL2.31ch11 evidence_code:10F1H1E1IEG gene_region:6453695-6462103 functional_description:"Eukaryotic translation initiation factor 3 subunit 5 (AHRD V1 ***- B4FRD9_MAIZE); contains Interpro domain(s) IPR000555 Mov34/MPN/PAD-1 "	1	1	Solyc11g013440.1.1		CID	1	0	1	1	0	4.91e-07	442	427	3.7	0	1218.22	1	14	25	92730	3	737.064	2209.18	0	0.65	97.86	8650	8650	MS2	29/72	29	72	EAH2.RAW
High	L	2	FLGVTEPELLKDAVDLDIR	18653	Unambiguous	genomic_reference:SL2.31ch07 evidence_code:10F0H1E1IEG gene_region:56329845-56335708 functional_description:"Chaperone protein htpG (AHRD V1 ***- HTPG_IDILO); contains Interpro domain(s) IPR001404 Heat shock protein Hsp90 "	1	1	Solyc07g047790.1.1		CID	1	0	1	1	0	3.19e-16	327	333	3.04	0	712.45	1	25	25	454100	3	715.061	2143.17	0	1.49	71.57	6411	6411	MS2	29/72	29	72	EAH4.RAW
High	A	2	GFSIDDTVGKDVVAELTK	16257	Unambiguous	genomic_reference:SL2.31ch06 evidence_code:10F0H1E1IEG gene_region:38097754-38102045 functional_description:"Hexokinase (AHRD V1 ***- Q9FR27_SOLLC); contains Interpro domain(s) IPR001312 Hexokinase "	1	1	Solyc06g066440.1.1		CID	1	0	1	1	0	0.000139	588	590	3.32	0	906.97	1	17	25	1157000	3	631.998	1893.98	0	-0.48	58.68	5246	5246	MS2	29/68	29	68	AC1.RAW
High	B	2	EVLQREDDLNEIVQLVGK	15186	Unambiguous	genomic_reference:SL2.31ch12 evidence_code:10F1H1E1IEG gene_region:47132509-47140184 functional_description:"V-type ATP synthase alpha chain (AHRD V1 ***- VATA_METTH); contains Interpro domain(s) IPR005725 ATPase, V1 complex, subunit A "	2	1	Solyc12g055800.1.1		CID	1	0	1	1	0	0.000118	411	381	3.87	0	1149.14	1	17	25	942700	3	699.711	2097.12	0	0.56	54.18	4897	4897	MS2	29/68	29	68	AC2.RAW
High	B	2	LLEVDPDGAILAIGDMmR	14760	Unambiguous	genomic_reference:SL2.31ch11 evidence_code:10F1H1E1IEG gene_region:2859715-2863853 functional_description:"Acyl- (AHRD V1 ***- Q4JIJ4_9ROSI); contains Interpro domain(s) IPR005067 Fatty acid desaturase, type 2 "	1	1	Solyc11g008680.1.1	M17(Oxidation)	CID	0.0026	0	1	1	0	1.71e-06	616	622	3.91	0	1455.51	0	29	25	839000	3	648.998	1944.98	0	0.55	60.98	5461	5461	MS2	29/68	29	68	AC2.RAW
High	B	2	LLEVDPDGAILAIGDMMR	14760	Unambiguous	genomic_reference:SL2.31ch11 evidence_code:10F1H1E1IEG gene_region:2859715-2863853 functional_description:"Acyl- (AHRD V1 ***- Q4JIJ4_9ROSI); contains Interpro domain(s) IPR005067 Fatty acid desaturase, type 2 "	1	1	Solyc11g008680.1.1		CID	1	0	1	1	0	1.1e-05	546	542	3.77	0	1333.44	0	28	25	74950	3	643.666	1928.98	0	1.28	75.58	6671	6671	MS2	29/68	29	68	AC2.RAW
High	C	2	mIQAVDDMLSHDIPELLK	17096	Unambiguous	genomic_reference:SL2.31ch11 evidence_code:10F0H1E1IEG gene_region:4963684-4968355 functional_description:"EH-domain-containing protein 1 (AHRD V1 **-* B6U193_MAIZE); contains Interpro domain(s) IPR001401 Dynamin, GTPase region "	1	1	Solyc11g012020.1.1	M1(Oxidation)	CID	1	0	1	1	0	1.79e-08	628	609	3.62	0	896.22	0	6	25	915200	3	695.352	2084.04	0	0.42	61.36	5462	5462	MS2	29/68	29	68	AC3.RAW
High	F	2	YAADEDAFFADYAEAHLK	14432	Unambiguous	genomic_reference:SL2.31ch06 evidence_code:10F1H1E1IEG gene_region:182627-184940 functional_description:"Ascorbate peroxidase (AHRD V1 ***- Q9SMD3_SOLLC); contains Interpro domain(s) IPR019793 Peroxidases heam-ligand binding site IPR019794 Peroxidase, active site IPR002016 Haem peroxidase, plant/fungal/bacterial "	2	1	Solyc06g005160.1.1		CID	1	0	1	1	0	7.86e-12	294	277	4.02	0	550.65	0	28	25	373400	3	682.974	2046.91	0	0.24	53.95	4967	4967	MS2	29/68	29	68	AH4.RAW
High	F	2	VAMIGFAASLLGEAITGK	125197	Unambiguous	genomic_reference:SL2.31ch06 evidence_code:10F1H1E1IEG gene_region:34711883-34713649 functional_description:"Chloroplast photosystem II-associated protein (AHRD V1 ***- A8HPM2_CHLRE); contains Interpro domain(s) IPR001344 Chlorophyll A-B binding protein "	1	1	Solyc06g060340.1.1		CID	1	0	1	1	0	5.2e-10	306	317	4.15	0	1590.54	0	5	25	58690	3	583.658	1748.96	0	-0.69	92.43	8169	8169	MS2	29/68	29	68	AH4.RAW
High	G	2	IRPVGDELASGSGQINPR	6260	Unambiguous	genomic_reference:SL2.31ch09 evidence_code:10F0H1E0IEG gene_region:3235239-3241886 functional_description:"Subtilisin-like serine protease (AHRD V1 **-* Q8L7D2_ARATH); contains Interpro domain(s) IPR015500 Peptidase S8, subtilisin-related "	1	1	Solyc09g009750.1.1		CID	1	0	1	1	0	3.15e-16	481	500	3.05	0	1593.05	0	72	16	1992000	3	622.666	1865.98	0	0.12	20.88	2048	2048	MS2	29/68	29	68	EAC2.RAW
High	G	2	QLEEAEIDAIVAEIEAEK	19072	Unambiguous	genomic_reference:SL2.31ch01 evidence_code:10F1H1E1IEG gene_region:89447148-89449678 functional_description:"Proteasome subunit alpha type (AHRD V1 ***- Q38HT8_SOLTU); contains Interpro domain(s) IPR000426 Proteasome, alpha-subunit, conserved site "	1	1	Solyc01g111450.1.1		CID	1	0	1	1	0	3.15e-16	589	601	3.9	0	1794.88	0	36	25	374000	3	667.34	2000	0	-1.35	70.49	6288	6288	MS2	29/68	29	68	EAC2.RAW
High	G	2	IDLEWVHVLSEGWASPLK	64208	Unambiguous	genomic_reference:SL2.31ch03 evidence_code:10F1H1E1IEG gene_region:148771-153011 functional_description:"Sulfate adenylyltransferase (AHRD V1 **** Q43183_SOLTU); contains Interpro domain(s) IPR002650 ATP-sulfurylase "	1	1	Solyc03g005260.1.1		CID	1	0	1	1	0	3.15e-16	479	483	3.71	0	1552.26	0	44	25	190300	3	693.703	2079.09	0	1.64	75.29	6684	6684	MS2	29/68	29	68	EAC2.RAW
High	H	2	YAADEDAFFADYAEAHLK	14432	Unambiguous	genomic_reference:SL2.31ch06 evidence_code:10F1H1E1IEG gene_region:182627-184940 functional_description:"Ascorbate peroxidase (AHRD V1 ***- Q9SMD3_SOLLC); contains Interpro domain(s) IPR019793 Peroxidases heam-ligand binding site IPR019794 Peroxidase, active site IPR002016 Haem peroxidase, plant/fungal/bacterial "	2	1	Solyc06g005160.1.1		CID	1	0	1	1	0	1.03e-06	299	285	3.62	0	663.05	0	28	25	1047000	3	682.974	2046.91	0	0.07	52.12	4793	4793	MS2	29/68	29	68	EAC3_150410225534.RAW
High	H	2	HTDVLDAITQHLEIGSYR	38215	Unambiguous	genomic_reference:SL2.31ch07 evidence_code:10F1H1E1IEG gene_region:62455643-62461072 functional_description:"Phosphoenolpyruvate carboxylase 2 (AHRD V1 ***- Q9SCB2_SOLLC); contains Interpro domain(s) IPR015813 Pyruvate/Phosphoenolpyruvate kinase, catalytic core IPR001449 Phosphoenolpyruvate carboxylase "	3	1	Solyc07g062530.1.1		CID	1	0	1	1	0	2.62e-06	560	601	3.66	0	1397.56	0	44	25	352900	3	690.02	2068.05	0	-0.26	59.21	5399	5399	MS2	29/68	29	68	EAC3_150410225534.RAW
High	I	2	YAADEDAFFADYAEAHLK	14432	Unambiguous	genomic_reference:SL2.31ch06 evidence_code:10F1H1E1IEG gene_region:182627-184940 functional_description:"Ascorbate peroxidase (AHRD V1 ***- Q9SMD3_SOLLC); contains Interpro domain(s) IPR019793 Peroxidases heam-ligand binding site IPR019794 Peroxidase, active site IPR002016 Haem peroxidase, plant/fungal/bacterial "	2	1	Solyc06g005160.1.1		CID	1	0	1	1	0	4.68e-08	329	297	3.2	0	567.6	0	22	25	579500	3	682.975	2046.91	0	1.41	51.73	4763	4763	MS2	29/68	29	68	EAC4_150411011441.RAW
High	I	2	LLEVDPDGAILAIGDmmR	14760	Unambiguous	genomic_reference:SL2.31ch11 evidence_code:10F1H1E1IEG gene_region:2859715-2863853 functional_description:"Acyl- (AHRD V1 ***- Q4JIJ4_9ROSI); contains Interpro domain(s) IPR005067 Fatty acid desaturase, type 2 "	1	1	Solyc11g008680.1.1	M16(Oxidation); M17(Oxidation)	CID	1	0	1	1	0	3.78e-06	669	611	3.16	0	1080.4	0	57	25	167900	3	654.329	1960.97	0	-0.25	52.87	4862	4862	MS2	29/68	29	68	EAC4_150411011441.RAW
High	I	2	MIQAVDDMLSHDIPELLK	17096	Unambiguous	genomic_reference:SL2.31ch11 evidence_code:10F0H1E1IEG gene_region:4963684-4968355 functional_description:"EH-domain-containing protein 1 (AHRD V1 **-* B6U193_MAIZE); contains Interpro domain(s) IPR001401 Dynamin, GTPase region "	1	1	Solyc11g012020.1.1		CID	1	0	1	1	0	6.81e-08	568	587	4.14	0	1250.88	0	30	25	167000	3	690.021	2068.05	0	1.71	66.66	6030	6030	MS2	29/68	29	68	EAC4_150411011441.RAW
High	K	2	GFSIDDTVGKDVVAELTK	16257	Unambiguous	genomic_reference:SL2.31ch06 evidence_code:10F0H1E1IEG gene_region:38097754-38102045 functional_description:"Hexokinase (AHRD V1 ***- Q9FR27_SOLLC); contains Interpro domain(s) IPR001312 Hexokinase "	1	1	Solyc06g066440.1.1		CID	1	0	1	1	0	1.33e-06	610	614	3.56	0	918.17	1	14	25	1096000	3	631.998	1893.98	0	0.19	57.98	5267	5267	MS2	29/68	29	68	EAH2.RAW
High	A	2	LAEQAERYEEMVEFMEK	10956	Unambiguous	genomic_reference:SL2.31ch03 evidence_code:10F0H1E1IEG gene_region:10154636-10156449 functional_description:"14-3-3 protein beta/alpha-1 (AHRD V1 **-- 143B1_DANRE); contains Interpro domain(s) IPR000308 14-3-3 protein "|genomic_reference:SL2.31ch04 evidence_code:10F1H1E1IEG gene_region:4428755-4429971 functional_description:"14-3-3 protein beta/alpha-1 (AHRD V1 **-- 143B1_ONCMY); contains Interpr…	4	4	Solyc03g034180.1.1;Solyc04g012120.1.1;Solyc04g074510.1.1;Solyc11g010200.1.1		CID	1	0	1	1	0	7.69e-07	335	365	3.89	0	1488.83	1	44	17	1129000	3	711.326	2131.96	0	-1.27	52.18	4702	4702	MS2	29/64	29	64	AC1.RAW
High	A	2	FVADGVFFAELNEVLTR	21070	Unambiguous	genomic_reference:SL2.31ch07 evidence_code:10F1H1E1IEG gene_region:49600267-49604175 functional_description:"Ribosomal protein (AHRD V1 ***- B3TLR8_ELAGV); contains Interpro domain(s) IPR005703 Ribosomal protein S3, eukaryotic/archaeal "|genomic_reference:SL2.31ch08 evidence_code:10F1H1E1IEG gene_region:47365036-47367631 functional_description:"Ribosomal protein (AHRD V1 ***- B3TLR8_ELAGV); conta…	3	2	Solyc07g041310.1.1;Solyc08g061960.1.1		CID	1	0	1	1	0	1.39e-06	550	535	3.68	0	1104.81	0	9	25	147000	3	643.003	1926.99	0	-1.06	83.83	7304	7304	MS2	29/64	29	64	AC1.RAW
High	A	2	EDIAIVLISQYVANmIR	21219	Unambiguous	genomic_reference:SL2.31ch02 evidence_code:10F1H1E1IEG gene_region:32972773-32977550 functional_description:"Vacuolar ATPase F subunit (AHRD V1 **** B8Y6I1_HEVBR); contains Interpro domain(s) IPR005772 ATPase, V1 complex, subunit F, eukaryotic "	1	1	Solyc02g068450.1.1	M15(Oxidation)	CID	1	0	1	1	0	1.35e-05	431	451	3.64	0	1611.79	0	38	25	61620	3	655.355	1964.05	0	-0.37	85.54	7445	7445	MS2	29/64	29	64	AC1.RAW
High	B	2	DRYIPDDAmIEGSHGLR	7045	Unambiguous	genomic_reference:SL2.31ch10 evidence_code:10F0H1E0IEG gene_region:64082694-64085929 functional_description:"Beta-fructofuranosidase insoluble isoenzyme 2 (AHRD V1 **-* B6U1H5_MAIZE); contains Interpro domain(s) IPR001362 Glycoside hydrolase, family 32 "	1	1	Solyc10g085640.1.1	M9(Oxidation)	CID	1	0	1	1	0	2.47e-06	463	420	5.47	0	1054.34	1	18	25	970800	3	654.311	1960.92	0	0.53	26.38	2501	2501	MS2	29/64	29	64	AC2.RAW
High	B	2	TLDWDKSTLDTLGISAK	13199	Unambiguous	genomic_reference:SL2.31ch03 evidence_code:10F0H1E1IEG gene_region:60691306-60693886 functional_description:"Glycerol kinase (AHRD V1 ***- Q6RUF8_SOYBN); contains Interpro domain(s) IPR005999 Glycerol kinase "	1	1	Solyc03g117490.1.1		CID	1	0	1	1	0	0.000155	535	537	3.05	0	1175.17	1	13	24	959900	3	621.996	1863.97	0	1.35	46.9	4285	4285	MS2	29/64	29	64	AC2.RAW
High	B	2	FVADGVFFAELNEVLTR	21070	Unambiguous	genomic_reference:SL2.31ch07 evidence_code:10F1H1E1IEG gene_region:49600267-49604175 functional_description:"Ribosomal protein (AHRD V1 ***- B3TLR8_ELAGV); contains Interpro domain(s) IPR005703 Ribosomal protein S3, eukaryotic/archaeal "|genomic_reference:SL2.31ch08 evidence_code:10F1H1E1IEG gene_region:47365036-47367631 functional_description:"Ribosomal protein (AHRD V1 ***- B3TLR8_ELAGV); conta…	3	2	Solyc07g041310.1.1;Solyc08g061960.1.1		CID	1	0	1	1	0	1.4e-07	533	529	3.79	0	1208.71	0	9	25	142600	3	643.004	1927	0	0.65	82.39	7229	7229	MS2	29/64	29	64	AC2.RAW
High	C	2	DRYIPDDAmIEGSHGLR	7045	Unambiguous	genomic_reference:SL2.31ch10 evidence_code:10F0H1E0IEG gene_region:64082694-64085929 functional_description:"Beta-fructofuranosidase insoluble isoenzyme 2 (AHRD V1 **-* B6U1H5_MAIZE); contains Interpro domain(s) IPR001362 Glycoside hydrolase, family 32 "	1	1	Solyc10g085640.1.1	M9(Oxidation)	CID	1	0	1	1	0	4.65e-07	473	433	4.29	0	1115.84	1	18	22	1505000	3	654.311	1960.92	0	0.16	25.79	2439	2439	MS2	29/64	29	64	AC3.RAW
High	C	2	LAEQAERYEEmVEFMEK	10956	Unambiguous	genomic_reference:SL2.31ch03 evidence_code:10F0H1E1IEG gene_region:10154636-10156449 functional_description:"14-3-3 protein beta/alpha-1 (AHRD V1 **-- 143B1_DANRE); contains Interpro domain(s) IPR000308 14-3-3 protein "|genomic_reference:SL2.31ch04 evidence_code:10F1H1E1IEG gene_region:4428755-4429971 functional_description:"14-3-3 protein beta/alpha-1 (AHRD V1 **-- 143B1_ONCMY); contains Interpr…	4	4	Solyc03g034180.1.1;Solyc04g012120.1.1;Solyc04g074510.1.1;Solyc11g010200.1.1	M11(Oxidation)	CID	1	0	1	1	0	1.02e-06	404	378	3.91	0	1729.33	1	24	25	390800	3	716.661	2147.97	0	2.7	38.64	3576	3576	MS2	29/64	29	64	AC3.RAW
High	C	2	ASELAKPEEVIEQIDVR	56211	Unambiguous	genomic_reference:SL2.31ch08 evidence_code:10F0H1E1IEG gene_region:54615452-54621189 functional_description:"RNA-binding La domain protein (AHRD V1 *--- B8NID1_ASPFN); contains Interpro domain(s) IPR014886 RNA binding motif "	1	1	Solyc08g068310.1.1		CID	1	0	1	1	0	3.34e-05	550	517	3.27	0	1101.38	0	80	25	338600	3	642.677	1926.02	0	-1.16	43.46	3984	3984	MS2	29/64	29	64	AC3.RAW
High	G	2	NQDGYAVEADKIWVNNR	74173	Unambiguous	genomic_reference:SL2.31ch01 evidence_code:10F0H1E1IEG gene_region:88618892-88622323 functional_description:"Purple acid phosphatase (AHRD V1 **** Q84KZ2_TOBAC); contains Interpro domain(s) IPR015914 Purple acid phosphatase, N-terminal "	2	1	Solyc01g110060.1.1		CID	1	0	1	1	0	3.15e-16	600	560	3.37	0	944.48	1	24	18	2545000	3	664.657	1991.96	0	0.31	33.21	3161	3161	MS2	29/64	29	64	EAC2.RAW
High	I	2	DRYIPDDAMIEGSHGLR	7045	Unambiguous	genomic_reference:SL2.31ch10 evidence_code:10F0H1E0IEG gene_region:64082694-64085929 functional_description:"Beta-fructofuranosidase insoluble isoenzyme 2 (AHRD V1 **-* B6U1H5_MAIZE); contains Interpro domain(s) IPR001362 Glycoside hydrolase, family 32 "	1	1	Solyc10g085640.1.1		CID	1	0	1	1	0	5.18e-10	541	546	4.64	0	1294.32	1	16	25	796500	3	648.98	1944.93	0	0.96	33.77	3200	3200	MS2	29/64	29	64	EAC4_150411011441.RAW
High	J	2	AMGFPTEFFPVLFAIPR	21769	Unambiguous	genomic_reference:SL2.31ch12 evidence_code:10F1H1E1IEG gene_region:3859247-3866167 functional_description:"Citrate synthase (AHRD V1 ***- B9IFM7_POPTR); contains Interpro domain(s) IPR010953 Citrate synthase, type II "	1	1	Solyc12g011000.1.1		CID	1	0	1	1	0	8.75e-05	525	542	3.46	0	1979.32	0	43	25	110900	3	647.344	1940.02	0	1.2	93.13	8331	8331	MS2	29/64	29	64	EAH1.RAW
High	L	2	IEDLSSQLQSQAAEQFK	11516	Unambiguous	genomic_reference:SL2.31ch10 evidence_code:10F0H1E1IEG gene_region:61533717-61537084 functional_description:"Nascent polypeptide-associated complex alpha subunit-like protein (AHRD V1 ***- B6T903_MAIZE); contains Interpro domain(s) IPR016641 Nascent polypeptide-associated complex, alpha subunit "	2	1	Solyc10g081030.1.1		CID	1	0	1	1	0	3.19e-16	712	709	3.24	0	1315.66	0	29	25	155800	3	641.322	1921.95	0	0.47	42.99	3986	3986	MS2	29/64	29	64	EAH4.RAW
[truncated: 21,460 more rows]

## Sheet: Peptides_Leaves_psms
Confidence Level	Search ID	Processing Node No	Sequence	Unique Sequence ID	PSM Ambiguity	Protein Descriptions	# Proteins	# Protein Groups	Protein Group Accessions	Modifications	Activation Type	DeltaScore	DeltaCn	Rank	Search Engine Rank	q-Value	PEP	Decoy Peptides Matched	Peptides Matched	XCorr	Probability	SpScore	# Missed Cleavages	Isolation Interference [%]	Ion Inject Time [ms]	Intensity	Charge	m/z [Da]	MH+ [Da]	Delta Mass [Da]	Delta Mass [PPM]	RT [min]	First Scan	Last Scan	MS Order	Ions Matched	Matched Ions	Total Ions	Spectrum File	Annotation
[truncated: 16,630 more rows]
